# Supplementary material for: Palladium-catalyzed and ligand-controlled divergent cycloadditions of vinylidenecyclopropane-diesters with para-quinone methides enabled by zwitterionic π-propargyl palladium species
Source: Royal Society of Chemistry journal article supplement (doi:10.1039/d4qo00368c), 2024-01-01
Supplement: d4qo00368c1.pdf [file d4qo00368c1.pdf]

# Palladium-catalyzed and ligand-controlled divergent cycloadditions of vinylidenecyclopropane-diester with *para*-quinone methides enabled by zwitterionic $\pi$ -propargyl palladium species

Jia-Hao Shen<sup>1</sup>, Yong-Jie Long<sup>2</sup>, Min Shi<sup>2</sup> and Yin Wei<sup>1,2\*</sup>

<sup>1</sup> School of Materials and Chemistry, University of Shanghai for Science and Technology, 516 Jungong Road, Shanghai, 200093, China.

<sup>2</sup> State Key Laboratory of Organometallic Chemistry, Center for Excellence in Molecular Synthesis, Shanghai Institute of Organic Chemistry, University of Chinese Academy of Sciences, Chinese Academy of Sciences, 345 Lingling Road, Shanghai 200032 China. E-mail: [weiyin@sioac.ac.cn](mailto:weiyin@sioac.ac.cn)

## Table of Contents

|                                                                                                 |      |
|-------------------------------------------------------------------------------------------------|------|
| (A) General Information .....                                                                   | S2   |
| (B) General Procedure for the Preparation of <i>para</i> -Quinone Methides <b>1a-1u</b> .....   | S3   |
| (C) General Procedure for the Preparation of <i>para</i> -Quinone Methides <b>1y-1ag</b> .....  | S4   |
| (D) General Procedure for the Synthesis of Compounds <b>3</b> and <b>4</b> .....                | S7   |
| (E) The General Procedure for the Scale-up Synthesis of Compounds <b>3a</b> and <b>4a</b> ..... | S8   |
| (F) Reaction Optimization .....                                                                 | S9   |
| (G) Reaction of Unreactive Substrate .....                                                      | S11  |
| (H) Control Experiments.....                                                                    | S12  |
| (I) Asymmetric Variation.....                                                                   | S14  |
| (J) Characterization and Spectroscopic Data of Substrates and Products.....                     | S17  |
| (K) X-ray Analysis.....                                                                         | S135 |
| (L) Computational Details .....                                                                 | S137 |
| (M) References.....                                                                             | S235 |

## (A) General Information

Melting points were determined on a digital melting point apparatus and temperatures were uncorrected. Proton nuclear magnetic resonance ( $^1\text{H}$  NMR) spectra, carbon nuclear magnetic resonance ( $^{13}\text{C}$  NMR) spectra fluorine nuclear magnetic resonance ( $^{19}\text{F}$  NMR) were recorded at 400 MHz, 100 MHz and 376 MHz, respectively.  $^1\text{H}$  NMR spectrum uses TMS ( $\delta = 0.00$  ppm) as internal standard,  $^{13}\text{C}$  NMR spectrum uses  $\text{CDCl}_3$  ( $\delta = 77.00$  ppm) as internal standard. Data are presented as follows: chemical shift (ppm), multiplicity (s = singlet, d = doublet, t = triplet, q = quartet, m = multiplet, br = broad, hept = heptet), coupling constants in Hertz (Hz) and integration. IR spectra were recorded on a Perkin-Elmer PE-983 spectrometer with absorption in  $\text{cm}^{-1}$ . High Resolution Mass Spectra (HRMS) were recorded by ESI and MALDI method. The employed solvents were dry up by standard methods when necessary. Commercially obtained reagents were used without further purification. Petroleum ether refers to the fraction with boiling point in the range 60-90  $^\circ\text{C}$ . For thin-layer chromatography (TLC), silica gel plates (Huanghai GF254) were used. Column chromatography was carried out using 300-400 mesh silica gel at increased pressure.

The preparation of *para*-quinone methides (*p*-QMs) **1**,<sup>1</sup> vinylidenecyclopropane-diester **2**,<sup>2</sup> and compounds **1a-1u**,<sup>1,3-6,8</sup> **1y**,<sup>4</sup> **1aa**,<sup>4,7</sup> **1af**,<sup>8</sup> **1ag**<sup>8</sup> have been reported in the previous literature.

**(B) General Procedure for the Preparation of *para*-Quinone Methides 1a-1u.<sup>1</sup>**

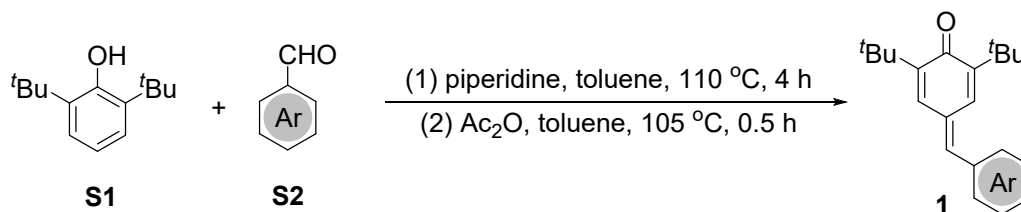

**General procedure for the synthesis of *p*-QMs 1a~1u from phenols and aldehydes.**

A solution of phenols (5.0 mmol, 1.0 equiv) and the corresponding aldehydes (5.0 mmol, 1.0 equiv) in toluene (20 mL) was heated to reflux. Piperidine (10.0 mmol, 2.0 equiv 1.0 mL) was dropwise added within 1.0 h. The reaction mixture was continued to reflux for 6-15 h. After cooling just below the boiling point of the reaction mixture, acetic anhydride (10.0 mmol, 2.0 equiv, 0.51 g) was added and stirring was continued for 15 min. Then, the reaction mixture was cooled to room temperature and the organic phases were removed under reduced pressure. The crude products were purified by a flash column chromatography on silica gel and further recrystallized from *n*-hexane, affording the desired *p*-QMs.

### (C) General Procedure for the Preparation of *para*-Quinone Methides **1y-1ag**.<sup>4</sup>

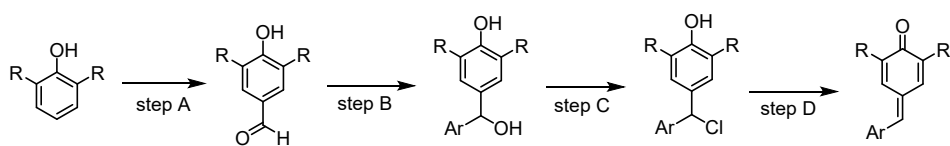

| substrate  | R               | Ar                                               |
|------------|-----------------|--------------------------------------------------|
| <b>1y</b>  | Ph              | C <sub>6</sub> H <sub>5</sub>                    |
| <b>1z</b>  | Ph              | 4-F-C <sub>6</sub> H <sub>4</sub>                |
| <b>1aa</b> | Ph              | 4-OMe-C <sub>6</sub> H <sub>4</sub>              |
| <b>1ab</b> | Ph              | 4-Me-C <sub>6</sub> H <sub>4</sub>               |
| <b>1ac</b> | Ph              | 4- <sup>t</sup> Bu-C <sub>6</sub> H <sub>4</sub> |
| <b>1ad</b> | Ph              | 2-Me-C <sub>6</sub> H <sub>4</sub>               |
| <b>1ae</b> | Ph              | 3-Cl-C <sub>6</sub> H <sub>4</sub>               |
| <b>1af</b> | <sup>i</sup> Pr | C <sub>6</sub> H <sub>5</sub>                    |
| <b>1ag</b> | Me              | C <sub>6</sub> H <sub>5</sub>                    |

All the above substrates were synthesized by this method; here, phenyl substrate (**1y**) was used as an example.

#### Step A:<sup>5</sup>

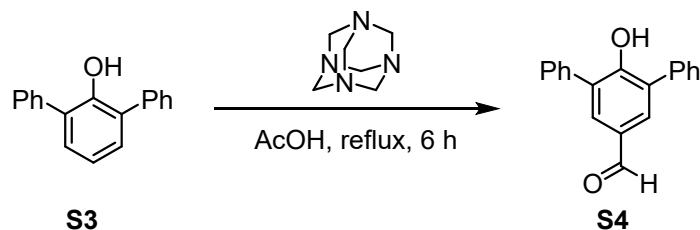

A stirred mixture of **S3** (5.0 g, 20 mmol, 1.0 equiv) and hexamethylenetetramine (5.5 g, 39 mmol, 2.0 equiv) was treated dropwise with AcOH (45 mL). After 20 min, H<sub>2</sub>O (10 mL) was added, and the mixture was heated to reflux. Distillate was removed until the reaction pot temperature was at 114 °C. Reflux was then maintained for 6 h. Then cooled mixture was treated with H<sub>2</sub>O (20 mL), and the precipitated product was filtered and washed with H<sub>2</sub>O. Recrystallization from EtOH gave 3.0 g (55%) of **S4**.

#### Step B:

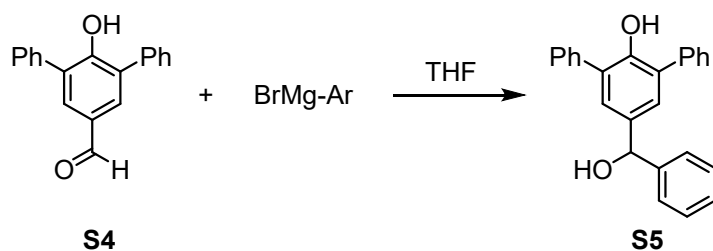

Phenylmagnesium bromide (6.0 mL, 2.4 equiv) (2.0 M, THF) was added dropwise to a solution of the adequate compound **S4** (1.37 g, 5.0 mmol, 1.0 equiv) in dry THF (20 mL). After stirring for 12 h, the reaction mixture was hydrolyzed with saturated aqueous  $\text{NH}_4\text{Cl}$  solution (25 mL). The aqueous phase was washed with diethyl ether. Then the combined organic layers were dried over anhydrous  $\text{MgSO}_4$  and the solvent was evaporated under reduced pressure. Crude products with low solubility in *n*-pentane were suspended in *n*-pentane. After 1.0 h of stirring, the purified product was isolated by filtration. Crude products with high solubility in  $\text{Et}_2\text{O}$  were crystallized from diethyl ether/*n*-pentane.

#### Step C:

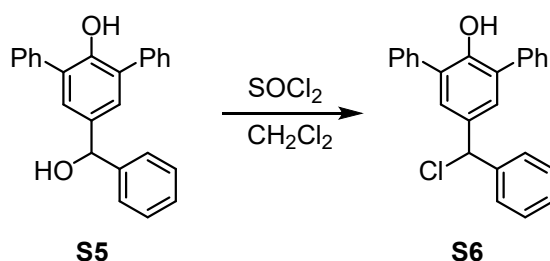

Under an atmosphere of dry  $\text{N}_2$ ,  $\text{SOCl}_2$  (1.2 equiv) was added dropwise to a solution of compound **S5** (1.0 mmol, 1.0 equiv) in dry  $\text{CH}_2\text{Cl}_2$  (20 mL) at 0 °C. After stirring at room temperature for 8-12 h, the solvent was removed under reduced pressure. Because the products were formed nearly quantitatively, they were used for the following step without further purification.

#### Step D:

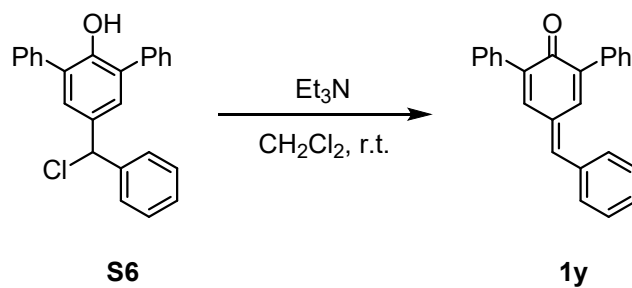

Under an atmosphere of dry  $\text{N}_2$ , the **S6** (dried in the previous step) was dissolved in dry  $\text{CH}_2\text{Cl}_2$  (20 mL) and 1.3 equiv of  $\text{NEt}_3$  were added. After stirring for 2-3 h, diethyl ether was added. The resulting precipitate was filtered off and dried under reduced pressure, the residue was purified by a flash alkaline column chromatography to afford the desired product.

#### (D) General Procedure for the Synthesis of Compounds 3 and 4

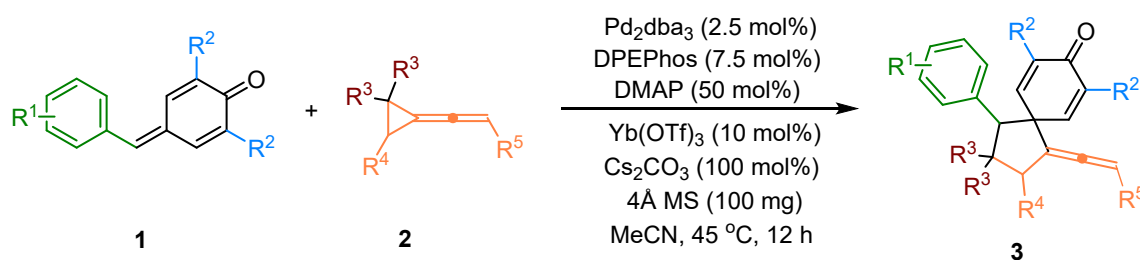

Tris(dibenzylideneacetone)dipalladium (0.0023 g, 0.002 mmol, 2.5 mol%), 4Å MS (100 mg) and DPEphos (0.0040 g, 0.007 mmol, 7.5 mol%) were added to an oven dried 10 mL sealed tube equipped with a magnetic stirring bar under argon atmosphere. The resulting catalyst system was stirred in MeCN (degassed) (1.5 mL) for 30 minutes. After that, **1** (0.1 mmol), **2** (0.25 mmol), Yb(OTf)<sub>3</sub> (0.0062 g, 0.01 mmol, 10 mol%), DMAP (0.0061 g, 0.05 mmol, 50 mol%) and Cs<sub>2</sub>CO<sub>3</sub> (0.1 mmol, 1.0 equiv) were added under argon atmosphere. The reaction mixture was stirred at 45 °C for 12 h. The reaction solution was filtered through a pad of celite to remove insoluble solids. Then, the solvent was evaporated under vacuum and the residue was purified by a column chromatography to afford the desired product **3**.

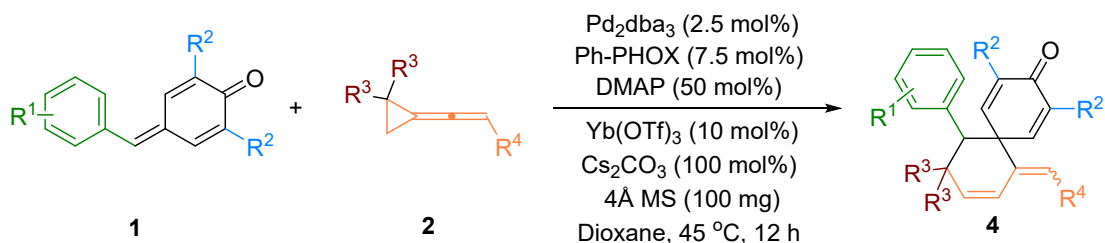

Tris(dibenzylideneacetone)dipalladium (0.002 mmol, 2.5 mol%), 4Å MS (100 mg) and Ph-PHOX (0.007 mmol, 7.5 mol%) was added to an oven dried 10 mL sealed tube equipped with a magnetic stirring bar under argon atmosphere. The resulting catalyst system was stirred in 1,4-dioxane (degassed) (1.5 mL) for 30 minutes. After that, **1** (0.1 mmol), **2** (0.25 mmol), Yb(OTf)<sub>3</sub> (0.0062 g, 0.01 mmol, 10 mol%), DMAP (0.05 mmol, 50 mol%) and Cs<sub>2</sub>CO<sub>3</sub> (0.1 mmol, 1.0 equiv.) were added under argon atmosphere. The reaction mixture was stirred at 45 °C for 12 h. The reaction solution was filtered through a pad of celite to remove insoluble solids. Then, the solvent was evaporated under vacuum and the residue was purified by a column chromatography to afford the desired product **4**.

### (E) The General Procedure for the Scale-up Synthesis of Compounds **3a** and **4a**

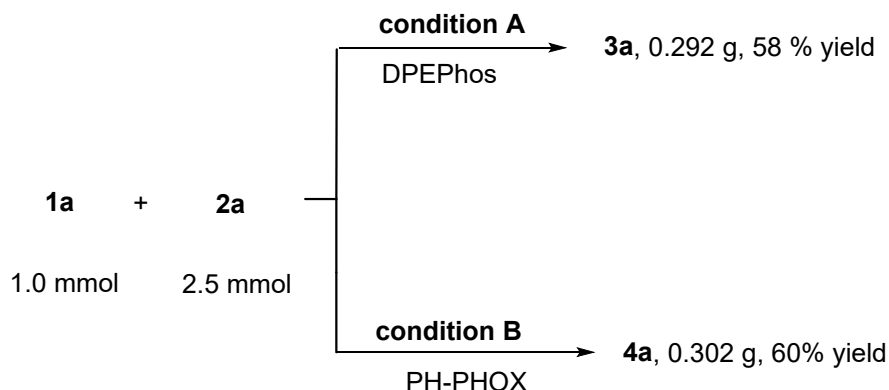

Tris(dibenzylideneacetone)dipalladium (0.023 g, 0.02 mmol, 2.5 mol%), 4Å MS (1.0 g) and DPEphos (0.040 g, 0.07 mmol, 7.5 mol%) was added to an oven dried 10 mL sealed tube equipped with a magnetic stirring bar under argon atmosphere. The resulting catalyst system was stirred in MeCN (degassed) (15 mL) for 30 minutes. After that, **1a** (0.294 g, 1.0 mmol), **2a** (430  $\mu$ L, 2.5 mmol), Yb(OTf)<sub>3</sub> (0.062 g, 0.1 mmol, 10 mol%), DMAP (0.061 g, 0.5 mmol, 50 mol%) and Cs<sub>2</sub>CO<sub>3</sub> (0.325 g, 1.0 mmol, 1.0 equiv.) were added under argon atmosphere. The reaction mixture was stirred at 45 °C for 12 h. The reaction solution was filtered through a pad of celite to remove insoluble solids. Then, the solvent was evaporated under vacuum and the residue was purified by a column chromatography to afford the desired product **3a**.

Tris(dibenzylideneacetone)dipalladium (0.023 g, 0.02 mmol, 2.5 mol%), 4Å MS (1.0 g) and Ph-PHOX (0.030 g, 0.07 mmol, 7.5 mol%) was added to an oven dried 10 mL sealed tube equipped with a magnetic stirring bar under argon atmosphere. The resulting catalyst system was stirred in 1,4-dioxane (degassed) (15 mL) for 30 minutes. After that, **1a** (0.294 g, 1.0 mmol), **2a** (430  $\mu$ L, 2.5 mmol), Yb(OTf)<sub>3</sub> (0.062 g, 0.1 mmol, 10 mol%), DMAP (0.061 g, 0.5 mmol, 50 mol%) and Cs<sub>2</sub>CO<sub>3</sub> (0.325 g, 1.0 mmol, 1.0 equiv.) were added under argon atmosphere. The reaction mixture was stirred at 45 °C for 12 h. The reaction solution was filtered through a pad of celite to remove insoluble solids. Then, the solvent was evaporated under vacuum and the residue was purified by a column chromatography to afford the desired product **4a**.



## (F) Optimization of Reaction Conditions

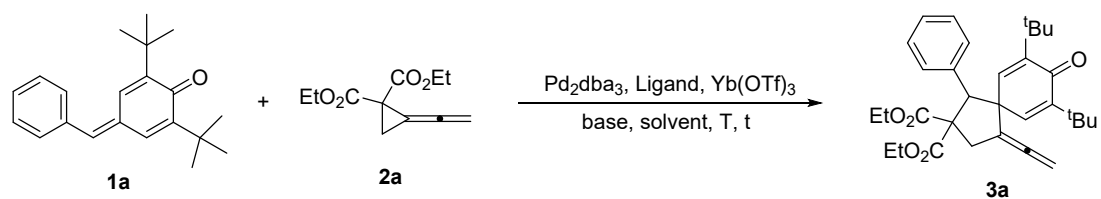

| entry <sup>a</sup> | 2a (equiv) | [Pd]                               | ligand   | solvent | base                            | DMAP (mol%) | T °C | t (h) | yield <sup>b</sup> (%) |
|--------------------|------------|------------------------------------|----------|---------|---------------------------------|-------------|------|-------|------------------------|
| 1                  | 2.5        | Pd <sub>2</sub> dba <sub>3</sub>   | DPEphos  | THF     | Cs <sub>2</sub> CO <sub>3</sub> | -           | 40   | 22    | 29                     |
| 2                  | 2.5        | Pd <sub>2</sub> dba <sub>3</sub>   | DPEphos  | THF     | Cs <sub>2</sub> CO <sub>3</sub> | -           | 45   | 22    | 46                     |
| 3                  | 2.5        | Pd <sub>2</sub> dba <sub>3</sub>   | DPEphos  | THF     | Cs <sub>2</sub> CO <sub>3</sub> | -           | 50   | 22    | 36                     |
| 4                  | 2.5        | Pd <sub>2</sub> dba <sub>3</sub>   | DPEphos  | THF     | Cs <sub>2</sub> CO <sub>3</sub> | -           | 55   | 22    | 31                     |
| 5                  | 2.5        | Pd <sub>2</sub> dba <sub>3</sub>   | DPEphos  | THF     | Cs <sub>2</sub> CO <sub>3</sub> | -           | 60   | 22    | 28                     |
| 6                  | 2.5        | Pd <sub>2</sub> dba <sub>3</sub>   | DPEphos  | THF     | Cs <sub>2</sub> CO <sub>3</sub> | -           | 65   | 22    | 24                     |
| 7                  | 1.0        | Pd <sub>2</sub> dba <sub>3</sub>   | DPEphos  | THF     | Cs <sub>2</sub> CO <sub>3</sub> | -           | 45   | 12    | 11                     |
| 8                  | 2.0        | Pd <sub>2</sub> dba <sub>3</sub>   | DPEphos  | THF     | Cs <sub>2</sub> CO <sub>3</sub> | -           | 45   | 12    | 44                     |
| 9                  | 3.0        | Pd <sub>2</sub> dba <sub>3</sub>   | DPEphos  | THF     | Cs <sub>2</sub> CO <sub>3</sub> | -           | 45   | 12    | 27                     |
| 10                 | 2.5        | Pd <sub>2</sub> dba <sub>3</sub>   | DPEphos  | THF     | Cs <sub>2</sub> CO <sub>3</sub> | 30          | 45   | 12    | 64                     |
| 11                 | 2.5        | Pd <sub>2</sub> dba <sub>3</sub>   | DPEphos  | THF     | Cs <sub>2</sub> CO <sub>3</sub> | 50          | 45   | 12    | 68                     |
| 12                 | 2.5        | Pd <sub>2</sub> dba <sub>3</sub>   | DPEphos  | THF     | Cs <sub>2</sub> CO <sub>3</sub> | 70          | 45   | 12    | 52                     |
| 13                 | 2.5        | Pd <sub>2</sub> dba <sub>3</sub>   | DPEphos  | Acetone | Cs <sub>2</sub> CO <sub>3</sub> | 50          | 45   | 12    | 51                     |
| 14                 | 2.5        | Pd <sub>2</sub> dba <sub>3</sub>   | DPEphos  | Dioxane | Cs <sub>2</sub> CO <sub>3</sub> | 50          | 45   | 12    | 45                     |
| 15                 | 2.5        | Pd <sub>2</sub> dba <sub>3</sub>   | DPEphos  | MeCN    | Cs <sub>2</sub> CO <sub>3</sub> | 50          | 45   | 12    | 85                     |
| 16                 | 2.5        | Pd <sub>2</sub> dba <sub>3</sub>   | DPEphos  | Toluene | Cs <sub>2</sub> CO <sub>3</sub> | 50          | 45   | 12    | 27                     |
| 17                 | 2.5        | Pd <sub>2</sub> dba <sub>3</sub>   | DPEphos  | DCE     | Cs <sub>2</sub> CO <sub>3</sub> | 50          | 45   | 12    | 44                     |
| 18                 | 2.5        | Pd <sub>2</sub> dba <sub>3</sub>   | DPEphos  | DMF     | Cs <sub>2</sub> CO <sub>3</sub> | 50          | 45   | 12    | 57                     |
| 19                 | 2.5        | Pd <sub>2</sub> dba <sub>3</sub>   | DPEphos  | DMSO    | Cs <sub>2</sub> CO <sub>3</sub> | 50          | 45   | 12    | 82                     |
| 20                 | 2.5        | Pd <sub>2</sub> dba <sub>3</sub>   | Binap    | MeCN    | Cs <sub>2</sub> CO <sub>3</sub> | 50          | 45   | 12    | 55                     |
| 21                 | 2.5        | Pd <sub>2</sub> dba <sub>3</sub>   | dppe     | MeCN    | Cs <sub>2</sub> CO <sub>3</sub> | 50          | 45   | 12    | trace                  |
| 22                 | 2.5        | Pd <sub>2</sub> dba <sub>3</sub>   | Xantphos | MeCN    | Cs <sub>2</sub> CO <sub>3</sub> | 50          | 45   | 12    | 32                     |
| 23                 | 2.5        | Pd <sub>2</sub> dba <sub>3</sub>   | DPEphos  | MeCN    | DBU                             | 50          | 45   | 12    | 54                     |
| 24                 | 2.5        | Pd <sub>2</sub> dba <sub>3</sub>   | DPEphos  | MeCN    | TEA                             | 50          | 45   | 12    | 20                     |
| 25                 | 2.5        | Pd <sub>2</sub> dba <sub>3</sub>   | DPEphos  | MeCN    | KH <sub>2</sub> PO <sub>4</sub> | 50          | 45   | 12    | trace                  |
| 26                 | 2.5        | Pd(OAc) <sub>2</sub>               | DPEphos  | MeCN    | Cs <sub>2</sub> CO <sub>3</sub> | 50          | 45   | 12    | 77                     |
| 27                 | 2.5        | Pd(PPh <sub>3</sub> ) <sub>4</sub> | DPEphos  | MeCN    | Cs <sub>2</sub> CO <sub>3</sub> | 50          | 45   | 12    | 79                     |

(a) Reaction conditions: a solution of **1a** (0.1 mmol) and **2a** (0.25 mmol), [Pd] (5.0 mol%), ligand (7.5 mol%), 4Å MS (100 mg), Yb(OTf)<sub>3</sub> (10.0 mol%) and base (0.1 mmol) in solvent (1.5 mL) was heated at 45 °C for 12 h. (b) isolated yield.

**Scheme S1.** Optimization of the reaction conditions for the synthesis of **3a**

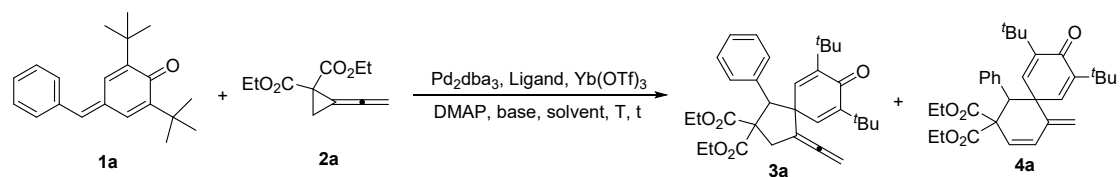

| entry <sup>a</sup> | <b>2a</b> (equiv) | solvent     | base                            | T (°C) | t (h) | total yield <sup>b</sup> (%) | <b>3a:4a</b> , yield <sup>b</sup> (%) |
|--------------------|-------------------|-------------|---------------------------------|--------|-------|------------------------------|---------------------------------------|
| 1                  | 2.5               | THF         | Cs <sub>2</sub> CO <sub>3</sub> | 45     | 12    | 84                           | 21 : 63                               |
| 2                  | 2.5               | MeCN        | Cs <sub>2</sub> CO <sub>3</sub> | 45     | 12    | 88                           | 24 : 64                               |
| 3                  | 2.5               | 1,4-dioxane | Cs <sub>2</sub> CO <sub>3</sub> | 45     | 12    | 97                           | 23 : 74                               |
| 4                  | 2.5               | DMF         | Cs <sub>2</sub> CO <sub>3</sub> | 45     | 12    | 91                           | 24 : 67                               |
| 5                  | 2.5               | DCM         | Cs <sub>2</sub> CO <sub>3</sub> | 45     | 12    | 95                           | 28 : 67                               |
| 6                  | 2.5               | Toluene     | Cs <sub>2</sub> CO <sub>3</sub> | 45     | 12    | 91                           | 35 : 56                               |
| 7                  | 2.5               | DMSO        | Cs <sub>2</sub> CO <sub>3</sub> | 45     | 12    | 73                           | 26 : 47                               |
| 8                  | 2.5               | DCE         | Cs <sub>2</sub> CO <sub>3</sub> | 45     | 12    | 34                           | 7 : 27                                |
| 9                  | 2.5               | 1,4-dioxane | Cs <sub>2</sub> CO <sub>3</sub> | 55     | 12    | 91                           | 28 : 63                               |
| 10                 | 2.5               | 1,4-dioxane | Cs <sub>2</sub> CO <sub>3</sub> | 65     | 12    | 85                           | 27 : 58                               |

(a) Reaction conditions: a solution of **1a** (0.1 mmol) and **2a** (0.25 mmol), [Pd] (5.0 mol%), PH-PHOX (7.5 mol%), Yb(OTf)<sub>3</sub> (10.0 mol%), 4Å MS (100 mg), DMAP (50 mol%) and base (0.1 mmol) in solvent (1.5 mL). (b) yields were determined by <sup>1</sup>H NMR using dibromomethane as an internal standard.

**Scheme S2.** Optimization of the reaction conditions for the synthesis of **4a**

### (G) Reaction of Unreactive Substrate

DPEphos as ligand:

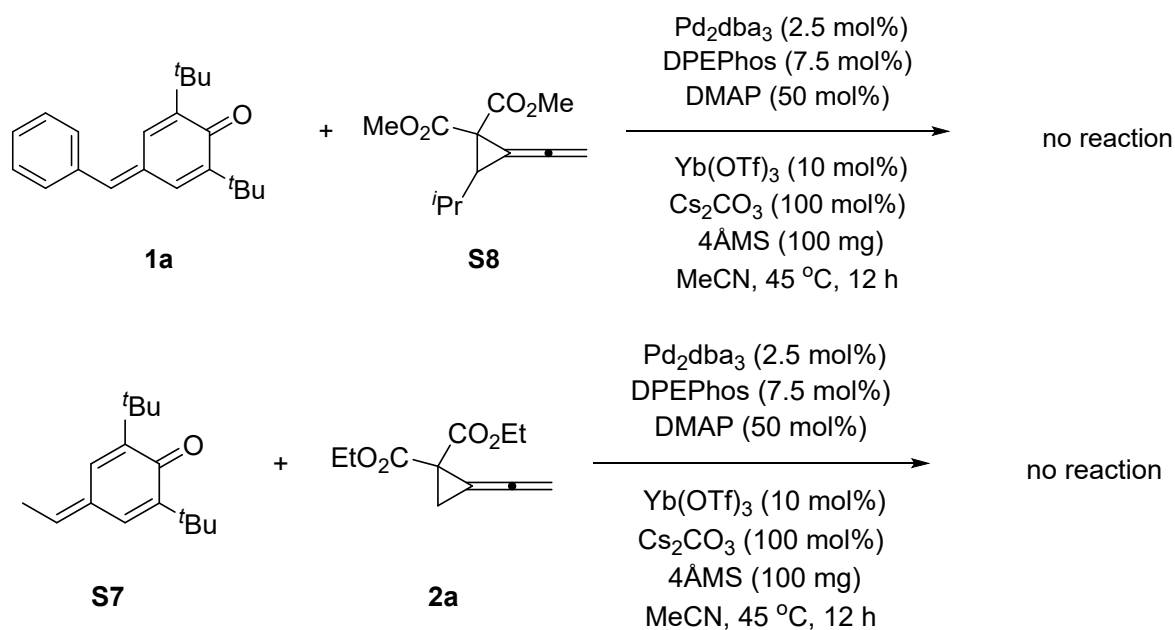

Ph-PHOX as ligand:

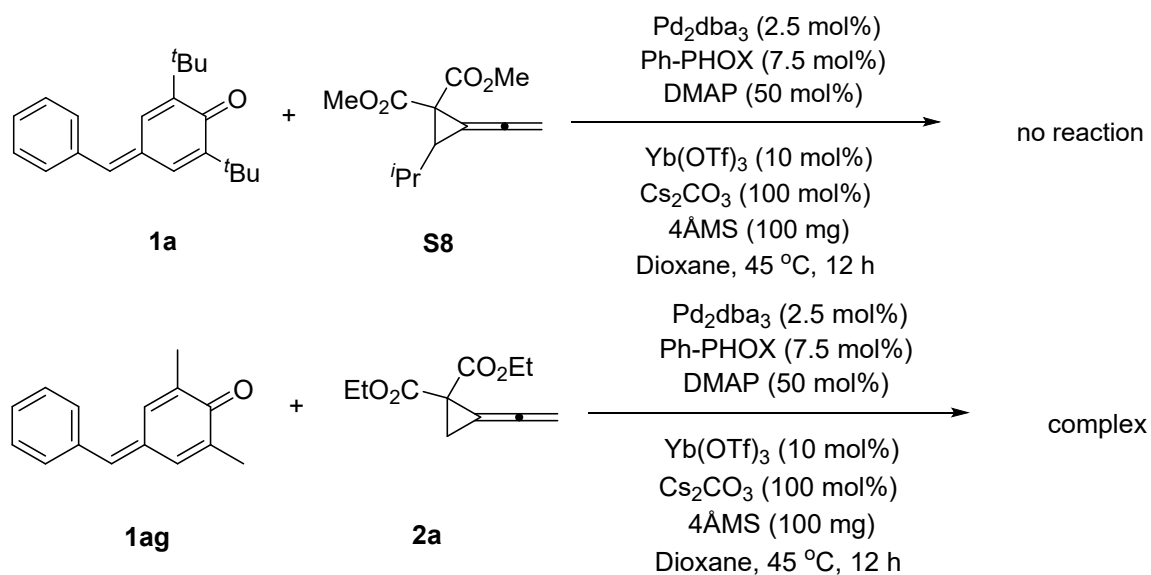

**Scheme S3.** Reactions that fail to obtain the target product

## (H) Control Experiments

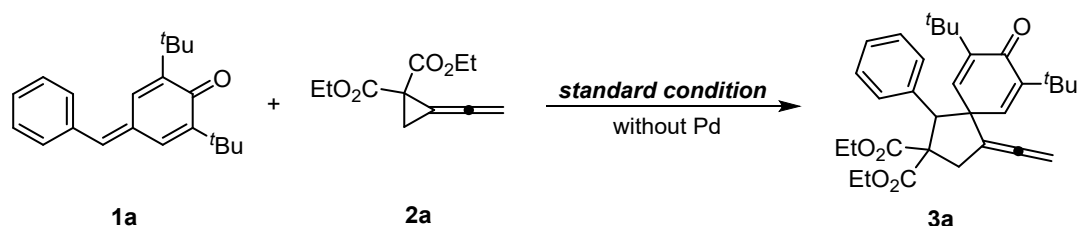

4Å MS (100 mg) and DPEphos (0.004 g, 0.007 mmol, 7.5 mol%) was added to an oven dried 10 mL sealed tube equipped with a magnetic stirring bar under argon atmosphere. The resulting catalyst system was stirred in MeCN (degassed) (1.5 mL) for 30 minutes. After that, **1a** (0.029 g, 0.1 mmol), **2a** (43 μL, 0.25 mmol), Yb(OTf)<sub>3</sub> (0.006 g, 0.01 mmol, 10 mol%), DMAP (0.006 g, 0.05 mmol, 50 mol%) and Cs<sub>2</sub>CO<sub>3</sub> (0.1 mmol, 1.0 equiv) were added under argon atmosphere. The reaction mixture was stirred at 45 °C for 12 h. The reaction solution was filtered through a pad of celite to remove insoluble solids. Trace of the desired product **3a** was generated through TLC detection.

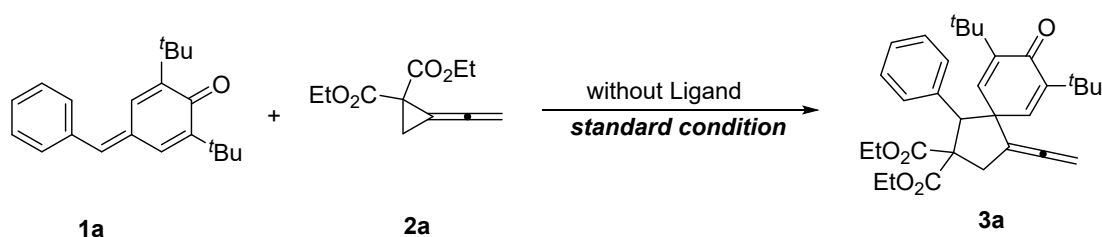

Tris(dibenzylideneacetone)dipalladium (0.002 g, 0.002 mmol, 2.5 mol%) and 4Å MS (100 mg) was added to an oven dried 10 mL sealed tube equipped with a magnetic stirring bar under argon atmosphere. The resulting catalyst system was stirred in MeCN (degassed) (1.5 mL) for 30 minutes. After that, **1a** (0.029 g, 0.1 mmol), **2a** (43 μL, 0.25 mmol), Yb(OTf)<sub>3</sub> (0.006 g, 0.01 mmol, 10 mol%), DMAP (0.006 g, 0.05 mmol, 50 mol%) and Cs<sub>2</sub>CO<sub>3</sub> (0.033 g, 0.1 mmol, 1.0 equiv.) were added under argon atmosphere. The reaction mixture was stirred at 45 °C for 12 h. The reaction solution was filtered through a pad of celite to remove insoluble solids. Then, the solvent was evaporated under vacuum and **3a** was afforded by a column chromatography in the yield of 14%.

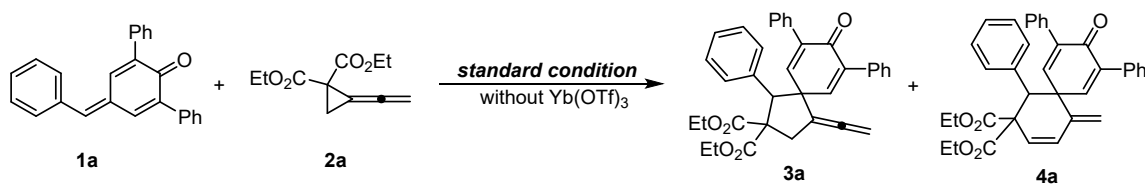

Tris(dibenzylideneacetone)dipalladium (0.002 g, 0.002 mmol, 2.5 mol%), PH-PHOX (0.030 g, 0.07 mmol, 7.5 mol%) and 4Å MS (100 mg) were added to an oven dried 10 mL sealed tube equipped with a magnetic stirring bar under argon atmosphere. The resulting catalyst system was stirred in 1,4-dioxane (degassed) (1.5 mL) for 30 minutes. After that, **1a** (0.029 g, 0.1 mmol), **2a** (43 μL, 0.25 mmol), DMAP (0.006 g, 0.05 mmol, 50 mol%) and Cs<sub>2</sub>CO<sub>3</sub> (0.033 g, 0.1 mmol, 1.0 equiv) were added under argon atmosphere. The reaction mixture was stirred at 45 °C for 12 h. The reaction solution was filtered through a pad of celite to remove insoluble solids. Then, the solvent was evaporated under vacuum and **3a** : **4a** was afforded by <sup>1</sup>H NMR using dibromomethane as an internal standard in the yield of 20 : 48.

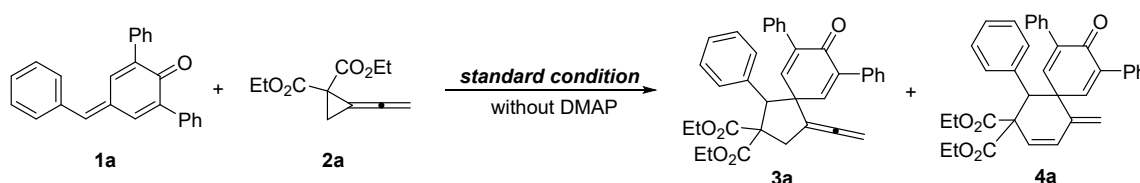

Tris(dibenzylideneacetone)dipalladium (0.002 g, 0.002 mmol, 2.5 mol%), PH-PHOX (0.030 g, 0.07 mmol, 7.5 mol%) and 4Å MS (100 mg) were added to an oven dried 10 mL sealed tube equipped with a magnetic stirring bar under argon atmosphere. The resulting catalyst system was stirred in 1,4-dioxane (degassed) (1.5 mL) for 30 minutes. After that, **1a** (0.029 g, 0.1 mmol), **2a** (43 μL, 0.25 mmol), Yb(OTf)<sub>3</sub> (0.006 g, 0.01 mmol, 10 mol%) and Cs<sub>2</sub>CO<sub>3</sub> (0.033 g, 0.1 mmol, 1.0 equiv) were added under argon atmosphere. The reaction mixture was stirred at 45 °C for 12 h. The reaction solution was filtered through a pad of celite to remove insoluble solids. Then, the solvent was evaporated under vacuum and **3a** : **4a** was afforded by <sup>1</sup>H NMR using dibromomethane as an internal standard in the yield of 14 : 32.

## (I) Asymmetric Variant

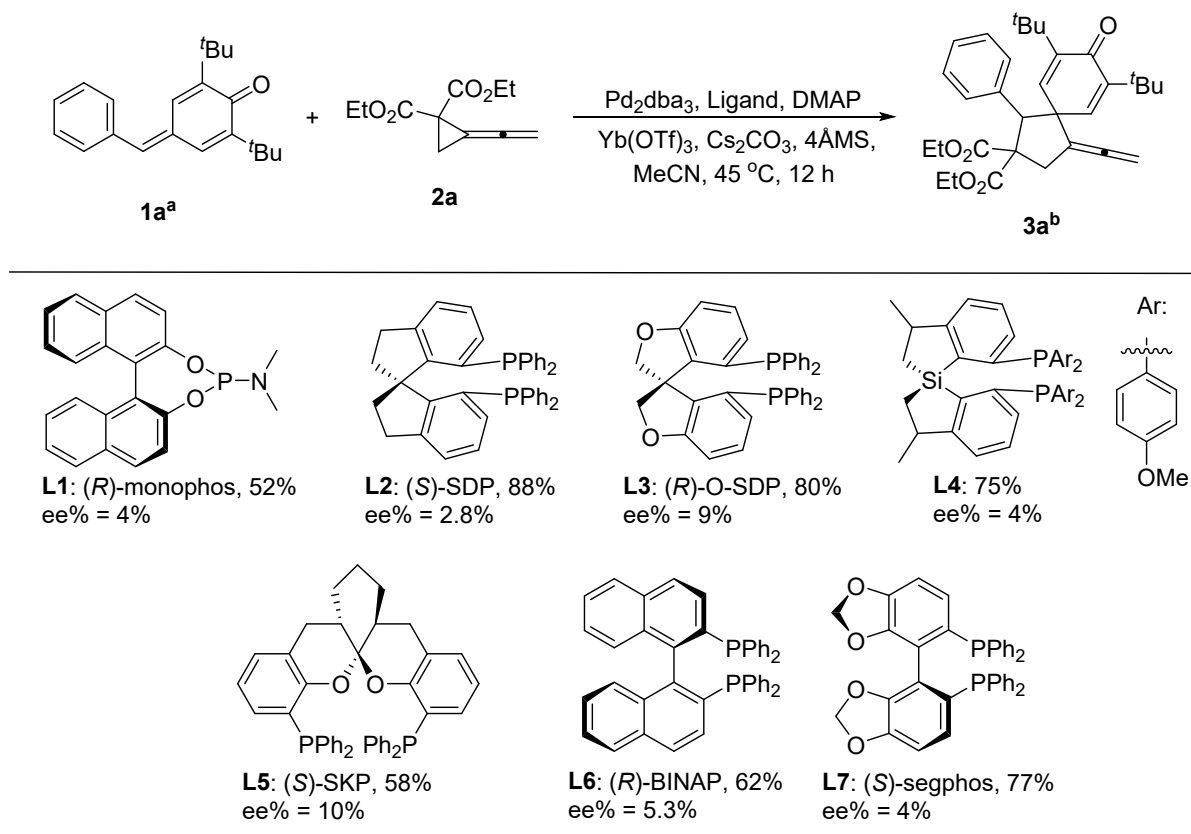

(a) Reaction conditions: a solution of **1a** (0.1 mmol) and **2a** (0.2 mmol), Pd<sub>2</sub>dba<sub>3</sub> (2.5 mol%), ligand (7.5 mol%), Yb(OTf)<sub>3</sub> (10.0 mol%), 4Å MS (100 mg), DMAP (50.0 mol%) and base (0.1 mmol) in solvent (1.5 mL) was heated at 45 °C for 12 h. (b) isolated yield.

### Scheme S4. Optimization of asymmetric synthesis of **3a**

Tris(dibenzylideneacetone)dipalladium (0.002 g, 0.002 mmol, 2.5 mol%) and ligand (0.007 mmol, 7.5 mol%) were added to an oven dried 10 mL sealed tube equipped with a magnetic stirring bar under argon atmosphere. The resulting catalyst system was stirred in MeCN (degassed) (1.5 mL) for 30 min. After that, **1a** (0.029 g, 0.1 mmol), **2a** (43 μL, 0.25 mmol), Yb(OTf)<sub>3</sub> (0.006 g, 0.01 mmol, 10 mol%), DMAP (0.006 g, 50 mol%) and Cs<sub>2</sub>CO<sub>3</sub> (0.033 g, 0.1 mmol, 1.0 equiv) were added under argon atmosphere. The reaction mixture was stirred at 45 °C for 12 h. The reaction solution was filtered through a pad of celite to remove insoluble solids. Then, the solvent was evaporated under vacuum and **3a** was afforded by a column chromatography. The ee was determined by HPLC using a Chiralpak OD-H column [*n*-hexane/*i*-PrOH (99 : 1)]; flow rate 0.7 mL/min.

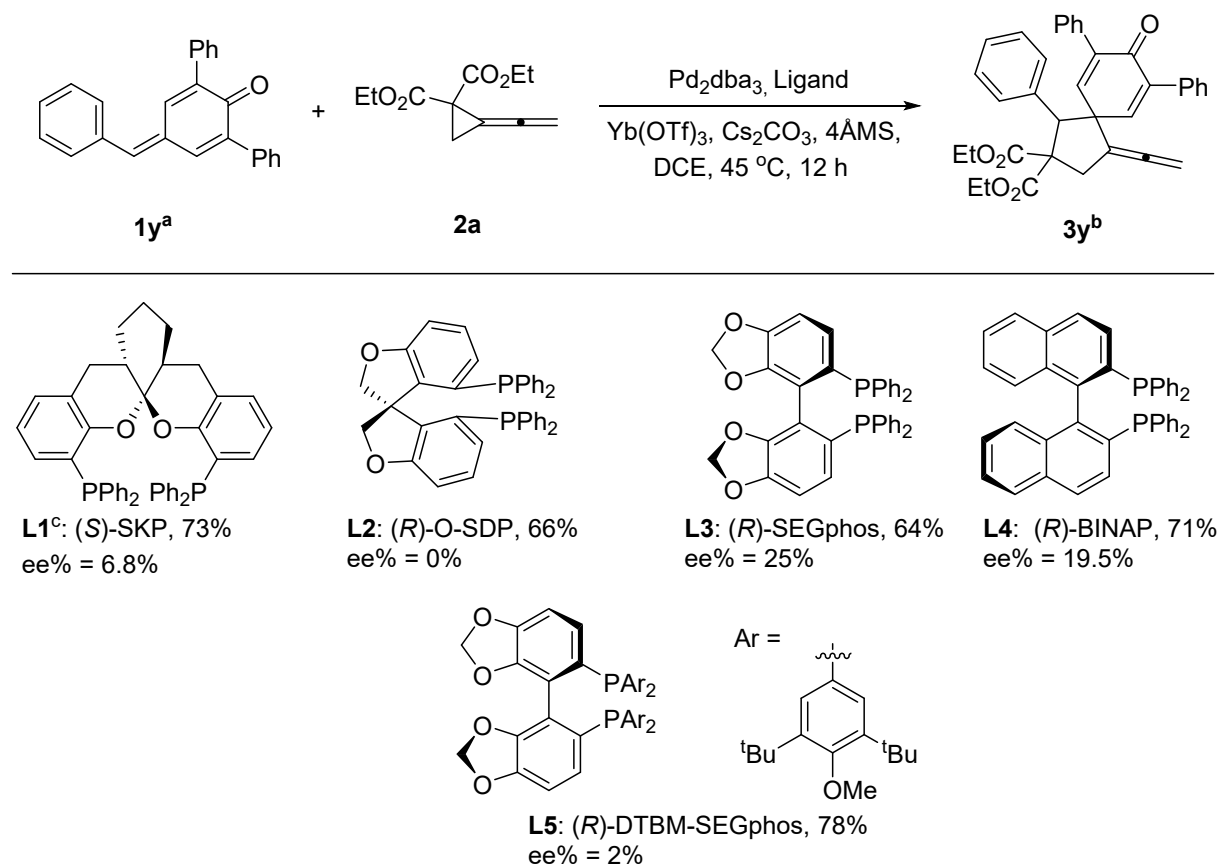

(a) Reaction conditions: a solution of **1a** (0.1 mmol) and **2a** (0.2 mmol), Pd<sub>2</sub>dba<sub>3</sub> (2.5 mol%), ligand (7.5 mol%), Yb(OTf)<sub>3</sub> (10.0 mol%), 4Å MS (100 mg) and base (0.1 mol) in solvent (1.5 mL) was heated at 45 °C for 12 h. (b) isolated yield. (c) DMF as solvent.

### Scheme S5. Optimization of asymmetric synthesis of **3y**

Tris(dibenzylideneacetone)dipalladium (0.002 g, 0.002 mmol, 2.5 mol%) and ligand (0.007 mmol, 7.5 mol%) were added to an oven dried 10 mL sealed tube equipped with a magnetic stirring bar under argon atmosphere. The resulting catalyst system was stirred in solvent (degassed) (1.5 mL) for 30 min. After that, **1y** (0.033 g, 0.1 mmol), **2a** (43 μL, 0.25 mmol), Yb(OTf)<sub>3</sub> (0.006 g, 0.01 mmol, 10 mol%) and Cs<sub>2</sub>CO<sub>3</sub> (0.033 g, 0.1 mmol, 1.0 equiv) were added under argon atmosphere. The reaction mixture was stirred at 45 °C for 12 h. The reaction solution was filtered through a pad of celite to remove insoluble solids. Then, the solvent was evaporated under vacuum and **3y** was afforded by a column chromatography. The ee was determined by HPLC using a Chiralpak IC column [*n*-hexane/*i*-PrOH (60 : 4)]; flow rate 0.7 mL/min.

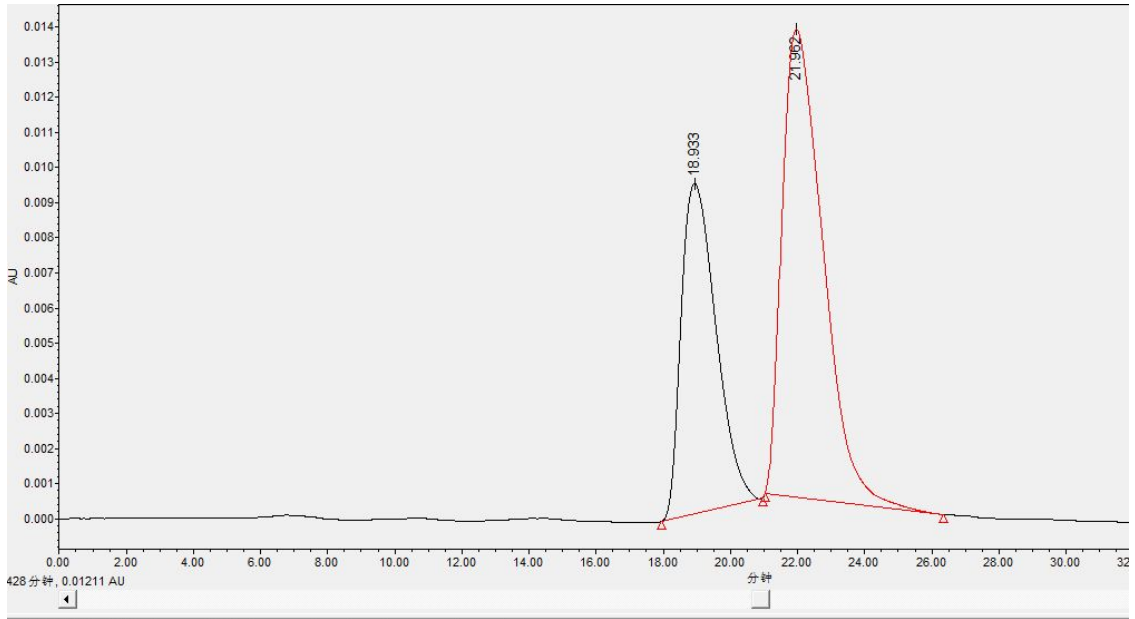

| 名称 | 保留时间 (分钟) | 面积 (微伏秒) | % 面积  | 高度 (微伏) | 积分类型 | 含量 | 单位 | 峰类型 | 峰代码 |
|----|-----------|----------|-------|---------|------|----|----|-----|-----|
|    | 18.933    | 681170   | 37.60 | 9406    | bb   |    |    | 未知  |     |
|    | 21.962    | 1130257  | 62.40 | 13336   | bb   |    |    | 未知  |     |
|    |           |          |       |         |      |    |    |     |     |
|    |           |          |       |         |      |    |    |     |     |

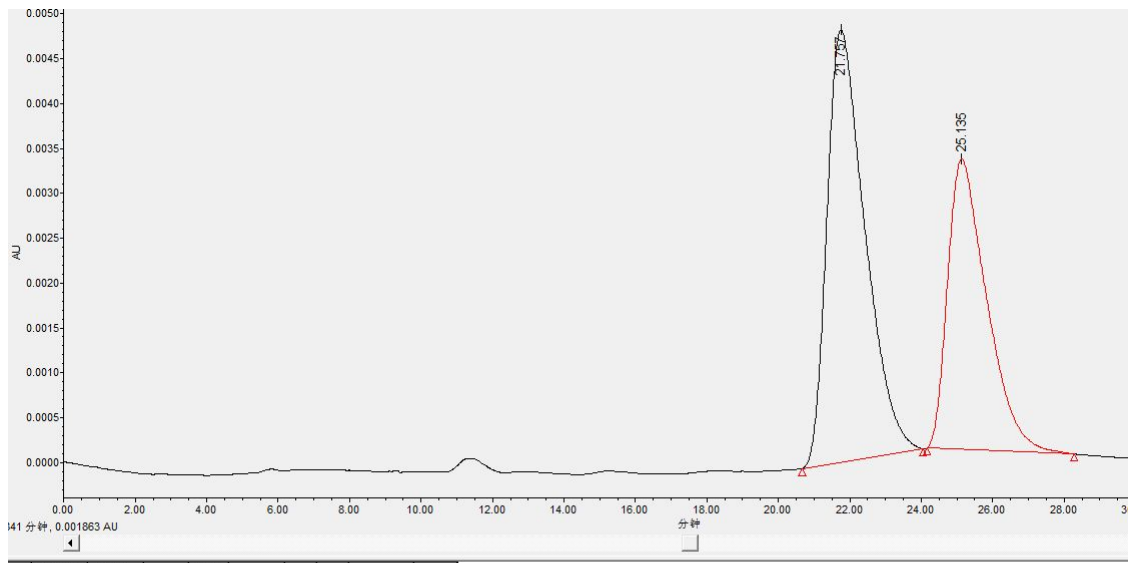

| 名称 | 保留时间 (分钟) | 面积 (微伏秒) | % 面积  | 高度 (微伏) | 积分类型 | 含量 | 单位 | 峰类型 | 峰代码 |
|----|-----------|----------|-------|---------|------|----|----|-----|-----|
|    | 21.757    | 356298   | 59.22 | 4819    | bb   |    |    | 未知  |     |
|    | 25.135    | 245385   | 40.78 | 3238    | bb   |    |    | 未知  |     |
|    |           |          |       |         |      |    |    |     |     |
|    |           |          |       |         |      |    |    |     |     |



## (J) Characterization Data of Substrates and Products

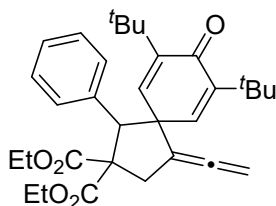

### diethyl 7,9-di-tert-butyl-8-oxo-1-phenyl-4-vinylidenespiro[4.5]deca-6,9-diene-2,2-dicarboxylate

**(3a)**: Yield: 0.0428 g, 85%, a colorless solid, m.p: 92-94 °C; Eluent: PE/EA = 30/1. <sup>1</sup>H NMR (400 MHz, CDCl<sub>3</sub>, TMS) δ 7.15 (m, 3H), 7.10 - 7.00 (m, 2H), 6.77 (d, *J* = 3.0 Hz, 1H), 6.52 (d, *J* = 3.0 Hz, 1H), 4.87 - 4.75 (m, 2H), 4.31 (s, 1H), 4.29 - 4.17 (m, 2H), 4.05 - 3.93 (m, 2H), 3.72 (dq, *J* = 10.8, 7.2 Hz, 1H), 3.14 (dt, *J* = 17.0, 3.0 Hz, 1H), 1.25 (t, *J* = 7.2 Hz, 3H), 1.11 (s, 9H), 1.09 (s, 9H), 0.81 (t, *J* = 7.2 Hz, 3H); <sup>13</sup>C{<sup>1</sup>H}-NMR (100 MHz, CDCl<sub>3</sub>, TMS) δ 201.6, 186.0, 171.6, 170.4, 147.0, 145.6, 142.3, 139.8, 136.0, 129.7, 127.4, 127.4, 103.8, 79.0, 67.9, 63.6, 62.0, 61.8, 61.7, 54.2, 37.7, 34.9, 34.6, 29.4, 29.1, 25.6, 14.0, 13.3; IR (neat): ν 2956.66, 2904.17, 2865.03, 1959.67, 1725.12, 1658.92, 1636.96, 1455.82, 1253.79, 1095.86, 822.02, 700.60 cm<sup>-1</sup>; HRMS (ESI-TOF) Calcd for C<sub>32</sub>H<sub>41</sub>O<sub>5</sub> [M+H]<sup>+</sup> : 505.2949, found: 505.2946.

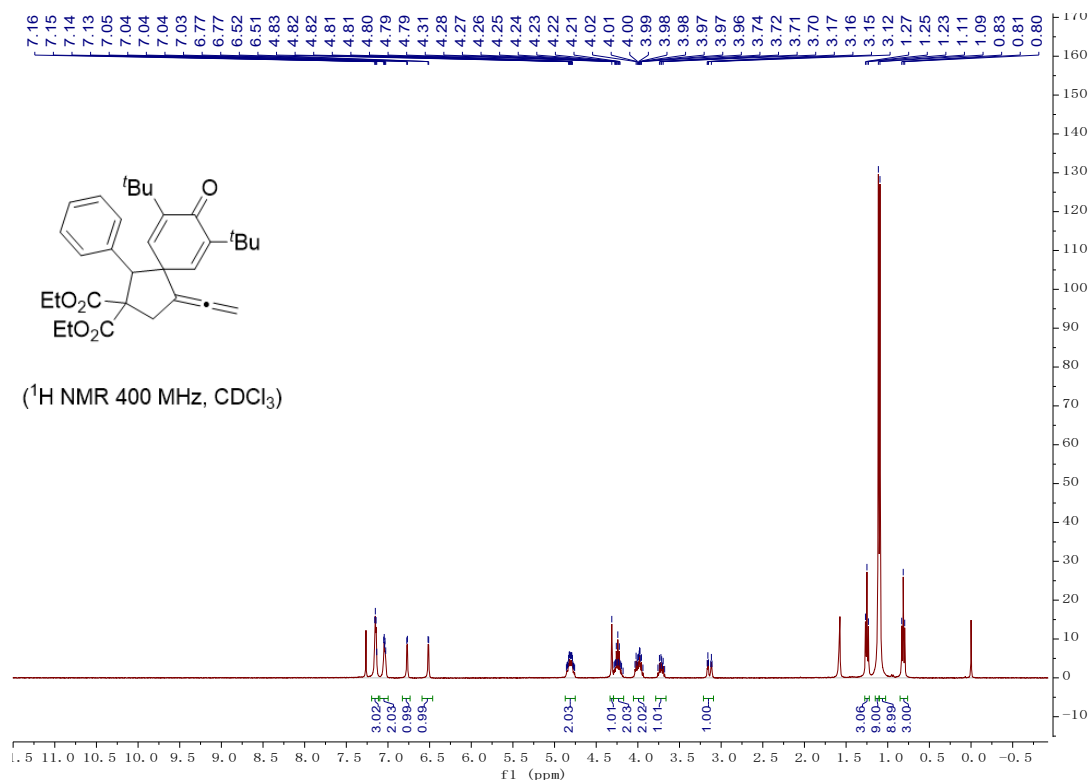

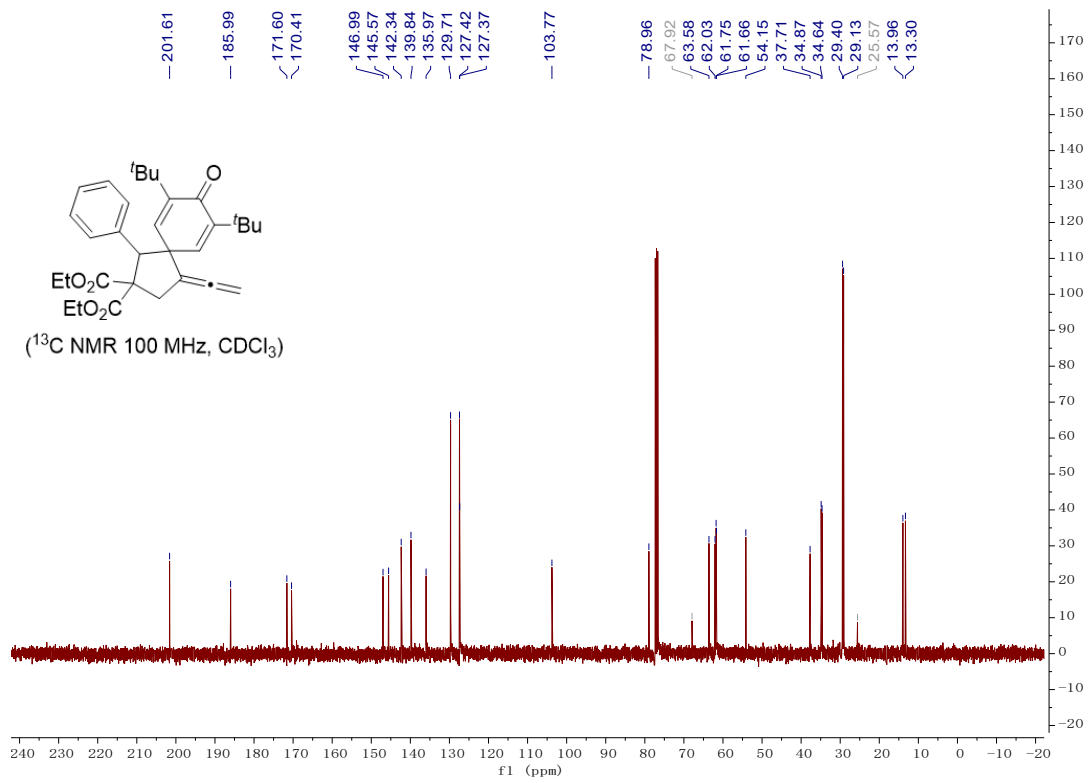

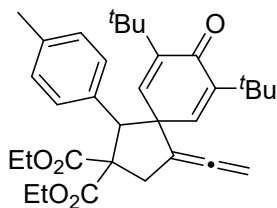

**diethyl 7,9-di-*tert*-butyl-8-oxo-1-(*p*-tolyl)-4-vinylidenespiro[4.5]deca-6,9-diene-2,2-dicarboxylate (3b):** Yield: 0.0368 g, 71%, a colorless oil; Eluent: PE/EA = 30/1.  $^1\text{H}$  NMR (400 MHz,  $\text{CDCl}_3$ , TMS)  $\delta$  6.99 – 6.90 (m, 4H), 6.80 (d,  $J = 3.0$  Hz, 1H), 6.50 (d,  $J = 3.0$  Hz, 1H), 4.86 – 4.74 (m, 2H), 4.29 – 4.18 (m, 3H), 4.05 – 3.93 (m, 2H), 3.72 (dq,  $J = 10.8, 7.2$  Hz, 1H), 3.11 (dt,  $J = 17.0, 3.2$  Hz, 1H), 2.23 (s, 3H), 1.24 (t,  $J = 7.2$  Hz, 3H), 1.11 (s, 9H), 1.11 (s, 9H), 0.85 (t,  $J = 7.2$  Hz, 3H);  $^{13}\text{C}$   $\{^1\text{H}\}$ -NMR (100 MHz,  $\text{CDCl}_3$ , TMS)  $\delta$  201.7, 186.2, 171.7, 170.6, 147.0, 145.5, 142.6, 140.0, 136.94, 132.8, 129.6, 128.1, 103.9, 78.9, 63.6, 62.0, 61.7, 61.5, 54.2, 37.8, 35.0, 34.7, 29.5, 29.2, 21.0, 14.0, 13.4; IR (neat):  $\nu$  2956.29, 2867.08, 1962.33, 1724.69, 1659.33, 1637.13, 1515.72, 1388.83, 1366.05, 1253.44, 1218.82, 1033.90, 882.33  $\text{cm}^{-1}$ ; HRMS (DART) Calcd for  $\text{C}_{33}\text{H}_{43}\text{O}_5$   $[\text{M}+\text{H}]^+$  : 519.3105, found: 519.3106.

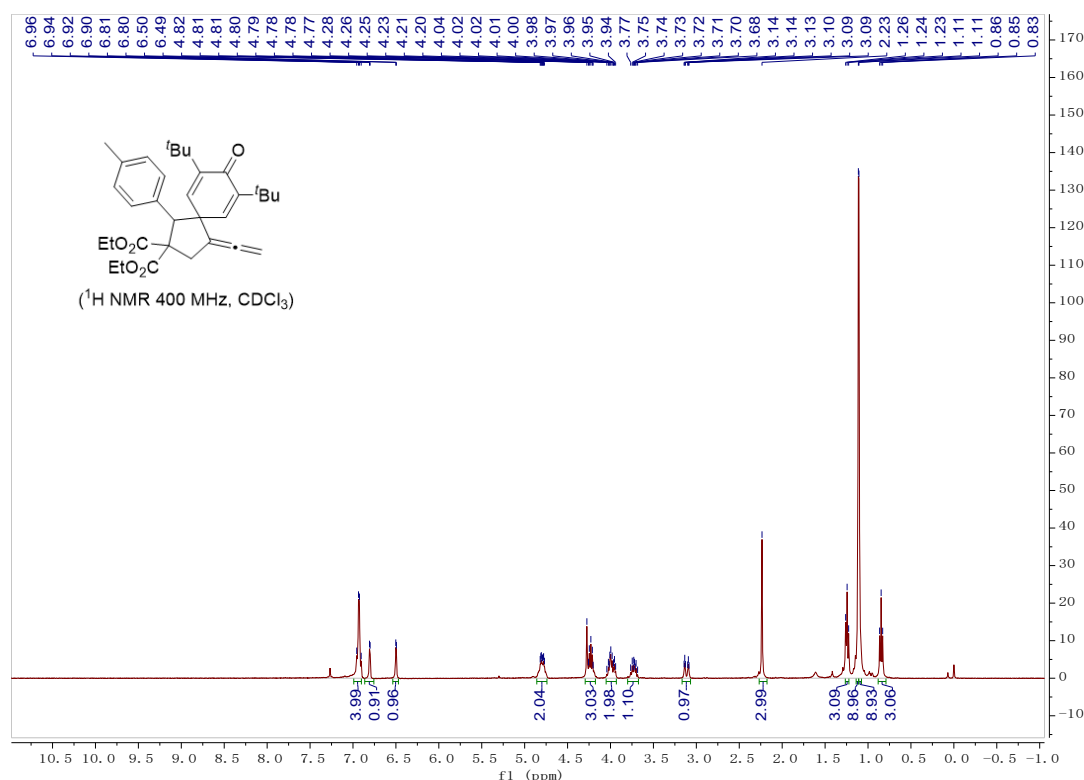

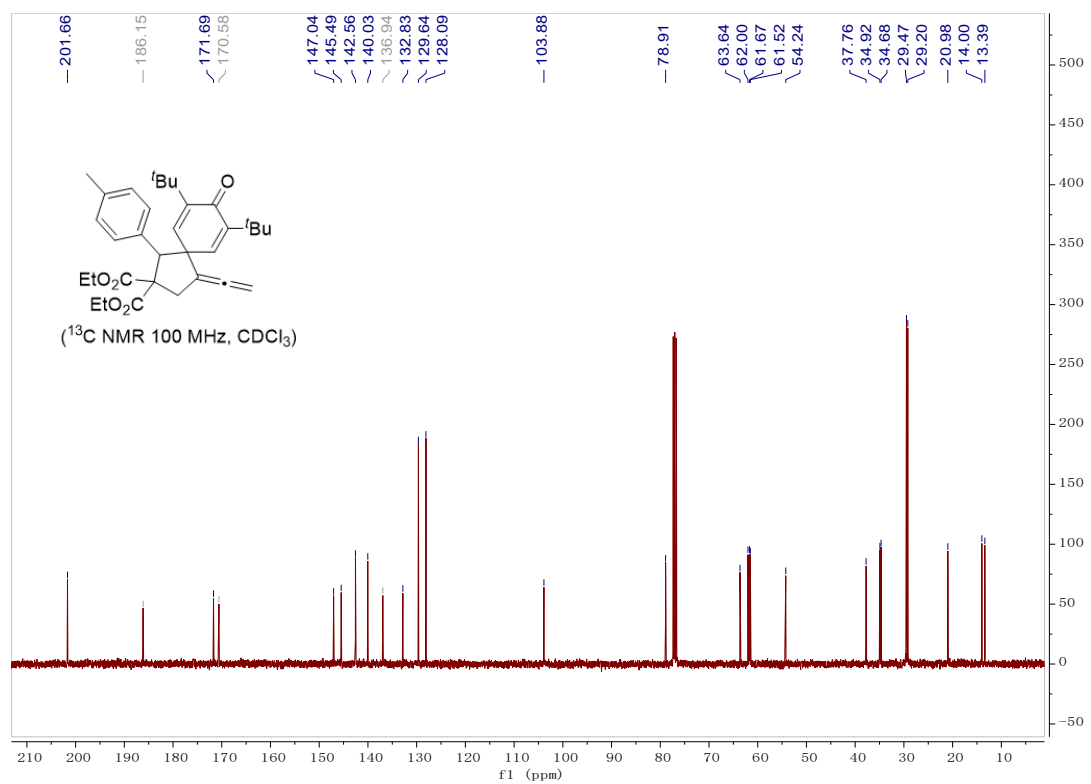

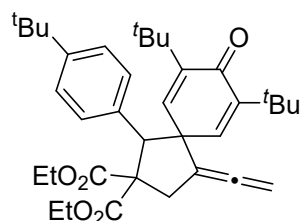

**diethyl 7,9-di-*tert*-butyl-1-(4-(*tert*-butyl)phenyl)-8-oxo-4-vinylidenespiro[4.5]deca-6,9-diene-2,2-dicarboxylate (3c):** Yield: 0.0409 g, 73%, a colorless oil; Eluent: PE/EA = 30/1.  $^1\text{H}$  NMR (400 MHz,  $\text{CDCl}_3$ , TMS)  $\delta$  7.12 (d,  $J = 8.2$  Hz, 2H), 6.92 (d,  $J = 8.2$  Hz, 2H), 6.68 (d,  $J = 2.8$  Hz, 1H), 6.50 (d,  $J = 2.8$  Hz, 1H), 4.82 – 4.72 (m, 2H), 4.29 – 4.16 (m, 3H), 4.01 – 3.87 (m, 2H), 3.74 (dq,  $J = 10.8, 7.2$  Hz, 1H), 3.10 (dt,  $J = 16.8, 3.2$  Hz, 1H), 1.22 (t,  $J = 7.2$  Hz, 3H), 1.19 (s, 9H), 1.09 (s, 9H), 1.04 (s, 9H), 0.73 (t,  $J = 7.2$  Hz, 3H);  $^{13}\text{C}\{^1\text{H}\}$ -NMR (100 MHz,  $\text{CDCl}_3$ , TMS)  $\delta$  201.6, 186.0, 171.7, 170.4, 150.2, 146.7, 145.3, 142.5, 140.3, 133.0, 129.3, 124.3, 103.8, 78.9, 63.6, 62.0, 61.6, 61.2, 54.1, 37.9, 34.8, 34.7, 34.3, 31.2, 29.4, 29.1, 14.0, 13.2; IR (neat):  $\nu$  2957.90, 2906.78, 2865.03, 1962.28, 1726.50, 1659.23, 1636.95, 1366.10, 1253.47, 1030.84, 857.90, 732.29  $\text{cm}^{-1}$ ; HRMS (ESI-TOF) Calcd for  $\text{C}_{36}\text{H}_{49}\text{O}_5$   $[\text{M}+\text{H}]^+$  : 561.3575, found: 561.3571.

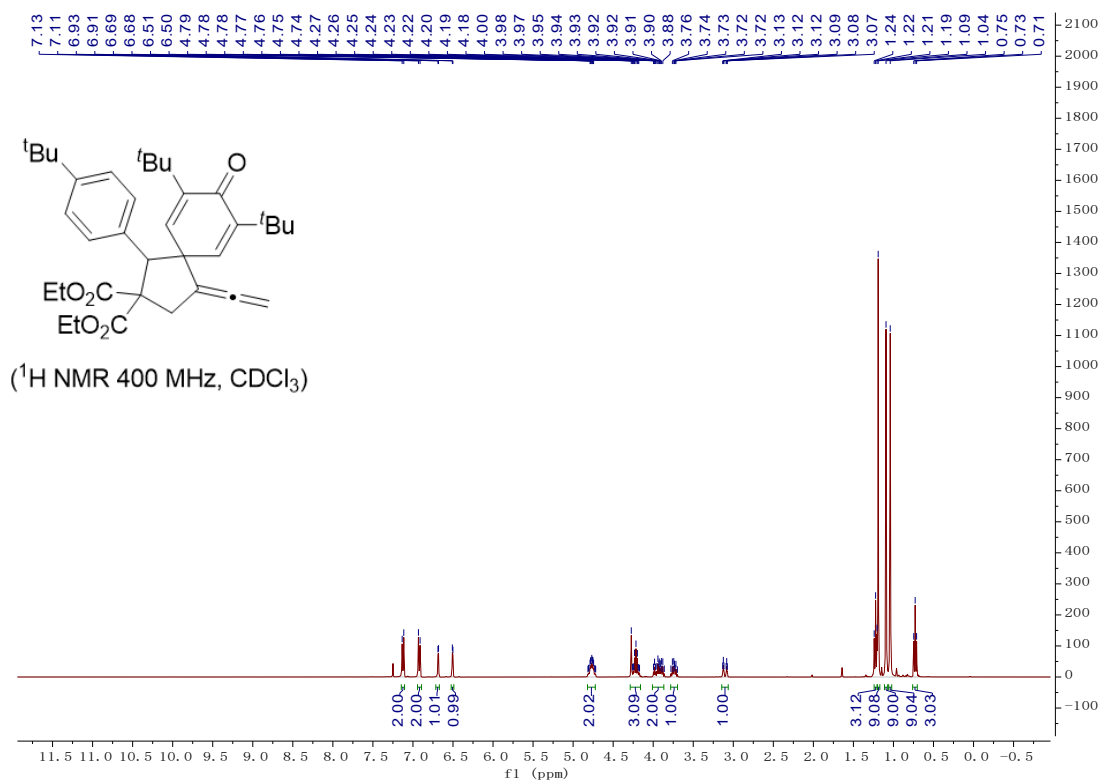

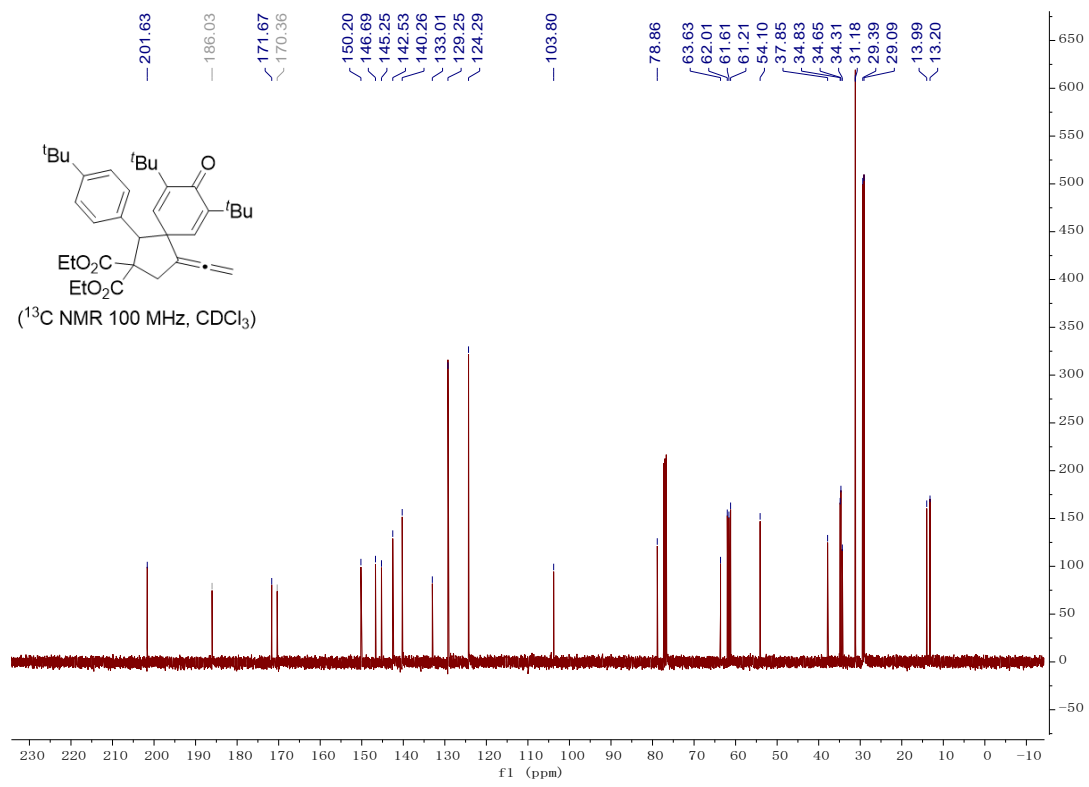

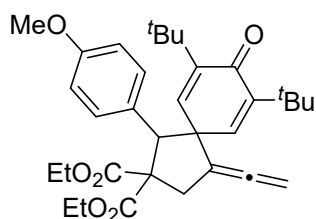

**diethyl 7,9-di-*tert*-butyl-1-(4-methoxyphenyl)-8-oxo-4-vinylidenespiro[4.5]deca-6,9-diene-2,2-dicarboxylate (3d):** Yield: 0.0395 g, 74%, a colorless oil; Eluent: PE/EA = 30/1.  $^1\text{H}$  NMR (400 MHz,  $\text{CDCl}_3$ , TMS)  $\delta$  6.90 (d,  $J = 8.8$  Hz, 2H), 6.76 (d,  $J = 3.0$  Hz, 1H), 6.61 (d,  $J = 8.8$  Hz, 2H), 6.41 (d,  $J = 3.0$  Hz, 1H), 4.80 – 4.66 (m, 2H), 4.22 – 4.12 (m, 3H), 3.99 – 3.86 (m, 2H), 3.70 – 3.62 (m, 4H), 3.04 (dt,  $J = 17.0, 3.2$  Hz, 1H), 1.17 (t,  $J = 7.2$  Hz, 3H), 1.05 (s, 9H), 1.04 (s, 9H), 0.81 (t,  $J = 7.2$  Hz, 3H);  $^{13}\text{C}\{^1\text{H}\}$ -NMR (100 MHz,  $\text{CDCl}_3$ , TMS)  $\delta$  201.6, 186.1, 171.7, 170.7, 158.8, 147.2, 145.7, 142.6, 139.9, 131.0, 128.0, 112.8, 103.8, 78.9, 63.6, 62.0, 61.7, 61.2, 55.2, 54.3, 37.7, 35.0, 34.7, 29.5, 29.2, 14.0, 13.5; IR (neat):  $\nu$  2956.61, 2906.54, 2861.68, 1961.68, 1724.22, 1659.01, 1636.98, 1514.39, 1463.12, 1366.76, 1294.99, 1250.67, 1180.00, 1131.10, 822.19, 732.10  $\text{cm}^{-1}$ ; HRMS (DART) Calcd for  $\text{C}_{33}\text{H}_{43}\text{O}_6$   $[\text{M}+\text{H}]^+$  : 535.3054, found: 535.3066.

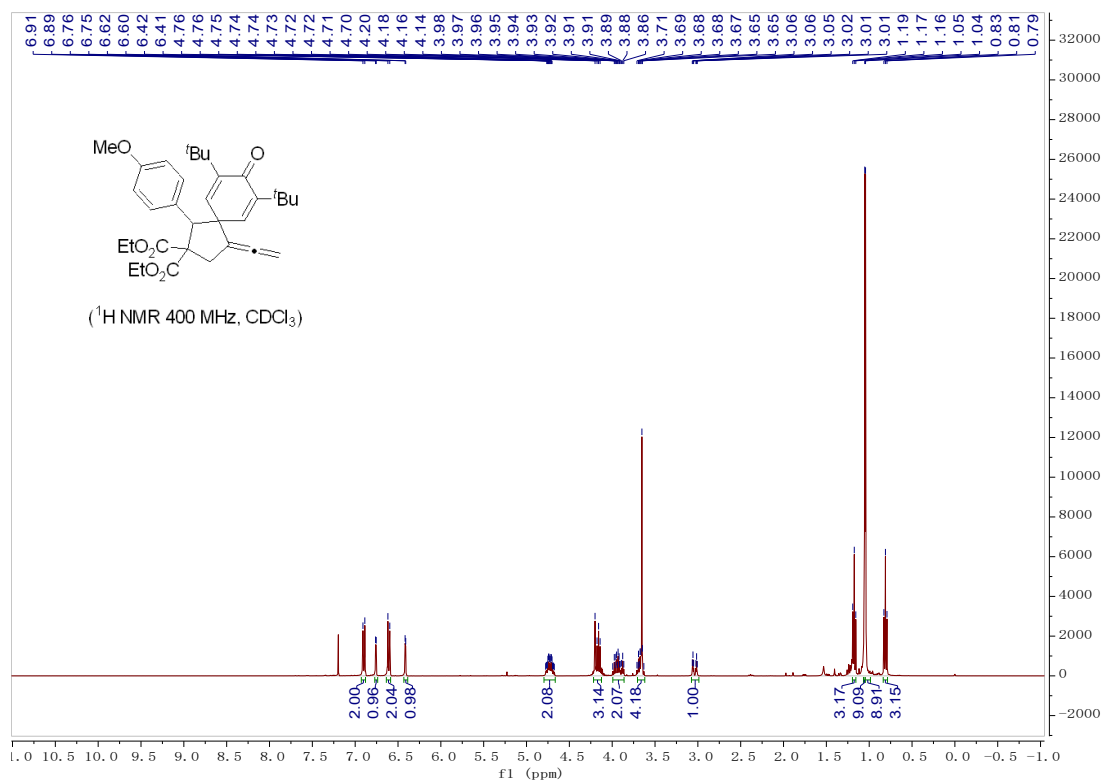

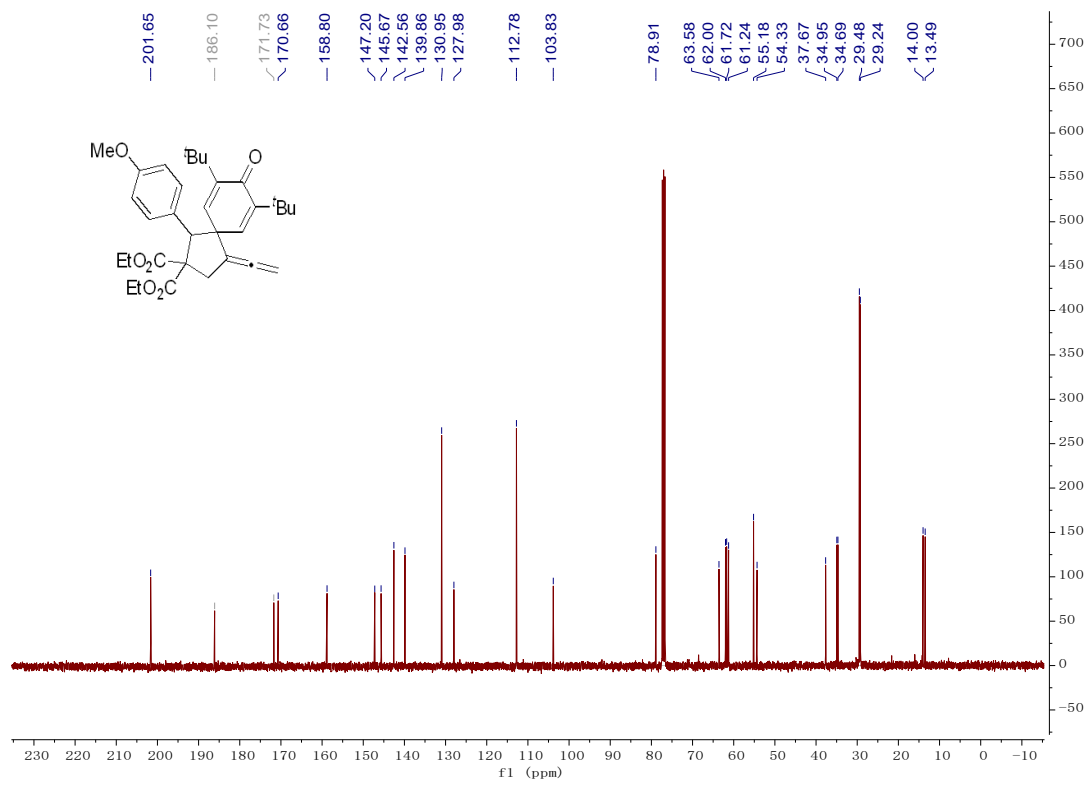



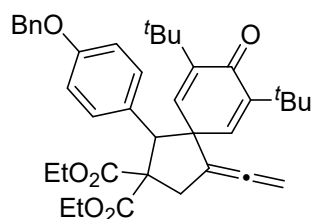

**diethyl 1-(4-(benzyloxy)phenyl)-7,9-di-*tert*-butyl-8-oxo-4-vinylidenespiro[4.5]deca-6,9-diene-2,2-dicarboxylate (3e):** Yield: 0.0439 g, 72%, a colorless oil; Eluent: PE/EA = 30/1.  $^1\text{H}$  NMR (400 MHz,  $\text{CDCl}_3$ , TMS)  $\delta$  7.31 – 7.19 (m, 5H), 6.89 (d,  $J = 8.8$  Hz, 2H), 6.75 (d,  $J = 3.0$  Hz, 1H), 6.67 (d,  $J = 8.8$  Hz, 2H), 6.41 (d,  $J = 3.0$  Hz, 1H), 4.92 (s, 2H), 4.77 – 4.67 (m, 2H), 4.21 – 4.10 (m, 3H), 3.96 – 3.86 (m, 2H), 3.63 (dq,  $J = 10.8, 7.2$  Hz, 1H), 3.03 (dt,  $J = 17.0, 3.2$  Hz, 1H), 1.16 (t,  $J = 7.2$  Hz, 3H), 1.05 (s, 9H), 1.04 (s, 9H), 0.77 (t,  $J = 7.2$  Hz, 3H);  $^{13}\text{C}$   $\{^1\text{H}\}$ -NMR (100 MHz,  $\text{CDCl}_3$ , TMS)  $\delta$  201.6, 186.0, 171.7, 170.6, 157.8, 147.2, 145.6, 142.5, 139.8, 136.8, 130.9, 128.5, 128.2, 127.8, 127.3, 113.8, 103.8, 78.9, 69.7, 63.5, 62.0, 61.7, 61.2, 54.3, 37.6, 34.9, 34.7, 29.5, 29.2, 14.0, 13.5; IR (neat):  $\nu$  2961.66, 2906.86, 2865.11, 1962.33, 1724.41, 1658.73, 1636.64, 1511.58, 1366.70, 1251.45, 1179.23, 910.46, 731.45  $\text{cm}^{-1}$ ; HRMS (ESI-TOF) Calcd for  $\text{C}_{39}\text{H}_{47}\text{O}_6$   $[\text{M}+\text{H}]^+$  : 611.3367, found: 611.3362.

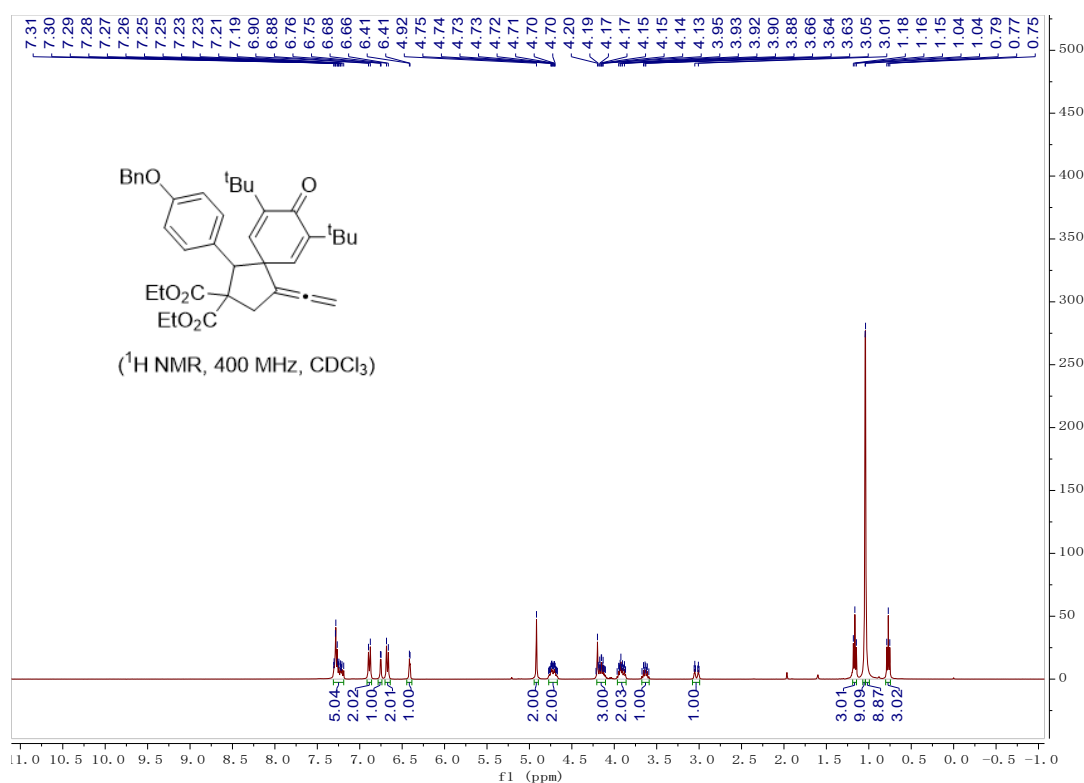

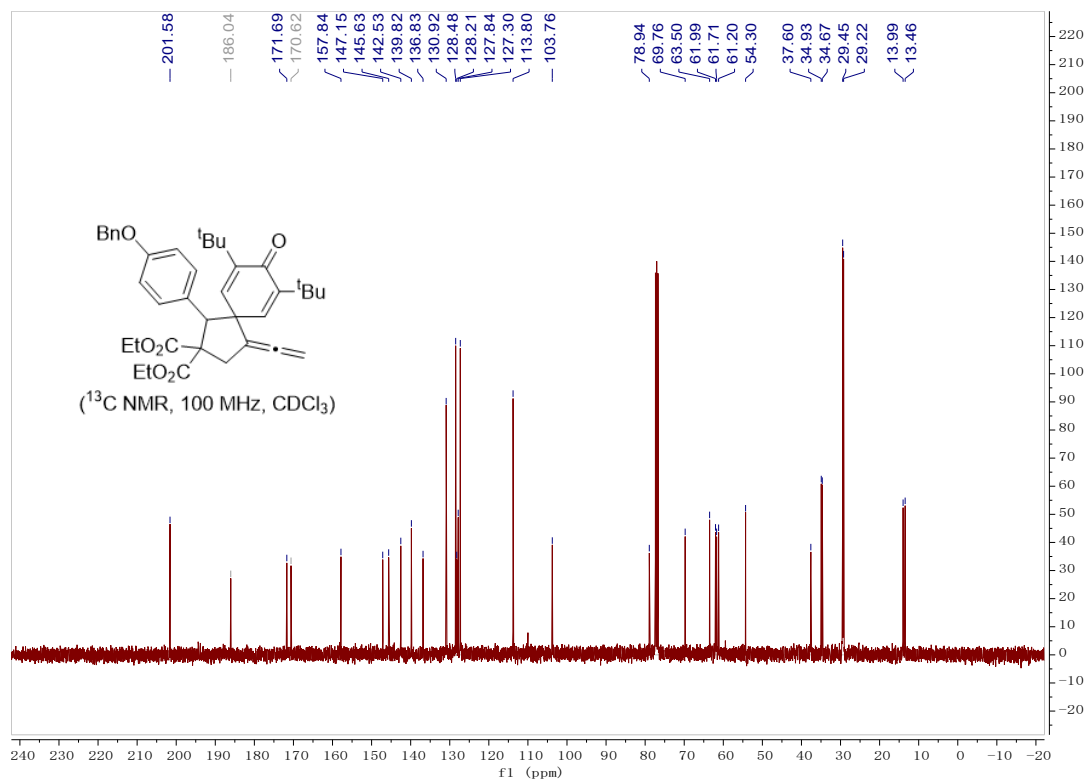

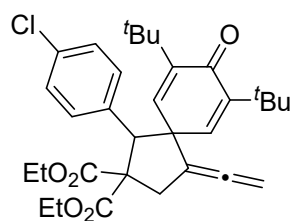

**diethyl 7,9-di-*tert*-butyl-1-(4-chlorophenyl)-8-oxo-4-vinylidenespiro[4.5]deca-6,9-diene-2,2-dicarboxylate (3f)**: Yield: 0.0367 g, 68%, a colorless oil; Eluent: PE/EA = 30/1.  $^1\text{H}$  NMR (400 MHz,  $\text{CDCl}_3$ , TMS)  $\delta$  7.12 (d,  $J = 7.6$  Hz, 2H), 7.00 (d,  $J = 8.0$  Hz, 2H), 6.82 (s, 1H), 6.45 (s, 1H), 4.87 – 4.75 (m, 2H), 4.29 – 4.17 (m, 3H), 4.07 – 3.91 (m, 2H), 3.78 – 3.67 (m, 1H), 3.10 (d,  $J = 17.4$  Hz, 1H), 1.23 (t,  $J = 6.8$  Hz, 3H), 1.12 (s, 9H), 1.09 (s, 9H), 0.88 (t,  $J = 6.8$  Hz, 3H);  $^{13}\text{C}\{^1\text{H}\}$ -NMR (100 MHz,  $\text{CDCl}_3$ , TMS)  $\delta$  201.6, 185.9, 171.5, 170.4, 147.6, 146.0, 142.0, 139.2, 134.4, 133.3, 131.1, 127.5, 103.5, 79.2, 63.4, 62.1, 61.8, 61.1, 54.1, 37.5, 35.0, 34.7, 29.4, 29.2, 14.0, 13.4; IR (neat):  $\nu$  2957.75, 2906.78, 2862.42, 1959.67, 1725.17, 1659.31, 1637.69, 1493.19, 1252.87, 1158.69, 909.24, 731.30  $\text{cm}^{-1}$ ; HRMS (ESI-TOF) Calcd for  $\text{C}_{32}\text{H}_{40}\text{ClO}_5\text{Na}[\text{M}+\text{Na}]^+$  : 561.2378, found: 561.2375.

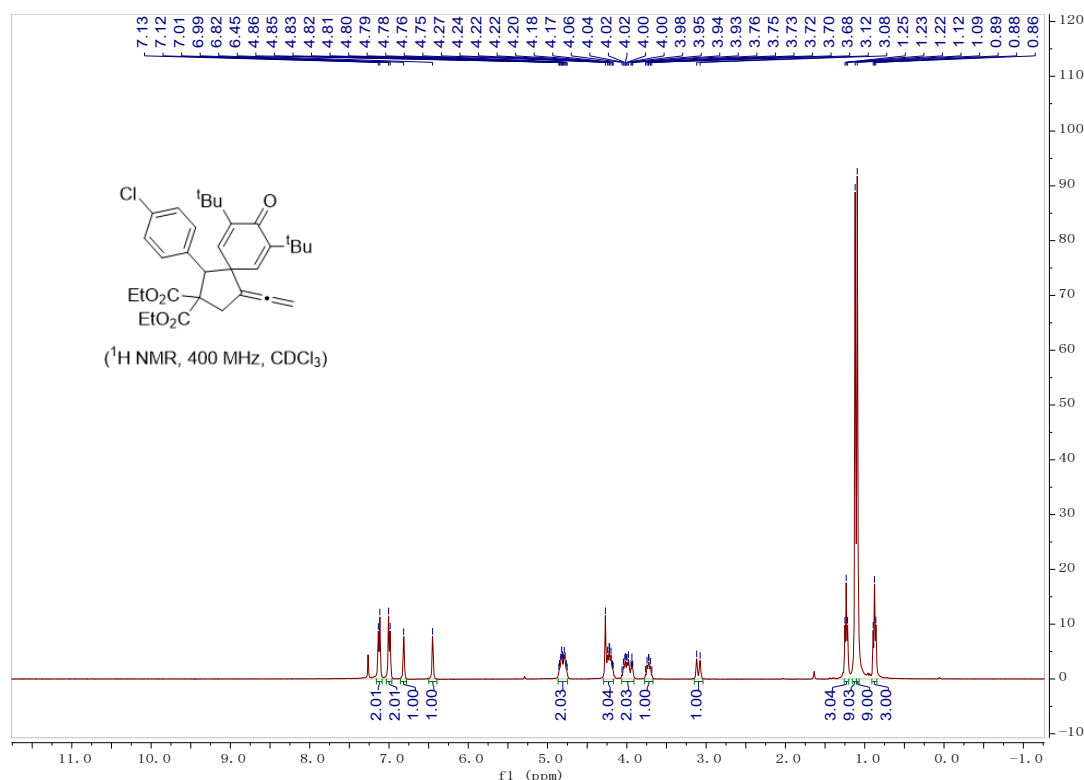

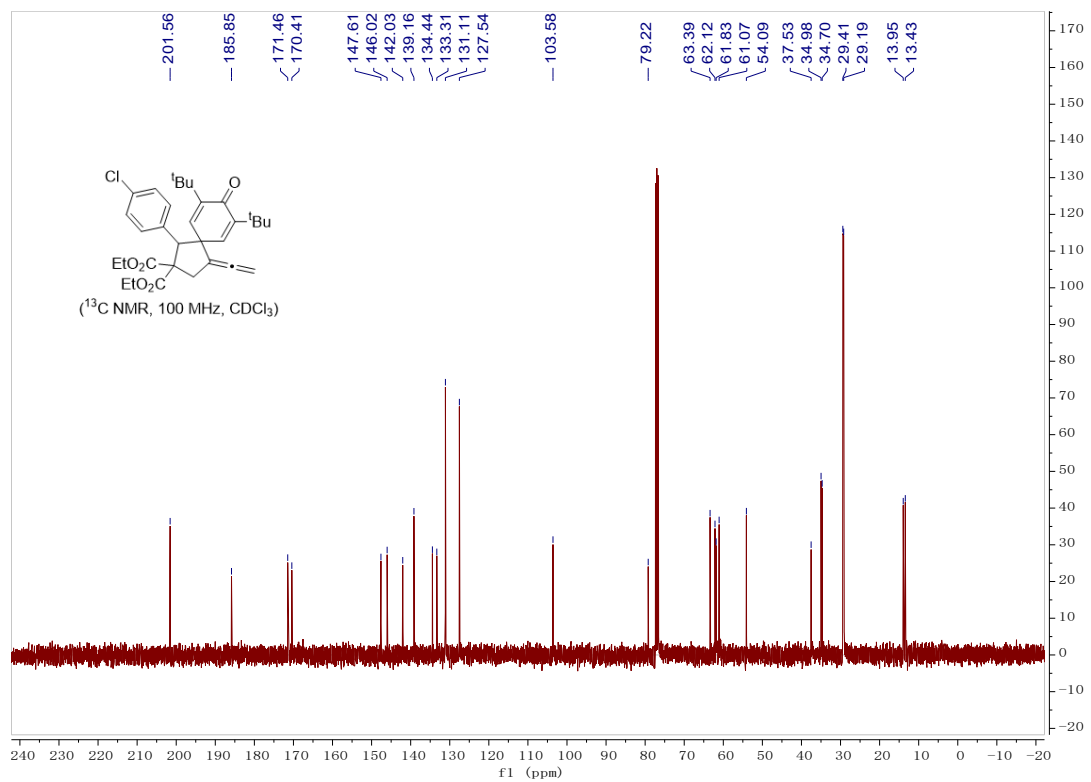

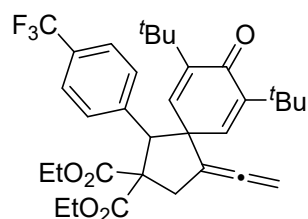

**diethyl 7,9-di-*tert*-butyl-8-oxo-1-(4-(trifluoromethyl)phenyl)-4-vinylidenespiro[4.5]deca-6,9-diene-2,2-dicarboxylate (3g):** Yield: 0.0389 g, 68%, a colorless oil; Eluent: PE/EA = 30/1.  $^1\text{H}$  NMR (400 MHz,  $\text{CDCl}_3$ , TMS)  $\delta$  7.36 (d,  $J = 8.2$  Hz, 2H), 7.14 (d,  $J = 8.2$  Hz, 2H), 6.73 (d,  $J = 3.0$  Hz, 1H), 6.41 (d,  $J = 3.0$  Hz, 1H), 4.76 (m, 2H), 4.30 (s, 1H), 4.23 – 4.11 (m, 2H), 3.99 – 3.86 (m, 2H), 3.66 (dq,  $J = 10.8, 7.2$  Hz, 1H), 3.07 (dt,  $J = 17.0, 3.2$  Hz, 1H), 1.18 (t,  $J = 7.2$  Hz, 3H), 1.04 (s, 9H), 1.03 (s, 9H), 0.76 (t,  $J = 7.2$  Hz, 3H);  $^{13}\text{C}\{^1\text{H}\}$ -NMR (100 MHz,  $\text{CDCl}_3$ , TMS)  $\delta$  201.6, 185.8, 171.4, 170.3, 147.8, 146.2, 141.8, 140.3, 139.0, 130.1, 129.6 (q,  $J = 32.6$  Hz), 124.3 (q,  $J = 3.8$  Hz), 123.9 (q,  $J = 272$  Hz), 103.6, 79.4, 63.5, 62.2, 61.9, 61.3, 54.0, 37.7, 35.0, 34.7, 29.4, 29.2, 14.0, 13.3;  $^{19}\text{F}$  NMR (376 MHz,  $\text{CDCl}_3$ )  $\delta$  -61.87; IR (neat):  $\nu$  2958.45, 2914.69, 2865.11, 1964.94, 1715.71, 1660.15, 1638.34, 1618.94, 1389.96, 1325.53, 1165.09, 1096.83, 1070.22, 1033.48, 822.12  $\text{cm}^{-1}$ ; HRMS (DART) Calcd for  $\text{C}_{33}\text{H}_{40}\text{F}_3\text{O}_5$   $[\text{M}+\text{H}]^+$  : 573.2824, found: 573.2822.

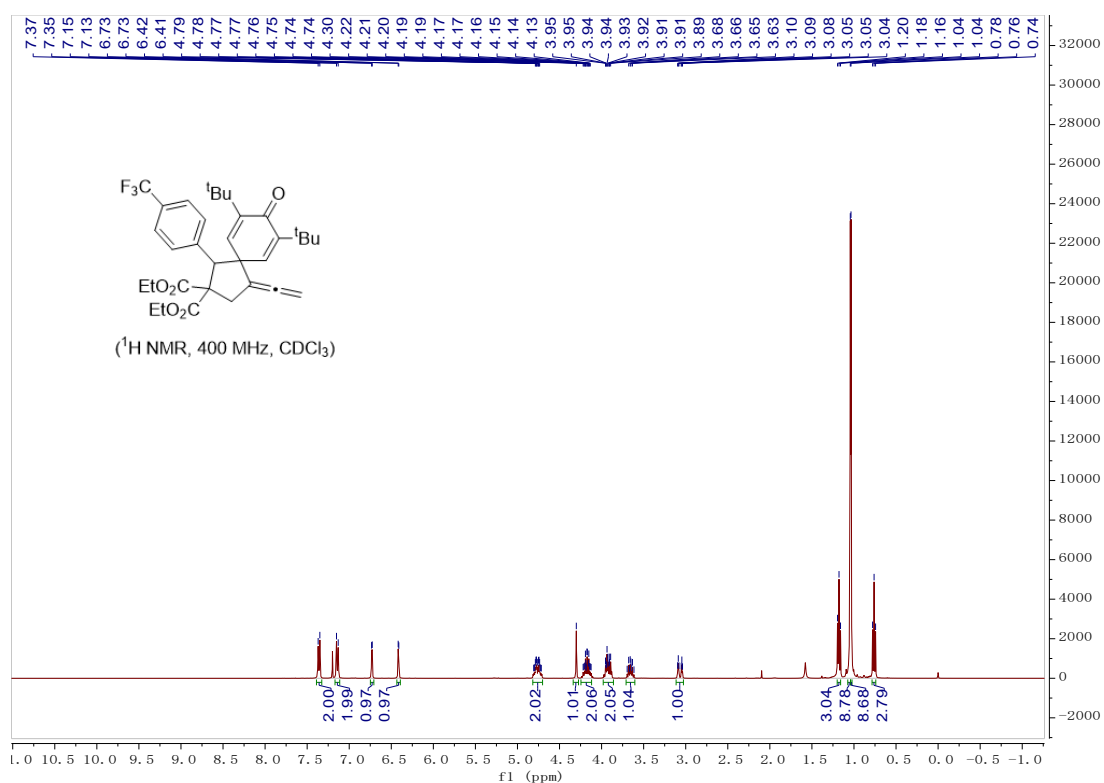

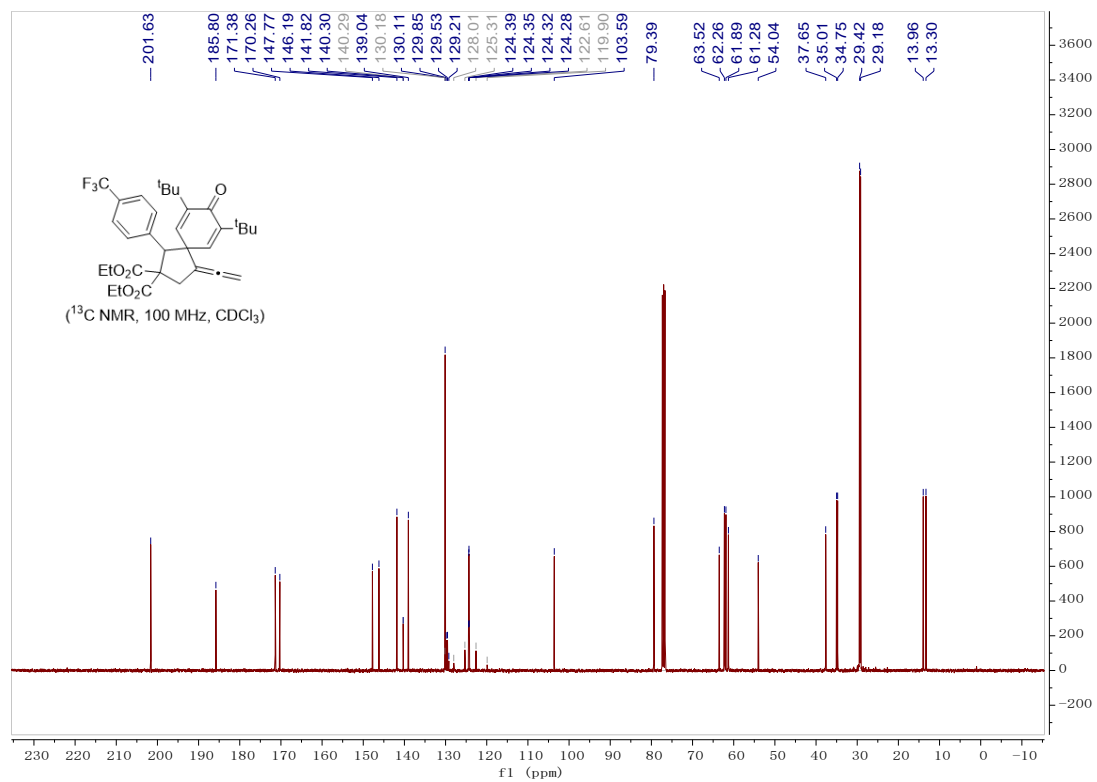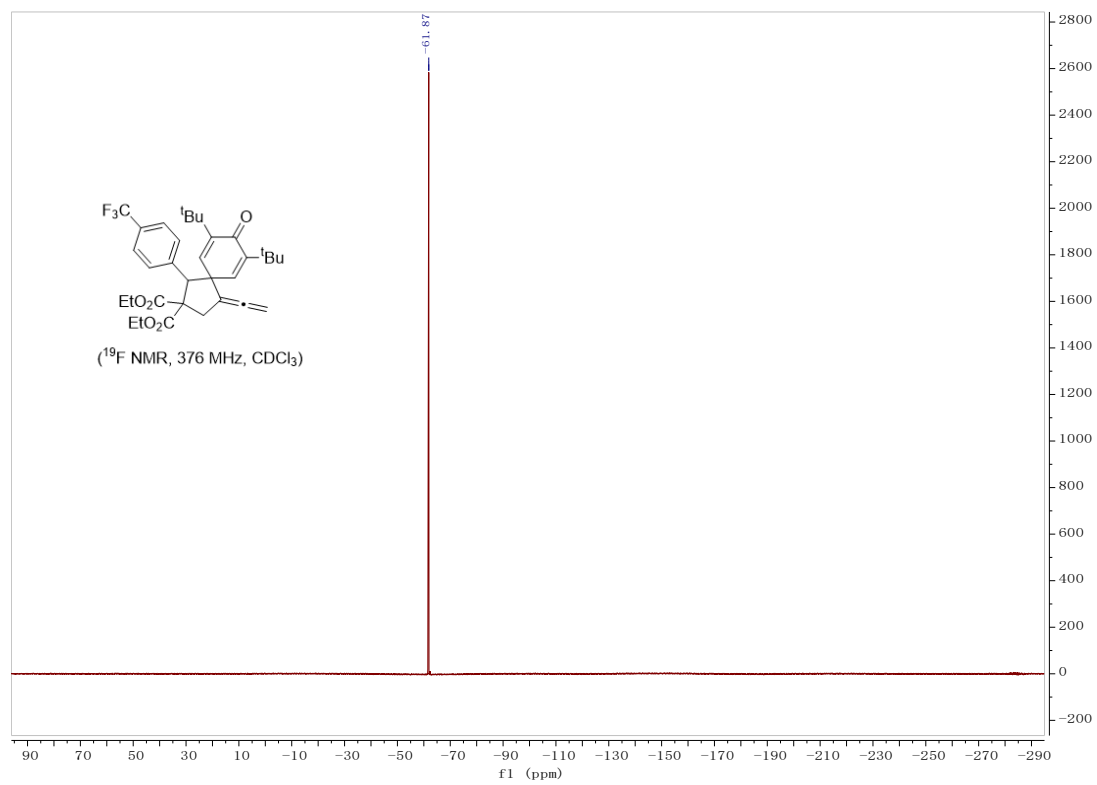

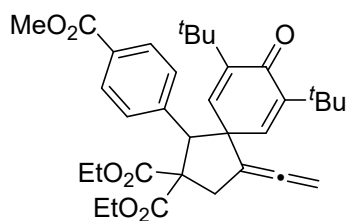

**diethyl 7,9-di-*tert*-butyl-1-(4-(methoxycarbonyl)phenyl)-8-oxo-4-vinylidenespiro[4.5]deca-6,9-diene-2,2-dicarboxylate (3h):** Yield: 0.0416 g, 74%, a colorless oil; Eluent: PE/EA = 30/1.  $^1\text{H}$  NMR (400 MHz,  $\text{CDCl}_3$ , TMS)  $\delta$  7.77 (d,  $J = 8.4$  Hz, 2H), 7.08 (d,  $J = 8.4$  Hz, 2H), 6.73 (d,  $J = 3.0$  Hz, 1H), 6.41 (d,  $J = 3.0$  Hz, 1H), 4.82 – 4.69 (m, 2H), 4.29 (s, 1H), 4.22 – 4.11 (m, 2H), 3.99 – 3.87 (m, 2H), 3.81 (s, 3H), 3.63 (dq,  $J = 10.8, 7.2$  Hz, 1H), 3.07 (dt,  $J = 17.0, 3.2$  Hz, 1H), 1.17 (t,  $J = 7.2$  Hz, 3H), 1.04 (s, 9H), 1.03 (s, 9H), 0.77 (t,  $J = 7.2$  Hz, 3H);  $^{13}\text{C}$   $\{^1\text{H}\}$ -NMR (100 MHz,  $\text{CDCl}_3$ , TMS)  $\delta$  201.6, 185.9, 171.4, 170.3, 166.7, 147.6, 146.1, 141.9, 141.4, 139.1, 129.8, 129.1, 128.7, 103.7, 79.3, 63.5, 62.2, 61.8, 61.6, 54.1, 52.1, 37.6, 35.0, 34.7, 29.4, 29.2, 14.0, 13.4; IR (neat):  $\nu$  2955.71, 2904.25, 2867.72, 1959.72, 1722.03, 1659.67, 1637.97, 1611.21, 1366.19, 1278.24, 1254.33, 1219.08, 1108.80  $\text{cm}^{-1}$ ; HRMS (DART) Calcd for  $\text{C}_{34}\text{H}_{43}\text{O}_7$   $[\text{M}+\text{H}]^+$  : 563.3003, found: 563.3003.

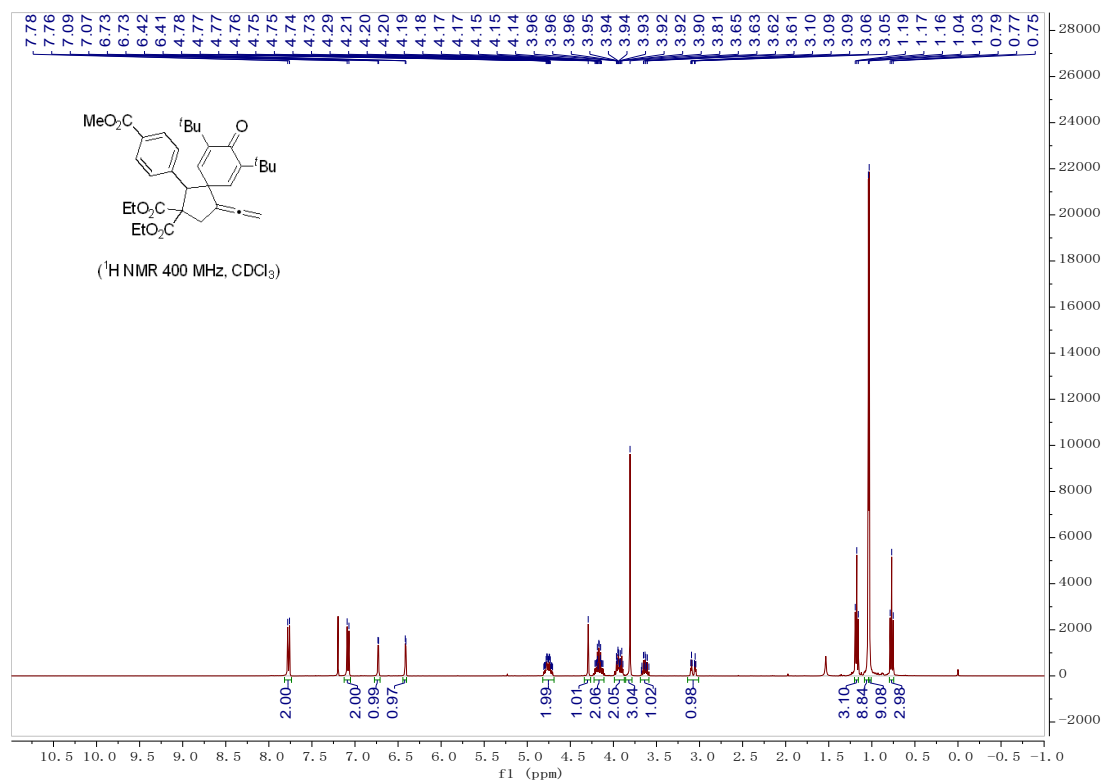

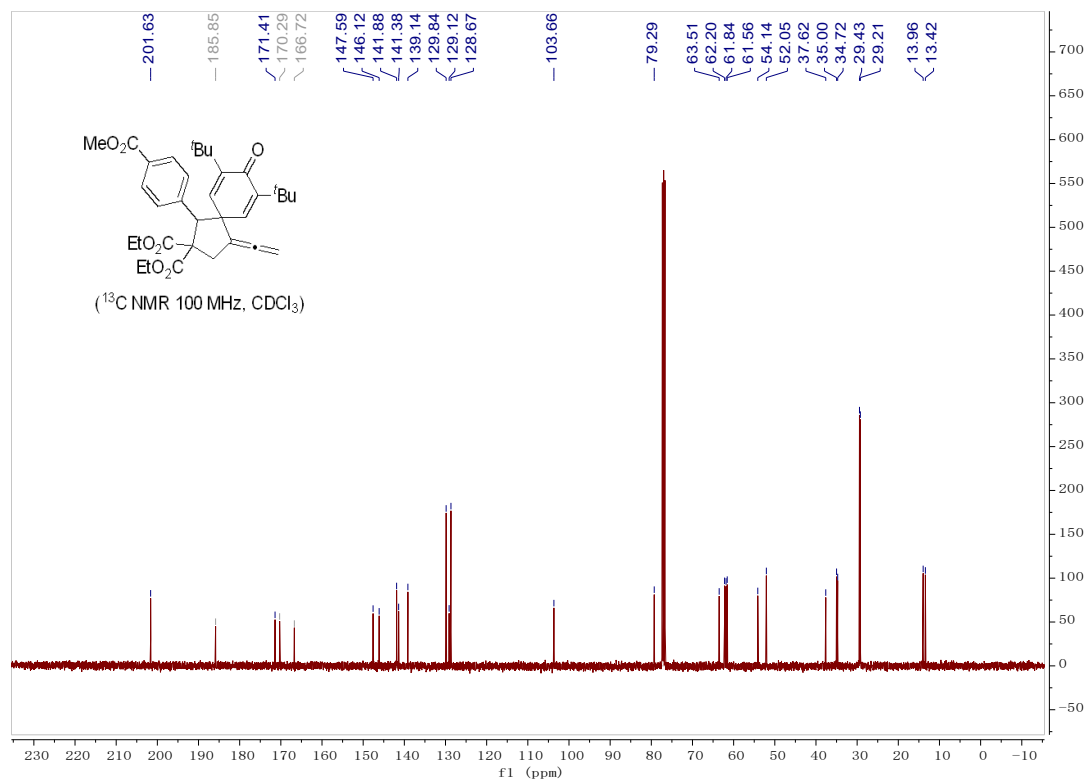



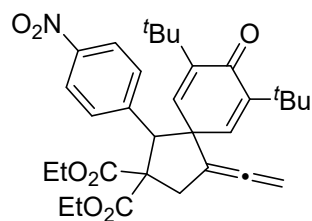

**diethyl 7,9-di-*tert*-butyl-1-(4-nitrophenyl)-8-oxo-4-vinylidenespiro[4.5]deca-6,9-diene-2,2-dicarboxylate (3i):** Yield: 0.0234 g, 42%, a colorless oil; Eluent: PE/EA = 30/1.  $^1\text{H}$  NMR (400 MHz,  $\text{CDCl}_3$ , TMS)  $\delta$  8.04 (d,  $J = 8.2$  Hz, 2H), 7.30 – 7.26 (m, 2H), 6.85 (d,  $J = 3.0$  Hz, 1H), 6.50 – 6.42 (m, 1H), 4.92 – 4.79 (m, 2H), 4.40 (s, 1H), 4.34 – 4.19 (m, 2H), 4.15 – 3.94 (m, 2H), 3.80 – 3.70 (m, 1H), 3.14 (d,  $J = 17.2$  Hz, 1H), 1.25 (t,  $J = 7.0$  Hz, 3H), 1.14 (s, 9H), 1.10 (s, 9H), 0.90 (t,  $J = 7.0$  Hz, 3H);  $^{13}\text{C}\{^1\text{H}\}$ -NMR (100 MHz,  $\text{CDCl}_3$ , TMS)  $\delta$  201.7, 185.7, 171.2, 170.2, 148.3, 147.1, 146.7, 143.6, 141.5, 138.4, 130.8, 122.5, 103.4, 79.7, 63.4, 62.4, 62.0, 61.3, 54.1, 37.6, 35.1, 34.8, 29.4, 29.3, 14.0, 13.5; IR (neat):  $\nu$  2957.82, 2862.51, 1964.94, 1725.64, 1715.35, 1659.96, 1523.15, 1346.94, 1255.85, 1219.70, 1110.56, 882.15, 857.82  $\text{cm}^{-1}$ ; HRMS (ESI-TOF) Calcd for  $\text{C}_{32}\text{H}_{40}\text{NO}_7$   $[\text{M}+\text{H}]^+$  : 550.2799, found: 550.2793.

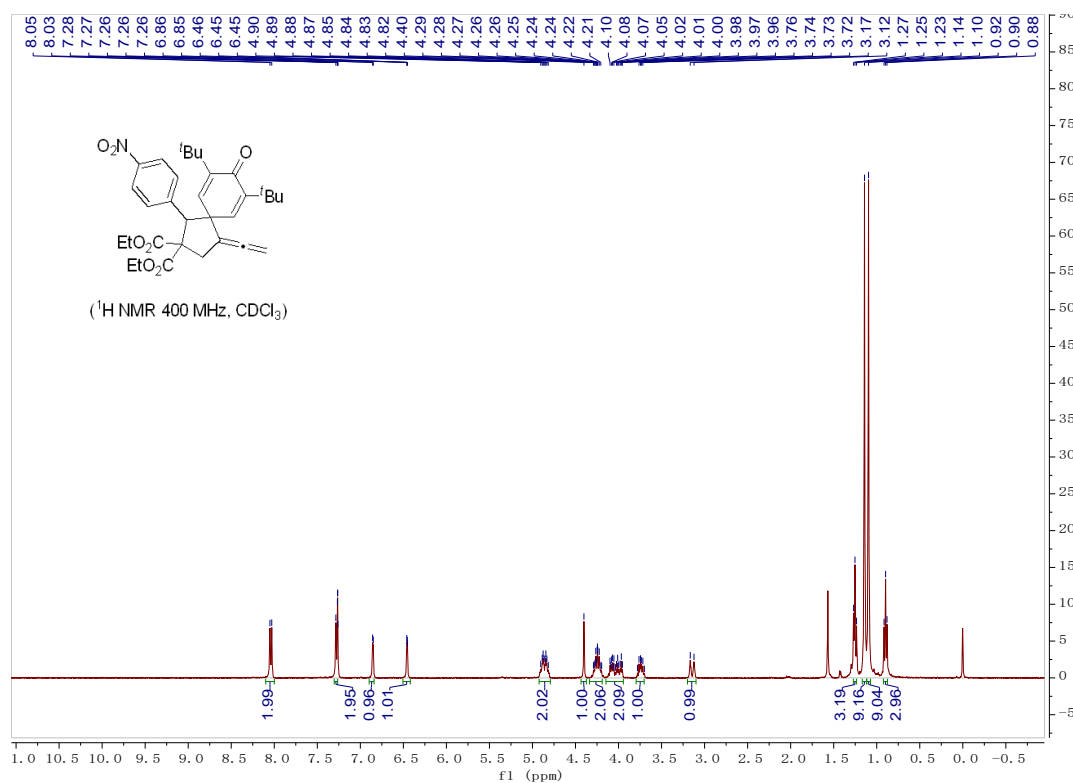

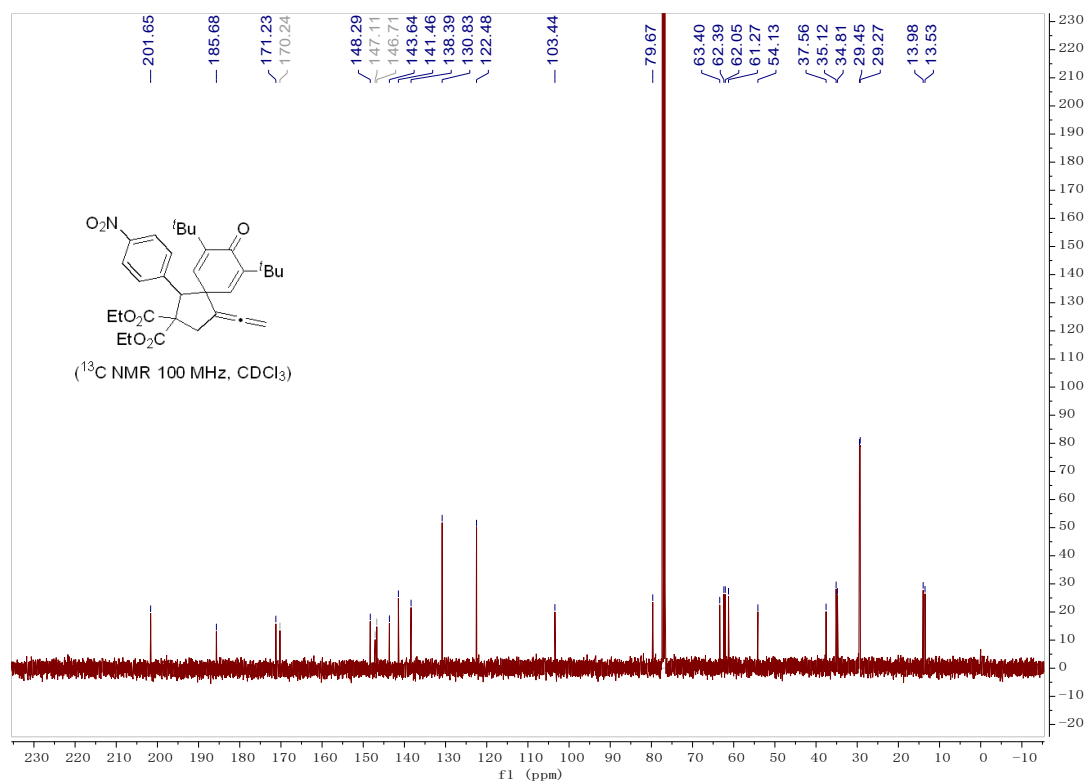

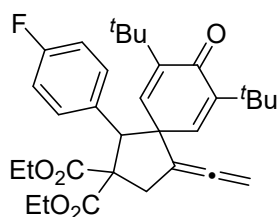

**diethyl 7,9-di-*tert*-butyl-1-(4-fluorophenyl)-8-oxo-4-vinylidenespiro[4.5]deca-6,9-diene-2,2-dicarboxylate (3j)**: Yield: 0.0376 g, 72%, a colorless oil; Eluent: PE/EA = 30/1.  $^1\text{H}$  NMR (400 MHz,  $\text{CDCl}_3$ , TMS)  $\delta$  7.01 – 6.93 (m, 2H), 6.84 – 6.73 (m, 3H), 6.53 – 6.32 (m, 1H), 4.87 – 4.67 (m, 2H), 4.29 – 4.11 (m, 3H), 4.03 – 3.85 (m, 2H), 3.67 (dq,  $J = 10.8, 7.2$  Hz, 1H), 3.04 (d,  $J = 17.2$  Hz, 1H), 1.17 (t,  $J = 7.0$  Hz, 3H), 1.06 (s, 9H), 1.04 (s, 9H), 0.81 (t,  $J = 7.0$  Hz, 3H);  $^{13}\text{C}\{^1\text{H}\}$ -NMR (100 MHz,  $\text{CDCl}_3$ , TMS)  $\delta$  201.6, 185.9, 171.6, 170.5, 162.1 (d,  $J = 246.6$  Hz), 147.6, 146.1, 142.2, 139.3, 131.7 (d,  $J = 3.4$  Hz), 131.5 (d,  $J = 8.0$  Hz), 114.3 (d,  $J = 21.4$  Hz), 103.7, 79.1, 63.5, 62.1, 61.8, 61.1, 54.2, 37.6, 35.0, 34.7, 29.4, 29.2, 14.0, 13.5;  $^{19}\text{F}$  NMR (376 MHz,  $\text{CDCl}_3$ )  $\delta$  -114.84; IR (neat):  $\nu$  2957.85, 2904.25, 2859.90, 1962.33, 1724.69, 1659.60, 1638.09, 1252.83, 1228.13, 1207.17, 1161.92, 1130.87, 1096.98, 1034.38, 882.02  $\text{cm}^{-1}$ ; HRMS (DART) Calcd for  $\text{C}_{32}\text{H}_{40}\text{FO}_5$   $[\text{M}+\text{H}]^+$  : 523.2854, found: 523.2857.

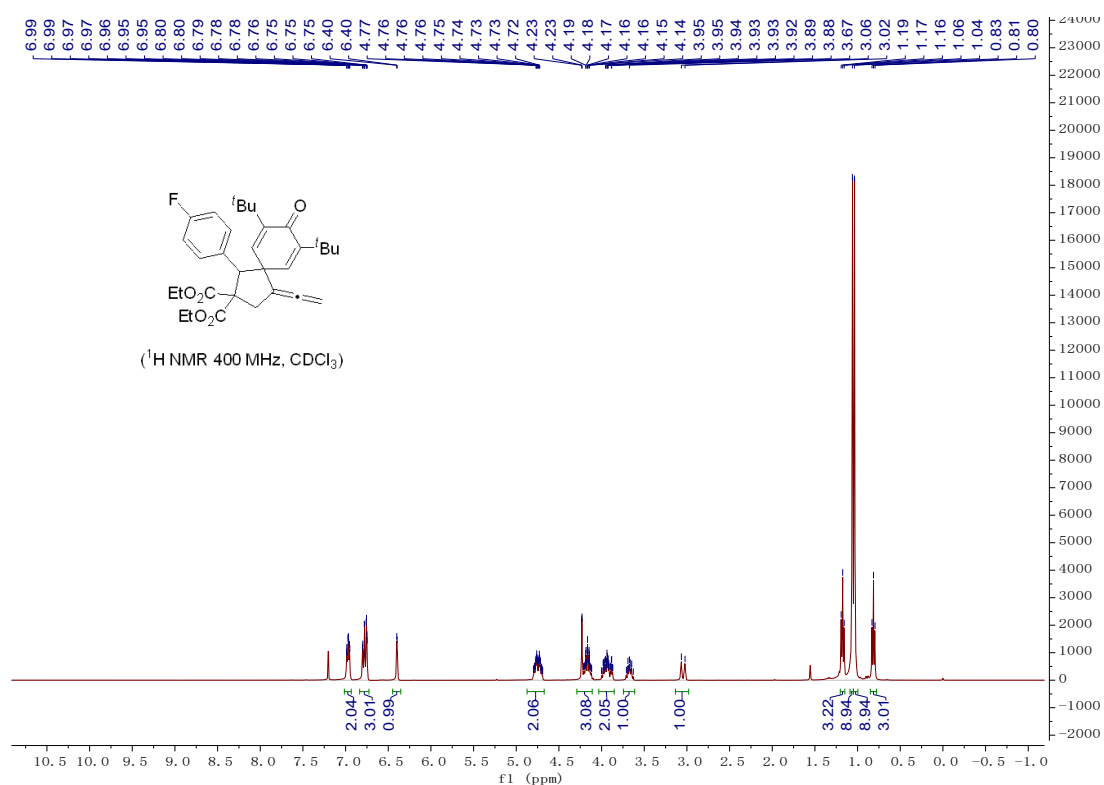

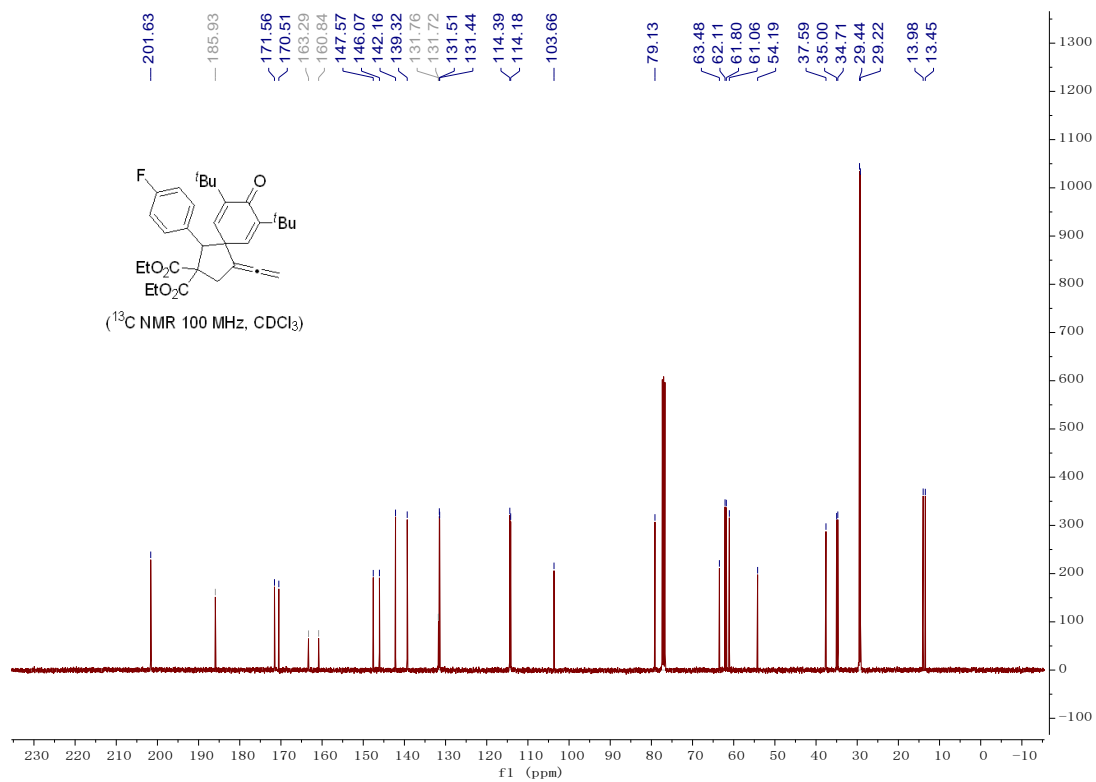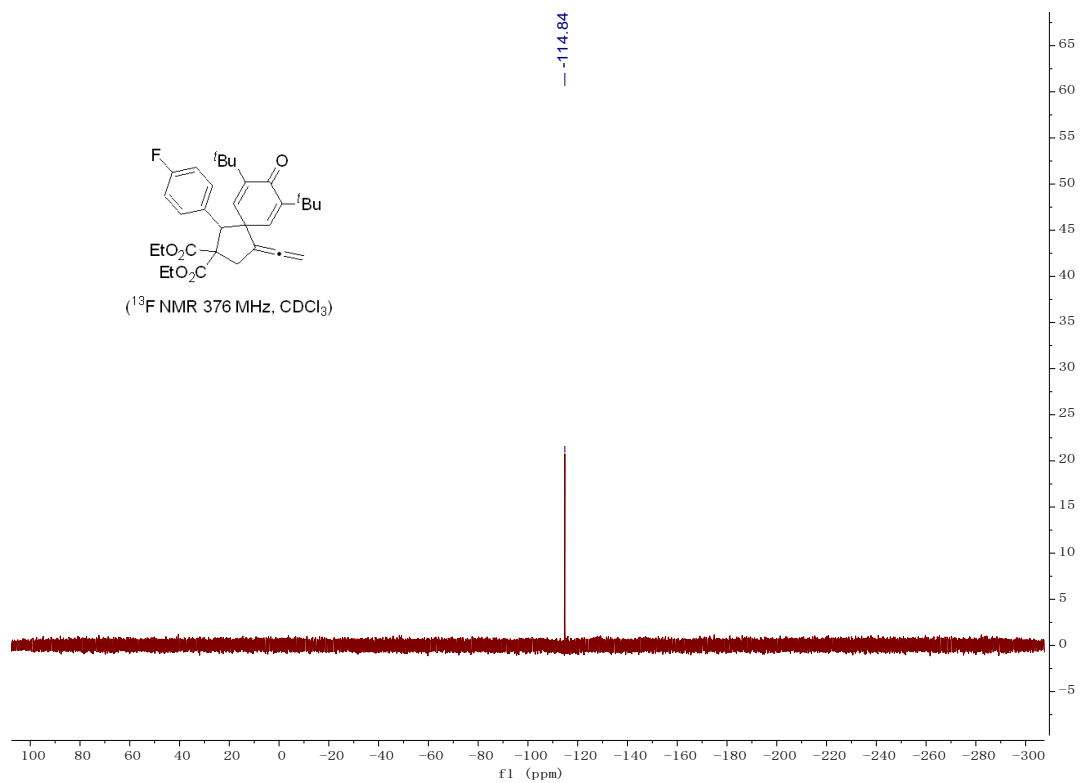

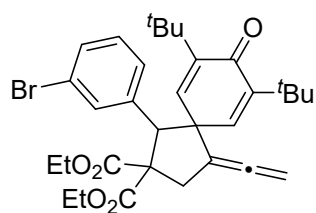

**diethyl 1-(3-bromophenyl)-7,9-di-*tert*-butyl-8-oxo-4-vinylidenespiro[4.5]deca-6,9-diene-2,2-dicarboxylate (3k):** Yield: 0.0442 g, 76%, a pale yellow solid, m.p. 100-102 °C; Eluent: PE/EA = 30/1.  $^1\text{H}$  NMR (400 MHz,  $\text{CDCl}_3$ , TMS)  $\delta$  7.28 – 7.20 (m, 1H), 7.08 (s, 1H), 7.02 – 6.93 (m, 2H), 6.83 (d,  $J = 2.8$  Hz, 1H), 6.37 (d,  $J = 2.8$  Hz, 1H), 4.83 – 4.68 (m, 2H), 4.23 – 4.09 (m, 3H), 4.06 – 3.97 (m, 1H), 3.91 (dt,  $J = 17.0, 5.2$  Hz, 1H), 3.76 (dq,  $J = 10.8, 7.2$  Hz, 1H), 3.02 (dt,  $J = 17.0, 3.2$  Hz, 1H), 1.17 (t,  $J = 7.2$  Hz, 3H), 1.10 (s, 9H), 1.03 (s, 9H), 0.85 (t,  $J = 7.2$  Hz, 3H);  $^{13}\text{C}\{^1\text{H}\}$ -NMR (100 MHz,  $\text{CDCl}_3$ , TMS)  $\delta$  201.6, 185.9, 171.4, 170.6, 147.9, 146.2, 142.0, 138.7, 137.9, 132.5, 130.5, 129.0, 128.9, 121.2, 103.5, 79.3, 63.1, 62.1, 62.0, 61.4, 54.2, 37.6, 35.1, 34.7, 29.4, 29.3, 14.0, 13.5; IR (neat):  $\nu$  2957.06, 2909.39, 2865.03, 1962.28, 1724.48, 1659.34, 1638.14, 1365.87, 1261.71, 1218.85, 881.41, 858.40, 698.49  $\text{cm}^{-1}$ ; HRMS (ESI-TOF) Calcd for  $\text{C}_{32}\text{H}_{40}\text{BrO}_5$   $[\text{M}+\text{H}]^+$  : 583.2054, found: 583.2052.

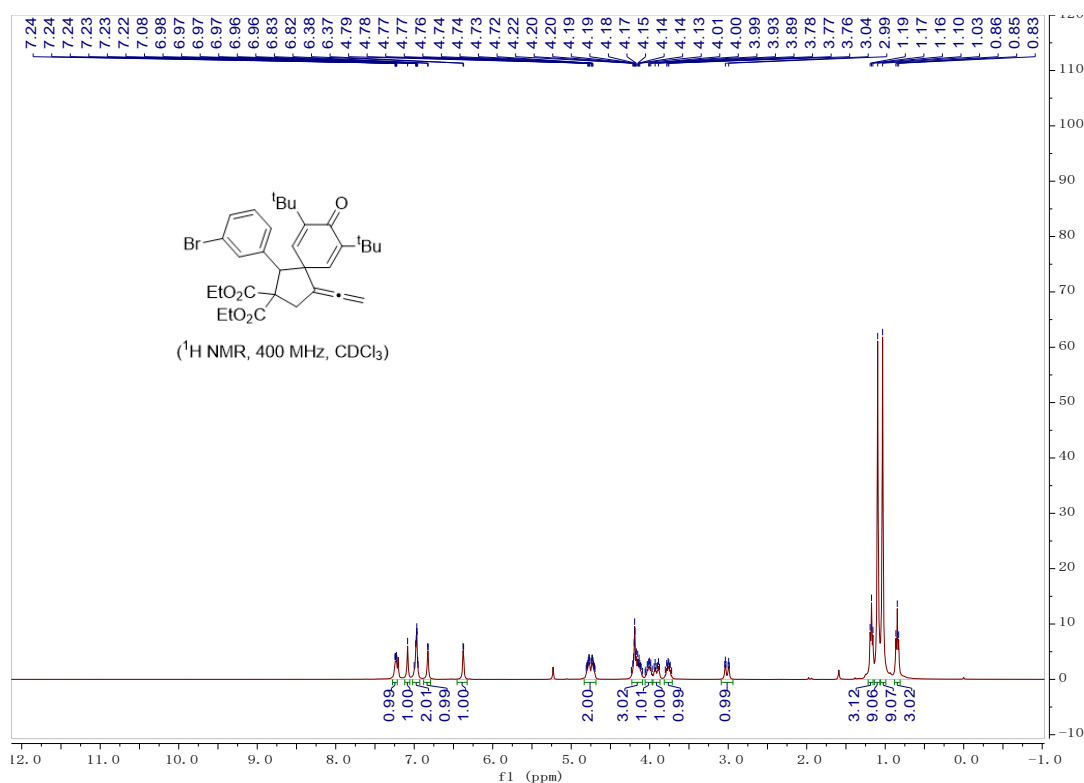

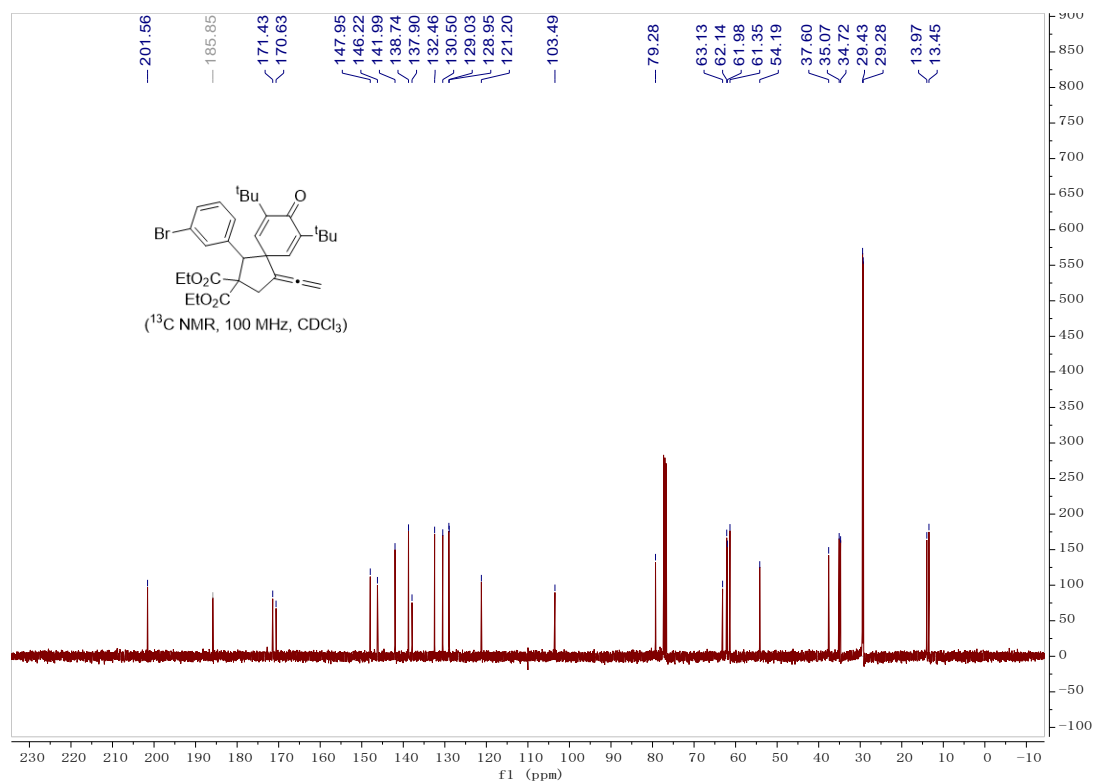

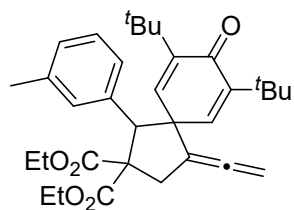

**diethyl 7,9-di-*tert*-butyl-8-oxo-1-(*m*-tolyl)-4-vinylidenespiro[4.5]deca-6,9-diene-2,2-dicarboxylate (31):** Yield: 0.0363 g, 70%, a pale yellow solid, m.p. 108-110 °C; Eluent: PE/EA = 30/1. <sup>1</sup>H NMR (400 MHz, CDCl<sub>3</sub>, TMS) δ 7.01 (t, *J* = 7.6 Hz, 1H), 6.93 (d, *J* = 7.6 Hz, 1H), 6.87 – 6.76 (m, 3H), 6.48 (d, *J* = 2.8 Hz, 1H), 4.85 – 4.71 (m, 2H), 4.29 – 4.14 (m, 3H), 4.03 – 3.91 (m, 2H), 3.73 (dq, *J* = 10.8, 7.2 Hz, 1H), 3.09 (dt, *J* = 17.0, 3.2 Hz, 1H), 2.20 (s, 3H), 1.22 (t, *J* = 7.2 Hz, 3H), 1.09 (s, 9H), 1.08 (s, 9H), 0.82 (t, *J* = 7.2 Hz, 3H); <sup>13</sup>C{<sup>1</sup>H}-NMR (100 MHz, CDCl<sub>3</sub>, TMS) δ 201.6, 186.1, 171.7, 170.6, 147.1, 145.5, 142.5, 139.8, 136.6, 135.7, 130.4, 128.0, 127.3, 126.8, 103.8, 78.9, 63.5, 62.0, 61.8, 61.6, 54.2, 37.8, 34.9, 34.7, 29.4, 29.2, 21.3, 14.0, 13.3; IR (neat): ν 2956.67, 2865.03, 1967.50, 1725.27, 1658.92, 1638.07, 1453.53, 1366.12, 1255.84, 1096.61, 858.20, 780.35 cm<sup>-1</sup>; HRMS (ESI-TOF) Calcd for C<sub>33</sub>H<sub>43</sub>O<sub>5</sub> [M+H]<sup>+</sup> : 519.3105, found: 519.3102.

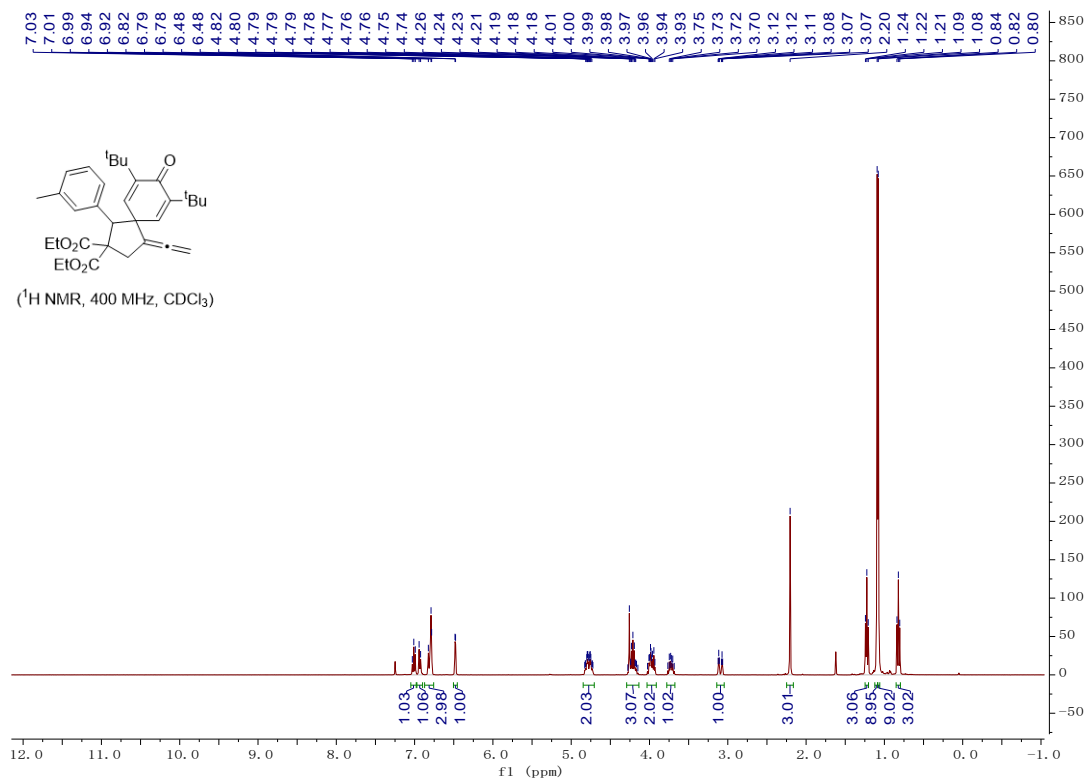

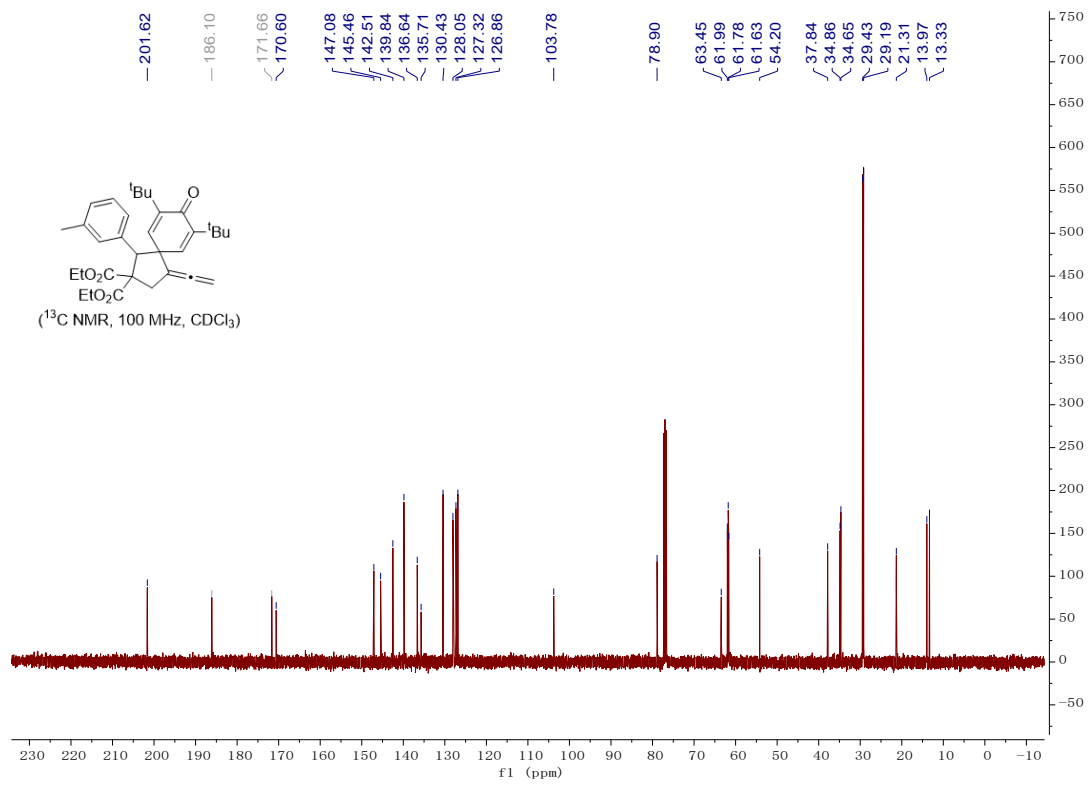



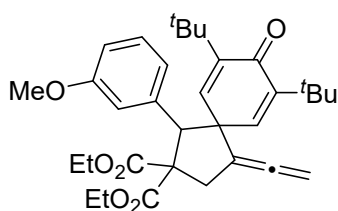

**diethyl 7,9-di-*tert*-butyl-1-(3-methoxyphenyl)-8-oxo-4-vinylidenespiro[4.5]deca-6,9-diene-2,2-dicarboxylate (3m):** Yield: 0.0443 g, 83%, a pale yellow solid, m.p. 118-120 °C; Eluent: PE/EA = 30/1.  $^1\text{H}$  NMR (400 MHz,  $\text{CDCl}_3$ , TMS)  $\delta$  6.99 (t,  $J = 8.0$  Hz, 1H), 6.63 (dd,  $J = 9.2, 2.4$  Hz, 2H), 6.59 – 6.51 (m, 2H), 6.46 (d,  $J = 2.8$  Hz, 1H), 4.79 – 4.67 (m, 2H), 4.23 – 4.13 (m, 3H), 3.96 – 3.86 (m, 2H), 3.74 – 3.67 (m, 1H), 3.64 (s, 3H), 3.08 (dt,  $J = 17.0, 3.2$  Hz, 1H), 1.18 (t,  $J = 7.2$  Hz, 3H), 1.07 (s, 9H), 1.01 (s, 9H), 0.77 (t,  $J = 7.2$  Hz, 3H);  $^{13}\text{C}\{^1\text{H}\}$ -NMR (100 MHz,  $\text{CDCl}_3$ , TMS)  $\delta$  201.6, 186.1, 171.6, 170.3, 158.8, 146.8, 145.5, 142.4, 140.0, 137.7, 128.4, 121.9, 115.8, 112.6, 103.8, 78.9, 63.7, 62.1, 61.7, 61.5, 55.1, 54.1, 37.8, 34.8, 34.7, 29.4, 29.1, 14.0, 13.4; IR (neat):  $\nu$  2956.33, 2906.54, 2867.29, 1967.29, 1725.75, 1658.76, 1638.12, 1366.54, 1256.49, 1157.56, 858.67, 700.88  $\text{cm}^{-1}$ ; HRMS (ESI-TOF) Calcd for  $\text{C}_{33}\text{H}_{43}\text{O}_6$   $[\text{M}+\text{H}]^+$  : 535.3053, found: 535.3054.

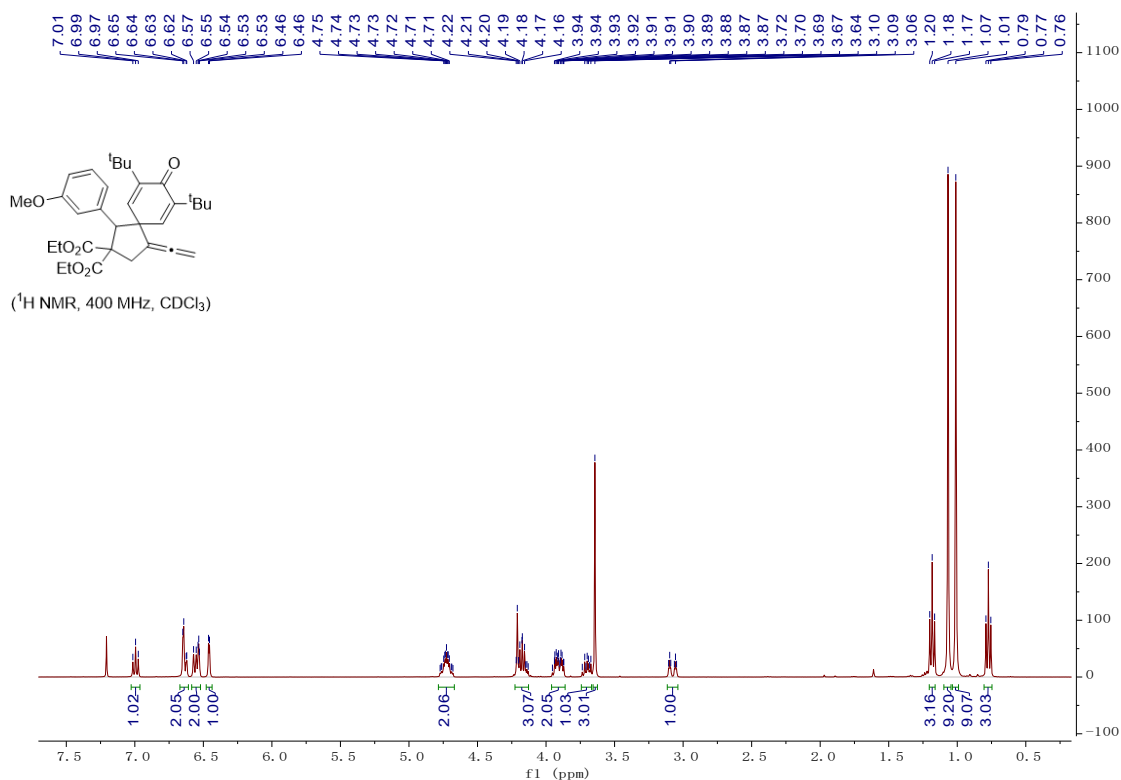

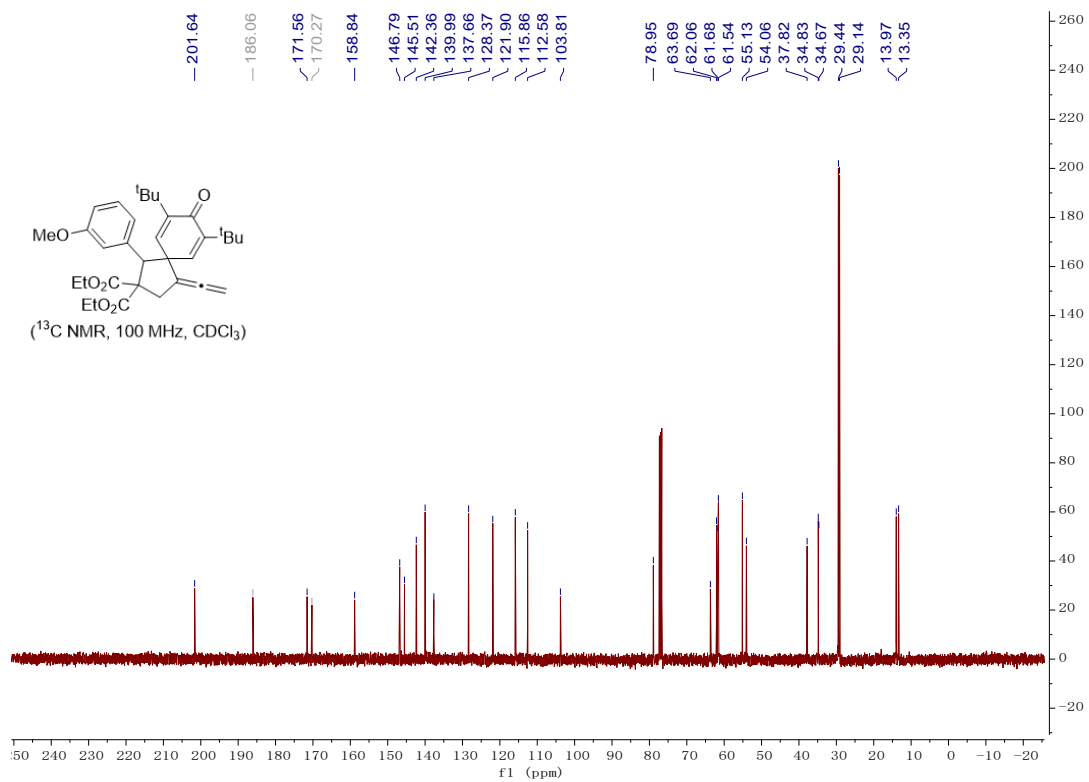

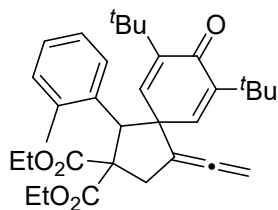

**diethyl 7,9-di-*tert*-butyl-8-oxo-1-(*o*-tolyl)-4-vinylidenespiro[4.5]deca-6,9-diene-2,2-dicarboxylate (3n):** Yield: 0.0373 g, 72%, a pale yellow solid, m.p. 119-121 °C; Eluent: PE/EA = 30/1. <sup>1</sup>H NMR (400 MHz, CDCl<sub>3</sub>, TMS) δ 7.04 – 6.97 (m, 3H), 6.93 (d, *J* = 7.2 Hz, 1H), 6.68 - 6.62 (m, 1H), 6.45 - 6.40 (m, 1H), 4.82 – 4.77 (m, 2H), 4.74 (s, 1H), 4.24 (q, *J* = 7.2 Hz, 2H), 4.01 (dt, *J* = 17.2, 5.0 Hz, 1H), 3.86 (dq, *J* = 10.8, 7.2 Hz, 1H), 3.68 (dq, *J* = 10.8, 7.2 Hz, 1H), 3.24 (dt, *J* = 17.2, 3.4 Hz, 1H), 2.28 (s, 3H), 1.25 (t, *J* = 7.2 Hz, 3H), 1.15 (s, 9H), 0.97 (s, 9H), 0.73 (t, *J* = 7.2 Hz, 3H); <sup>13</sup>C {<sup>1</sup>H}-NMR (100 MHz, CDCl<sub>3</sub>, TMS) δ 201.9, 186.0, 171.7, 169.9, 145.4, 142.3, 140.8, 137.3, 135.4, 130.3, 128.0, 127.0, 124.9, 103.9, 78.9, 64.5, 62.2, 61.6, 55.3, 53.9, 37.8, 34.7, 34.6, 29.3, 29.1, 20.6, 14.0, 13.2; IR (neat): ν 2956.69, 2906.78, 2865.03, 1959.67, 1730.82, 1658.78, 1637.57, 1366.11, 1251.87, 1203.89, 811.73, 731.10 cm<sup>-1</sup>; HRMS (ESI-TOF) Calcd for C<sub>33</sub>H<sub>43</sub>O<sub>5</sub> [M+H]<sup>+</sup> : 519.3105, found: 519.3102.

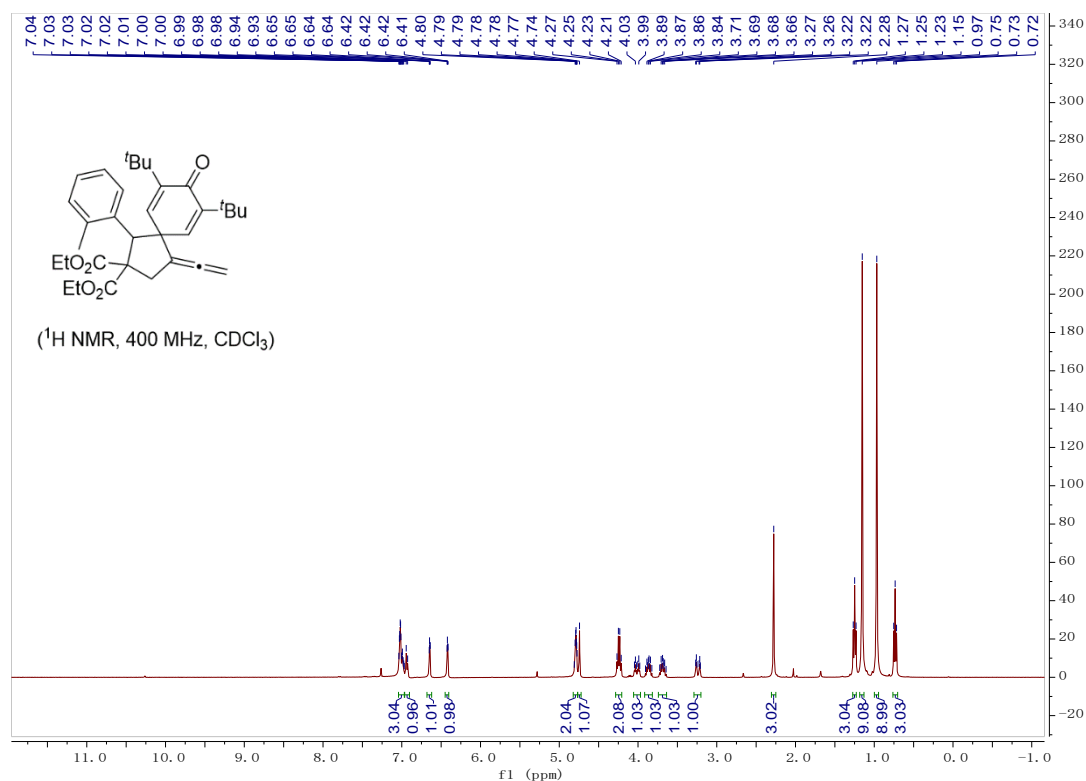

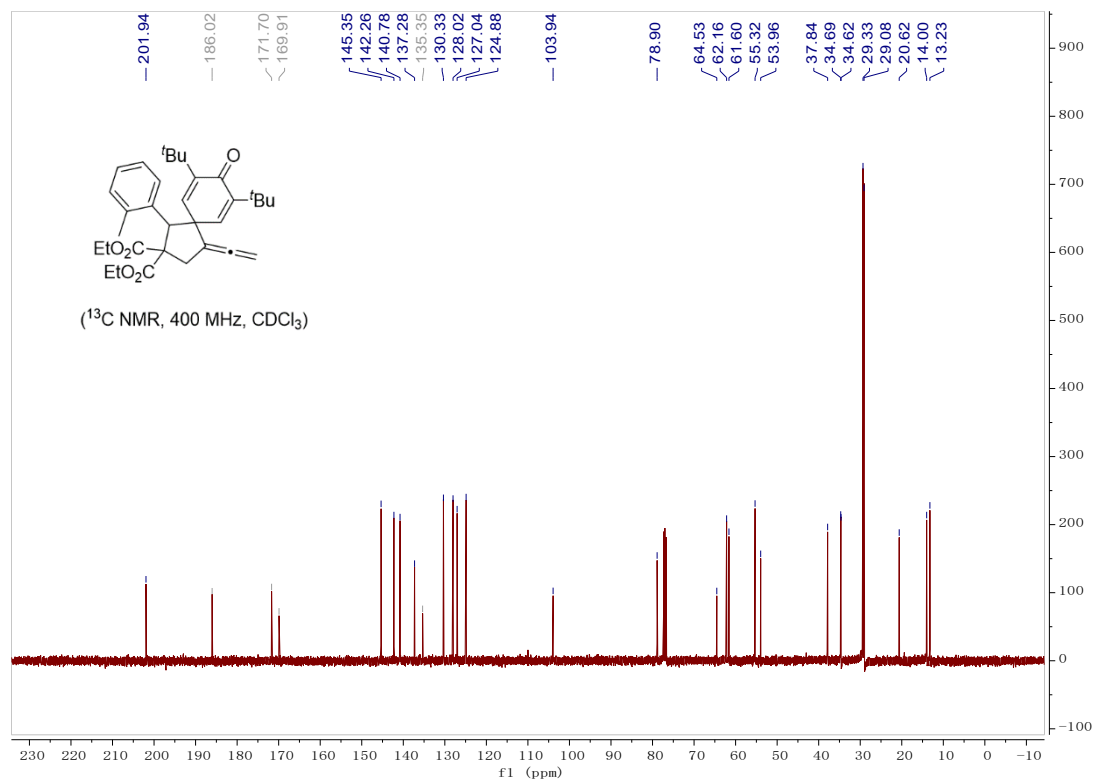

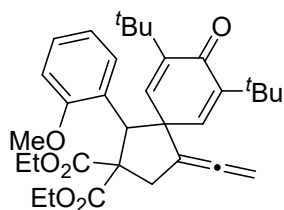

**diethyl 7,9-di-*tert*-butyl-1-(2-methoxyphenyl)-8-oxo-4-vinylidenespiro[4.5]deca-6,9-diene-2,2-dicarboxylate (30):** Yield: 0.0336 g, 63%, a pale yellow solid, m.p. 104-106 °C; Eluent: PE/EA = 30/1.  $^1\text{H}$  NMR (400 MHz,  $\text{CDCl}_3$ , TMS)  $\delta$  7.04 (t,  $J = 7.8$  Hz, 1H), 6.83 (d,  $J = 7.8$  Hz, 1H), 6.71 – 6.63 (m, 3H), 6.52 (s, 1H), 4.97 (s, 1H), 4.80 – 4.64 (m, 2H), 4.24 – 4.11 (m, 2H), 3.96 – 3.84 (m, 2H), 3.81 – 3.72 (m, 1H), 3.66 (s, 3H), 3.18 – 3.07 (m, 1H), 1.17 (t,  $J = 7.2$  Hz, 3H), 1.09 (s, 9H), 0.92 (s, 9H), 0.78 (t,  $J = 7.2$  Hz, 3H);  $^{13}\text{C}\{^1\text{H}\}$ -NMR (100 MHz,  $\text{CDCl}_3$ , TMS)  $\delta$  202.0, 186.3, 171.7, 170.4, 157.2, 145.5, 144.9, 143.2, 140.4, 129.6, 128.3, 125.3, 119.3, 110.4, 103.8, 78.6, 63.8, 62.0, 61.5, 55.3, 54.0, 52.1, 38.60, 34.6, 34.6, 29.5, 29.2, 14.0, 13.4; IR (neat):  $\nu$  2956.15, 2912.08, 2865.11, 1959.72, 1730.86, 1658.87, 1636.39, 1365.30, 1247.86, 1219.26, 822.29, 755.22  $\text{cm}^{-1}$ ; HRMS (ESI-TOF) Calcd for  $\text{C}_{33}\text{H}_{43}\text{O}_6$   $[\text{M}+\text{H}]^+$  : 535.3054, found: 535.3051.

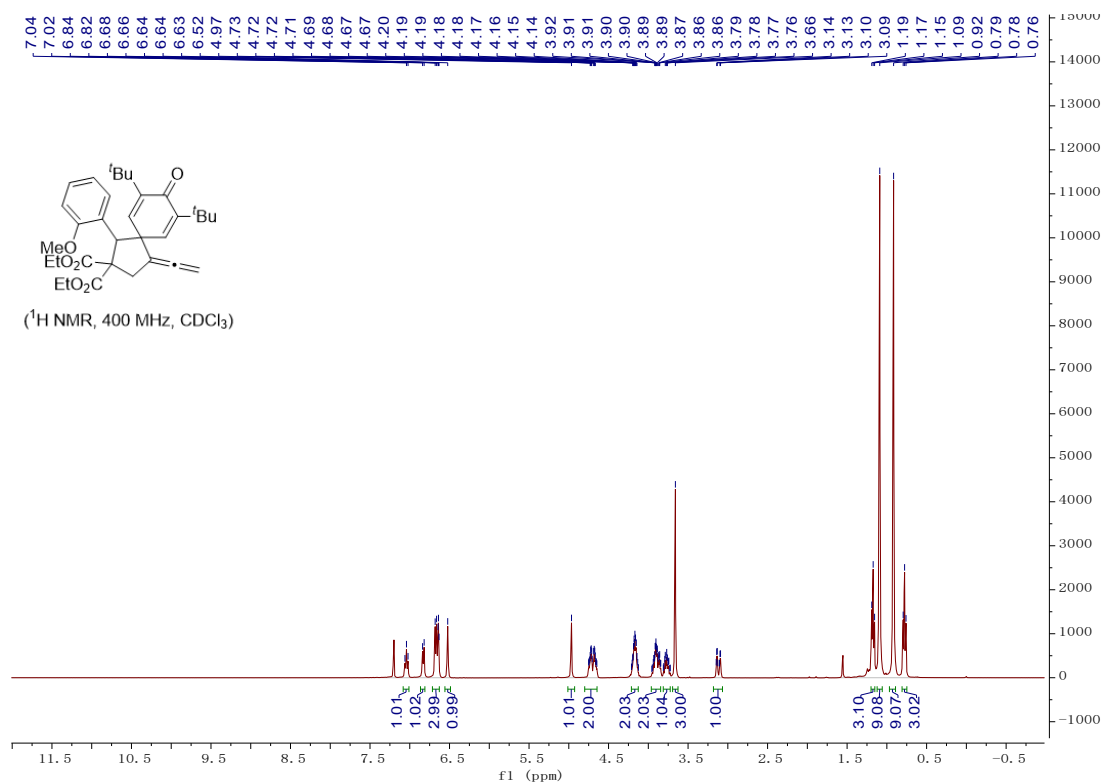

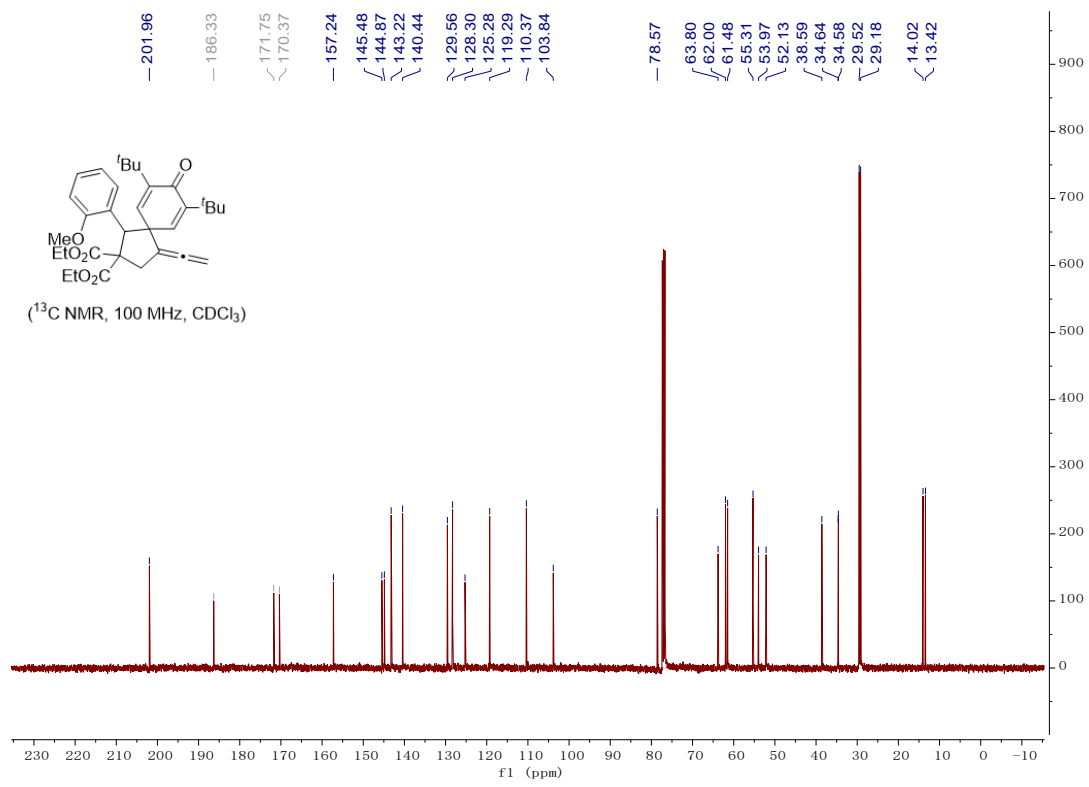

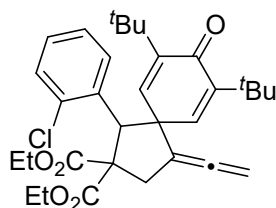

**diethyl 7,9-di-*tert*-butyl-1-(2-chlorophenyl)-8-oxo-4-vinylidenespiro[4.5]deca-6,9-diene-2,2-dicarboxylate (3p):** Yield: 0.0457 g, 85%, a pale yellow solid, m.p. 140-146 °C; Eluent: PE/EA = 30/1.  $^1\text{H}$  NMR (400 MHz,  $\text{CDCl}_3$ , TMS)  $\delta$  7.26 (d,  $J = 8.4$  Hz, 1H), 7.10 – 6.99 (m, 2H), 6.95 (d,  $J = 7.8$  Hz, 1H), 6.63 (d,  $J = 2.8$  Hz, 1H), 6.60 (d,  $J = 2.8$  Hz, 1H), 5.12 (s, 1H), 4.87 – 4.72 (m, 2H), 4.27 – 4.16 (m, 2H), 4.05 – 3.89 (m, 2H), 3.79 (dq,  $J = 10.6, 7.2$  Hz, 1H), 3.21 (dt,  $J = 17.0, 3.2$  Hz, 1H), 1.22 (t,  $J = 7.2$  Hz, 3H), 1.11 (s, 9H), 1.03 (s, 9H), 0.85 (t,  $J = 7.2$  Hz, 3H);  $^{13}\text{C}\{^1\text{H}\}$ -NMR (100 MHz,  $\text{CDCl}_3$ , TMS)  $\delta$  201.89, 185.82, 171.23, 170.43, 146.39, 146.09, 141.86, 139.07, 135.71, 133.79, 129.97, 129.58, 128.41, 125.21, 103.49, 79.06, 63.69, 62.16, 61.77, 55.70, 54.32, 37.91, 34.83, 34.63, 29.18, 29.17, 13.94, 13.36; IR (neat):  $\nu$  3000.71, 2958.08, 2909.39, 2865.03, 1964.89, 1713.25, 1659.63, 1437.88, 1219.70, 1030.84, 882.16, 759.66  $\text{cm}^{-1}$ ; HRMS (ESI-TOF) Calcd for  $\text{C}_{32}\text{H}_{40}\text{ClO}_5$   $[\text{M}+\text{H}]^+$  : 539.2559, found: 539.2558.

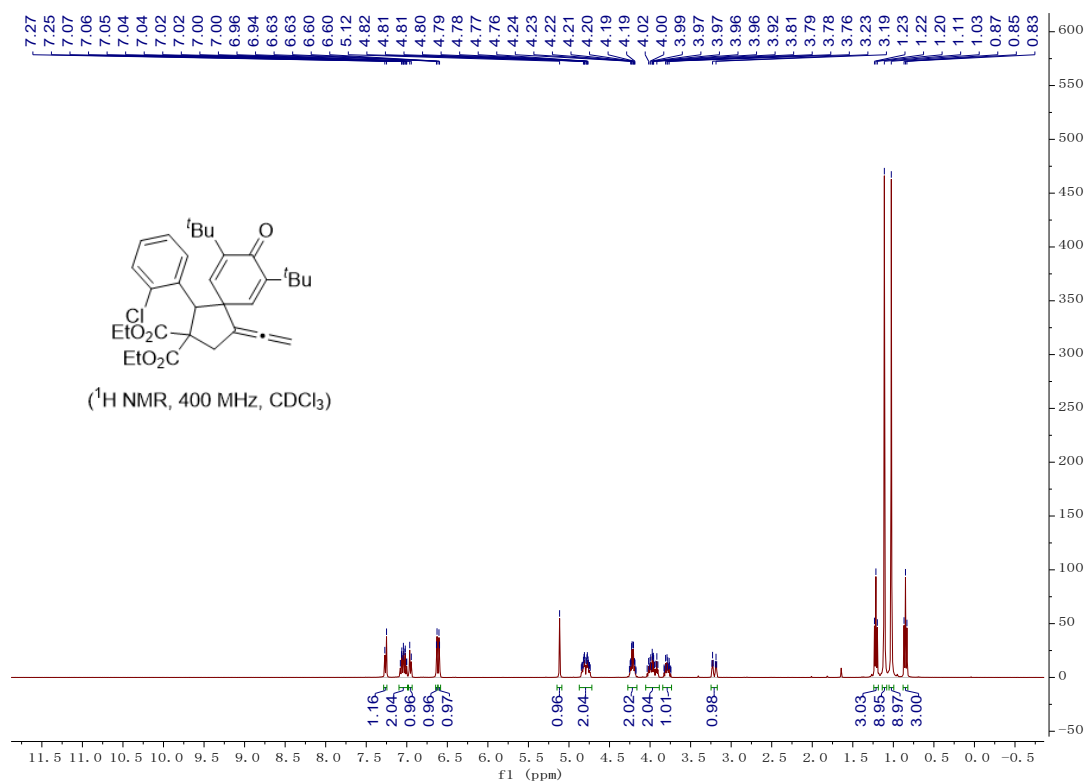

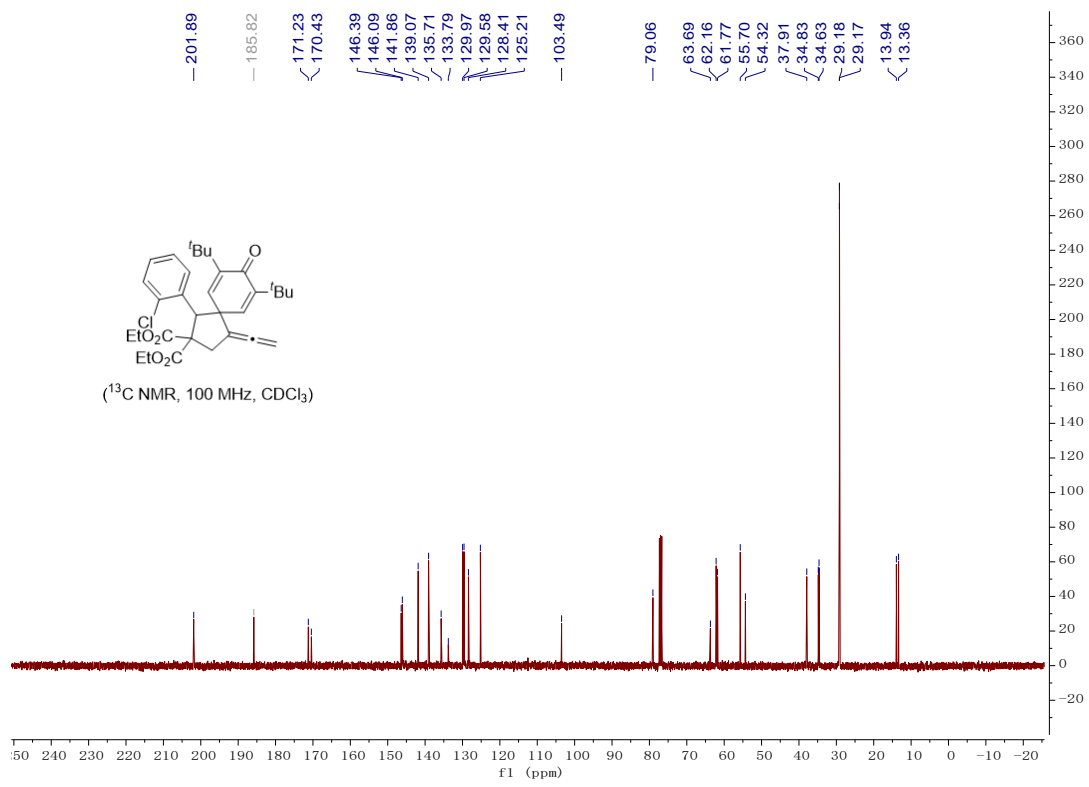



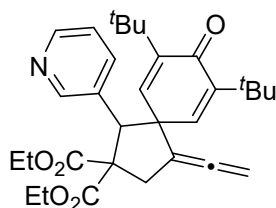

**diethyl 7,9-di-*tert*-butyl-8-oxo-1-(pyridin-3-yl)-4-vinylidenespiro[4.5]deca-6,9-diene-2,2-dicarboxylate (3q):** Yield: 0.0328 g, 65%, a colorless oil; Eluent: PE/EA = 4/1.  $^1\text{H}$  NMR (400 MHz,  $\text{CDCl}_3$ , TMS)  $\delta$  8.35 (s, 1H), 8.28 (s, 1H), 7.30 (d,  $J = 8.0$  Hz, 1H), 7.06 – 6.96 (m, 1H), 6.83 (d,  $J = 3.0$  Hz, 1H), 6.38 (d,  $J = 3.0$  Hz, 1H), 4.83 – 4.71 (m, 2H), 4.22 – 4.09 (m, 3H), 4.05 – 3.96 (m, 1H), 3.91 (dt,  $J = 17.0, 5.2$  Hz, 1H), 3.77 – 3.69 (m, 1H), 3.05 (dt,  $J = 17.0, 3.2$  Hz, 1H), 1.17 (t,  $J = 7.2$  Hz, 3H), 1.08 (s, 9H), 1.01 (s, 9H), 0.83 (t,  $J = 7.2$  Hz, 3H);  $^{13}\text{C}$   $\{^1\text{H}\}$ -NMR (100 MHz,  $\text{CDCl}_3$ , TMS)  $\delta$  201.7, 185.7, 171.3, 170.5, 151.2, 148.8, 148.3, 146.6, 141.7, 138.6, 136.9, 131.4, 122.0, 103.5, 79.4, 63.1, 62.2, 62.0, 59.4, 54.2, 37.3, 35.1, 34.8, 29.4, 29.2, 14.0, 13.5; IR (neat):  $\nu$  2957.20, 2912.00, 2862.42, 1957.06, 1725.40, 1659.38, 1637.83, 1461.36, 1257.33, 1098.68, 1026.85, 732.13, 714.80  $\text{cm}^{-1}$ ; HRMS (ESI-TOF) Calcd for  $\text{C}_{31}\text{H}_{40}\text{NO}_5$   $[\text{M}+\text{H}]^+$  : 506.2901, found: 506.2898.

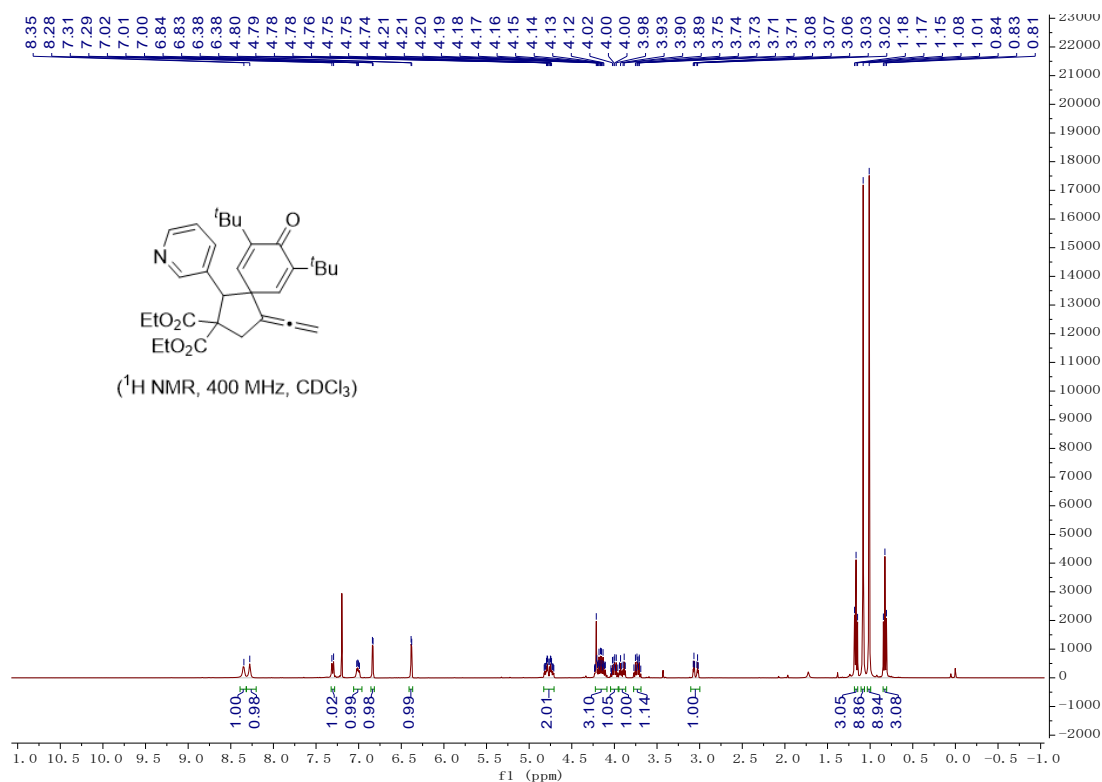

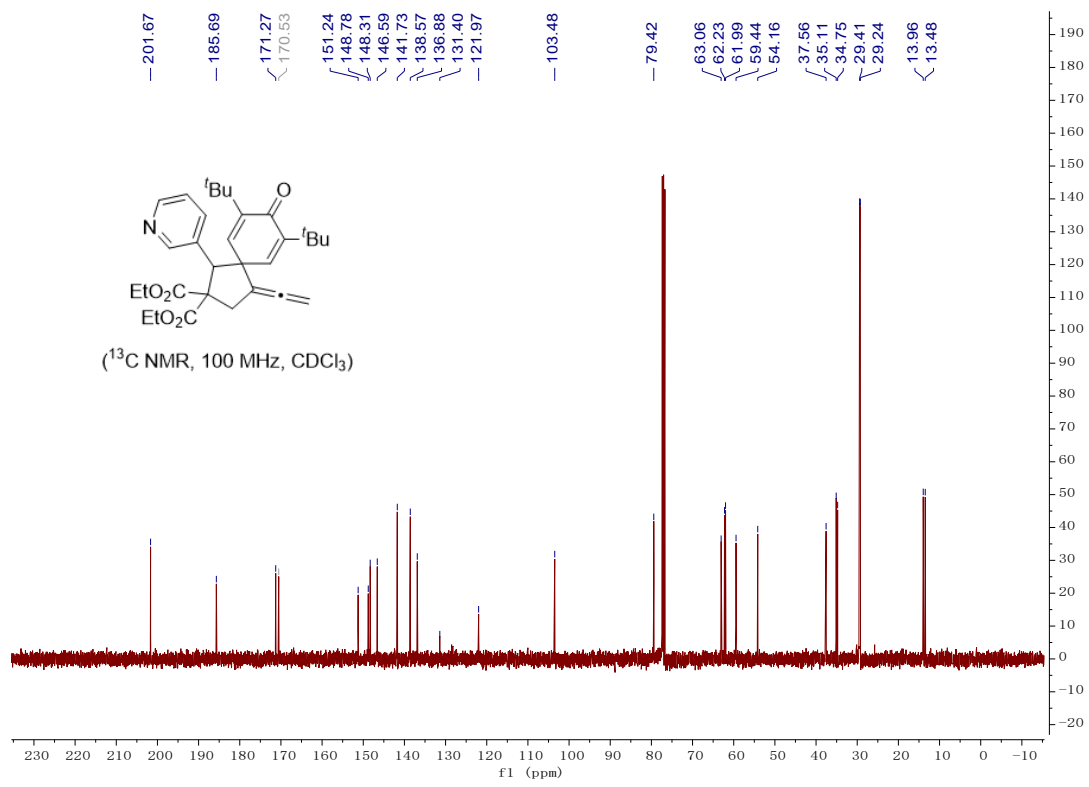

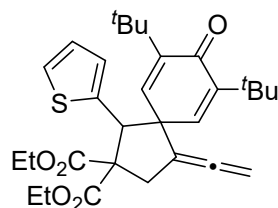

**diethyl 7,9-di-*tert*-butyl-8-oxo-1-(thiophen-2-yl)-4-vinylidenespiro[4.5]deca-6,9-diene-2,2-dicarboxylate (3r):** Yield: 0.0377 g, 74%, a pale yellow solid, m.p. 92-94 °C; Eluent: PE/EA = 30/1. <sup>1</sup>H NMR (400 MHz, CDCl<sub>3</sub>, TMS) δ 6.99 (d, *J* = 4.8 Hz, 1H), 6.90 (d, *J* = 2.8 Hz, 1H), 6.81 – 6.73 (m, 2H), 6.37 (d, *J* = 2.8 Hz, 1H), 4.79 – 4.67 (m, 2H), 4.60 (s, 1H), 4.26 – 4.10 (m, 2H), 4.01 – 3.90 (m, 1H), 3.84 (dt, *J* = 16.8, 5.2 Hz, 1H), 3.71 (dq, *J* = 10.8, 7.2 Hz, 1H), 3.00 (dt, *J* = 16.8, 3.2 Hz, 1H), 1.19 (t, *J* = 7.2 Hz, 3H), 1.13 (s, 9H), 1.06 (s, 9H), 0.84 (t, *J* = 7.2 Hz, 3H); <sup>13</sup>C{<sup>1</sup>H}-NMR (100 MHz, CDCl<sub>3</sub>, TMS) δ 201.5, 186.0, 171.4, 170.3, 148.2, 146.4, 142.0, 139.1, 137.6, 127.6, 125.9, 124.4, 103.6, 79.2, 64.0, 62.1, 61.9, 56.3, 54.2, 37.3, 35.1, 34.8, 29.5, 29.1, 14.0, 13.4; IR (neat): ν 2957.00, 2909.39, 2865.03, 1962.28, 1724.08, 1658.99, 1637.99, 1258.43, 1207.00, 1178.16, 1034.15, 856.58 cm<sup>-1</sup>; HRMS (ESI-TOF) Calcd for C<sub>30</sub>H<sub>39</sub>O<sub>5</sub>S [M+H]<sup>+</sup> : 511.2513, found: 511.2511.

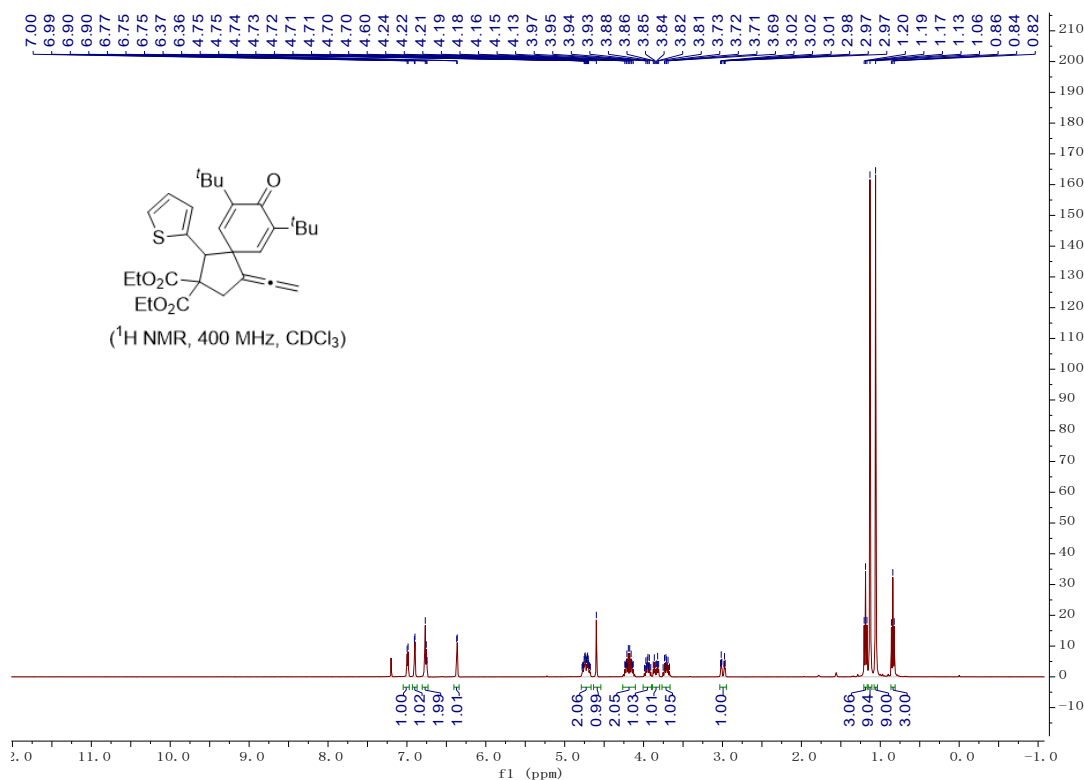

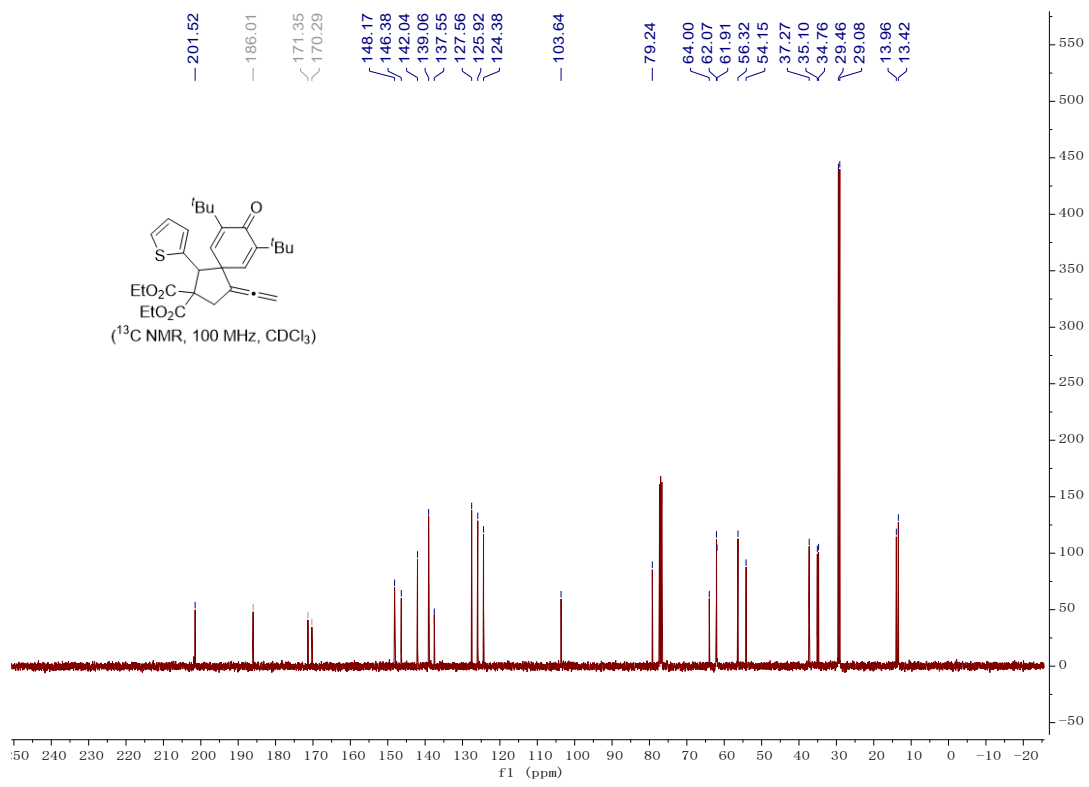

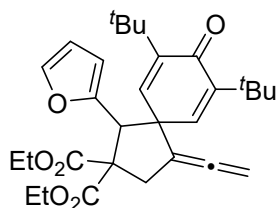

**diethyl 7,9-di-*tert*-butyl-1-(furan-2-yl)-8-oxo-4-vinylidenespiro[4.5]deca-6,9-diene-2,2-dicarboxylate (3s):** Yield: 0.0371 g, 75%, a colorless oil; Eluent: PE/EA = 30/1.  $^1\text{H}$  NMR (400 MHz,  $\text{CDCl}_3$ , TMS)  $\delta$  7.14 (s, 1H), 6.72 (d,  $J = 3.0$  Hz, 1H), 6.42 (d,  $J = 3.0$  Hz, 1H), 6.14 – 6.09 (m, 1H), 5.96 (d,  $J = 3.2$  Hz, 1H), 4.76 – 4.67 (m, 2H), 4.38 (s, 1H), 4.25 – 4.13 (m, 2H), 4.05 – 3.96 (m, 1H), 3.87 – 3.78 (m, 2H), 2.97 (dt,  $J = 16.6, 3.2$  Hz, 1H), 1.19 (t,  $J = 7.2$  Hz, 3H), 1.10 (s, 9H), 1.06 (s, 9H), 0.94 (t,  $J = 7.2$  Hz, 3H);  $^{13}\text{C}\{^1\text{H}\}$ -NMR (100 MHz,  $\text{CDCl}_3$ , TMS)  $\delta$  201.8, 186.2, 171.2, 169.8, 150.2, 147.5, 144.8, 141.9, 141.6, 139.7, 110.2, 109.3, 103.5, 79.2, 62.6, 62.2, 61.9, 54.1, 53.5, 37.5, 34.79, 34.77, 29.6, 29.2, 14.0, 13.6; IR (neat):  $\nu$  2956.93, 2904.17, 2862.42, 1962.28, 1729.19, 1659.52, 1638.45, 1366.43, 1258.09, 1198.95, 1012.24, 882.53, 731.89  $\text{cm}^{-1}$ ; HRMS (ESI-TOF) Calcd for  $\text{C}_{30}\text{H}_{39}\text{O}_6$   $[\text{M}+\text{H}]^+$  : 495.2741, found: 495.2739.

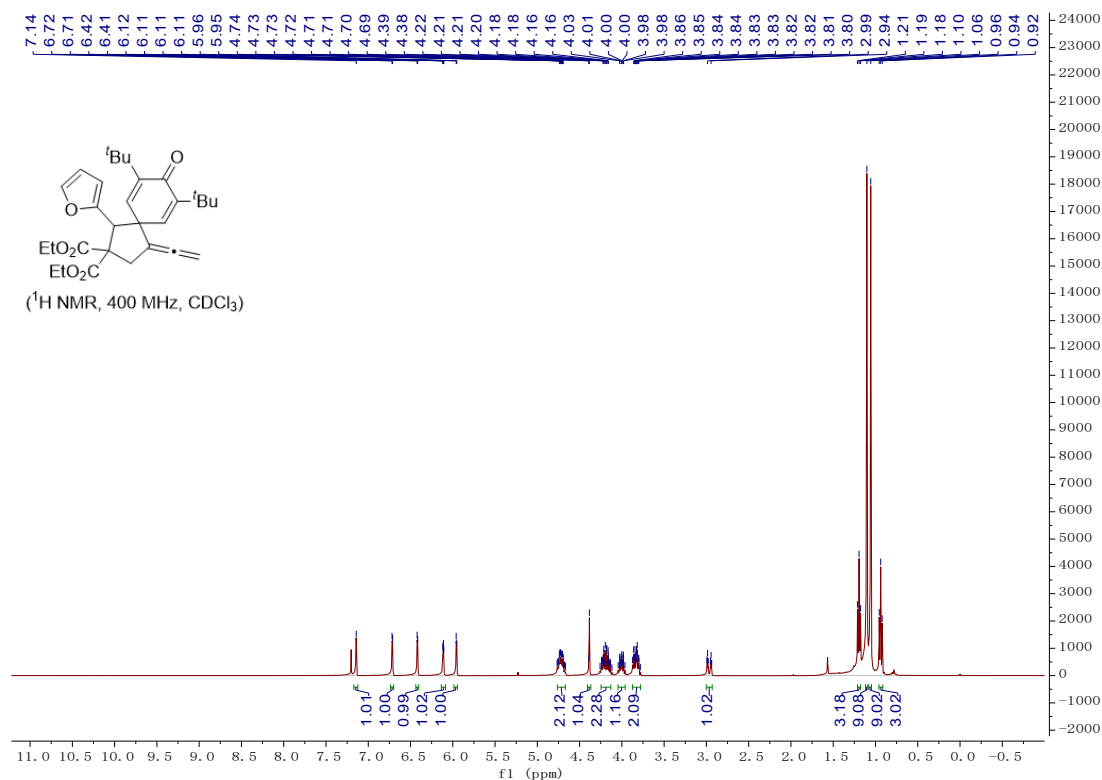

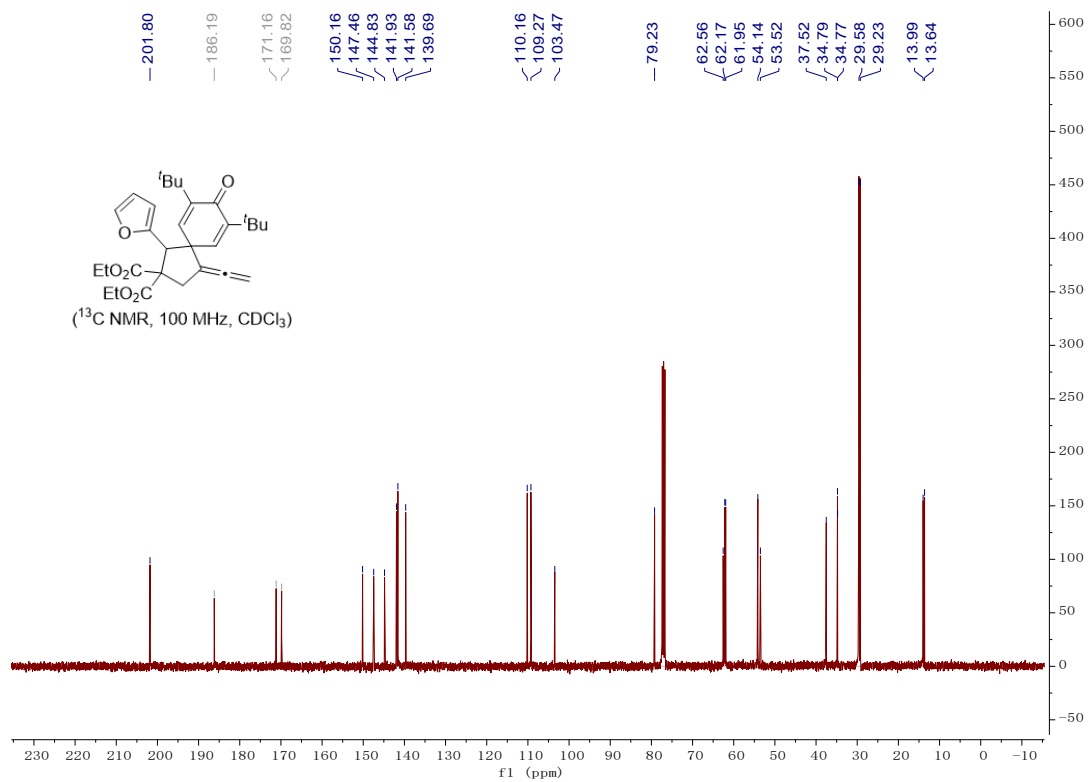

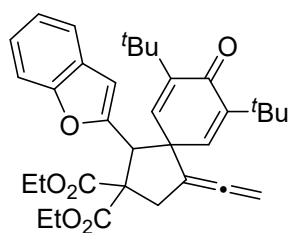

**diethyl 1-(benzofuran-2-yl)-7,9-di-*tert*-butyl-8-oxo-4-vinylidenespiro[4.5]deca-6,9-diene-2,2-dicarboxylate (3t):** Yield: 0.0370 g, 68%, a colorless oil; Eluent: PE/EA = 30/1.  $^1\text{H}$  NMR (400 MHz,  $\text{CDCl}_3$ , TMS)  $\delta$  7.36 (d,  $J = 7.2$  Hz, 1H), 7.20 (d,  $J = 5.0$  Hz, 1H), 7.14 – 7.04 (m, 2H), 6.88 (d,  $J = 2.6$  Hz, 1H), 6.45 (d,  $J = 2.6$  Hz, 1H), 6.40 (s, 1H), 4.80 – 4.69 (m, 2H), 4.51 (s, 1H), 4.27 – 4.13 (m, 2H), 4.01 – 3.87 (m, 2H), 3.71 (dq,  $J = 10.8, 7.2$  Hz, 1H), 2.98 (dt,  $J = 16.6, 3.2$  Hz, 1H), 1.19 (t,  $J = 7.2$  Hz, 3H), 1.09 (s, 9H), 1.00 (s, 9H), 0.67 (t,  $J = 7.2$  Hz, 3H);  $^{13}\text{C}\{^1\text{H}\}$ -NMR (100 MHz,  $\text{CDCl}_3$ , TMS)  $\delta$  201.8, 186.0, 171.1, 169.9, 154.5, 152.8, 148.0, 144.6, 141.7, 139.5, 127.8, 124.0, 122.6, 120.8, 110.6, 106.4, 103.5, 79.5, 62.3, 62.2, 62.1, 54.7, 53.5, 37.6, 34.80, 34.77, 29.6, 29.2, 14.0, 13.3; IR (neat):  $\nu$  2956.78, 2862.42, 2257.11, 1962.28, 1729.32, 1659.79, 1637.98, 1454.89, 1253.04, 1191.13, 882.34, 734.25  $\text{cm}^{-1}$ ; HRMS (ESI-TOF) Calcd for  $\text{C}_{34}\text{H}_{41}\text{O}_6$   $[\text{M}+\text{H}]^+$  : 545.2898, found: 545.2897.

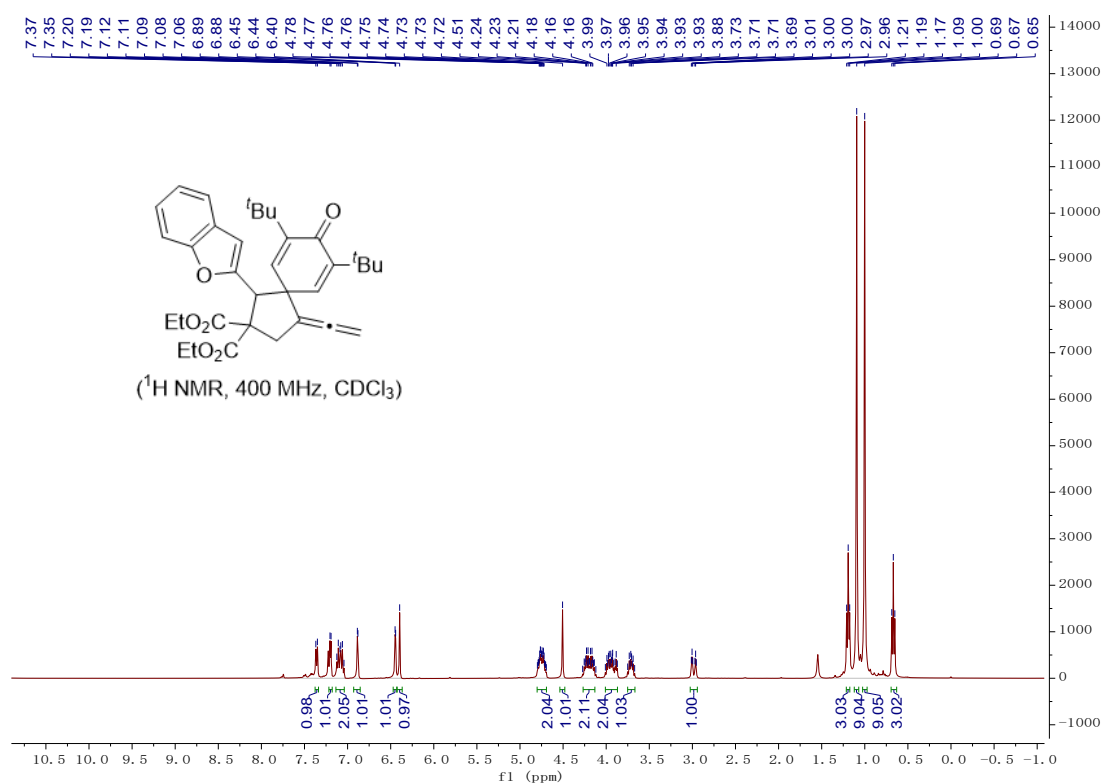

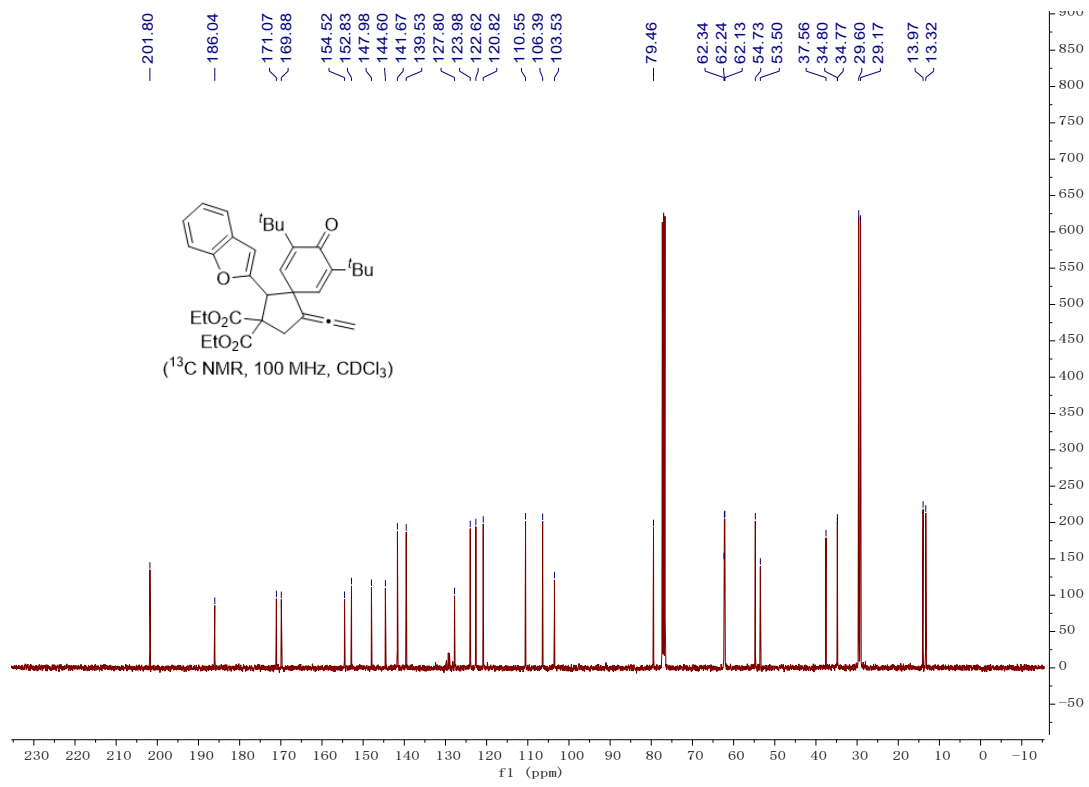



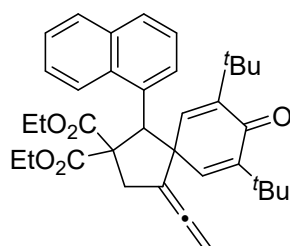

**diethyl 7,9-di-tert-butyl-1-(naphthalen-1-yl)-8-oxo-4-vinylidenespiro[4.5]deca-6,9-diene-2,2-dicarboxylate (3u):** Yield: 0.0460 g, 83%, a colorless solid, m.p. 165-167 °C; Eluent: PE/EA = 30/1. <sup>1</sup>H NMR (400 MHz, CDCl<sub>3</sub>, TMS) δ 8.11 (d, *J* = 8.4 Hz, 1H), 7.73 (d, *J* = 7.8 Hz, 1H), 7.65 (d, *J* = 8.0 Hz, 1H), 7.46 – 7.36 (m, 2H), 7.30 – 7.25 (m, 1H), 7.16 (d, *J* = 7.4 Hz, 1H), 6.80 – 6.71 (m, 1H), 6.41 – 6.33 (m, 1H), 5.44 (s, 1H), 4.85 – 4.74 (m, 2H), 4.30 – 4.21 (m, 2H), 4.14 – 4.05 (m, 1H), 3.93 – 3.80 (m, 1H), 3.74 – 3.62 (m, 1H), 3.33 (d, *J* = 16.8 Hz, 1H), 1.23 (t, *J* = 7.0 Hz, 3H), 1.04 (s, 9H), 0.74 (s, 9H), 0.58 (t, *J* = 7.0 Hz, 3H); <sup>13</sup>C{<sup>1</sup>H}-NMR (100 MHz, CDCl<sub>3</sub>, TMS) δ 202.0, 185.6, 171.8, 170.1, 145.8, 145.2, 142.4, 140.1, 133.7, 133.2, 132.6, 128.7, 127.9, 126.2, 125.5, 125.4, 123.9, 123.6, 103.7, 78.9, 64.7, 62.3, 61.6, 54.0, 53.6, 38.3, 34.6, 34.5, 29.2, 28.9, 14.0, 13.3; IR (neat): ν 2956.13, 2918.47, 2865.03, 1962.28, 1731.30, 1659.24, 1638.37, 1458.75, 1259.48, 1200.44, 1158.69, 882.11, 781.50 cm<sup>-1</sup>; HRMS (ESI-TOF) Calcd for C<sub>36</sub>H<sub>43</sub>O<sub>5</sub> [M+H]<sup>+</sup> : 555.3105, found: 555.3103.

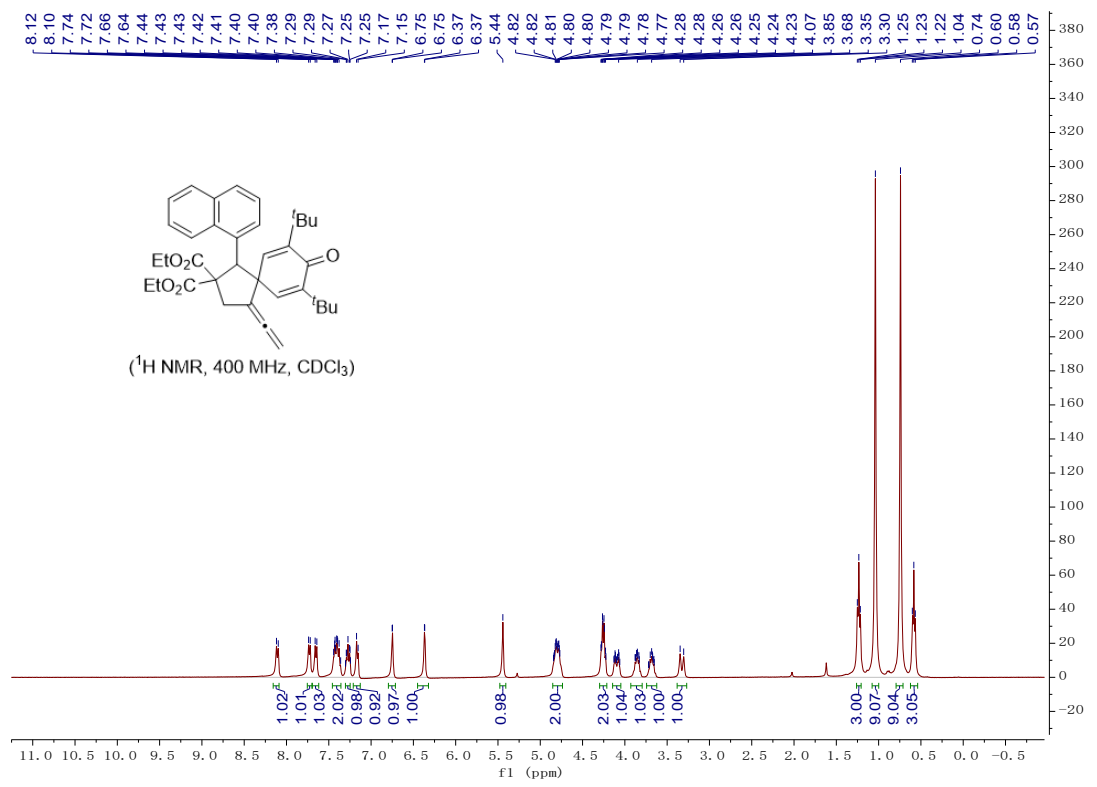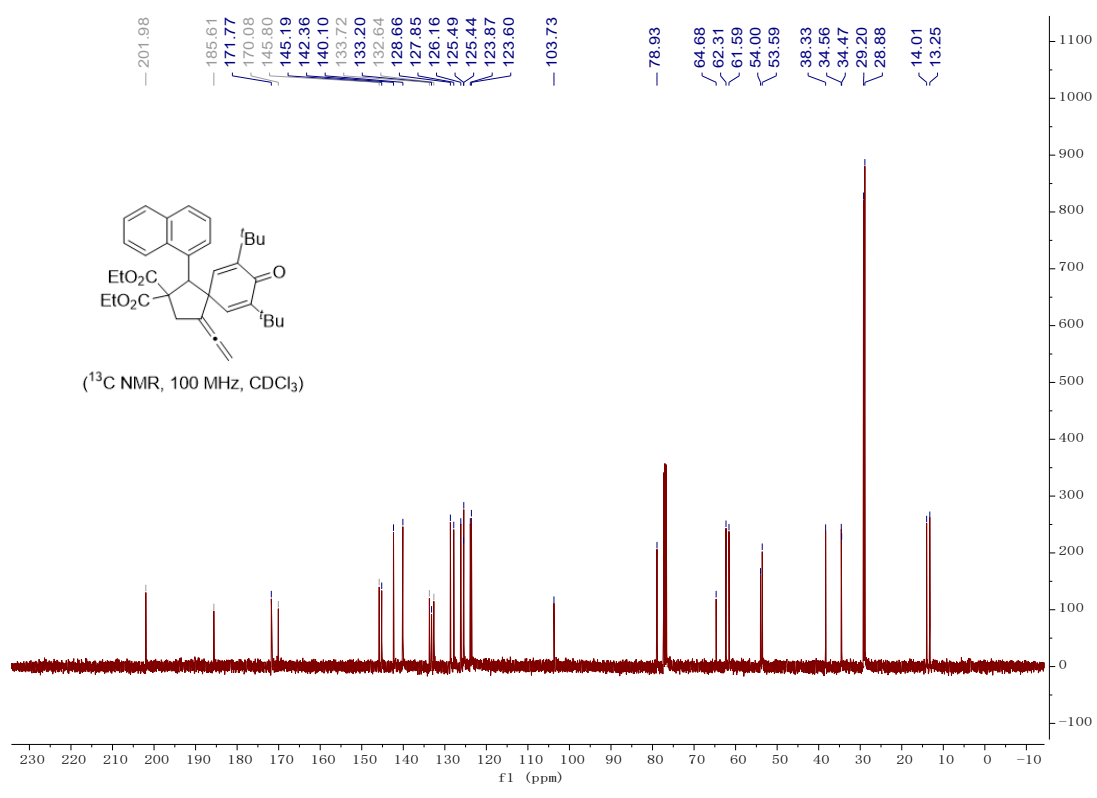

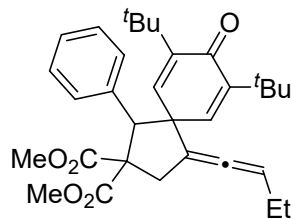

**dimethyl 4-(but-1-en-1-ylidene)-7,9-di-*tert*-butyl-8-oxo-1-phenylspiro[4.5]deca-6,9-diene-2,2-dicarboxylate (3v):** Yield: 0.0151 g, 30%, dr = 2.3:1, a colorless oil; Eluent: PE/EA = 30/1.  $^1\text{H}$  NMR (400 MHz,  $\text{CDCl}_3$ , TMS)  $\delta$  7.13 – 7.05 (m, 3H), 7.02 – 6.93 (m, 2H), 6.83 – 6.68 (m, 1H), 6.50 – 6.38 (m, 1H), 5.32 – 5.21 (m, 1H), 4.29 – 4.23 (m, 1H), 3.94 – 3.83 (m, 1H), 3.75 – 3.66 (m, 3H), 3.32 (s, 3H), 3.05 (d,  $J = 17.0$  Hz, 1H), 1.95 – 1.76 (m, 2H), 1.04 (s, 12.5H), 1.01 (s, 5.5H), 0.90 (t,  $J = 7.4$  Hz, 1.7H), 0.80 (t,  $J = 7.4$  Hz, 1.3H);  $^{13}\text{C}\{^1\text{H}\}$ -NMR (100 MHz,  $\text{CDCl}_3$ , TMS)  $\delta$  197.01, 196.96, 186.15, 186.11, 172.23, 172.21, 171.18, 171.01, 147.08, 146.64, 145.30, 144.99, 143.01, 142.77, 140.56, 140.07, 136.11, 136.03, 129.62, 129.57, 127.54, 127.52, 127.46, 127.45, 105.21, 104.92, 97.92, 97.62, 63.72, 63.67, 61.67, 61.66, 54.70, 54.58, 53.19, 53.17, 52.52, 38.28, 37.99, 34.89, 34.84, 34.67, 34.56, 29.49, 29.39, 29.21, 29.14, 21.98, 21.88, 13.20, 13.10; IR (neat):  $\nu$  2954.53, 1970.11, 1729.64, 1685.31, 1636.79, 1455.76, 1434.40, 1253.22, 1201.20, 1163.19, 1030.84, 909.46, 878.22, 732.96  $\text{cm}^{-1}$ ; HRMS (ESI-TOF) Calcd for  $\text{C}_{32}\text{H}_{41}\text{O}_5$   $[\text{M}+\text{H}]^+$  : 505.2959, found: 505.2949.

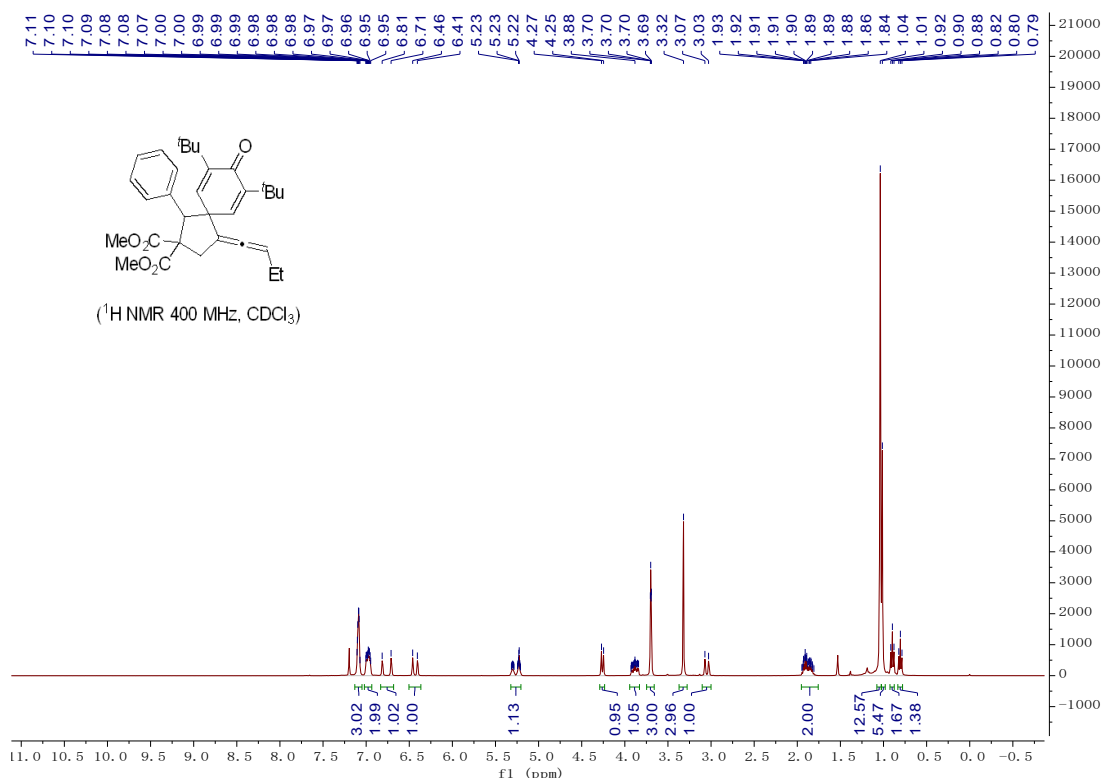

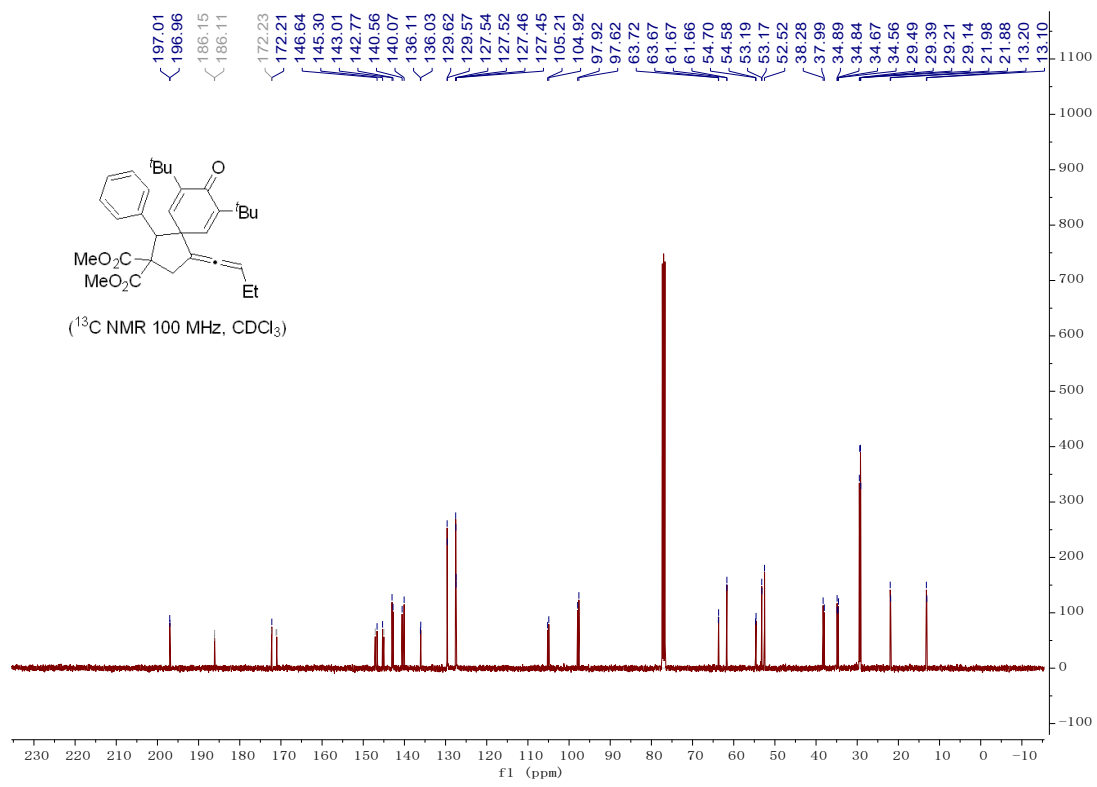

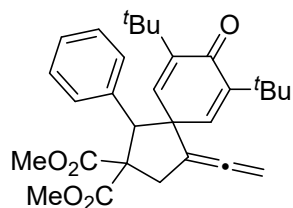

**dimethyl 7,9-di-*tert*-butyl-8-oxo-1-phenyl-4-vinylidenespiro[4.5]deca-6,9-diene-2,2-dicarboxylate (3w):** Yield: 0.0301 g, 63%, a colorless oil; Eluent: PE/EA = 30/1.  $^1\text{H}$  NMR (400 MHz,  $\text{CDCl}_3$ , TMS)  $\delta$  7.12 – 7.07 (m, 3H), 6.98 – 6.92 (m, 2H), 6.78 (d,  $J = 3.0$  Hz, 1H), 6.40 (d,  $J = 3.0$  Hz, 1H), 4.80 – 4.68 (m, 2H), 4.24 (s, 1H), 3.94 (dt,  $J = 17.0, 5.2$  Hz, 1H), 3.70 (s, 3H), 3.33 (s, 3H), 3.07 (dt,  $J = 17.0, 3.2$  Hz, 1H), 1.05 (s, 9H), 1.03 (s, 9H);  $^{13}\text{C}\{^1\text{H}\}$ -NMR (100 MHz,  $\text{CDCl}_3$ , TMS)  $\delta$  201.6, 186.0, 172.2, 171.1, 147.5, 145.8, 142.2, 139.4, 135.6, 129.7, 127.6, 127.5, 103.7, 79.1, 63.5, 62.2, 54.3, 53.2, 52.6, 37.8, 35.0, 34.7, 29.4, 29.2; IR (neat):  $\nu$  3003.40, 2954.39, 2862.51, 1959.72, 1728.95, 1713.95, 1659.38, 1637.21, 1455.76, 1357.94, 1254.89, 1219.27, 1165.25, 1088.97, 877.42  $\text{cm}^{-1}$ ; HRMS (DART) Calcd for  $\text{C}_{30}\text{H}_{37}\text{O}_5$   $[\text{M}+\text{H}]^+$  : 477.2636, found: 477.2634.

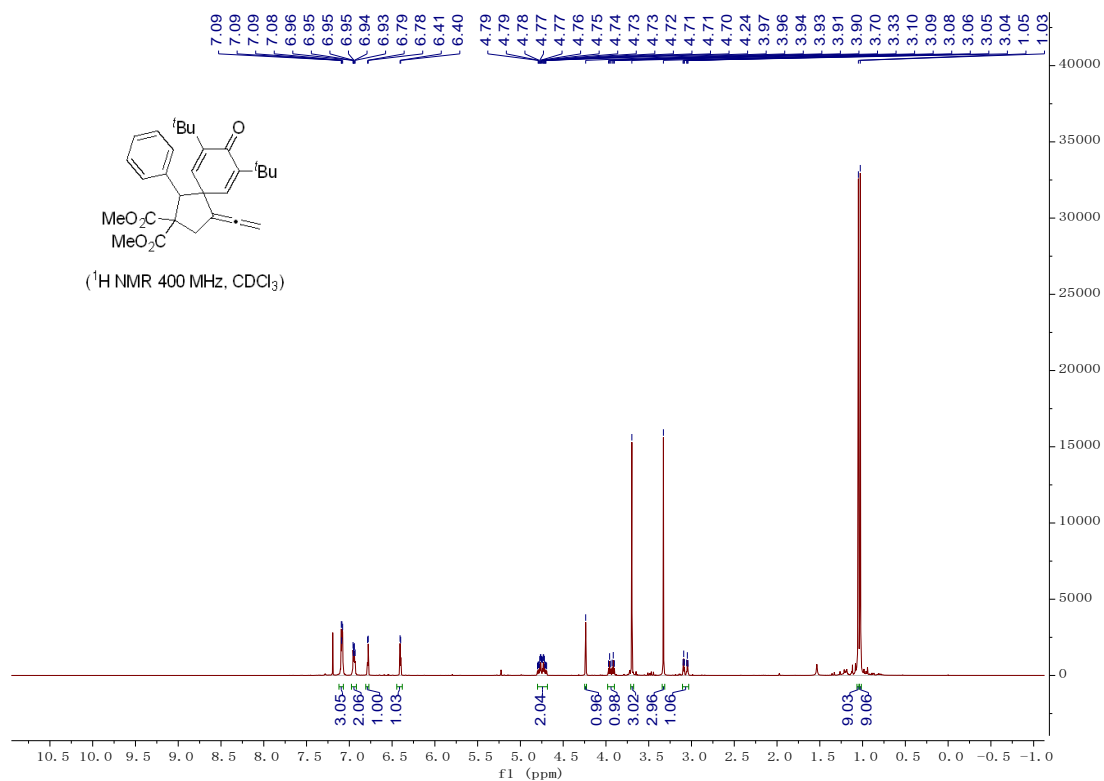

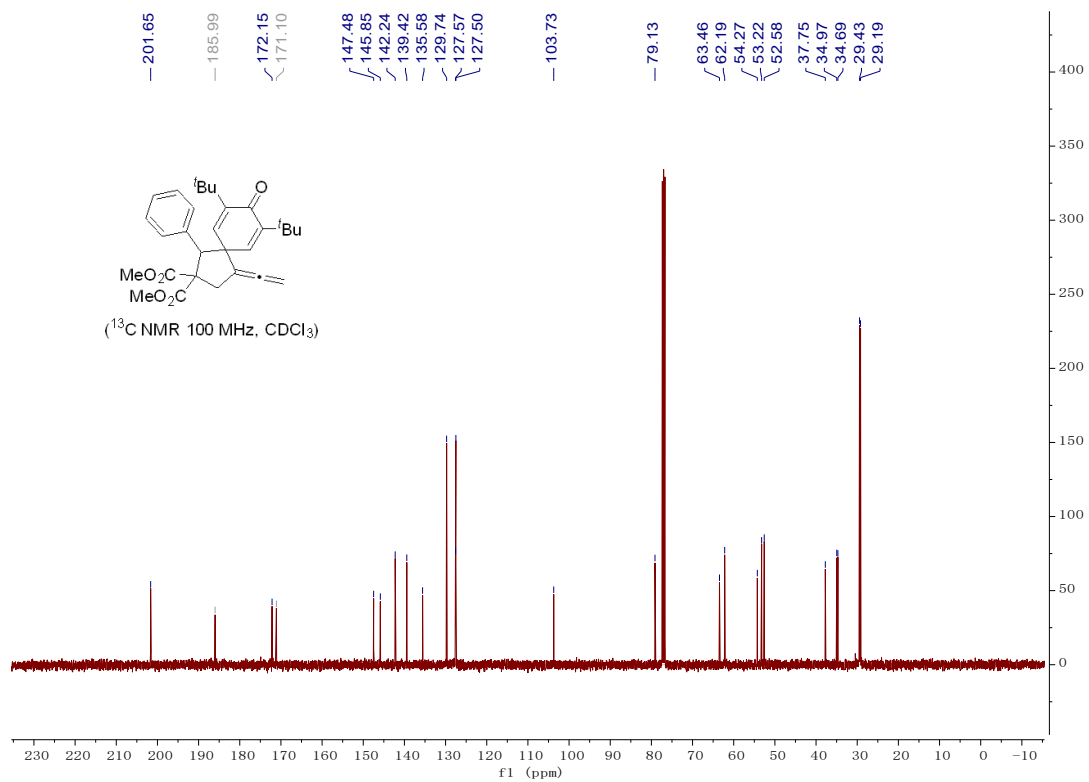

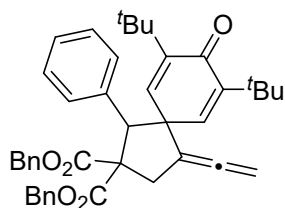

**dibenzyl 7,9-di-*tert*-butyl-8-oxo-1-phenyl-4-vinylidenespiro[4.5]deca-6,9-diene-2,2-dicarboxylate (3x):** Yield: 0.0490 g, 78%, a colorless oil; Eluent: PE/EA = 30/1.  $^1\text{H}$  NMR (400 MHz,  $\text{CDCl}_3$ , TMS)  $\delta$  7.19 – 7.12 (m, 4H), 7.11 – 7.00 (m, 7H), 6.98 – 6.93 (m, 2H), 6.77 – 6.68 (m, 3H), 6.43 (d,  $J = 3.0$  Hz, 1H), 5.08 – 4.95 (m, 2H), 4.80 (d,  $J = 12.4$  Hz, 1H), 4.76 – 4.67 (m, 2H), 4.51 (d,  $J = 12.4$  Hz, 1H), 4.27 (s, 1H), 3.94 (dt,  $J = 17.0, 5.2$  Hz, 1H), 3.09 (dt,  $J = 17.0, 3.0$  Hz, 1H), 1.02 (s, 9H), 1.01 (s, 9H);  $^{13}\text{C}\{^1\text{H}\}$ -NMR (100 MHz,  $\text{CDCl}_3$ , TMS)  $\delta$  201.7, 186.0, 171.3, 170.3, 147.2, 145.7, 142.3, 139.7, 135.8, 135.0, 134.5, 129.8, 128.5, 128.4, 128.3, 128.19, 128.16, 128.0, 127.65, 127.56, 103.7, 79.1, 67.9, 67.6, 63.8, 61.9, 54.2, 38.0, 34.9, 34.7, 29.5, 29.2; IR (neat):  $\nu$  3003.40, 2959.05, 2865.11, 1962.33, 1711.81, 1659.34, 1358.94, 1220.12, 1163.54, 1131.12, 1090.95, 907.46, 868.96  $\text{cm}^{-1}$ ; HRMS (DART) Calcd for  $\text{C}_{42}\text{H}_{45}\text{O}_5$   $[\text{M}+\text{H}]^+$  : 629.3262, found: 629.3265.

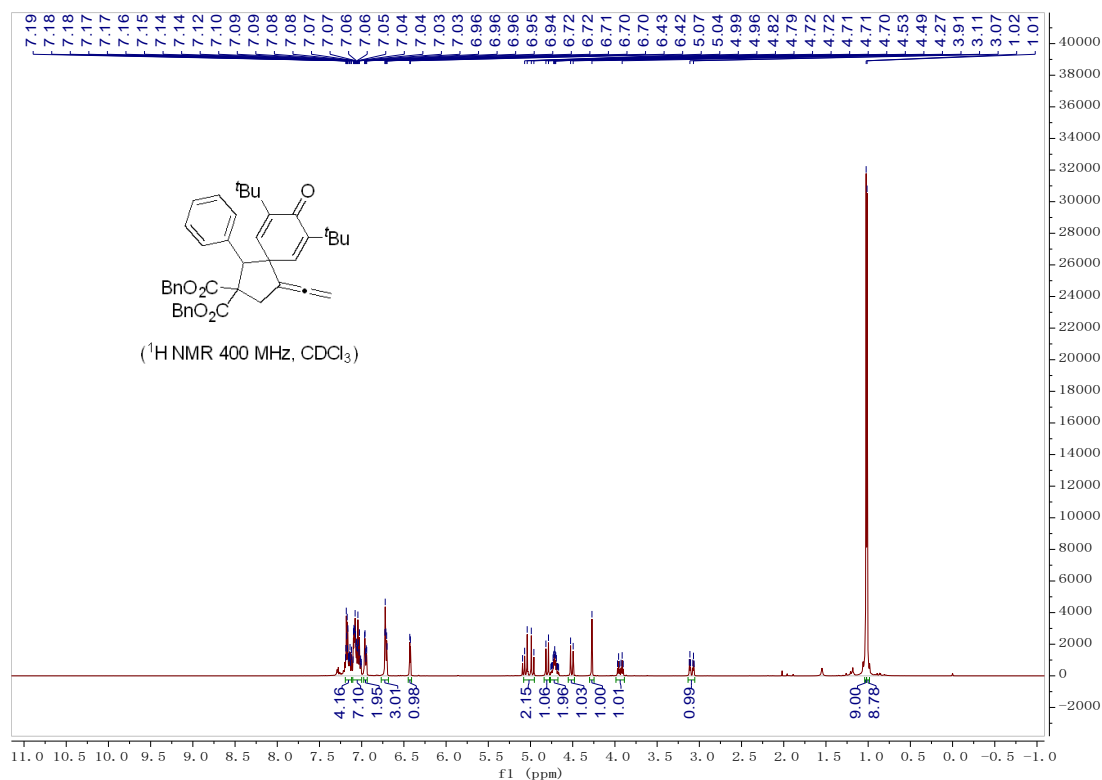

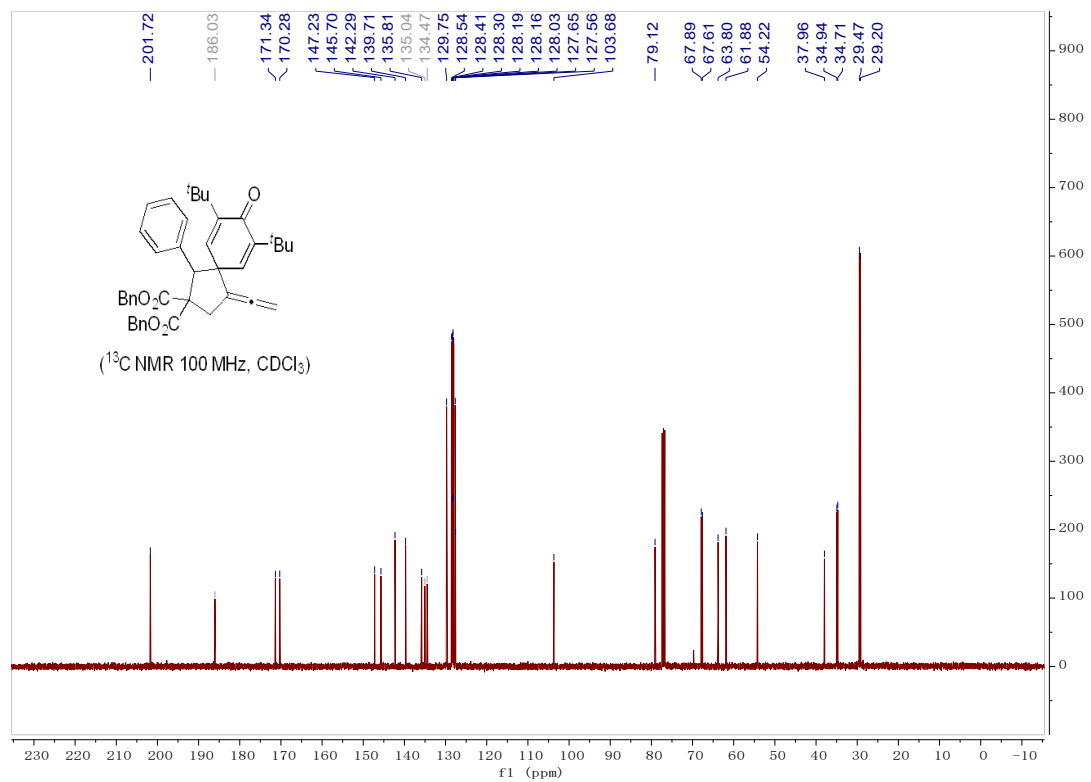



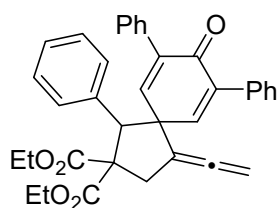

**diethyl 8-oxo-1,7,9-triphenyl-4-vinylidenespiro[4.5]deca-6,9-diene-2,2-dicarboxylate (3y):** Yield: 0.0392 g, 72%, a yellow oil; Eluent: PE/EA = 10/1.  $^1\text{H}$  NMR (400 MHz,  $\text{CDCl}_3$ , TMS)  $\delta$  7.31 – 7.20 (m, 8H), 7.17 – 7.11 (m, 8H), 6.95 (d,  $J = 3.2$  Hz, 1H), 4.88 – 4.79 (m, 2H), 4.53 (s, 1H), 4.25 – 4.11 (m, 2H), 3.98 (dt,  $J = 17.0, 5.2$  Hz, 1H), 3.87 (dq,  $J = 10.8, 7.2$  Hz, 1H), 3.62 (dq,  $J = 10.8, 7.2$  Hz, 1H), 3.15 (dt,  $J = 17.0, 3.2$  Hz, 1H), 1.17 (t,  $J = 7.2$  Hz, 3H), 0.72 (t,  $J = 7.2$  Hz, 3H);  $^{13}\text{C}$   $\{^1\text{H}\}$ -NMR (100 MHz,  $\text{CDCl}_3$ , TMS)  $\delta$  202.2, 183.3, 171.4, 170.0, 147.9, 145.7, 139.3, 138.1, 136.3, 135.97, 135.95, 129.6, 129.1, 128.9, 128.0, 127.85, 127.84, 127.81, 127.7, 103.3, 80.0, 64.2, 62.2, 61.8, 61.7, 55.4, 37.9, 14.0, 13.3; IR (neat):  $\nu$  3055.50, 2979.92, 2927.65, 1962.28, 1723.67, 1659.37, 1495.37, 1259.67, 1206.13, 909.52, 859.10, 696.30  $\text{cm}^{-1}$ ; HRMS (ESI-TOF) Calcd for  $\text{C}_{36}\text{H}_{33}\text{O}_5$   $[\text{M}+\text{H}]^+$  : 545.2323, found: 545.2321.

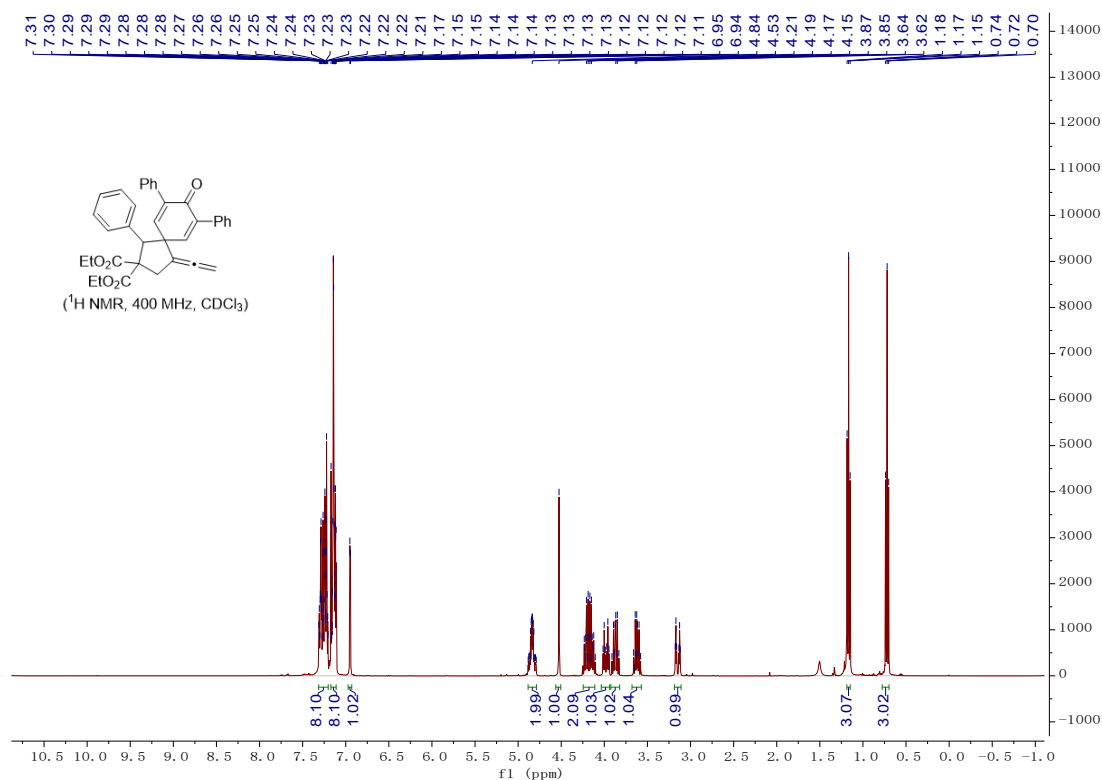

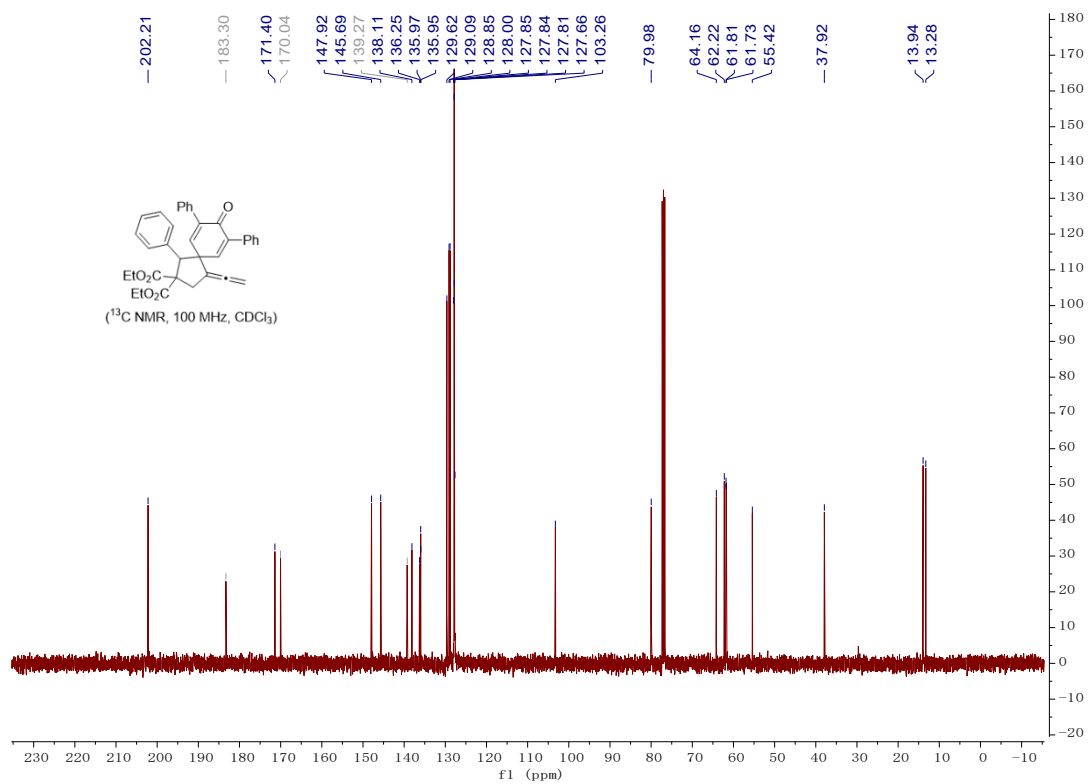

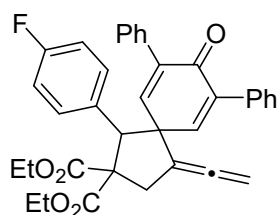

**diethyl 8-oxo-1,7,9-triphenyl-4-vinylidenespiro[4.5]deca-6,9-diene-2,2-dicarboxylate (3z):** Yield: 0.0298 g, 53%, a yellow solid, m.p. 170-172 °C; Eluent: PE/EA = 10/1. <sup>1</sup>H NMR (400 MHz, CDCl<sub>3</sub>, TMS) δ 7.31 – 7.23 (m, 8H), 7.20 – 7.17 (m, 3H), 7.15 – 7.10 (m, 2H), 6.89 (d, *J* = 3.2 Hz, 1H), 6.85 (t, *J* = 8.6 Hz, 2H), 4.91 – 4.80 (m, 2H), 4.51 (s, 1H), 4.24 – 4.12 (m, 2H), 4.01 – 3.89 (m, 2H), 3.64 (dq, *J* = 10.8, 7.2 Hz, 1H), 3.13 (dt, *J* = 17.2, 3.2 Hz, 1H), 1.17 (t, *J* = 7.2 Hz, 3H), 0.79 (t, *J* = 7.2 Hz, 3H); <sup>13</sup>C {<sup>1</sup>H}-NMR (100 MHz, CDCl<sub>3</sub>, TMS) δ 202.2, 183.2, 171.3, 170.2, 162.3 (d, *J* = 246.0 Hz), 147.7, 145.1, 139.8, 138.5, 136.1, 135.8, 131.6 (d, *J* = 3.0 Hz), 131.4 (d, *J* = 7.2 Hz), 129.1, 128.8, 127.98, 127.92, 127.89, 127.8, 114.90 (d, *J* = 21.0 Hz), 103.1, 80.2, 64.0, 62.3, 61.9, 61.1, 55.5, 37.7, 14.0, 13.4; <sup>19</sup>F NMR (376 MHz, CDCl<sub>3</sub>) δ -114.05; IR (neat): ν 2979.84, 2922.52, 1959.72, 1724.65, 1660.08, 1636.14, 1510.18, 1262.18, 1226.07, 1162.33, 1017.79, 697.87 cm<sup>-1</sup>; HRMS (ESI-TOF) Calcd for C<sub>36</sub>H<sub>32</sub>O<sub>5</sub>F [M+H]<sup>+</sup> : 563.2228, found: 563.2227.

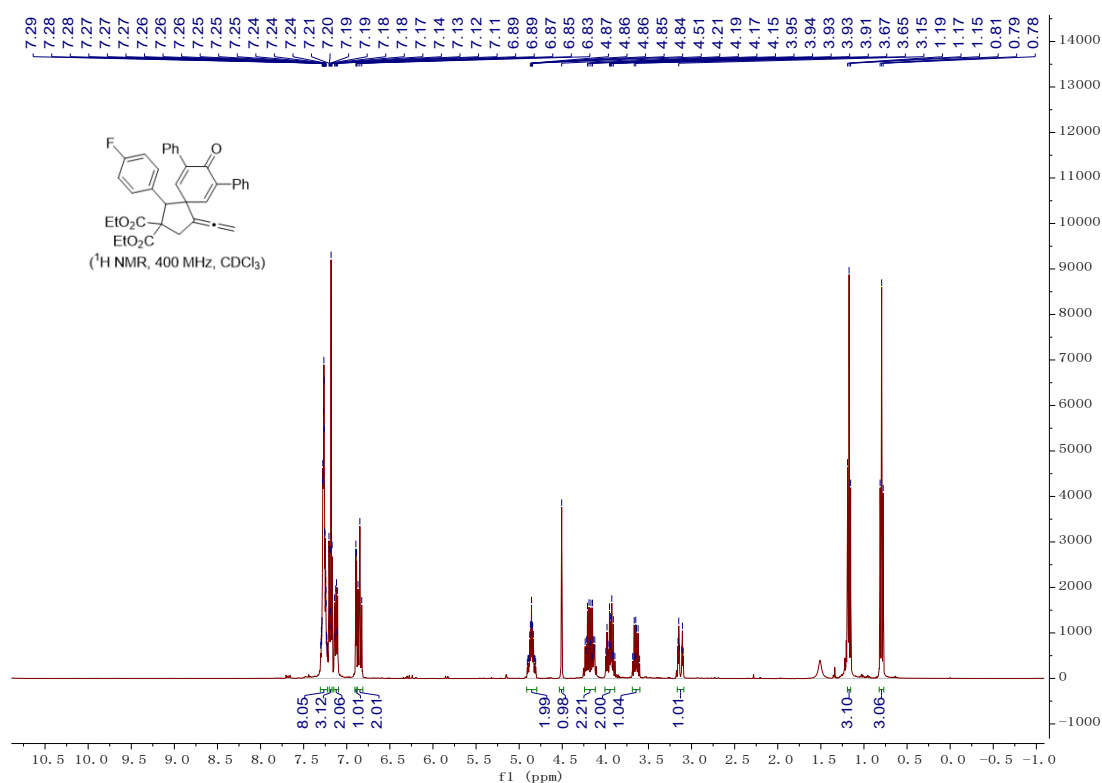

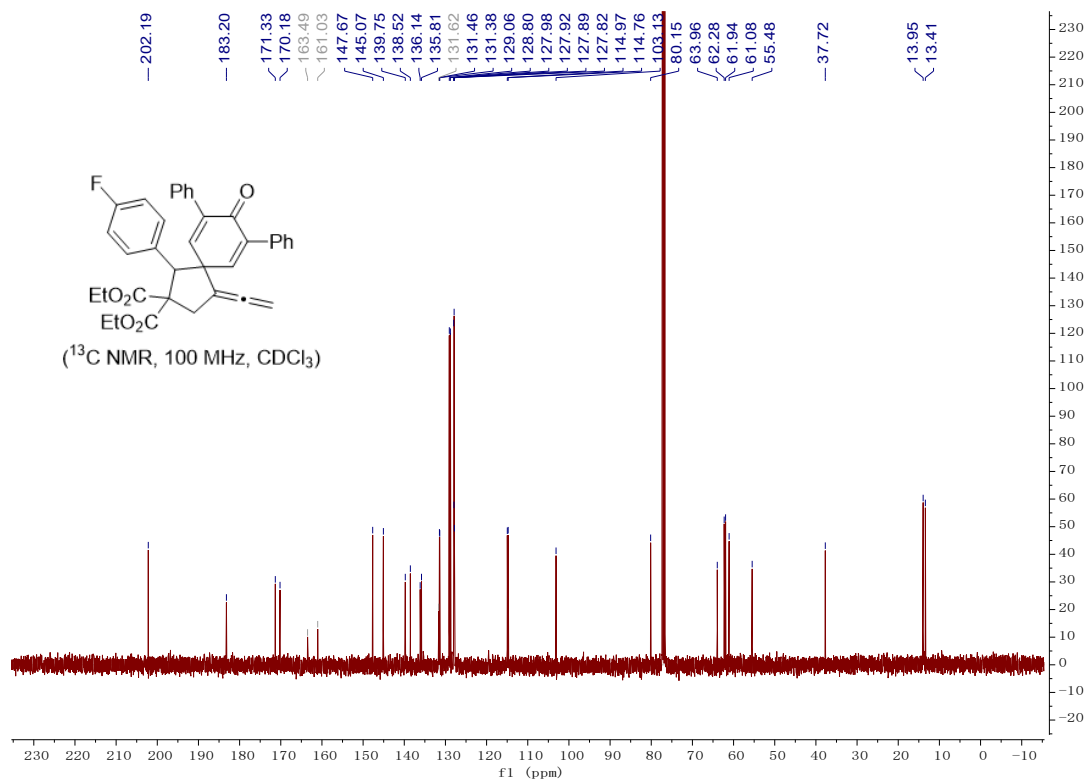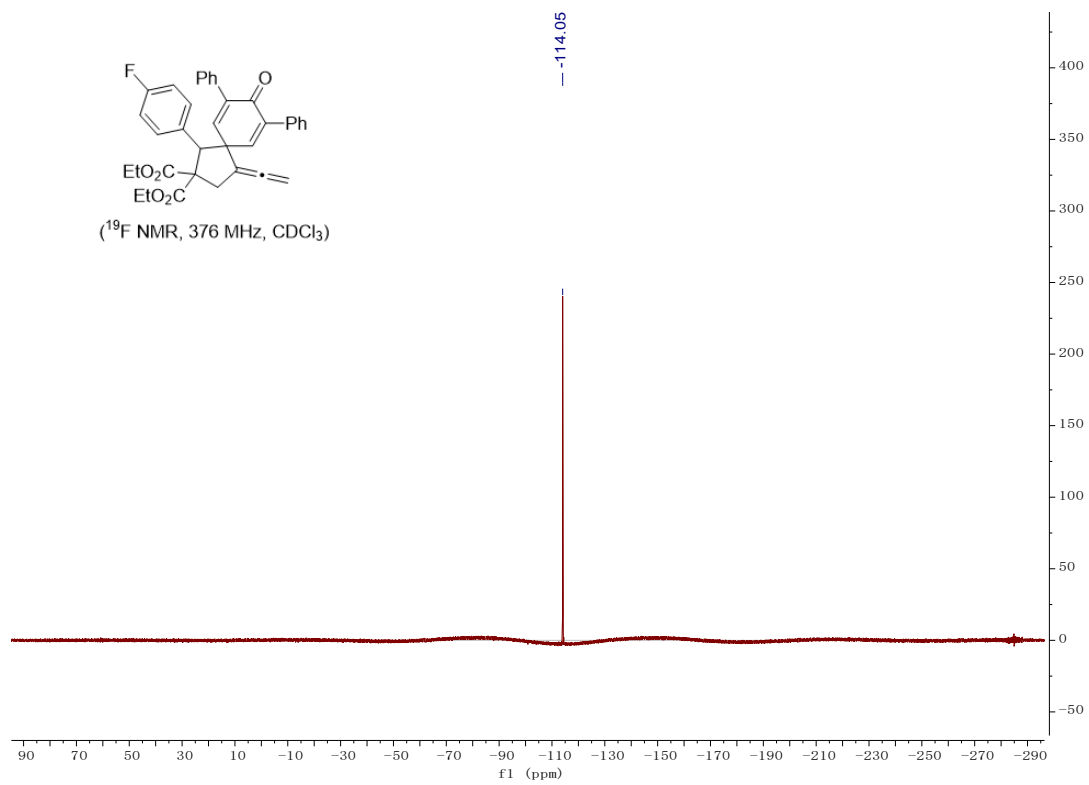

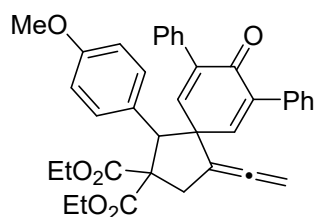

**diethyl 1-(4-methoxyphenyl)-8-oxo-7,9-diphenyl-4-vinylidenespiro[4.5]deca-6,9-diene-2,2-dicarboxylate (3aa):** Yield: 0.0390 g, 68%, a yellow oil; Eluent: PE/EA = 10/1.  $^1\text{H}$  NMR (400 MHz,  $\text{CDCl}_3$ , TMS)  $\delta$  7.31 – 7.22 (m, 8H), 7.21 – 7.18 (m, 3H), 7.08 – 7.03 (m, 2H), 6.91 (d,  $J = 3.2$  Hz, 1H), 6.70 – 6.64 (m, 2H), 4.89 – 4.78 (m, 2H), 4.48 (s, 1H), 4.24 – 4.11 (m, 2H), 4.00 – 3.88 (m, 2H), 3.71 – 3.61 (m, 4H), 3.12 (dt,  $J = 17.0, 3.2$  Hz, 1H), 1.16 (t,  $J = 7.2$  Hz, 3H), 0.79 (t,  $J = 7.2$  Hz, 3H);  $^{13}\text{C}\{^1\text{H}\}$ -NMR (100 MHz,  $\text{CDCl}_3$ , TMS)  $\delta$  202.2, 183.4, 171.5, 170.4, 159.1, 148.2, 145.7, 139.5, 138.3, 136.4, 136.0, 130.9, 129.1, 128.9, 127.9, 128.0, 127.9, 127.8, 127.7, 113.3, 103.3, 80.0, 64.1, 62.2, 61.9, 61.3, 55.7, 55.2, 37.8, 14.0, 13.5; IR (neat):  $\nu$  3058.11, 2982.53, 2927.65, 2831.12, 1957.06, 1722.81, 1659.26, 1637.71, 1514.10, 1251.85, 1206.41, 1180.90, 727.44, 696.72  $\text{cm}^{-1}$ ; HRMS (ESI-TOF) Calcd for  $\text{C}_{37}\text{H}_{35}\text{O}_6$   $[\text{M}+\text{H}]^+$  : 575.2428, found: 575.2424.

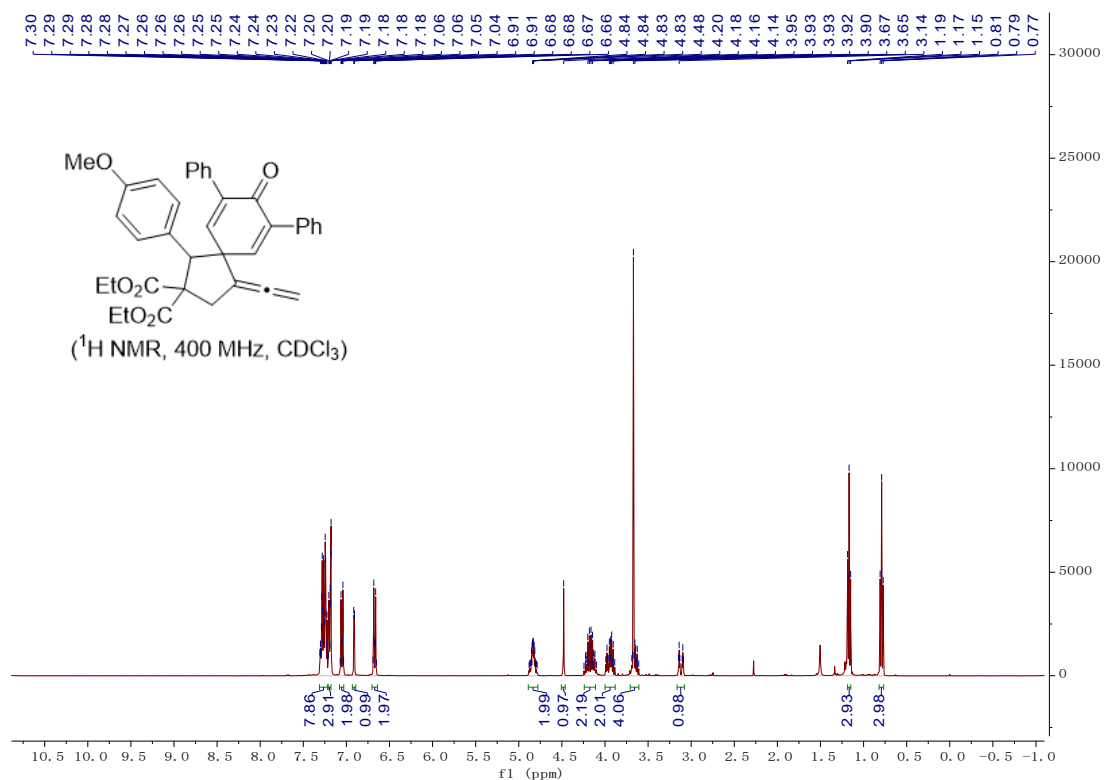

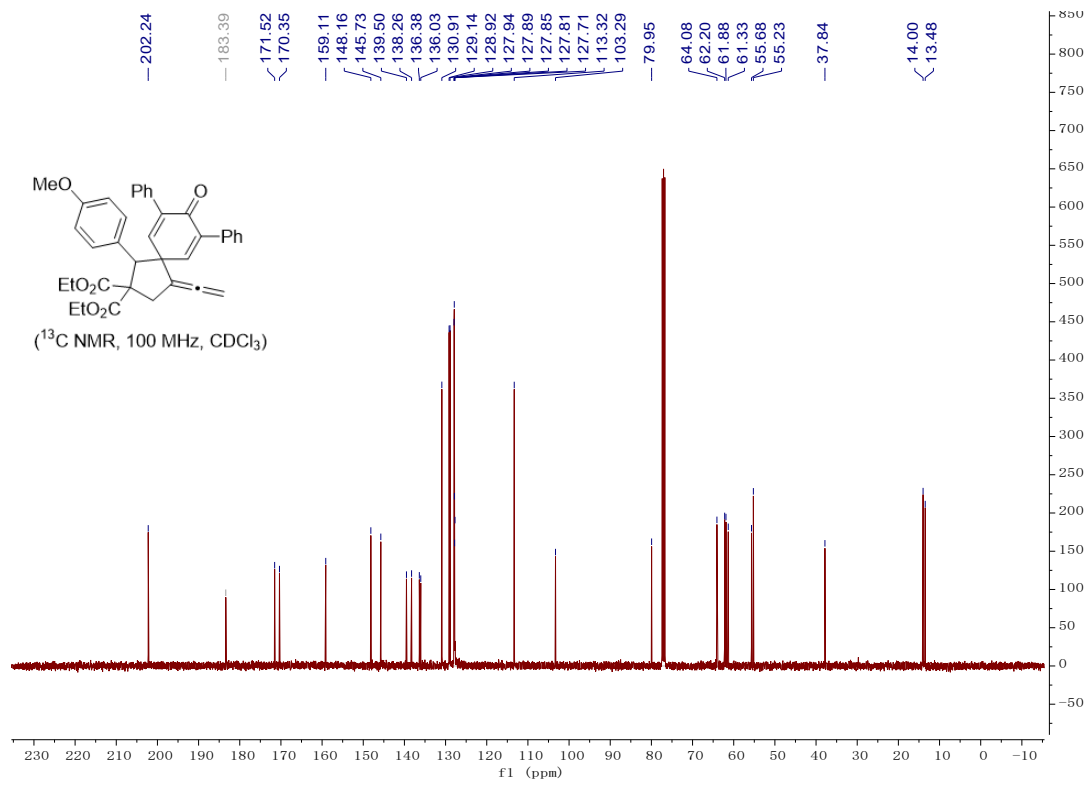

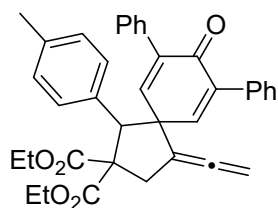

**diethyl 8-oxo-7,9-diphenyl-1-(p-tolyl)-4-vinylidenespiro[4.5]deca-6,9-diene-2,2-dicarboxylate (3ab):** Yield: 0.0262 g, 47%, a yellow solid, m.p. 126-128 °C; Eluent: PE/EA = 10/1. <sup>1</sup>H NMR (400 MHz, CDCl<sub>3</sub>, TMS) δ 7.32 – 7.21 (m, 8H), 7.18 – 7.14 (m, 3H), 7.03 – 6.99 (m, 2H), 6.97 – 6.91 (m, 3H), 4.88 – 4.78 (m, 2H), 4.49 (s, 1H), 4.24 – 4.10 (m, 2H), 4.00 – 3.87 (m, 2H), 3.64 (dq, *J* = 10.8, 7.2 Hz, 1H), 3.13 (dt, *J* = 17.0, 3.2 Hz, 1H), 2.20 (s, 3H), 1.17 (t, *J* = 7.2 Hz, 3H), 0.77 (t, *J* = 7.2 Hz, 3H); <sup>13</sup>C {<sup>1</sup>H}-NMR (100 MHz, CDCl<sub>3</sub>, TMS) δ 202.3, 183.4, 171.5, 170.3, 148.2, 145.8, 139.4, 138.1, 137.5, 136.4, 136.0, 132.7, 129.6, 129.2, 128.9, 128.7, 127.9, 127.9, 127.8, 127.7, 103.3, 79.9, 64.1, 62.2, 61.9, 61.6, 55.6, 38.0, 21.0, 14.0, 13.4; IR (neat): ν 3058.11, 2979.92, 2919.83, 1962.28, 1723.08, 1659.52, 1638.16, 1455.28, 1364.21, 1259.00, 1219.79, 793.40, 697.14 cm<sup>-1</sup>; HRMS (ESI-TOF) Calcd for C<sub>37</sub>H<sub>35</sub>O<sub>5</sub> [M+H]<sup>+</sup> : 559.2479, found: 559.2478.

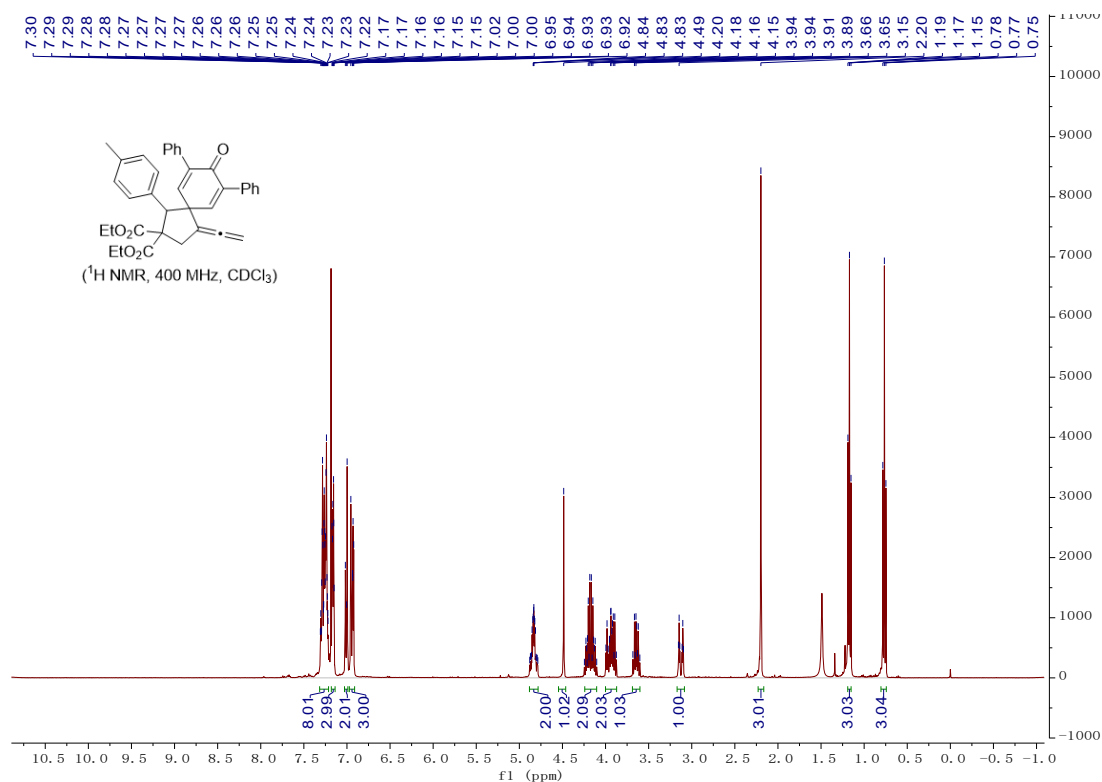

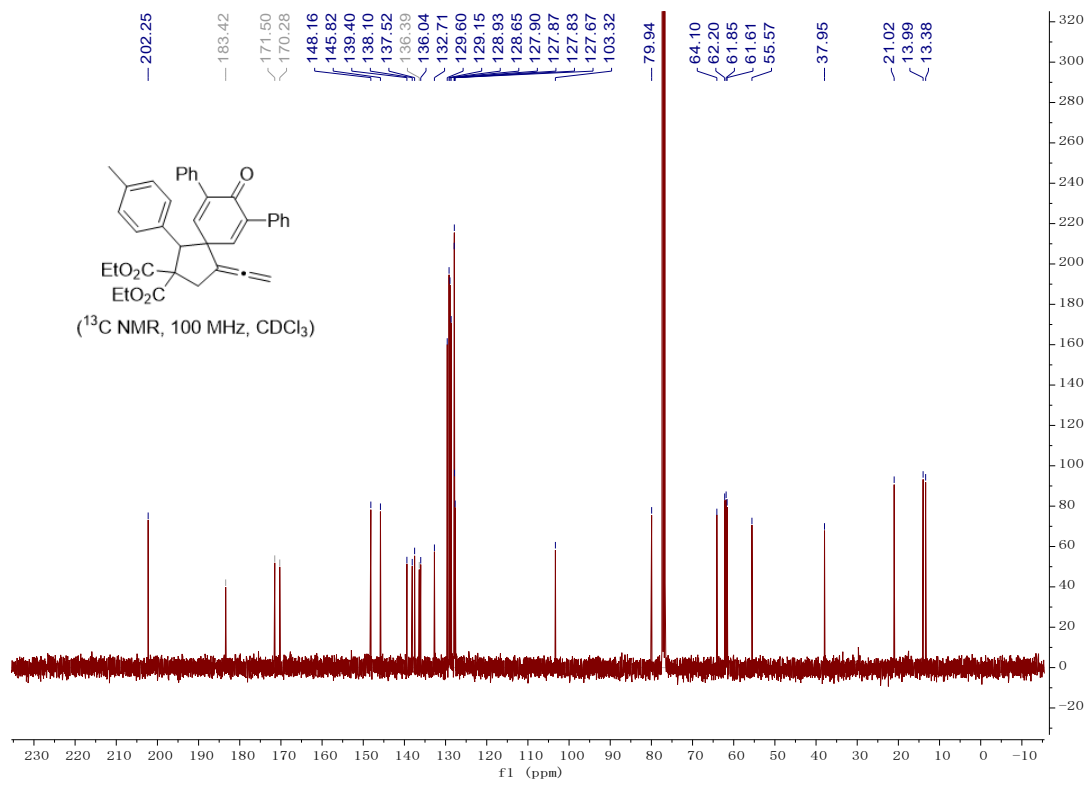



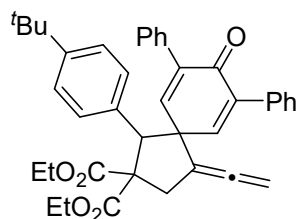

**diethyl 1-(4-(*tert*-butyl)phenyl)-8-oxo-7,9-diphenyl-4-vinylidenespiro[4.5]deca-6,9-diene-2,2-dicarboxylate (3ac):** Yield: 0.0390 g, 65%, a yellow oil; Eluent: PE/EA = 10/1.  $^1\text{H}$  NMR (400 MHz,  $\text{CDCl}_3$ , TMS)  $\delta$  7.35 – 7.17 (m, 10H), 7.08 – 7.03 (m, 5H), 7.00 (d,  $J = 3.2$  Hz, 1H), 4.89 – 4.77 (m, 2H), 4.52 (s, 1H), 4.25 – 4.12 (m, 2H), 3.97 (dt,  $J = 17.0, 5.2$  Hz, 1H), 3.84 – 3.75 (m, 1H), 3.72 – 3.62 (m, 1H), 3.15 (dt,  $J = 17.0, 3.0$  Hz, 1H), 1.21 – 1.16 (m, 12H), 0.64 (t,  $J = 7.2$  Hz, 3H);  $^{13}\text{C}\{^1\text{H}\}$ -NMR (100 MHz,  $\text{CDCl}_3$ , TMS)  $\delta$  202.3, 183.4, 171.5, 169.8, 150.7, 148.2, 146.4, 138.9, 137.7, 136.3, 136.1, 133.3, 129.2, 129.1, 128.9, 127.9, 127.8, 127.6, 125.0, 103.3, 79.9, 64.5, 62.2, 61.7, 61.1, 55.2, 38.1, 34.5, 31.2, 14.0, 13.1; IR (neat):  $\nu$  3058.11, 2979.92, 2919.83, 1962.28, 1723.08, 1659.52, 1638.16, 1455.28, 1364.21, 1259.00, 1219.79, 793.40, 697.14  $\text{cm}^{-1}$ ; HRMS (ESI-TOF) Calcd for  $\text{C}_{40}\text{H}_{41}\text{O}_5$   $[\text{M}+\text{H}]^+$  : 601.2949, found: 601.2947.

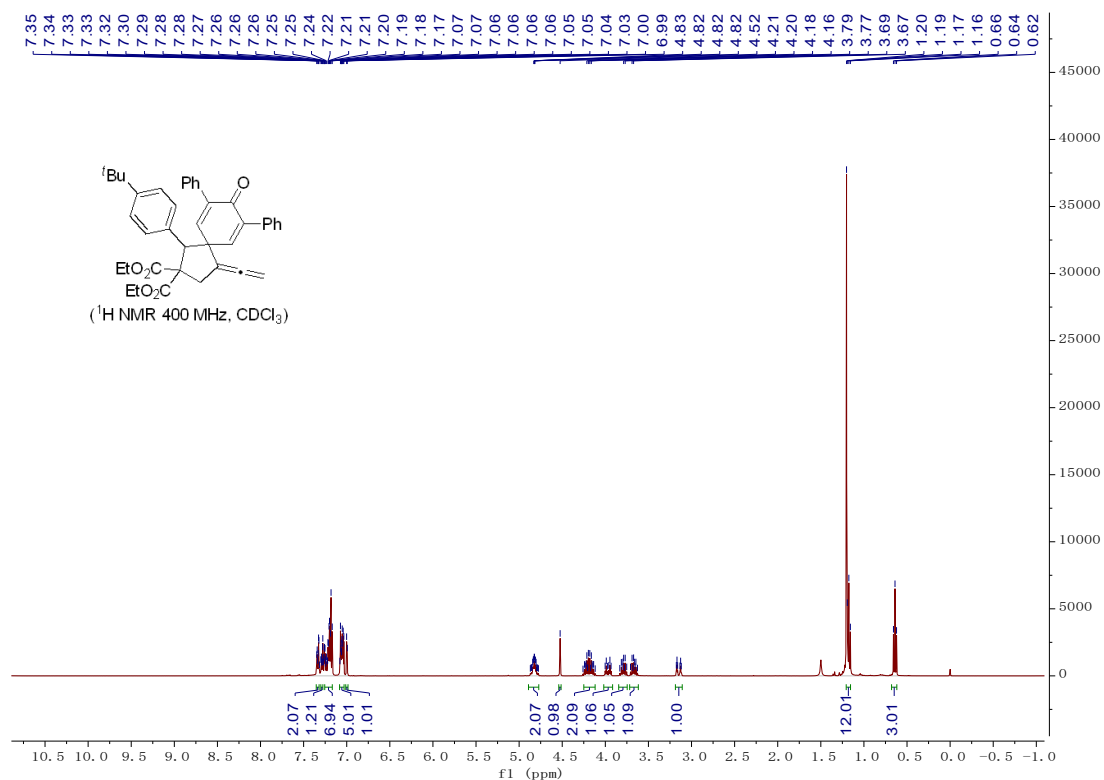

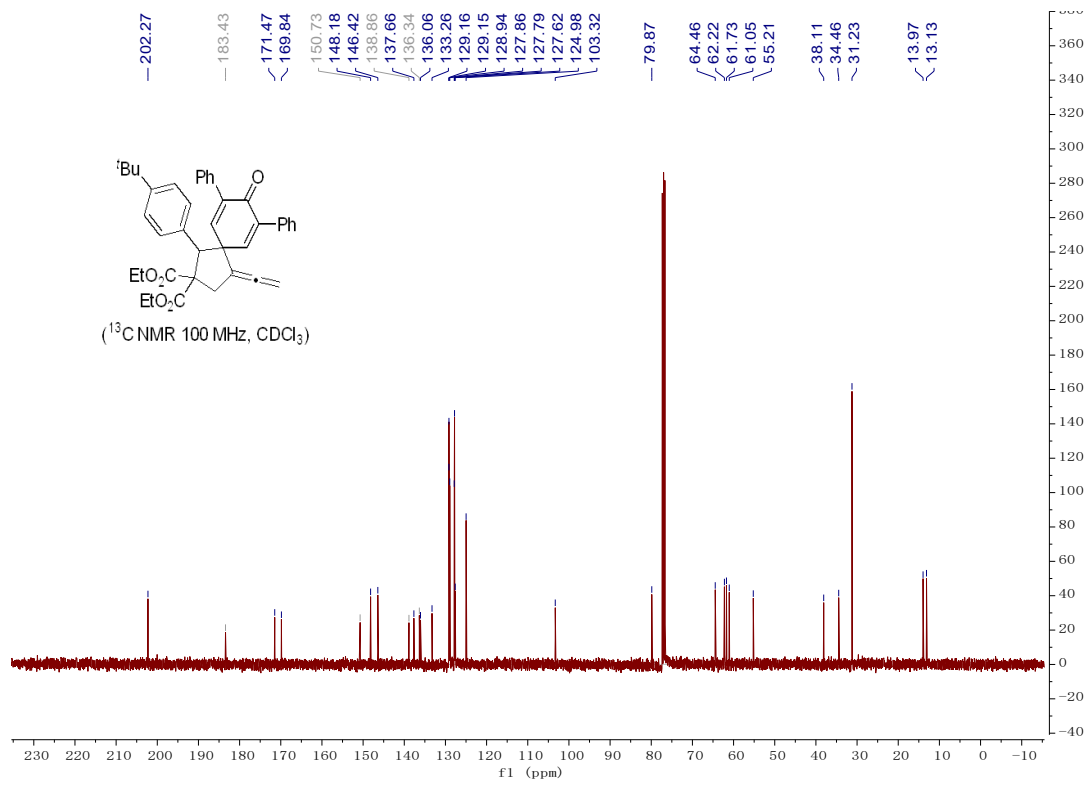

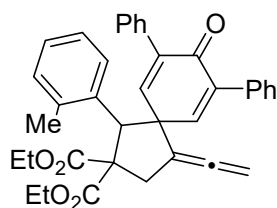

**diethyl 8-oxo-7,9-diphenyl-1-(o-tolyl)-4-vinylidenespiro[4.5]deca-6,9-diene-2,2-dicarboxylate (3ad):** Yield: 0.0390 g, 76%, a yellow solid, m.p. 147-149 °C; Eluent: PE/EA = 10/1.  $^1\text{H}$  NMR (400 MHz,  $\text{CDCl}_3$ , TMS)  $\delta$  7.39 – 7.23 (m, 5H), 7.18 – 7.14 (m, 3H), 7.13 – 7.01 (m, 5H), 6.96 – 6.90 (m, 2H), 6.75 (d,  $J = 3.2$  Hz, 1H), 5.00 (s, 1H), 4.82 (dd,  $J = 5.0, 3.2$  Hz, 2H), 4.28 – 4.14 (m, 2H), 4.00 (dt,  $J = 17.2, 5.0$  Hz, 1H), 3.77 (dq,  $J = 10.8, 7.2$  Hz, 1H), 3.62 (dq,  $J = 10.8, 7.2$  Hz, 1H), 3.31 – 3.20 (m, 1H), 2.29 (s, 3H), 1.18 (t,  $J = 7.2$  Hz, 3H), 0.67 (t,  $J = 7.2$  Hz, 3H);  $^{13}\text{C}\{^1\text{H}\}$ -NMR (100 MHz,  $\text{CDCl}_3$ , TMS)  $\delta$  202.6, 183.3, 171.7, 169.3, 148.1, 146.7, 137.8, 137.6, 137.4, 136.2, 136.1, 135.6, 130.9, 129.1, 128.9, 128.02, 127.98, 127.83, 127.79, 127.7, 127.5, 125.5, 103.4, 79.9, 65.3, 62.5, 61.8, 55.1, 55.0, 38.2, 20.8, 14.0, 13.3; IR (neat):  $\nu$  3024.19, 2979.84, 2930.34, 1959.67, 1728.21, 1659.42, 1638.38, 1493.91, 1445.36, 1367.43, 1256.40, 1118.03, 861.45, 697.28  $\text{cm}^{-1}$ ; HRMS (ESI-TOF) Calcd for  $\text{C}_{37}\text{H}_{35}\text{O}_5$   $[\text{M}+\text{H}]^+$  : 559.2479, found: 559.2477.

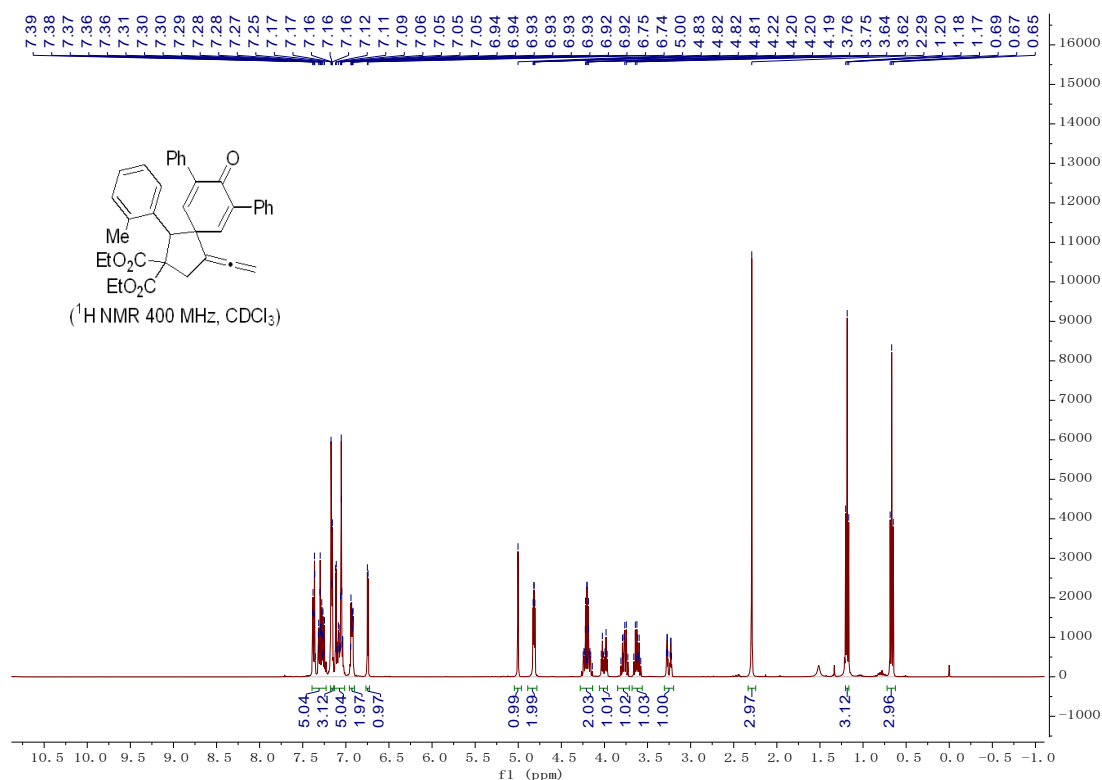

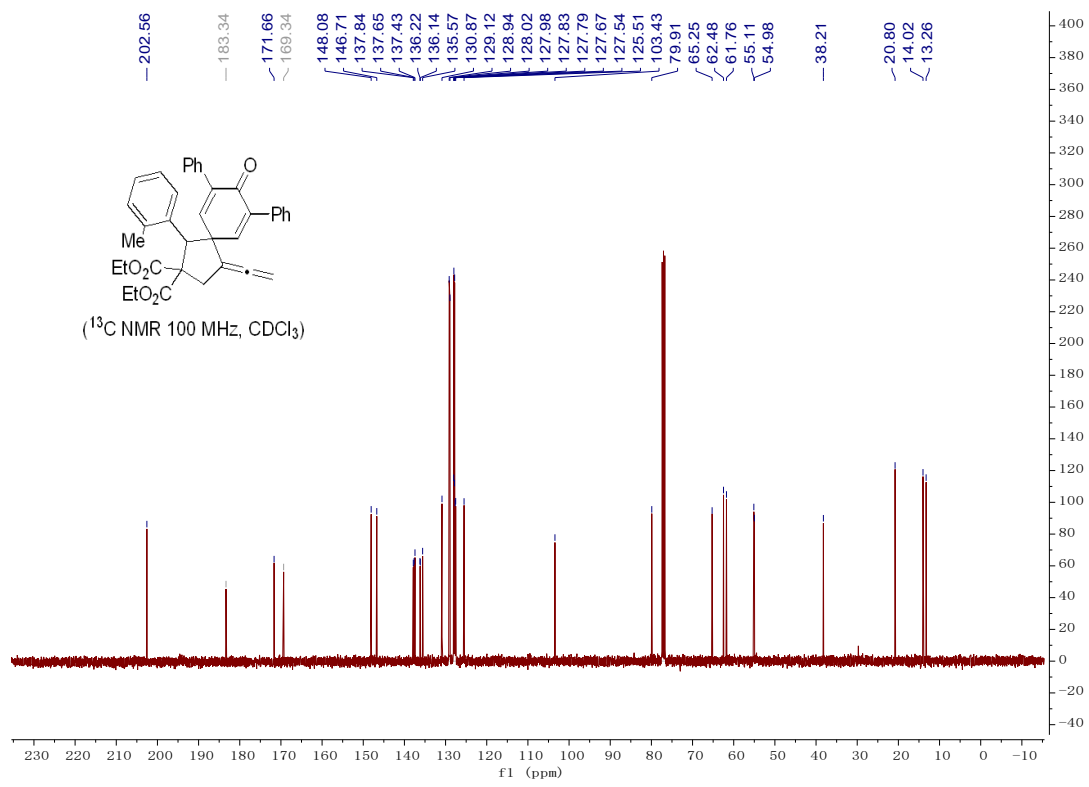

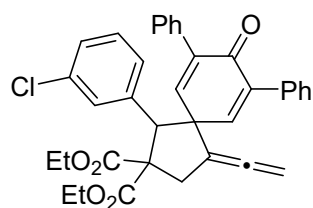

**diethyl 1-(3-chlorophenyl)-8-oxo-7,9-diphenyl-4-vinylidenespiro[4.5]deca-6,9-diene-2,2-dicarboxylate (3ae):** Yield: 0.0393 g, 68%, a yellow solid, m.p. 143-145 °C; Eluent: PE/EA = 10/1.  $^1\text{H}$  NMR (400 MHz,  $\text{CDCl}_3$ , TMS)  $\delta$  7.28 – 7.04 (m, 15H), 6.88 (d,  $J = 3.2$  Hz, 1H), 4.96 – 4.78 (m, 2H), 4.47 (s, 1H), 4.27 – 4.09 (m, 2H), 4.02 – 3.88 (m, 2H), 3.71 (dq,  $J = 10.8, 7.2$  Hz, 1H), 3.12 (dt,  $J = 17.0, 3.2$  Hz, 1H), 1.18 (d,  $J = 7.2$  Hz, 3H), 0.81 (t,  $J = 7.2$  Hz, 3H);  $^{13}\text{C}\{^1\text{H}\}$ -NMR (100 MHz,  $\text{CDCl}_3$ , TMS)  $\delta$  202.2, 183.2, 171.2, 170.2, 147.5, 144.8, 140.0, 138.8, 137.8, 136.2, 135.8, 133.8, 129.9, 129.3, 129.1, 128.9, 128.2, 128.1, 128.01, 128.00, 127.93, 127.87, 103.1, 80.3, 63.8, 62.4, 62.1, 61.4, 55.5, 37.8, 14.0, 13.4; IR (neat):  $\nu$  3052.89, 2982.53, 2927.65, 1957.11, 1723.45, 1659.96, 1638.91, 1568.34, 1262.24, 1219.53, 1113.19, 1012.57, 858.78, 696.57  $\text{cm}^{-1}$ ; HRMS (ESI-TOF) Calcd for  $\text{C}_{36}\text{H}_{32}\text{ClO}_5$   $[\text{M}+\text{H}]^+$  : 579.1933, found: 579.1930.

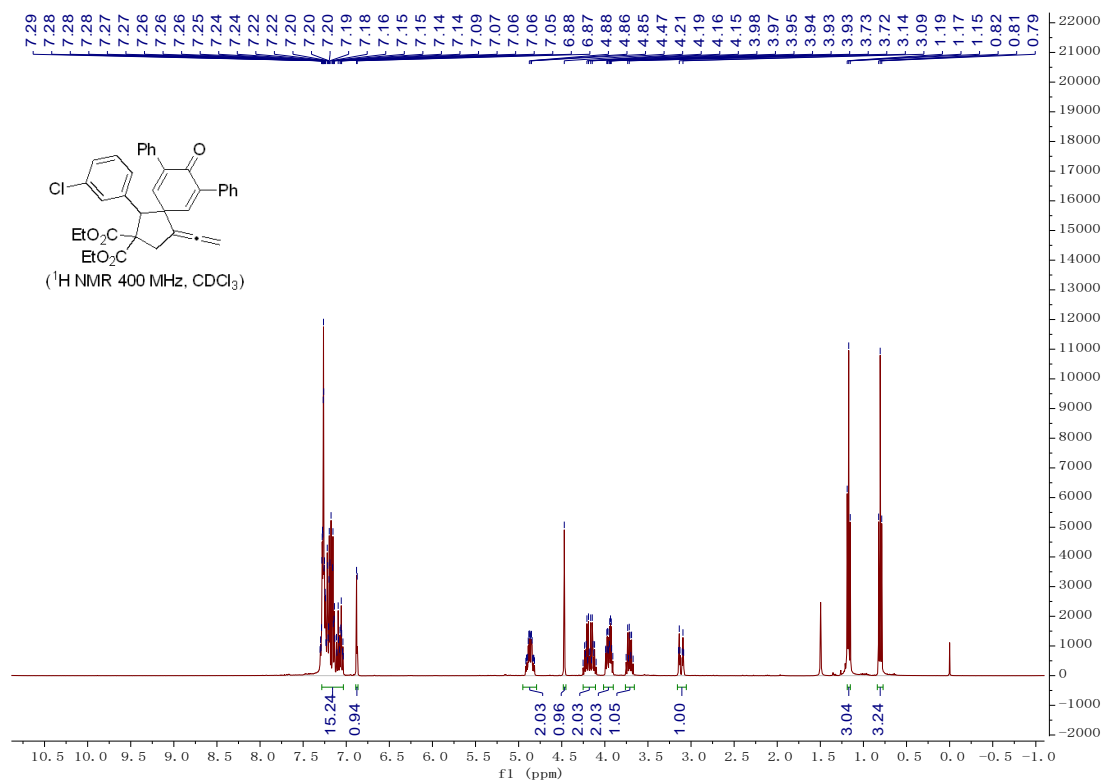

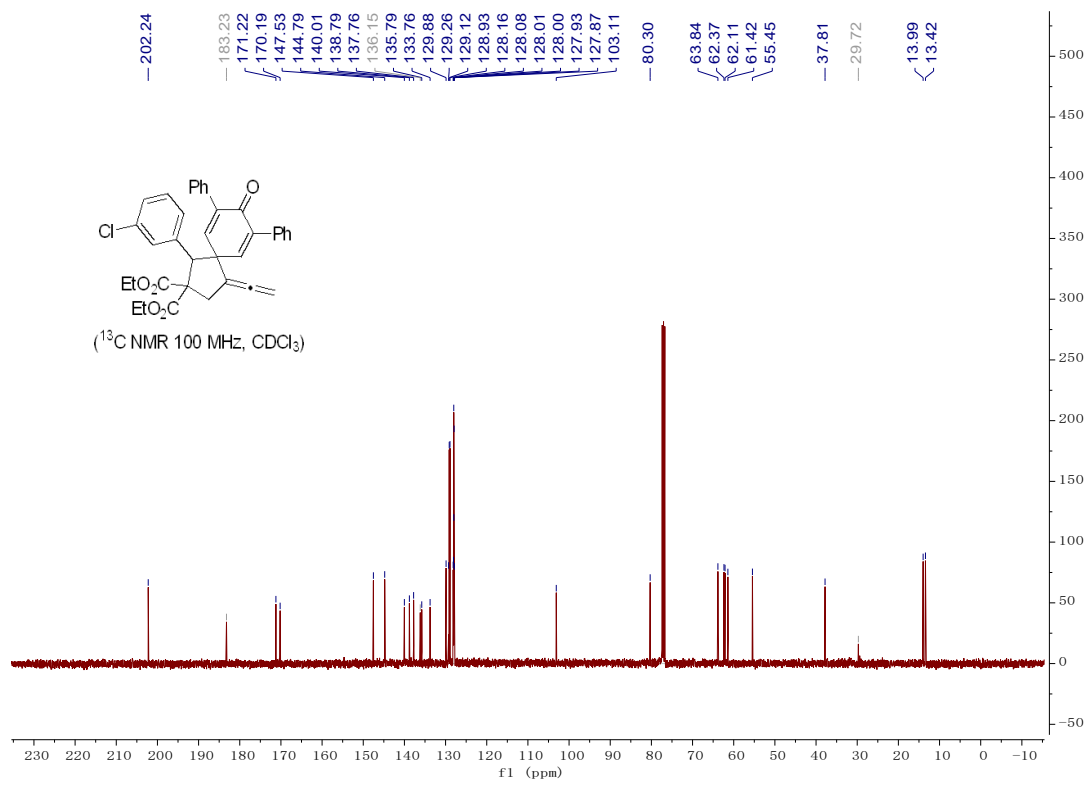

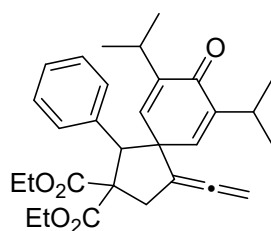

**diethyl 7,9-diisopropyl-8-oxo-1-phenyl-4-vinylidenespiro[4.5]deca-6,9-diene-2,2-dicarboxylate (3af):** Yield: 0.0190 g, 40%, a colorless oil; Eluent: PE/EA = 30/1.  $^1\text{H}$  NMR (400 MHz,  $\text{CDCl}_3$ , TMS)  $\delta$  7.17 – 7.12 (m, 3H), 7.10 – 7.04 (m, 2H), 6.82 (d,  $J = 3.0$  Hz, 1H), 6.51 (d,  $J = 3.0$  Hz, 1H), 4.86 – 4.73 (m, 2H), 4.37 (s, 1H), 4.30 – 4.18 (m, 2H), 4.05 – 3.93 (m, 2H), 3.71 (dq,  $J = 10.6, 7.2$  Hz, 1H), 3.14 (dt,  $J = 17.0, 3.2$  Hz, 1H), 2.94 – 2.82 (m, 2H), 1.25 (t,  $J = 7.2$  Hz, 3H), 0.99 (d,  $J = 6.8$  Hz, 6H), 0.92 (d,  $J = 6.8$  Hz, 3H), 0.87 (d,  $J = 6.8$  Hz, 3H), 0.81 (t,  $J = 7.2$  Hz, 3H);  $^{13}\text{C}\{^1\text{H}\}$ -NMR (100 MHz,  $\text{CDCl}_3$ , TMS)  $\delta$  201.6, 185.0, 171.6, 170.5, 145.2, 143.3, 142.8, 140.4, 136.1, 129.7, 127.54, 127.46, 103.4, 79.1, 63.9, 62.1, 61.7, 61.5, 54.2, 37.8, 26.5, 26.1, 22.2, 22.0, 21.9, 21.3, 14.0, 13.3; IR (neat):  $\nu$  2959.53, 2925.04, 2867.64, 1959.72, 11725.28, 1636.06, 1463.07, 1253.83, 1204.04, 1090.85, 1009.96, 754.26, 700.72  $\text{cm}^{-1}$ ; HRMS (DART) Calcd for  $\text{C}_{30}\text{H}_{37}\text{O}_5$   $[\text{M}+\text{H}]^+$  : 477.2636, found: 477.2628.

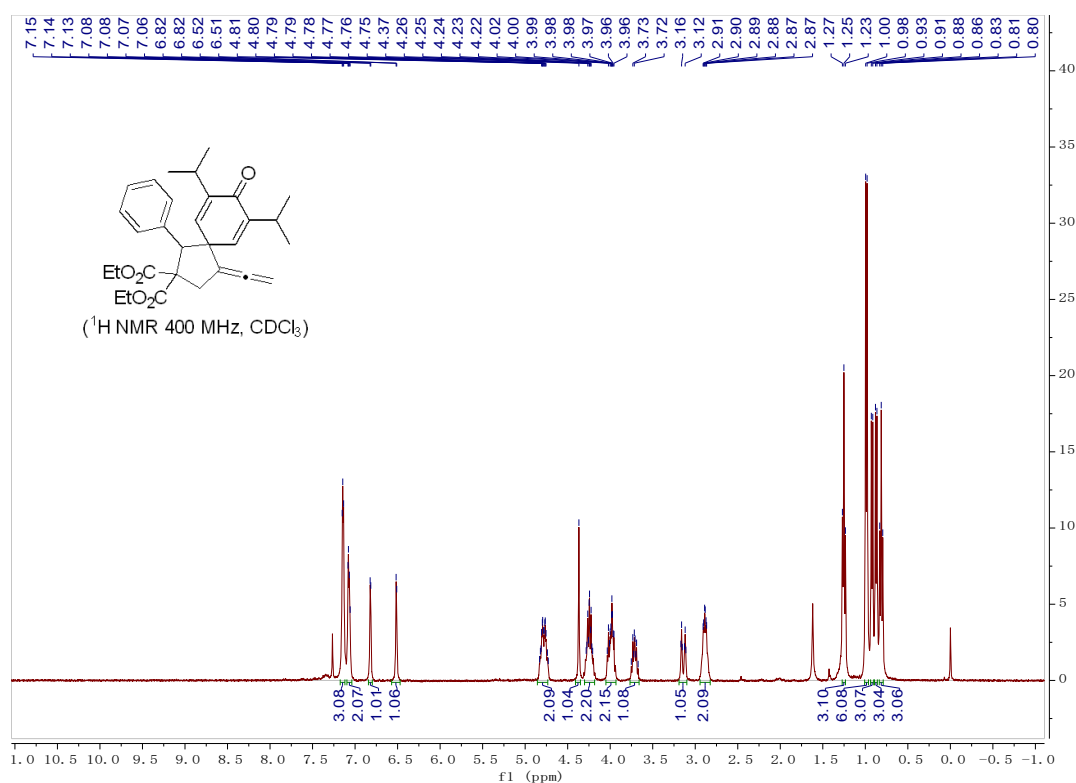

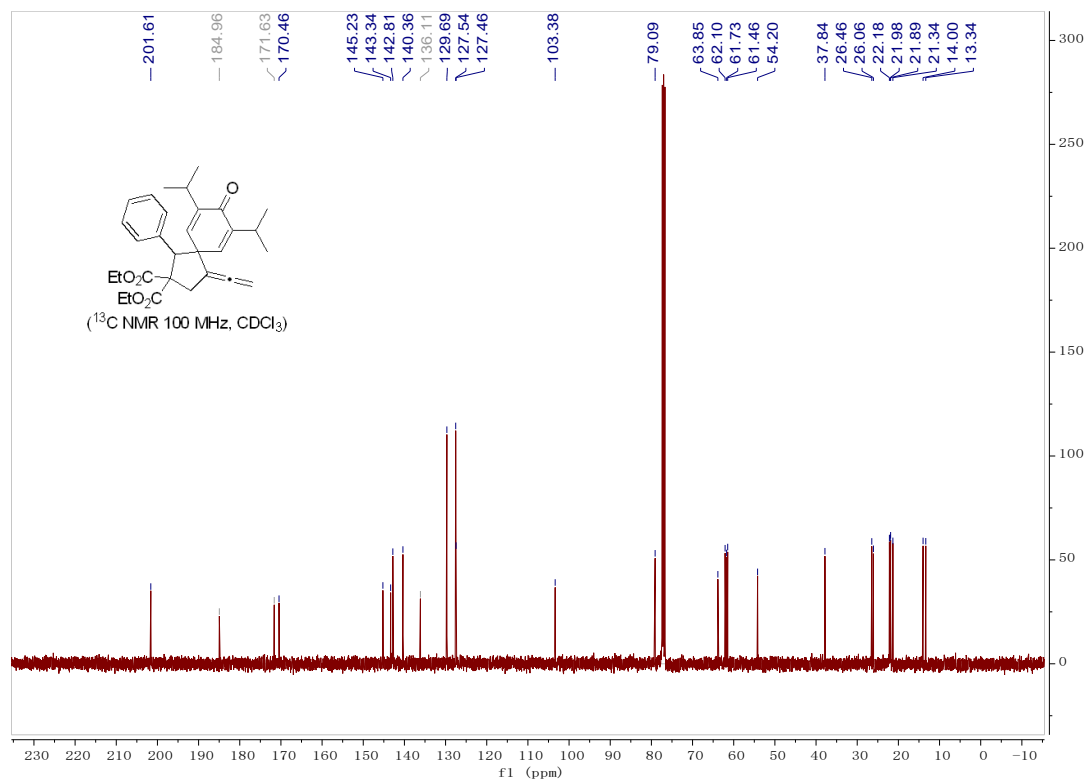



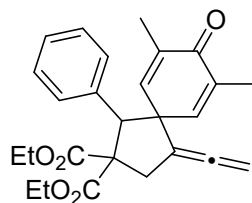

**diethyl 7,9-dimethyl-8-oxo-1-phenyl-4-vinylidenespiro[4.5]deca-6,9-diene-2,2-dicarboxylate (3ag):** Yield: 0.0096 g, 23%, a colorless oil; Eluent: PE/EA = 30/1.  $^1\text{H}$  NMR (400 MHz,  $\text{CDCl}_3$ , TMS)  $\delta$  7.13 – 7.07 (m, 3H), 7.07 – 7.01 (m, 2H), 6.95 – 6.92 (m, 1H), 6.56 – 6.51 (m, 1H), 4.80 – 4.69 (m, 2H), 4.32 (s, 1H), 4.25 – 4.09 (m, 2H), 3.96 – 3.85 (m, 2H), 3.57 (dq,  $J = 10.8, 7.2$  Hz, 1H), 3.01 (dt,  $J = 17.0, 3.2$  Hz, 1H), 1.75 (s, 3H), 1.72 (s, 3H), 1.16 (t,  $J = 7.2$  Hz, 3H), 0.72 (t,  $J = 7.2$  Hz, 3H);  $^{13}\text{C}\{^1\text{H}\}$ -NMR (100 MHz,  $\text{CDCl}_3$ , TMS)  $\delta$  201.4, 187.1, 171.6, 170.5, 146.3, 143.8, 136.0, 135.3, 133.8, 129.6, 127.7, 127.6, 103.3, 79.5, 63.9, 62.1, 61.7, 61.2, 55.2, 37.7, 16.2, 16.0, 14.0, 13.3; IR (neat):  $\nu$  2961.57, 2923.21, 2846.77, 1962.28, 1723.49, 1668.21, 1637.59, 1453.53, 1370.04, 1252.80, 1204.80, 1113.31, 1034.36, 939.52, 700.55  $\text{cm}^{-1}$ ; HRMS (ESI-TOF) Calcd for  $\text{C}_{26}\text{H}_{29}\text{O}_5$   $[\text{M}+\text{H}]^+$  : 421.2010, found: 421.2008.

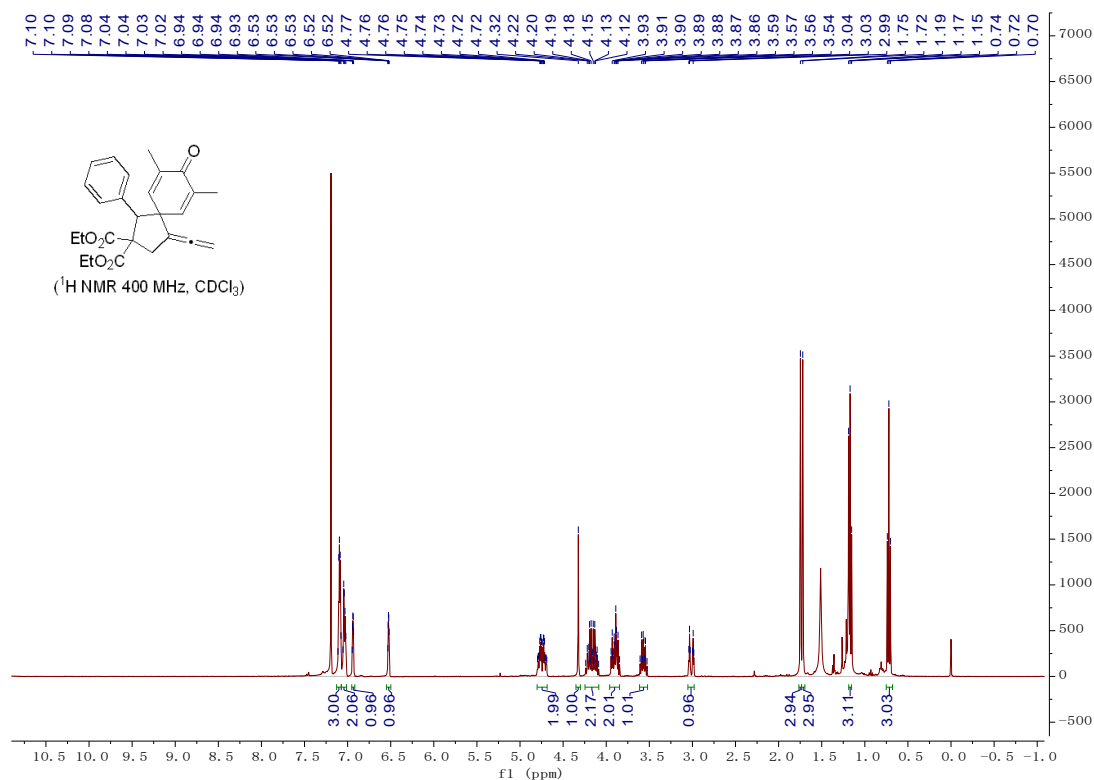

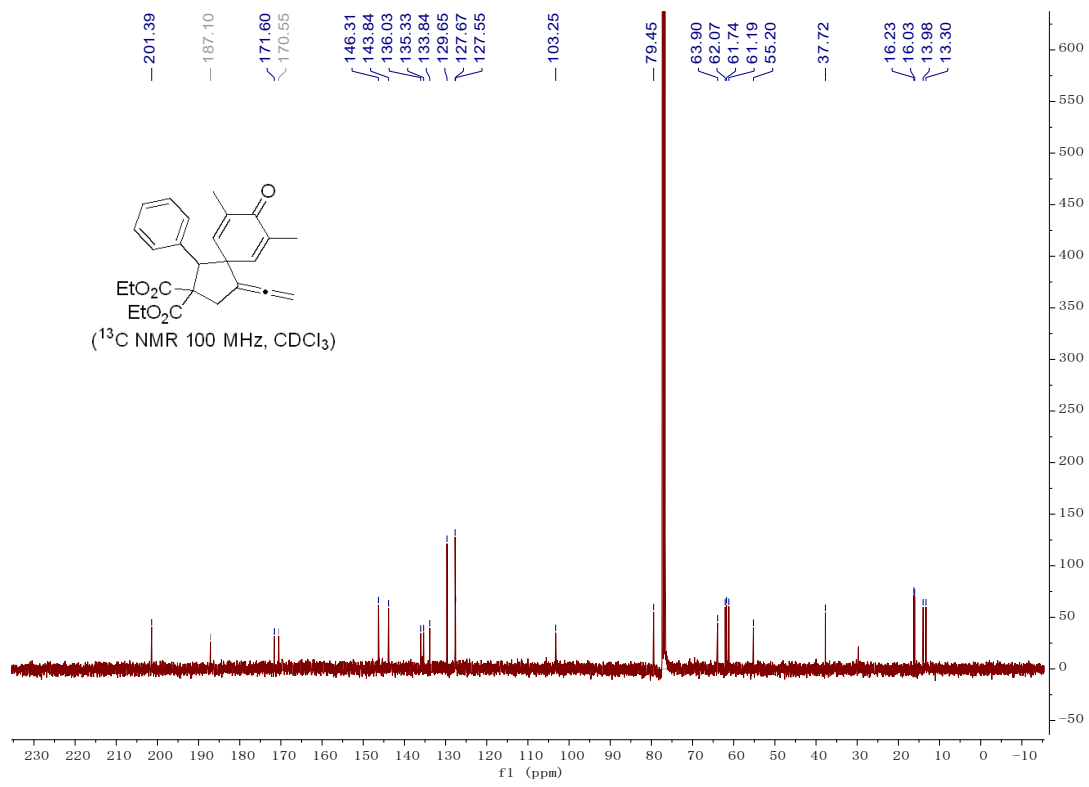

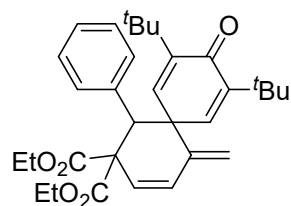

**diethyl 8,10-di-*tert*-butyl-5-methylene-9-oxo-1-phenylspiro[5.5]undeca-3,7,10-triene-2,2-dicarboxylate (4a):** Yield: 74%, a pale yellow solid, m.p. 117-119 °C; Eluent: PE/EA = 30/1. Yield was determined by  $^1\text{H}$  NMR using dibromomethane as an internal standard.  $^1\text{H}$  NMR (400 MHz,  $\text{CDCl}_3$ , TMS)  $\delta$  7.22 – 7.06 (m, 5H), 6.61 (d,  $J = 10.2$  Hz, 1H), 6.46 (d,  $J = 10.2$  Hz, 1H), 6.40 (d,  $J = 3.2$  Hz, 1H), 5.92 (d,  $J = 3.2$  Hz, 1H), 5.11 (s, 1H), 4.89 (s, 1H), 4.32 – 4.20 (m, 2H), 3.92 (s, 1H), 3.74 – 3.66 (m, 1H), 3.60 – 3.52 (m, 1H), 1.27 (t,  $J = 7.2$  Hz, 3H), 1.17 (s, 9H), 1.07 (s, 9H), 0.77 (t,  $J = 7.2$  Hz, 3H);  $^{13}\text{C}\{^1\text{H}\}$ -NMR (100 MHz,  $\text{CDCl}_3$ , TMS) 186.0, 168.4, 168.3, 147.1, 144.3, 143.9, 143.1, 141.1, 138.6, 130.2, 127.8, 127.5, 125.9, 117.2, 62.4, 61.8, 59.2, 53.9, 46.7, 35.0, 34.6, 29.3, 29.0, 14.0, 13.3; IR (neat):  $\nu$  2995.58, 2957.60, 2906.86, 2865.11, 1736.30, 1715.05, 1658.45, 1388.35, 1232.46, 1182.75, 1117.73, 1061.27, 714.94  $\text{cm}^{-1}$ ; HRMS (DART) Calcd for  $\text{C}_{32}\text{H}_{41}\text{O}_5$   $[\text{M}+\text{H}]^+$  : 505.2949, found: 505.2946.

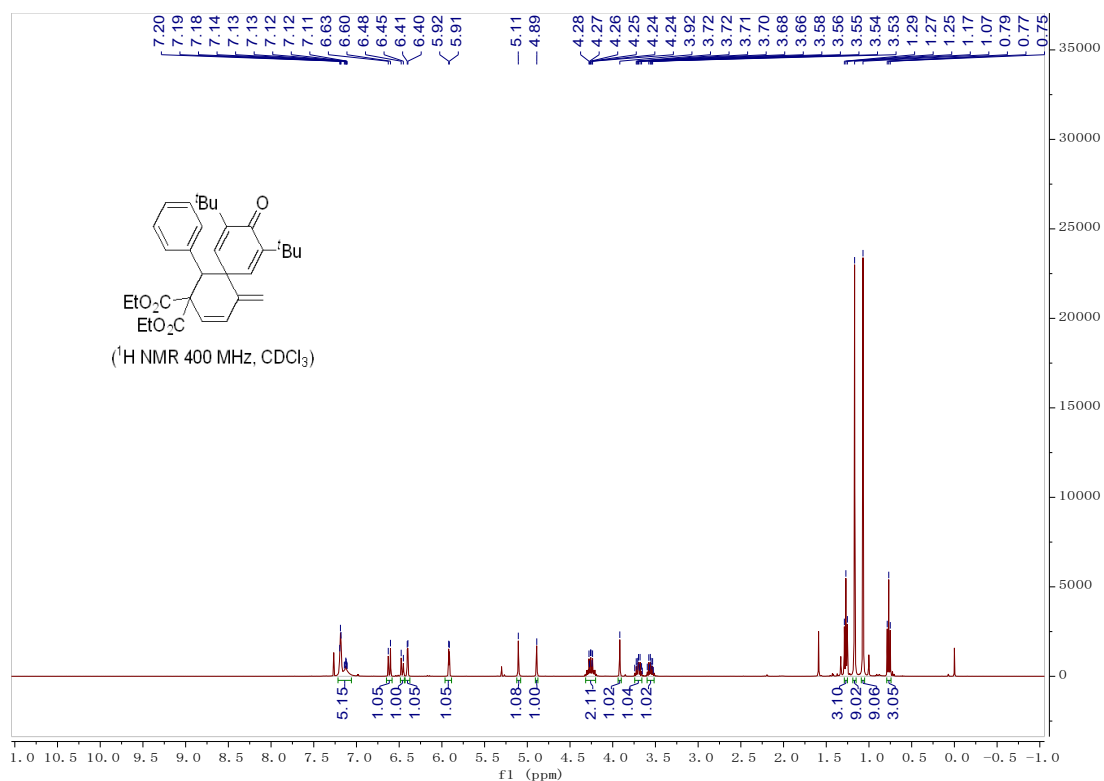

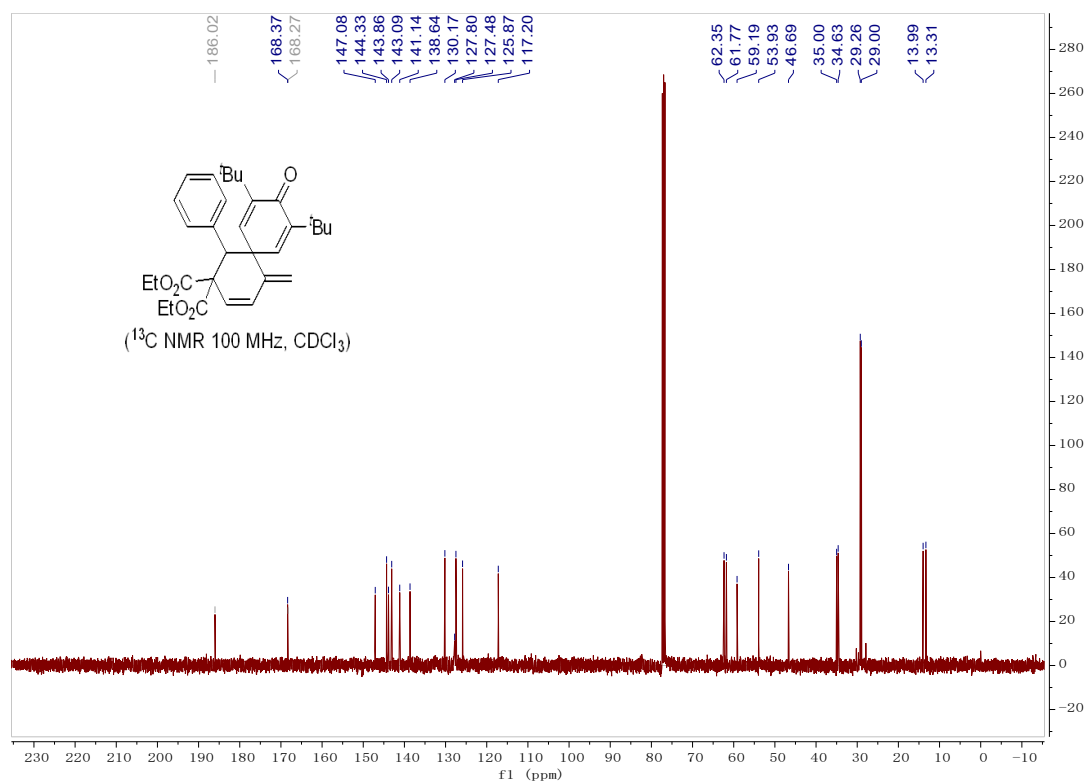

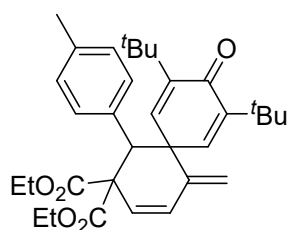

**diethyl 8,10-di-*tert*-butyl-5-methylene-9-oxo-1-(*p*-tolyl)spiro[5.5]undeca-3,7,10-triene-2,2-dicarboxylate (4b):** Yield: 60%, a pale yellow solid, m.p. 120-122 °C; Eluent: PE/EA = 30/1. Yield was determined by  $^1\text{H}$  NMR using dibromomethane as an internal standard.  $^1\text{H}$  NMR (400 MHz,  $\text{CDCl}_3$ , TMS)  $\delta$  7.01 – 6.86 (m, 4H), 6.53 (d,  $J = 10.2$  Hz, 1H), 6.38 (d,  $J = 10.2$  Hz, 1H), 6.32 (d,  $J = 3.0$  Hz, 1H), 5.88 (d,  $J = 3.0$  Hz, 1H), 5.02 (s, 1H), 4.81 (s, 1H), 4.23 – 4.11 (m, 2H), 3.80 (s, 1H), 3.69 – 3.60 (m, 1H), 3.49 (dq,  $J = 10.8, 7.2$  Hz, 1H), 2.20 (s, 3H), 1.19 (t,  $J = 7.2$  Hz, 3H), 1.09 (s, 9H), 1.01 (s, 9H), 0.73 (t,  $J = 7.2$  Hz, 3H);  $^{13}\text{C}\{^1\text{H}\}$ -NMR (100 MHz,  $\text{CDCl}_3$ , TMS)  $\delta$  186.1, 168.4, 168.3, 147.0, 144.5, 143.8, 143.2, 141.3, 137.0, 135.4, 130.2, 128.4, 125.9, 117.0, 62.3, 61.7, 59.3, 53.6, 46.8, 35.0, 34.6, 29.7, 29.3, 29.0, 21.0, 14.0, 13.4; IR (neat):  $\nu$  2996.26, 2957.10, 2864.49, 1736.51, 1716.03, 1658.55, 1637.58, 1388.56, 1365.12, 1232.21, 1181.87, 1034.91, 948.75, 727.76  $\text{cm}^{-1}$ ; HRMS (DART) Calcd for  $\text{C}_{33}\text{H}_{43}\text{O}_5$   $[\text{M}+\text{H}]^+$  : 519.3105, found: 519.3106.

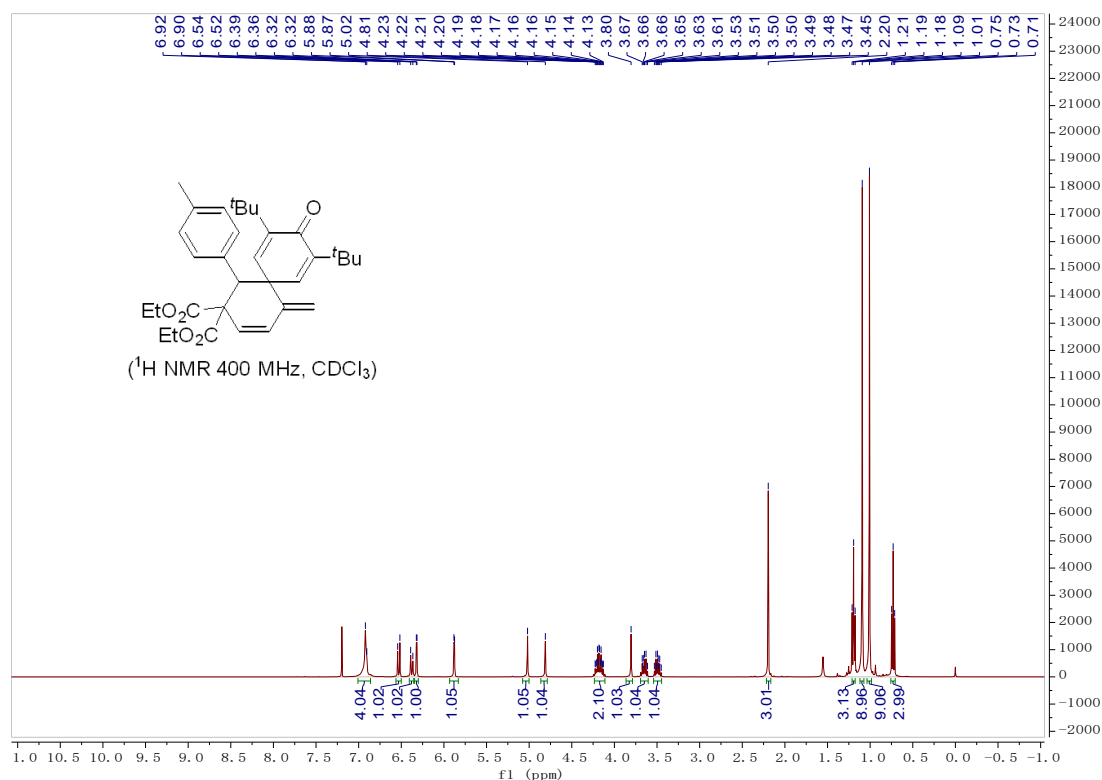

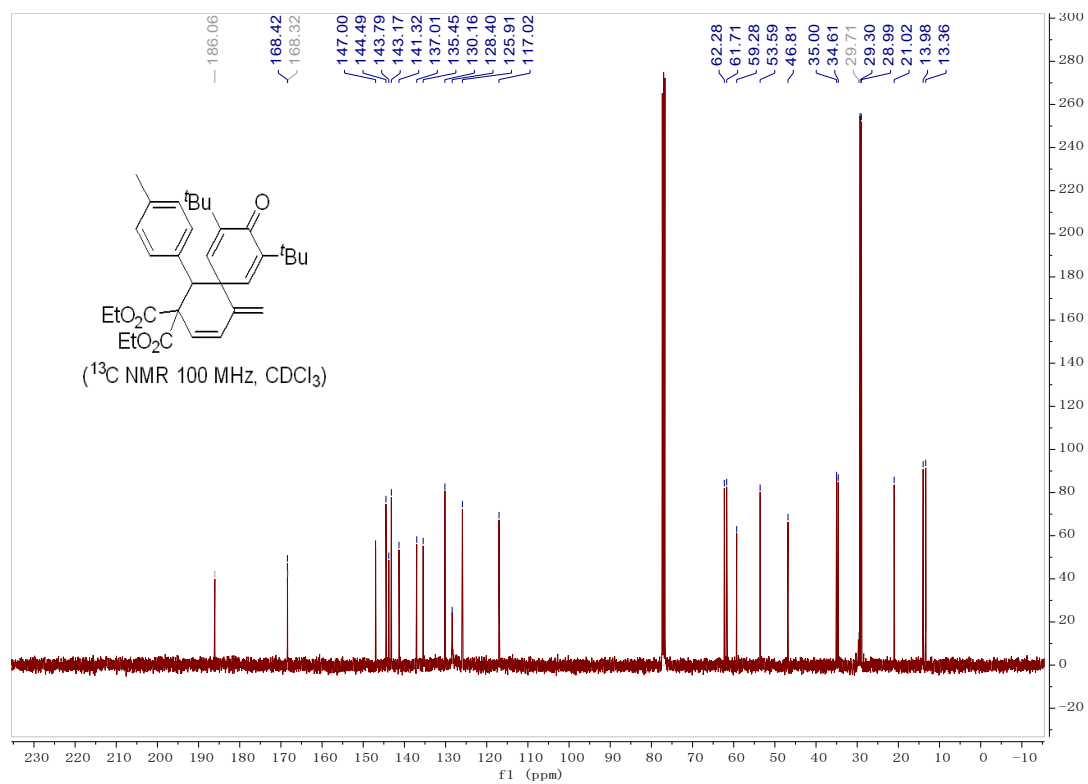

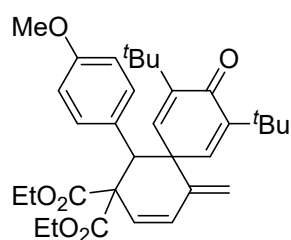

**diethyl 8,10-di-*tert*-butyl-1-(4-methoxyphenyl)-5-methylene-9-oxospiro[5.5]undeca-3,7,10-triene-2,2-dicarboxylate (4c):** Yield: 57%, a pale yellow solid, m.p. 158-160 °C; Eluent: PE/EA = 30/1. Yield was determined by  $^1\text{H}$  NMR using dibromomethane as an internal standard.  $^1\text{H}$  NMR (400 MHz,  $\text{CDCl}_3$ , TMS)  $\delta$  6.98 (s, 2H), 6.69 – 6.63 (m, 2H), 6.53 (d,  $J = 10.2$  Hz, 1H), 6.37 (d,  $J = 10.2$  Hz, 1H), 6.31 (d,  $J = 3.0$  Hz, 1H), 5.89 (d,  $J = 3.0$  Hz, 1H), 5.03 (s, 1H), 4.82 (s, 1H), 4.25 – 4.11 (m, 2H), 3.80 (s, 1H), 3.71 – 3.62 (m, 4H), 3.56 – 3.48 (m, 1H), 1.20 (t,  $J = 7.2$  Hz, 3H), 1.10 (s, 9H), 1.01 (s, 9H), 0.76 (t,  $J = 7.2$  Hz, 3H);  $^{13}\text{C}\{^1\text{H}\}$ -NMR (100 MHz,  $\text{CDCl}_3$ , TMS)  $\delta$  186.0, 168.4, 168.3, 158.8, 147.1, 144.4, 143.8, 143.1, 141.3, 130.7, 130.1, 125.9, 117.1, 113.1, 62.3, 61.7, 59.3, 55.2, 53.1, 46.9, 35.0, 34.6, 29.3, 29.0, 14.0, 13.5; IR (neat):  $\nu$  2957.34, 2901.64, 2865.11, 1736.11, 1716.07, 1658.30, 1512.70, 1279.36, 1250.67, 1180.06, 1061.53, 1036.34, 876.06, 735.86  $\text{cm}^{-1}$ ; HRMS (DART) Calcd for  $\text{C}_{33}\text{H}_{43}\text{O}_6$   $[\text{M}+\text{H}]^+$  : 535.3054, found: 535.3051.

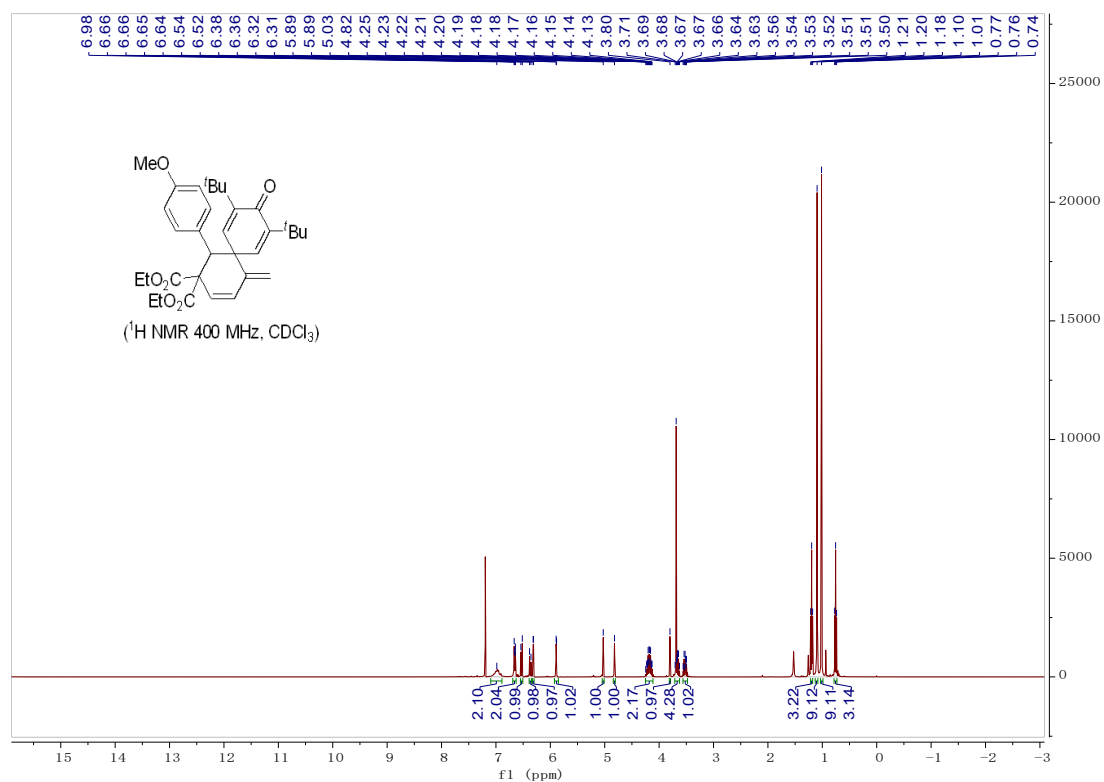

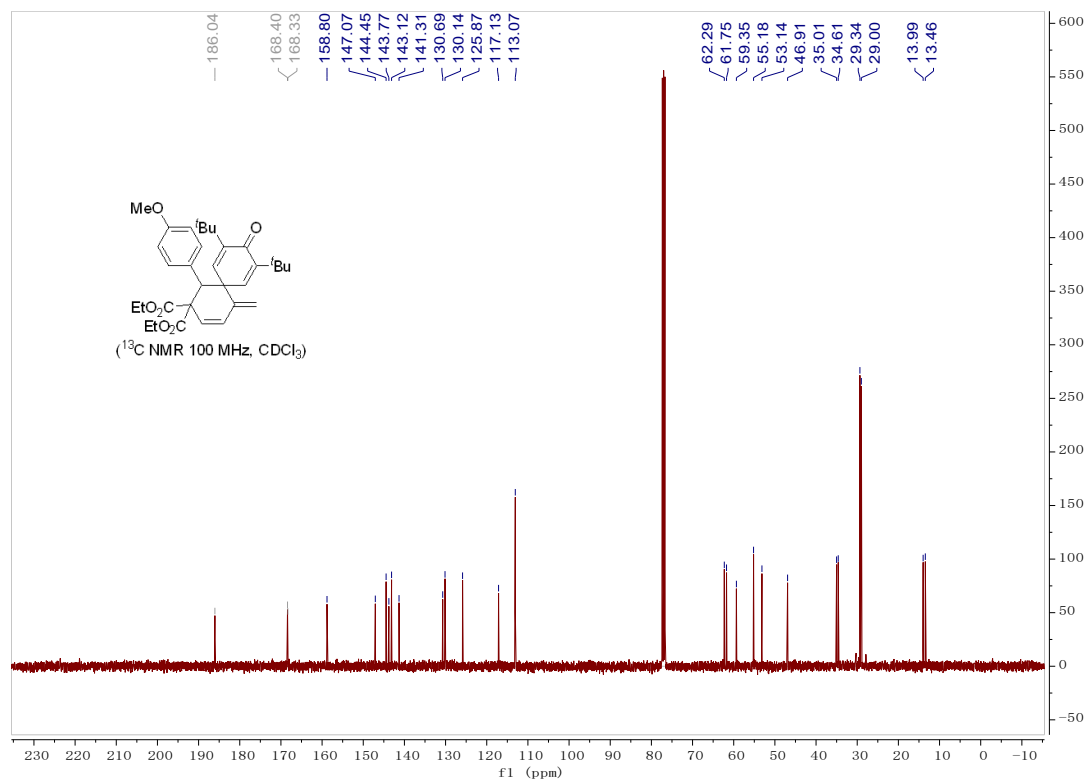



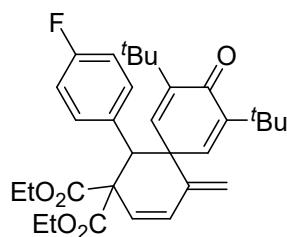

**diethyl 8,10-di-*tert*-butyl-1-(4-fluorophenyl)-5-methylene-9-oxospiro[5.5]undeca-3,7,10-triene-2,2-dicarboxylate (4d):** Yield: 70%, a colorless oil; Eluent: PE/EA = 30/1. Yield was determined by  $^1\text{H}$  NMR using dibromomethane as an internal standard.  $^1\text{H}$  NMR (400 MHz,  $\text{CDCl}_3$ , TMS)  $\delta$  7.11 (s, 2H), 6.90 (t,  $J = 8.6$  Hz, 2H), 6.61 (d,  $J = 10.2$  Hz, 1H), 6.43 (d,  $J = 10.2$  Hz, 1H), 6.37 (d,  $J = 3.0$  Hz, 1H), 5.92 (d,  $J = 3.0$  Hz, 1H), 5.12 (s, 1H), 4.91 (s, 1H), 4.31 – 4.20 (m, 2H), 3.92 (s, 1H), 3.75 (dq,  $J = 10.8, 7.2$  Hz, 1H), 3.59 (dq,  $J = 10.8, 7.2$  Hz, 1H), 1.28 (d,  $J = 7.0$  Hz, 3H), 1.16 (s, 9H), 1.09 (s, 9H), 0.83 (t,  $J = 7.0$  Hz, 3H);  $^{13}\text{C}\{^1\text{H}\}$ -NMR (100 MHz,  $\text{CDCl}_3$ , TMS)  $\delta$  185.9, 168.21, 168.16, 162.1 (d,  $J = 246$  Hz), 147.4, 144.1, 143.7, 142.8, 141.0, 134.5 (d,  $J = 3.2$  Hz), 130.1, 125.7, 117.4, 114.6 (d,  $J = 22$  Hz), 62.4, 61.8, 59.2, 53.1, 46.6, 35.0, 34.6, 29.3, 29.0, 14.0, 13.4;  $^{19}\text{F}$  NMR (376 MHz,  $\text{CDCl}_3$ )  $\delta$  -114.65; IR (neat):  $\nu$  2958.30, 2906.86, 2862.51, 1736.39, 1714.79, 1658.97, 1509.16, 1183.36, 1096.89, 1061.39, 840.57, 823.98, 784.70, 731.53  $\text{cm}^{-1}$ ; HRMS (DART) Calcd for  $\text{C}_{32}\text{H}_{40}\text{FO}_5$   $[\text{M}+\text{H}]^+$  : 523.2854, found: 523.2848.

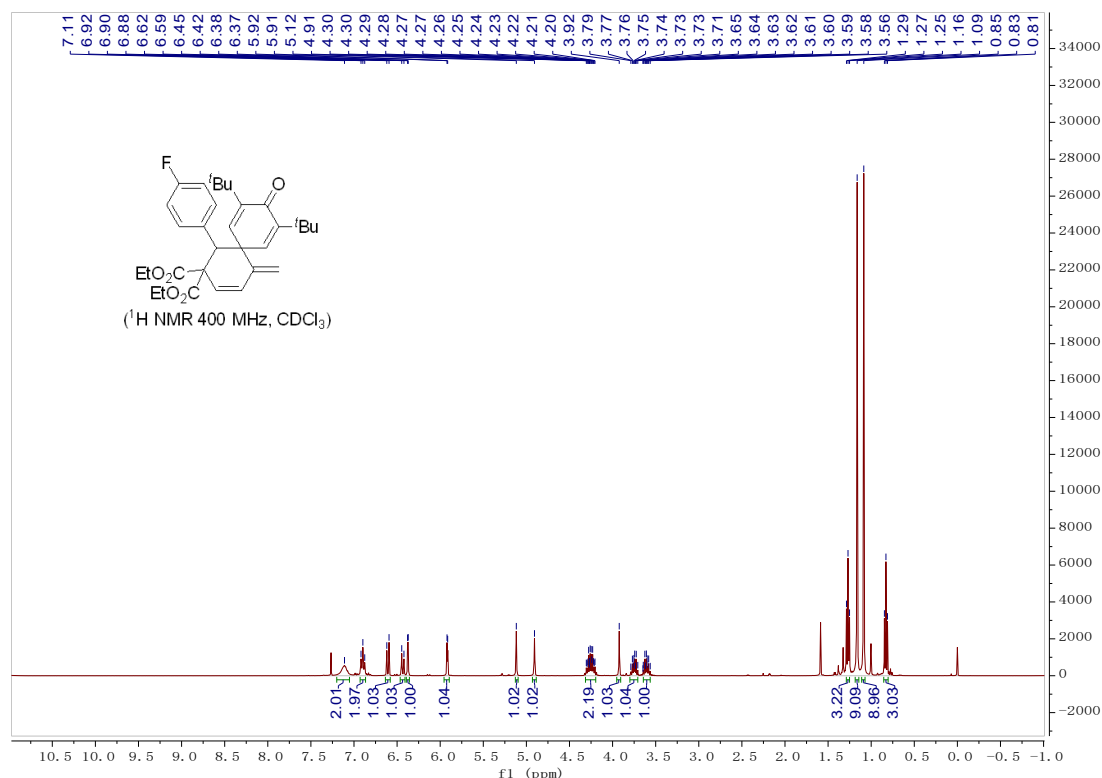

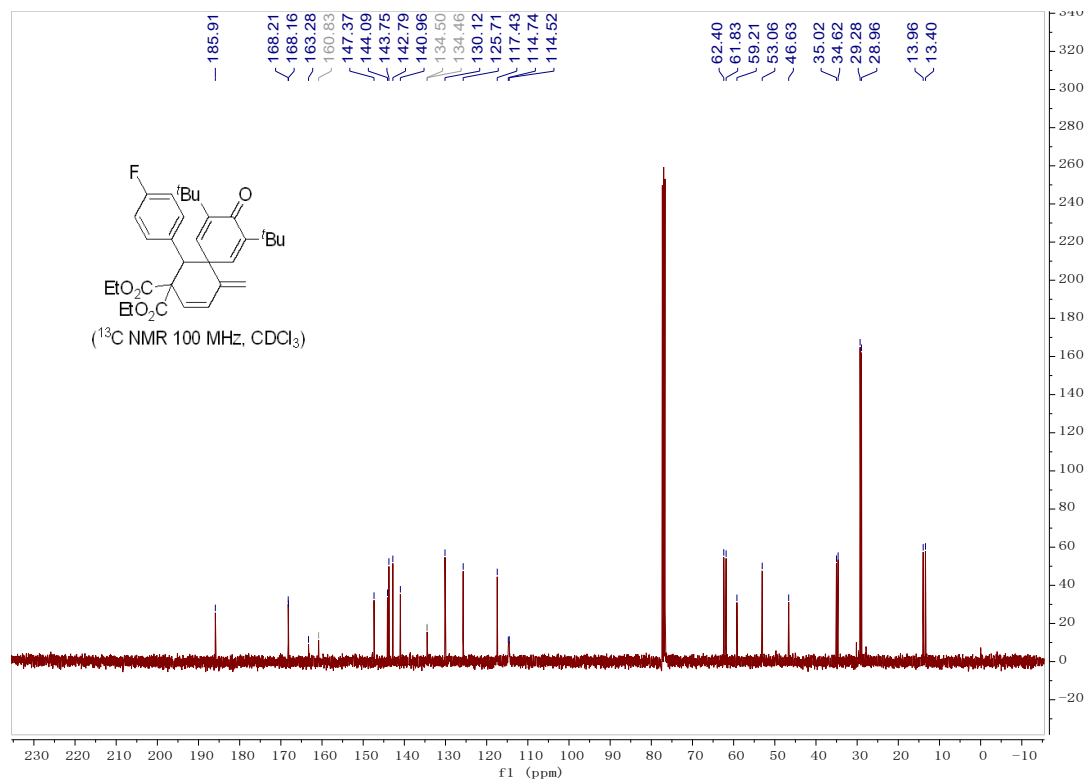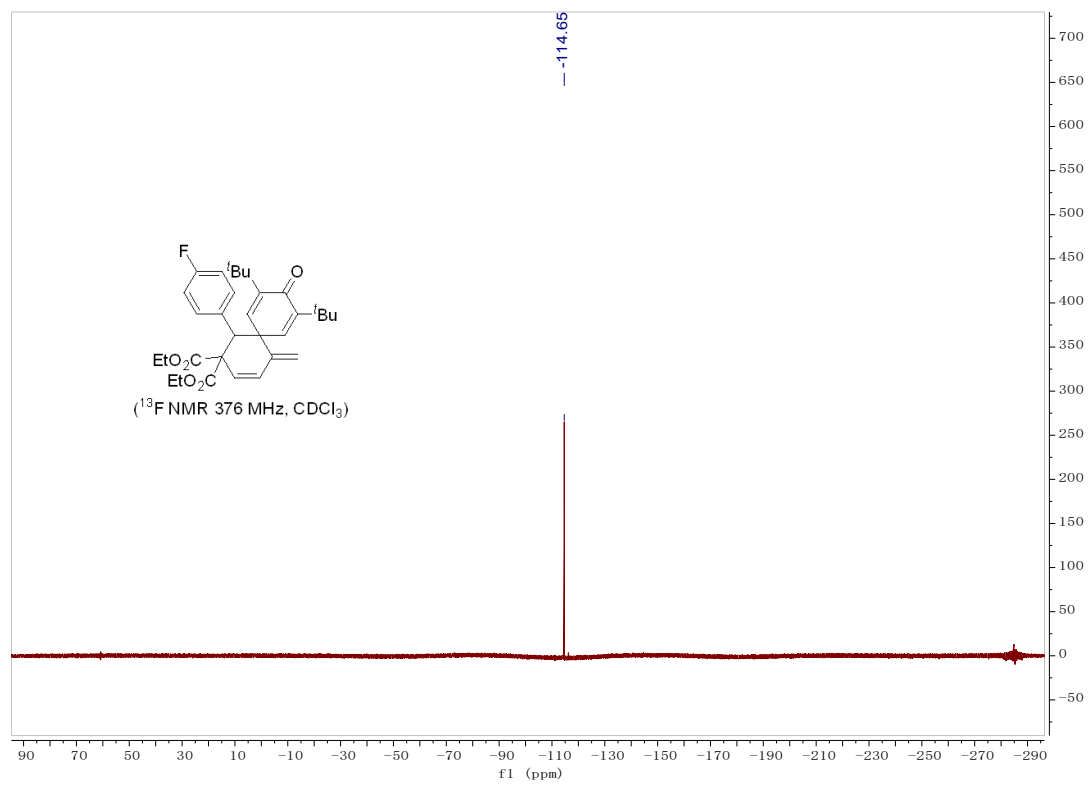

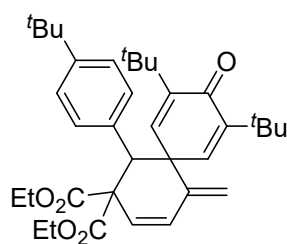

**diethyl 8,10-di-*tert*-butyl-1-(4-(*tert*-butyl)phenyl)-5-methylene-9-oxospiro[5.5]undeca-3,7,10-triene-2,2-dicarboxylate (4e):** Yield: 66%, a pale yellow solid, m.p. 132-134 °C; Eluent: PE/EA = 30/1. Yield was determined by  $^1\text{H}$  NMR using dibromomethane as an internal standard.  $^1\text{H}$  NMR (400 MHz,  $\text{CDCl}_3$ , TMS)  $\delta$  7.11 (d,  $J = 8.0$  Hz, 2H), 6.97 (s, 2H), 6.53 (d,  $J = 10.2$  Hz, 1H), 6.37 (d,  $J = 10.2$  Hz, 1H), 6.32 (d,  $J = 3.0$  Hz, 1H), 5.88 (d,  $J = 3.0$  Hz, 1H), 5.02 (s, 1H), 4.82 (s, 1H), 4.26 – 4.10 (m, 2H), 3.82 (s, 1H), 3.67 – 3.50 (m, 2H), 1.21 – 1.17 (m, 12H), 1.09 (s, 9H), 1.00 (s, 9H), 0.63 (t,  $J = 7.0$  Hz, 3H);  $^{13}\text{C}\{^1\text{H}\}$ -NMR (100 MHz,  $\text{CDCl}_3$ , TMS)  $\delta$  186.0, 168.5, 168.4, 150.4, 146.8, 144.6, 143.8, 143.2, 141.3, 135.5, 130.1, 125.9, 124.5, 117.1, 62.3, 61.7, 59.2, 53.4, 46.8, 35.0, 34.6, 34.4, 31.2, 29.2, 29.0, 14.0, 13.2; IR (neat):  $\nu$  2957.70, 2906.86, 2867.72, 1736.29, 1716.39, 1658.76, 1637.72, 1388.85, 1364.85, 1183.08, 1061.67, 1034.86, 949.25  $\text{cm}^{-1}$ ; HRMS (DART) Calcd for  $\text{C}_{36}\text{H}_{49}\text{O}_5$   $[\text{M}+\text{H}]^+$  : 561.3575, found: 561.3576.

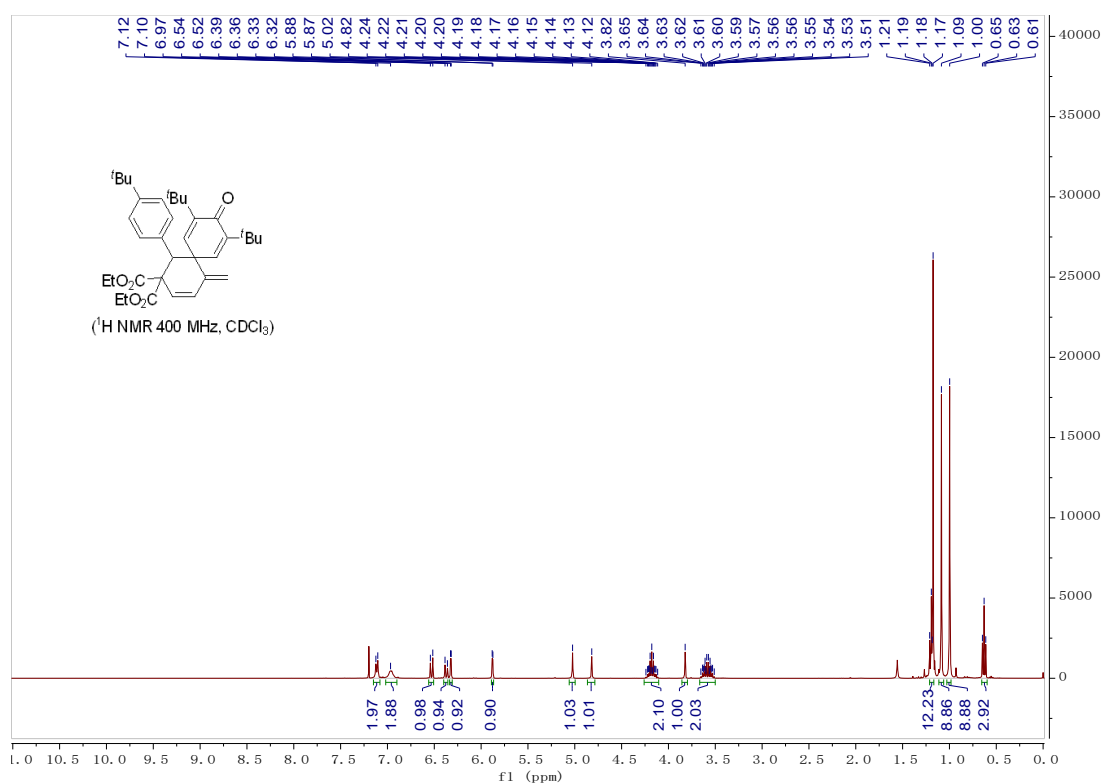

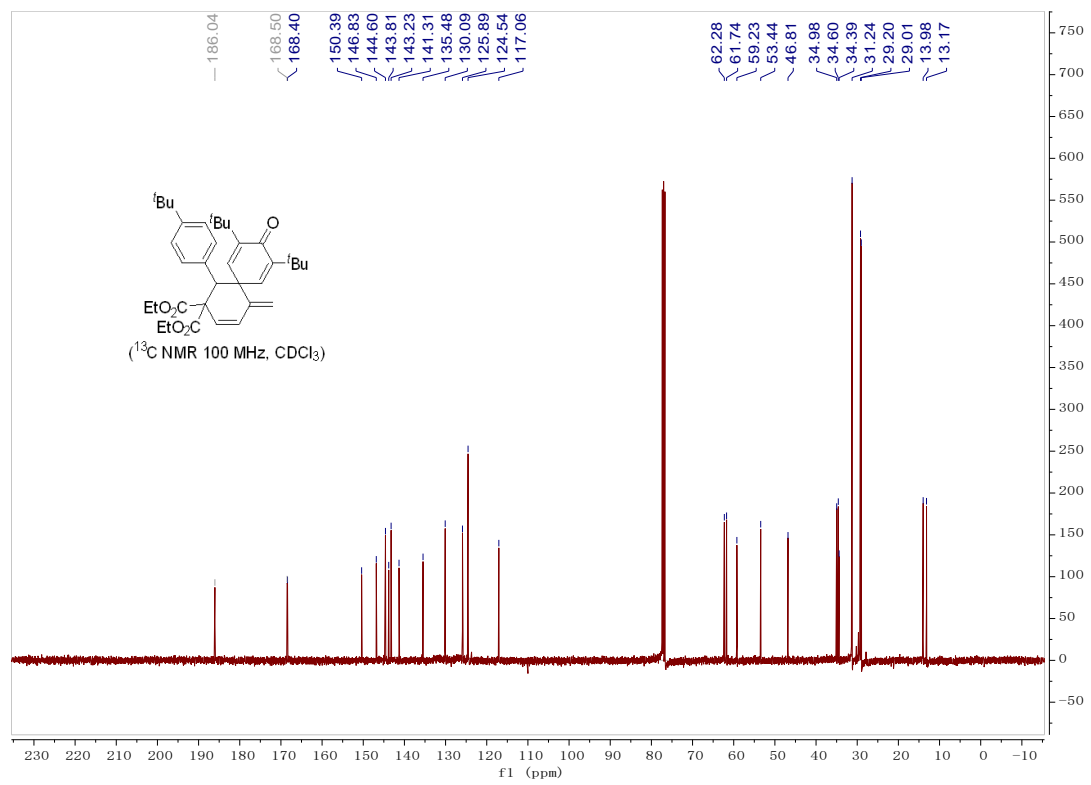

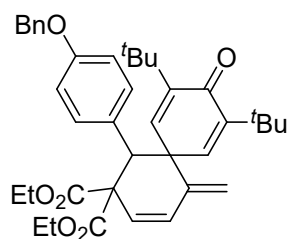

**diethyl 1-(4-(benzyloxy)phenyl)-8,10-di-*tert*-butyl-5-methylene-9-oxospiro[5.5]undeca-3,7,10-triene-2,2-dicarboxylate (4f):** Yield: 50%, a colorless oil; Eluent: PE/EA = 30/1. Yield was determined by  $^1\text{H}$  NMR using dibromomethane as an internal standard.  $^1\text{H}$  NMR (400 MHz,  $\text{CDCl}_3$ , TMS)  $\delta$  7.34 – 7.19 (m, 5H), 7.05 – 6.88 (m, 2H), 6.73 (d,  $J = 9.0$  Hz, 2H), 6.52 (d,  $J = 10.2$  Hz, 1H), 6.36 (d,  $J = 10.2$  Hz, 1H), 6.31 (d,  $J = 3.0$  Hz, 1H), 5.89 (d,  $J = 3.0$  Hz, 1H), 5.03 (s, 1H), 4.95 (s, 2H), 4.82 (s, 1H), 4.24 – 4.12 (m, 2H), 3.80 (s, 1H), 3.64 (dq,  $J = 10.8, 7.2$  Hz, 1H), 3.50 (dq,  $J = 10.8, 7.2$  Hz, 1H), 1.19 (t,  $J = 7.0$  Hz, 3H), 1.09 (s, 9H), 1.01 (s, 9H), 0.72 (t,  $J = 7.0$  Hz, 3H);  $^{13}\text{C}\{^1\text{H}\}$ -NMR (100 MHz,  $\text{CDCl}_3$ , TMS)  $\delta$  186.0, 168.4, 168.3, 157.9, 147.1, 144.5, 143.8, 143.1, 141.2, 136.9, 131.0, 130.1, 128.5, 127.9, 127.4, 125.8, 117.2, 114.2, 69.8, 62.3, 61.8, 59.3, 53.2, 46.9, 35.0, 34.6, 29.4, 29.0, 14.0, 13.4; IR (neat):  $\nu$  2957.46, 2909.47, 2857.29, 1735.77, 1714.06, 1658.09, 1510.32, 1363.96, 1220.79, 1179.93, 1061.44, 948.90, 875.89  $\text{cm}^{-1}$ ; HRMS (DART) Calcd for  $\text{C}_{39}\text{H}_{47}\text{O}_6$   $[\text{M}+\text{H}]^+$  : 611.3367, found: 611.3370.

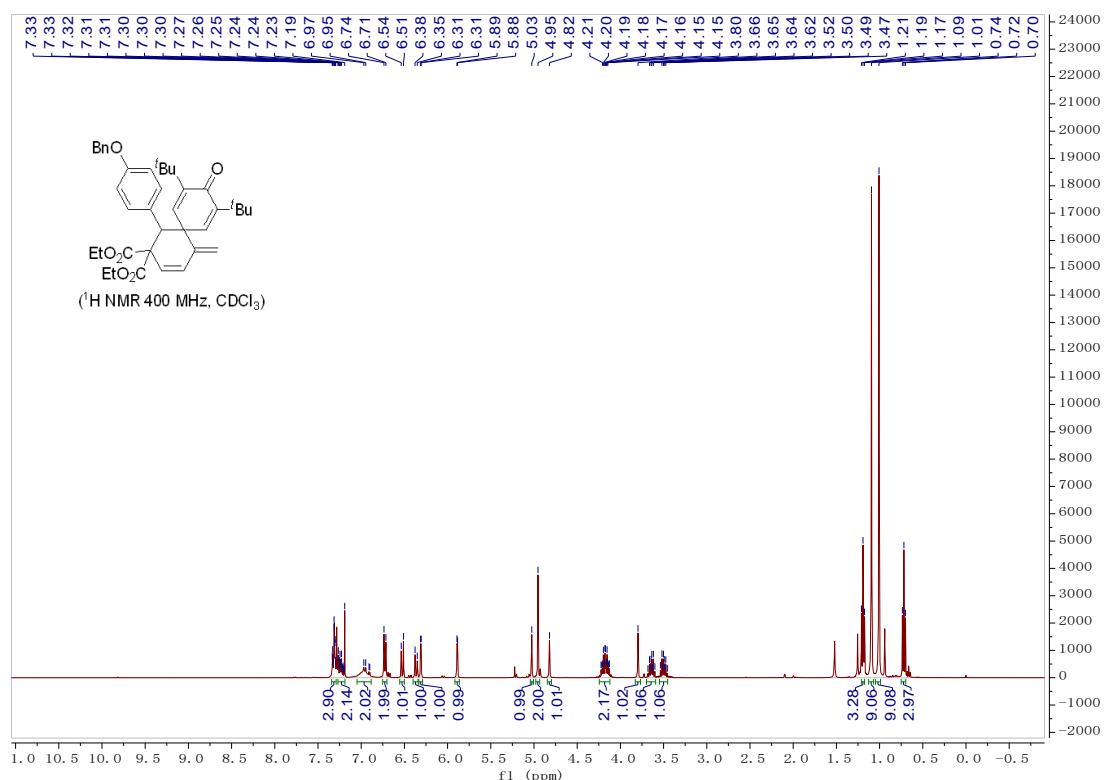

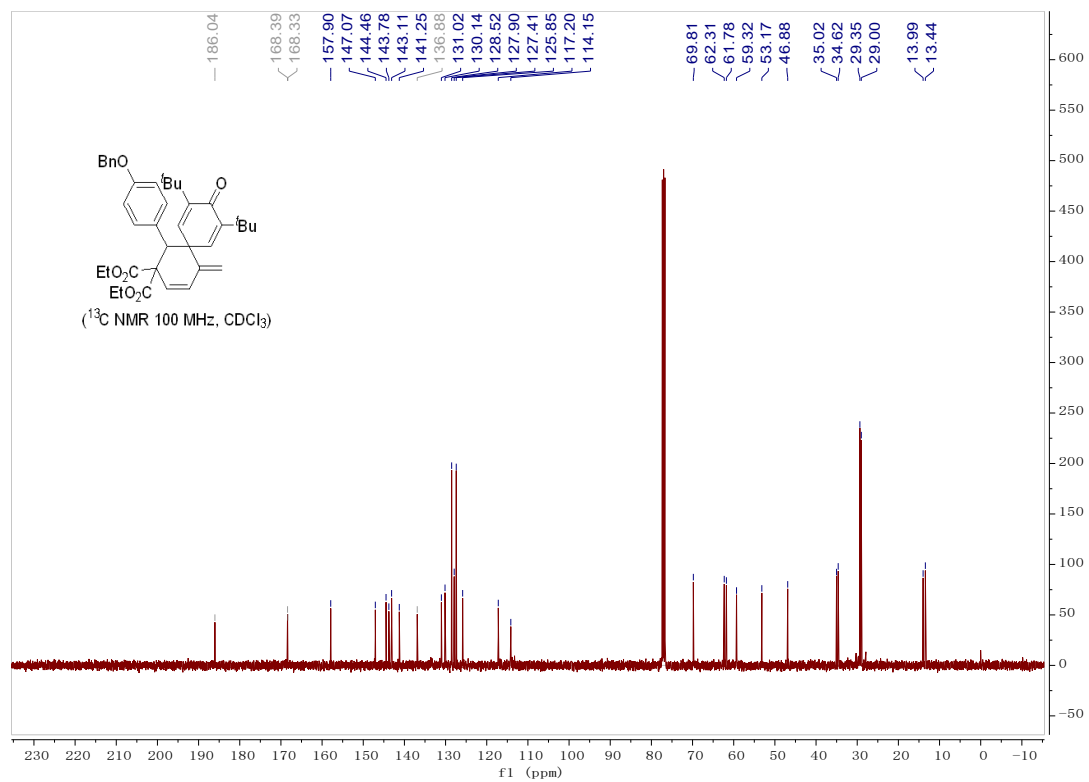

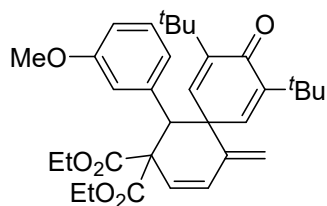

**diethyl 8,10-di-*tert*-butyl-1-(3-methoxyphenyl)-5-methylene-9-oxospiro[5.5]undeca-3,7,10-triene-2,2-dicarboxylate (4g):** Yield: 49%, a colorless oil; Eluent: PE/EA = 30/1. Yield was determined by  $^1\text{H}$  NMR using dibromomethane as an internal standard.  $^1\text{H}$  NMR (400 MHz,  $\text{CDCl}_3$ , TMS)  $\delta$  7.03 (t,  $J = 7.8$  Hz, 1H), 6.77 – 6.58 (m, 3H), 6.54 (d,  $J = 10.2$  Hz, 1H), 6.41 (d,  $J = 10.2$  Hz, 1H), 6.32 (d,  $J = 3.0$  Hz, 1H), 5.87 (d,  $J = 3.0$  Hz, 1H), 5.03 (s, 1H), 4.83 (s, 1H), 4.27 – 4.12 (m, 2H), 3.82 (s, 1H), 3.71 – 3.61 (m, 4H), 3.60 – 3.49 (m, 1H), 1.20 (t,  $J = 7.0$  Hz, 3H), 1.10 (s, 9H), 1.01 (s, 9H), 0.72 (t,  $J = 7.0$  Hz, 3H);  $^{13}\text{C}\{^1\text{H}\}$ -NMR (100 MHz,  $\text{CDCl}_3$ , TMS)  $\delta$  186.0, 168.4, 168.2, 147.1, 144.4, 143.8, 143.0, 141.2, 140.1, 130.1, 117.2, 62.4, 61.8, 59.2, 55.1, 46.6, 35.0, 34.6, 29.3, 29.0, 14.0, 13.4; IR (neat):  $\nu$  2996.26, 2956.72, 2903.74, 2867.29, 1736.40, 1658.52, 1639.50, 1488.29, 1388.54, 1365.53, 1232.64, 1185.22, 1117.69, 1057.96, 719.26  $\text{cm}^{-1}$ ; HRMS (DART) Calcd for  $\text{C}_{33}\text{H}_{43}\text{O}_6$   $[\text{M}+\text{H}]^+$  : 535.3054, found: 535.3053.

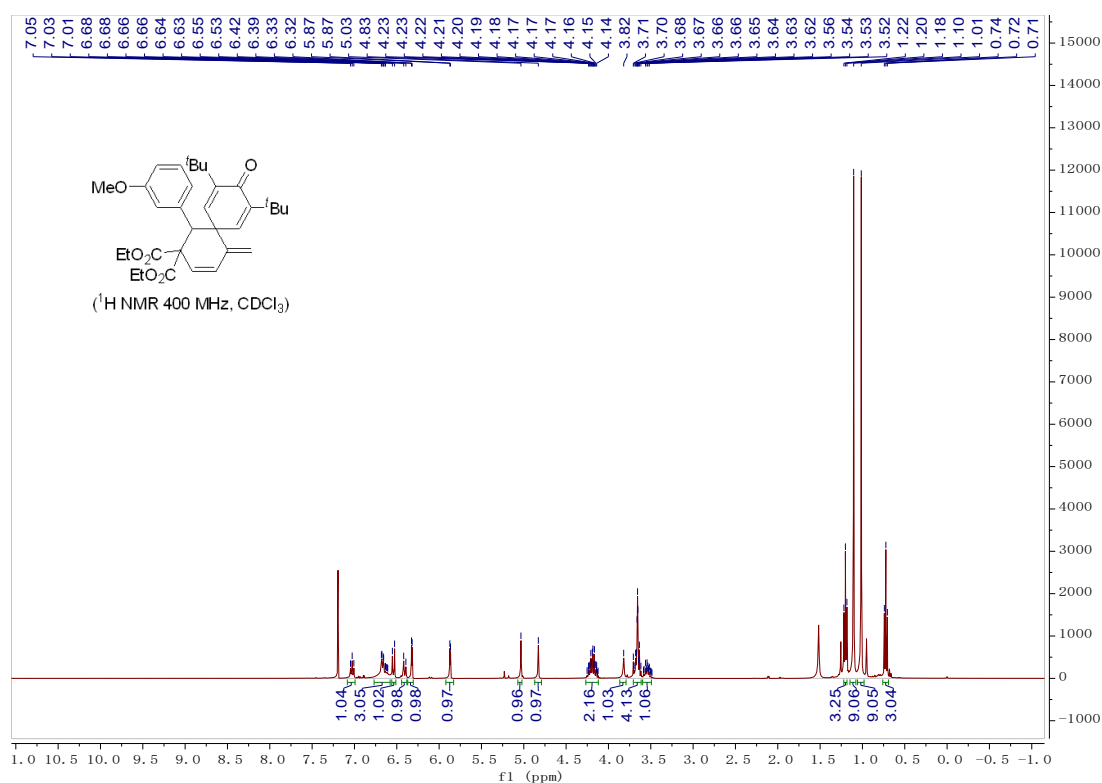

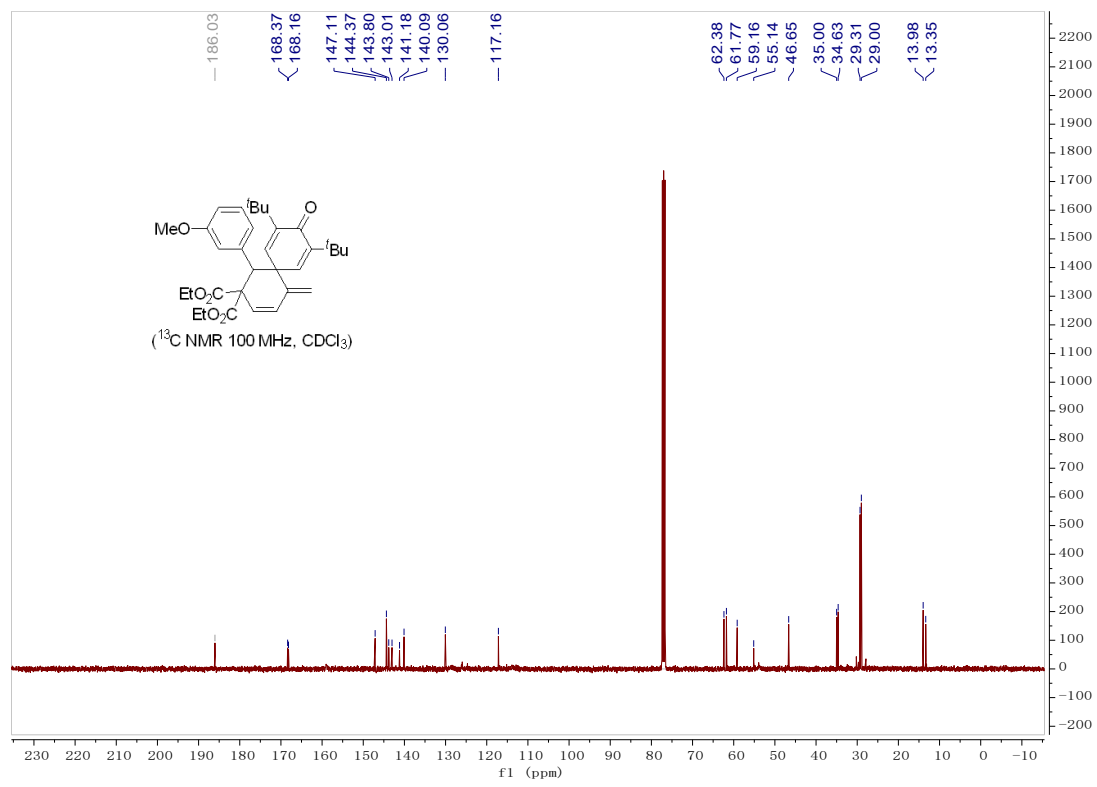



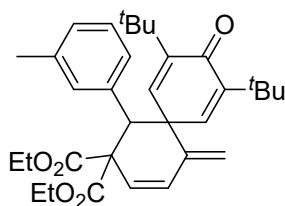

**diethyl 8,10-di-*tert*-butyl-5-methylene-9-oxo-1-(*m*-tolyl)spiro[5.5]undeca-3,7,10-triene-2,2-dicarboxylate (4h):** Yield: 52%, a colorless oil; Eluent: PE/EA = 30/1. Yield was determined by  $^1\text{H}$  NMR using dibromomethane as an internal standard.  $^1\text{H}$  NMR (400 MHz,  $\text{CDCl}_3$ , TMS)  $\delta$  7.07 (t,  $J = 7.6$  Hz, 1H), 7.02 – 6.87 (m, 3H), 6.60 (d,  $J = 10.2$  Hz, 1H), 6.46 (d,  $J = 10.2$  Hz, 1H), 6.39 (d,  $J = 3.0$  Hz, 1H), 5.95 (s, 1H), 5.09 (s, 1H), 4.88 (s, 1H), 4.32 – 4.20 (m, 2H), 3.88 (s, 1H), 3.76 – 3.56 (m, 2H), 2.25 (s, 3H), 1.27 (t,  $J = 7.0$  Hz, 3H), 1.16 (s, 9H), 1.08 (s, 9H), 0.76 (t,  $J = 7.0$  Hz, 3H);  $^{13}\text{C}\{^1\text{H}\}$ -NMR (100 MHz,  $\text{CDCl}_3$ , TMS)  $\delta$  186.1, 168.4, 168.3, 146.9, 143.9, 143.2, 141.2, 138.5, 130.1, 128.0, 125.9, 117.0, 62.3, 61.7, 59.2, 46.7, 35.0, 34.6, 29.3, 29.0, 14.0, 13.3; IR (neat):  $\nu$  2957.08, 2903.74, 2864.49, 1736.86, 1658.35, 1636.16, 1486.10, 1388.58, 1232.27, 1185.28, 1118.08, 1061.86, 898.78  $\text{cm}^{-1}$ ; HRMS (DART) Calcd for  $\text{C}_{33}\text{H}_{43}\text{O}_5$   $[\text{M}+\text{H}]^+$  : 519.3105, found: 519.3102.

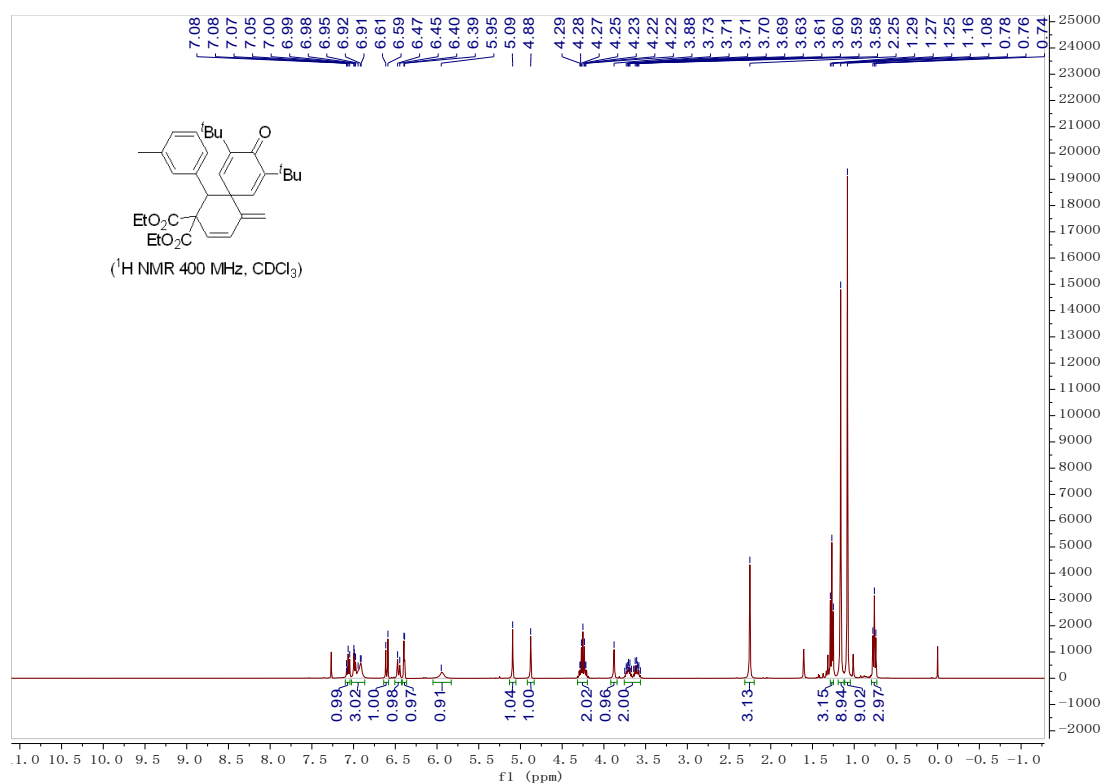



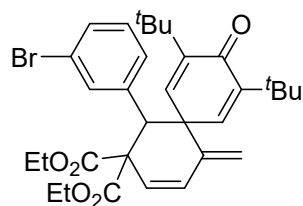

**diethyl 1-(3-bromophenyl)-8,10-di-*tert*-butyl-5-methylene-9-oxospiro[5.5]undeca-3,7,10-triene-2,2-dicarboxylate (4i):** Yield: 67%, a colorless oil; Eluent: PE/EA = 30/1. Yield was determined by  $^1\text{H}$  NMR using dibromomethane as an internal standard.  $^1\text{H}$  NMR (400 MHz,  $\text{CDCl}_3$ , TMS)  $\delta$  7.29 – 7.25 (m, 1H), 7.20 (d,  $J = 3.6$  Hz, 1H), 7.07 – 6.96 (m, 2H), 6.53 (d,  $J = 10.2$  Hz, 1H), 6.36 (d,  $J = 10.2$  Hz, 1H), 6.29 (d,  $J = 3.0$  Hz, 1H), 5.91 (s, 1H), 5.05 (s, 1H), 4.84 (s, 1H), 4.26 – 4.12 (m, 2H), 3.82 (s, 1H), 3.77 – 3.57 (m, 2H), 1.20 (t,  $J = 7.0$  Hz, 3H), 1.08 (s, 9H), 1.04 (s, 9H), 0.76 (t,  $J = 7.0$  Hz, 3H);  $^{13}\text{C}\{^1\text{H}\}$ -NMR (100 MHz,  $\text{CDCl}_3$ , TMS)  $\delta$  185.9, 168.2, 168.1, 147.5, 144.5, 143.5, 142.6, 141.0, 140.8, 130.5, 130.2, 129.5, 125.7, 121.7, 117.5, 62.5, 62.0, 59.1, 53.6, 46.5, 35.1, 34.7, 29.3, 29.0, 14.0, 13.3; IR (neat):  $\nu$  2958.03, 2906.86, 2862.51, 1659.12, 1638.93, 1591.82, 1474.46, 1388.97, 1184.31, 1096.91, 1077.31, 1061.41  $\text{cm}^{-1}$ ; HRMS (ESI-TOF) Calcd for  $\text{C}_{32}\text{H}_{40}\text{BrO}_5$   $[\text{M}+\text{H}]^+$  : 583.2054, found: 583.2061.

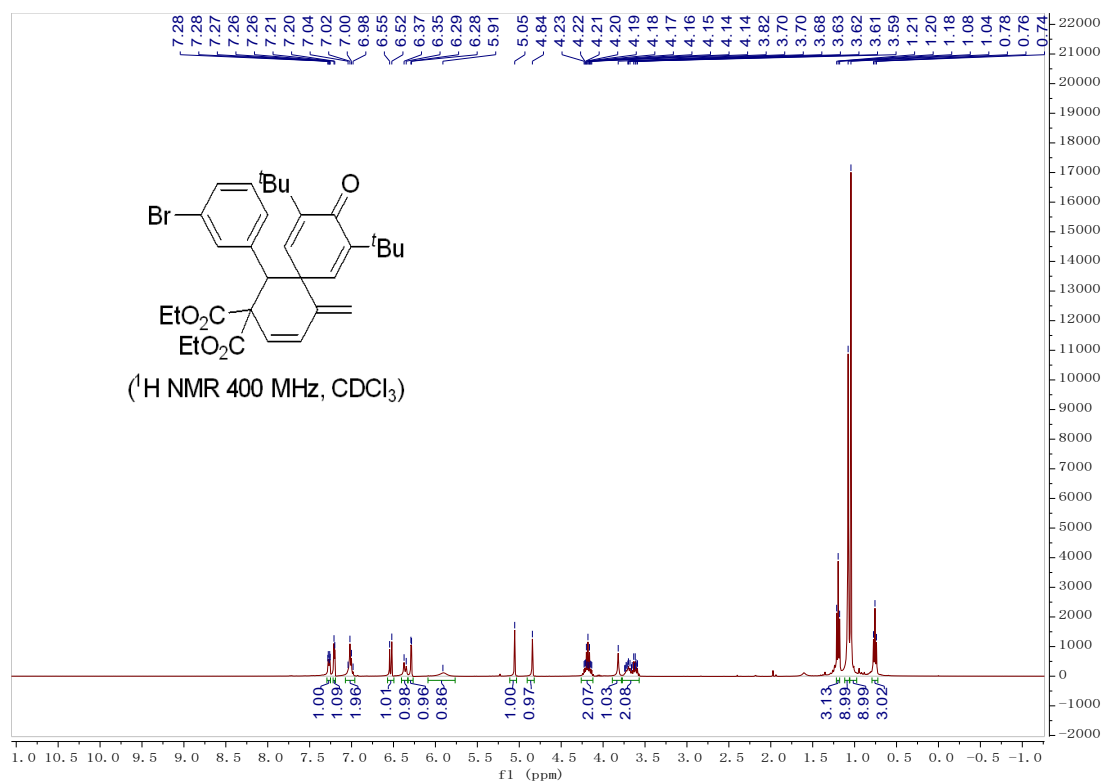

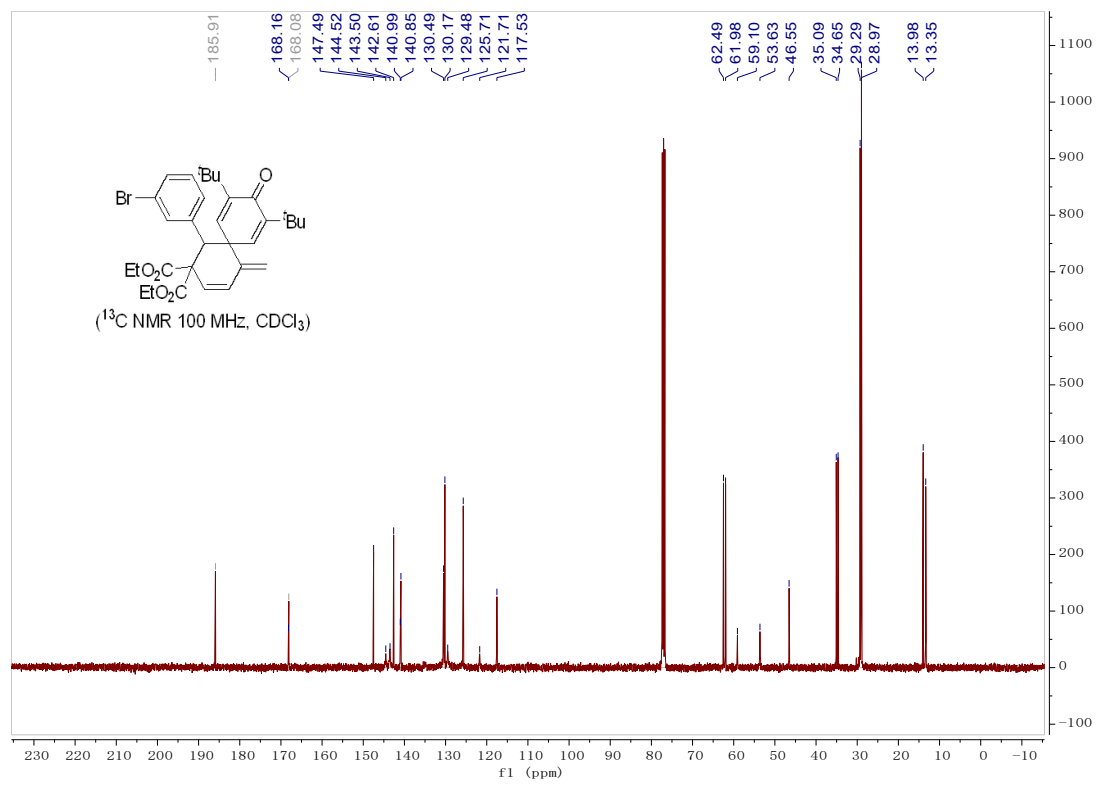

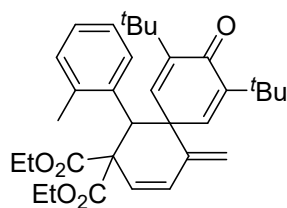

**diethyl 8,10-di-*tert*-butyl-5-methylene-9-oxo-1-(*o*-tolyl)spiro[5.5]undeca-3,7,10-triene-2,2-dicarboxylate (4j):** Yield: 37%, a pale yellow solid, m.p. 158-160 °C; Eluent: PE/EA = 30/1. Yield was determined by  $^1\text{H}$  NMR using dibromomethane as an internal standard.  $^1\text{H}$  NMR (400 MHz,  $\text{CDCl}_3$ , TMS)  $\delta$  7.10 (d,  $J = 7.2$  Hz, 1H), 7.02 – 6.93 (m, 3H), 6.56 (d,  $J = 10.2$  Hz, 1H), 6.44 – 6.36 (m, 2H), 5.80 (d,  $J = 3.0$  Hz, 1H), 5.04 (s, 1H), 4.81 (s, 1H), 4.30 (s, 1H), 4.24 – 4.14 (m, 2H), 3.59 (dq,  $J = 10.8, 7.2$  Hz, 1H), 3.42 (dq,  $J = 10.8, 7.2$  Hz, 1H), 2.18 (s, 3H), 1.21 (t,  $J = 7.0$  Hz, 3H), 1.12 (s, 9H), 0.97 (s, 9H), 0.70 (t,  $J = 7.0$  Hz, 3H);  $^{13}\text{C}\{^1\text{H}\}$ -NMR (100 MHz,  $\text{CDCl}_3$ , TMS)  $\delta$  185.9, 168.5, 168.2, 147.4, 143.5, 143.3, 143.2, 140.9, 137.5, 137.1, 130.2, 130.0, 127.6, 127.3, 126.1, 126.0, 117.2, 62.3, 61.7, 59.1, 46.6, 46.2, 34.9, 34.6, 29.2, 29.0, 21.1, 14.0, 13.2; IR (neat):  $\nu$  2957.61, 2867.29, 1737.48, 1658.31, 1637.36, 1486.21, 1389.19, 1234.68, 1188.05, 1095.99, 1060.41, 877.13  $\text{cm}^{-1}$ ; HRMS (DART) Calcd for  $\text{C}_{33}\text{H}_{43}\text{O}_5$   $[\text{M}+\text{H}]^+$  : 519.3105, found: 519.3101.

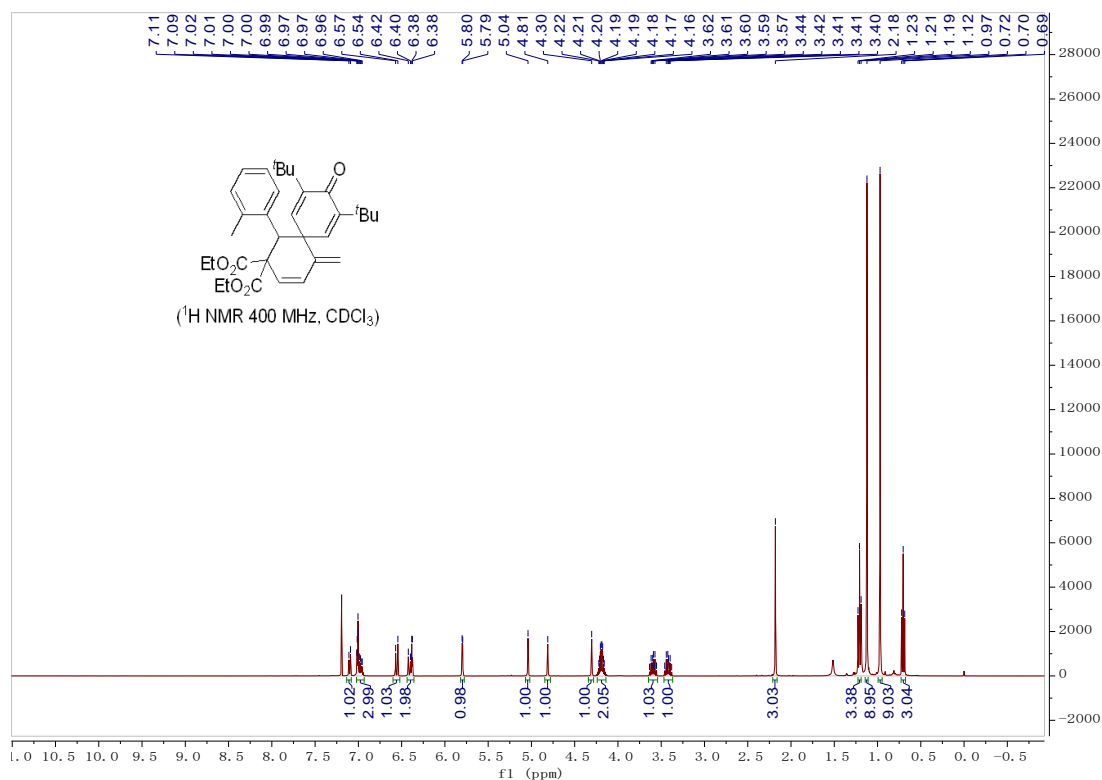

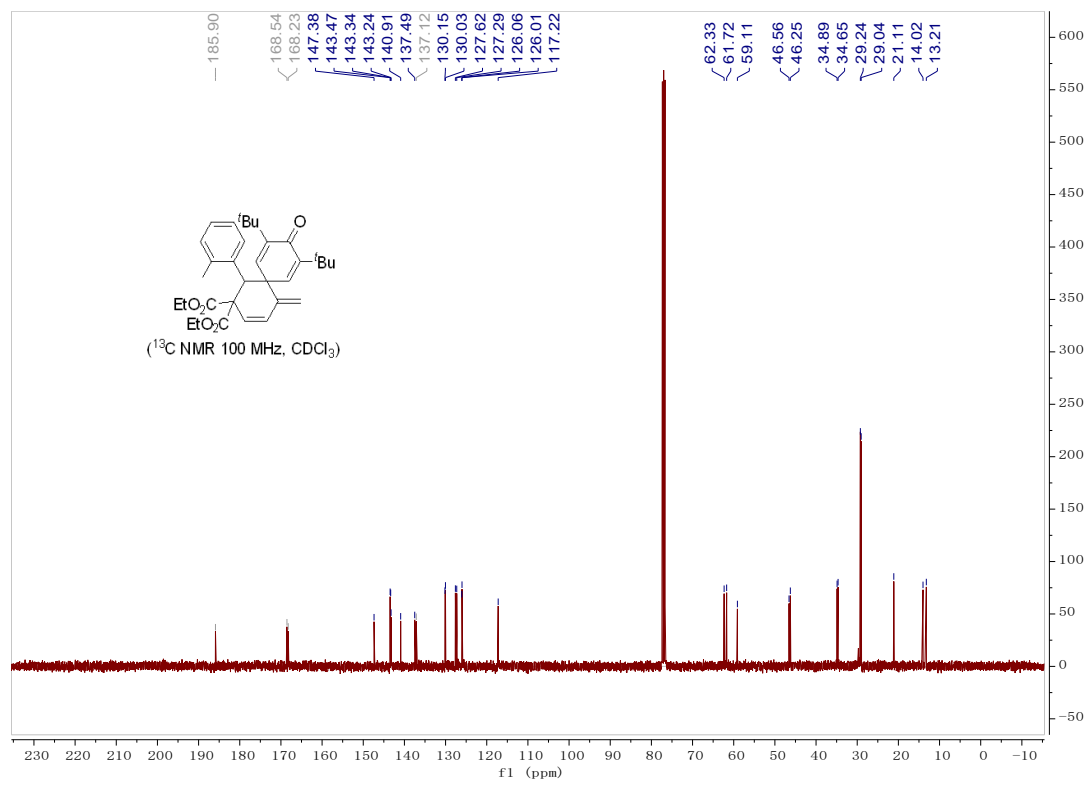

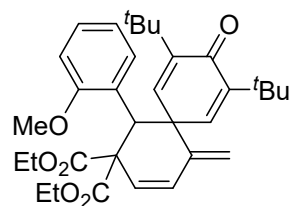

**diethyl 8,10-di-tert-butyl-1-(2-methoxyphenyl)-5-methylene-9-oxospiro[5.5]undeca-3,7,10-triene-2,2-dicarboxylate (4k):** Yield: 50%, a pale yellow solid, m.p. 149-151 °C; Eluent: PE/EA = 30/1. Yield was determined by  $^1\text{H}$  NMR using dibromomethane as an internal standard.  $^1\text{H}$  NMR (400 MHz,  $\text{CDCl}_3$ , TMS)  $\delta$  7.14 – 7.07 (m, 2H), 6.73 – 6.68 (m, 2H), 6.54 (d,  $J = 10.2$  Hz, 1H), 6.44 – 6.39 (m, 1H), 6.37 (d,  $J = 3.0$  Hz, 1H), 5.87 (d,  $J = 3.0$  Hz, 1H), 4.99 (s, 1H), 4.79 (s, 1H), 4.69 (s, 1H), 4.22 – 4.11 (m, 2H), 3.69 (s, 3H), 3.65 – 3.57 (m, 1H), 3.54 – 3.45 (m, 1H), 1.19 (t,  $J = 7.0$  Hz, 3H), 1.11 (s, 9H), 0.99 (s, 9H), 0.68 (t,  $J = 7.0$  Hz, 3H);  $^{13}\text{C}\{^1\text{H}\}$ -NMR (100 MHz,  $\text{CDCl}_3$ , TMS)  $\delta$  185.9, 168.4, 157.1, 147.3, 143.4, 143.3, 141.3, 130.4, 128.9, 128.4, 126.9, 126.3, 119.9, 116.9, 109.4, 62.2, 61.5, 59.2, 55.3, 46.8, 42.0, 34.9, 34.6, 29.3, 29.1, 14.0, 13.2; IR (neat):  $\nu$  3004.67, 2956.77, 2912.15, 2861.68, 1735.68, 1715.26, 1657.98, 1634.51, 1491.63, 1245.04, 1058.50, 754.70  $\text{cm}^{-1}$ ; HRMS (DART) Calcd for  $\text{C}_{33}\text{H}_{43}\text{O}_6$   $[\text{M}+\text{H}]^+$  : 535.3054, found: 535.3054.

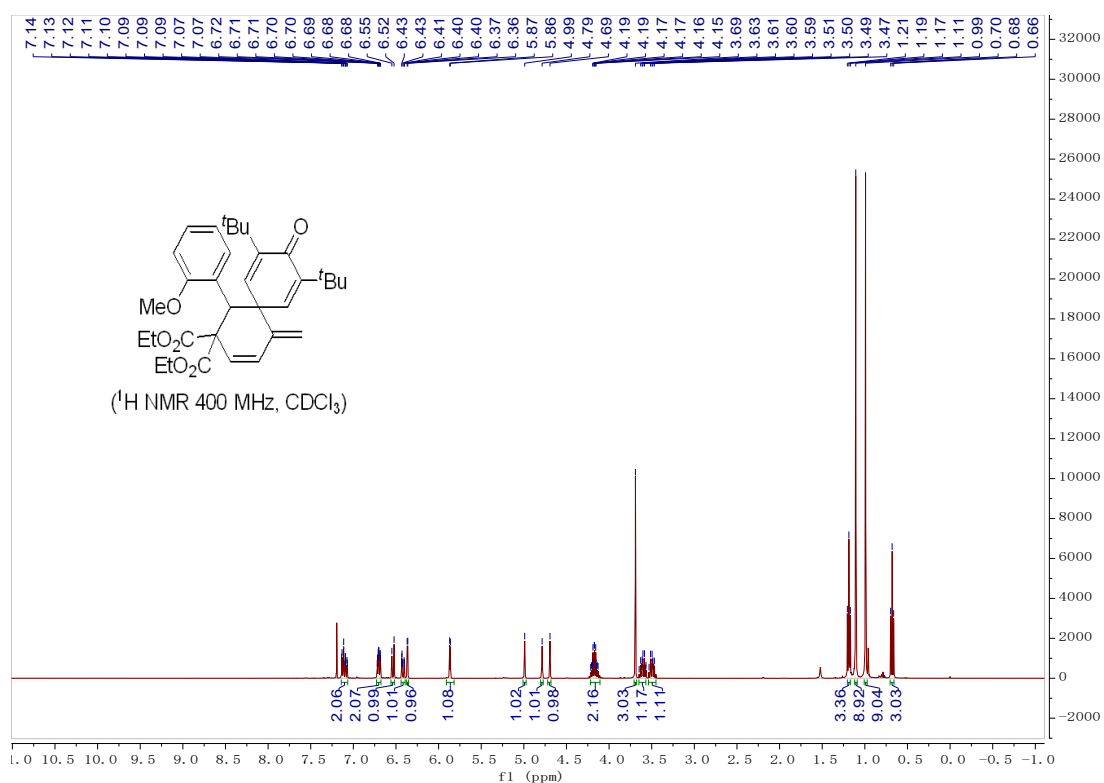

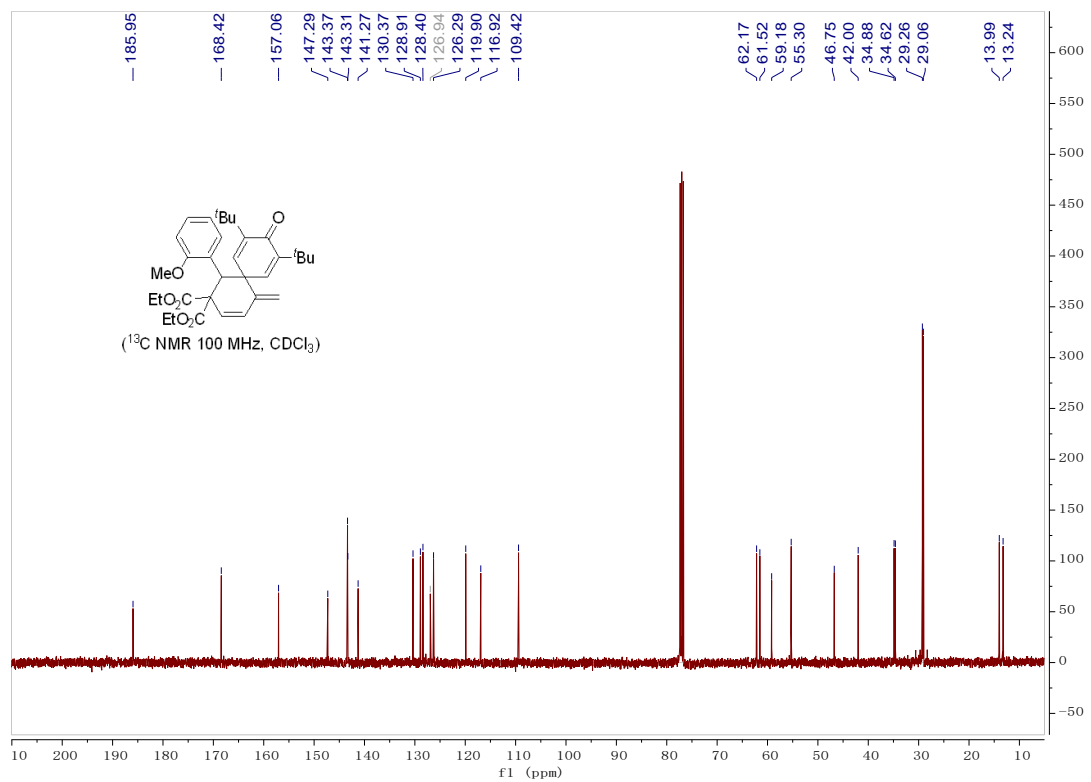



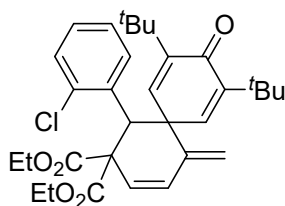

**diethyl 8,10-di-*tert*-butyl-1-(2-chlorophenyl)-5-methylene-9-oxospiro[5.5]undeca-3,7,10-triene-2,2-dicarboxylate (4l)**: Yield: 70%, a pale yellow solid, m.p. 178-180 °C; Eluent: PE/EA = 30/1. Yield was determined by  $^1\text{H}$  NMR using dibromomethane as an internal standard.  $^1\text{H}$  NMR (400 MHz,  $\text{CDCl}_3$ , TMS)  $\delta$  7.29 – 7.20 (m, 2H), 7.10 – 7.00 (m, 2H), 6.56 (d,  $J = 10.2$  Hz, 1H), 6.41 (d,  $J = 10.2$  Hz, 1H), 6.36 (d,  $J = 3.0$  Hz, 1H), 5.77 (d,  $J = 3.0$  Hz, 1H), 5.04 (s, 1H), 4.83 (s, 1H), 4.77 (s, 1H), 4.23 – 4.13 (m, 2H), 3.69 – 3.62 (m, 1H), 3.50 (dq,  $J = 10.8, 7.2$  Hz, 1H), 1.20 (t,  $J = 7.0$  Hz, 3H), 1.11 (s, 9H), 1.02 (s, 9H), 0.76 (t,  $J = 7.0$  Hz, 3H);  $^{13}\text{C}\{^1\text{H}\}$ -NMR (100 MHz,  $\text{CDCl}_3$ , TMS)  $\delta$  185.7, 168.11, 168.06, 147.9, 143.8, 142.6, 142.0, 140.7, 136.5, 135.6, 130.3, 129.4, 129.3, 128.5, 126.6, 125.9, 117.5, 62.4, 61.9, 59.0, 46.7, 46.5, 35.0, 34.7, 29.2, 29.0, 14.0, 13.2; IR (neat):  $\nu$  2957.67, 2920.56, 2861.68, 1732.83, 1655.84, 1633.73, 1387.22, 1364.19, 1238.51, 1196.34, 1097.14, 750.83  $\text{cm}^{-1}$ ; HRMS (DART) Calcd for  $\text{C}_{32}\text{H}_{40}\text{O}_5\text{Cl} [\text{M}+\text{H}]^+$  : 539.2559, found: 539.2564.

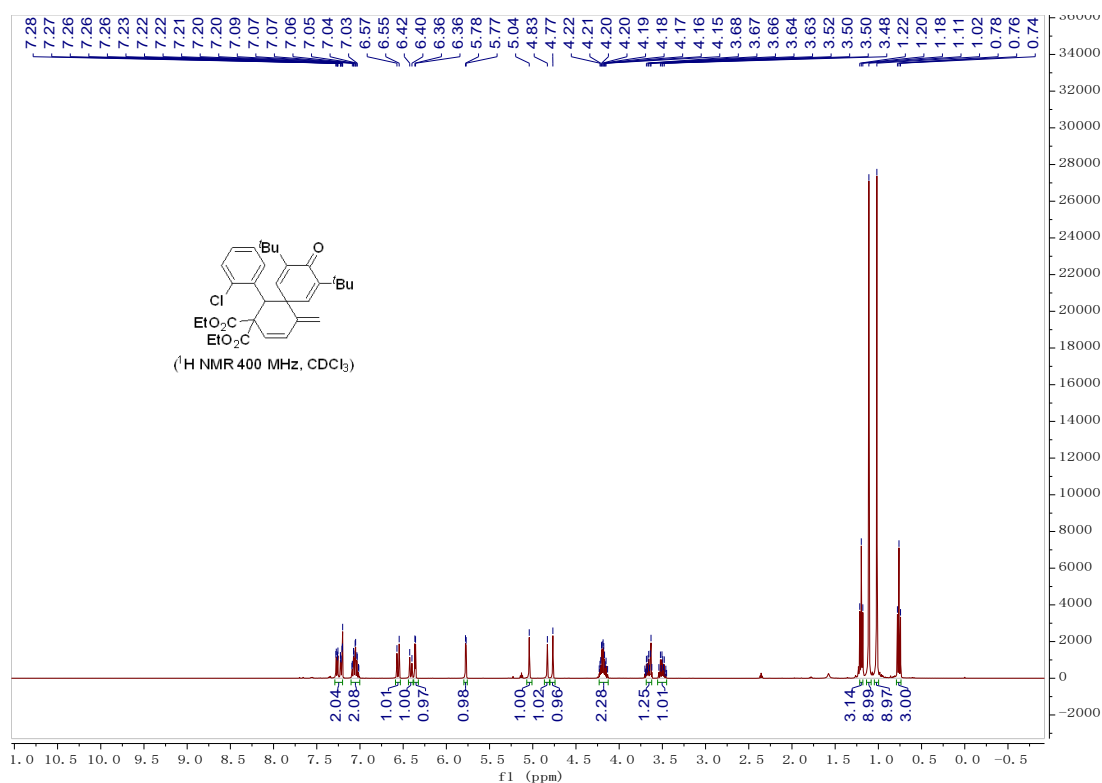

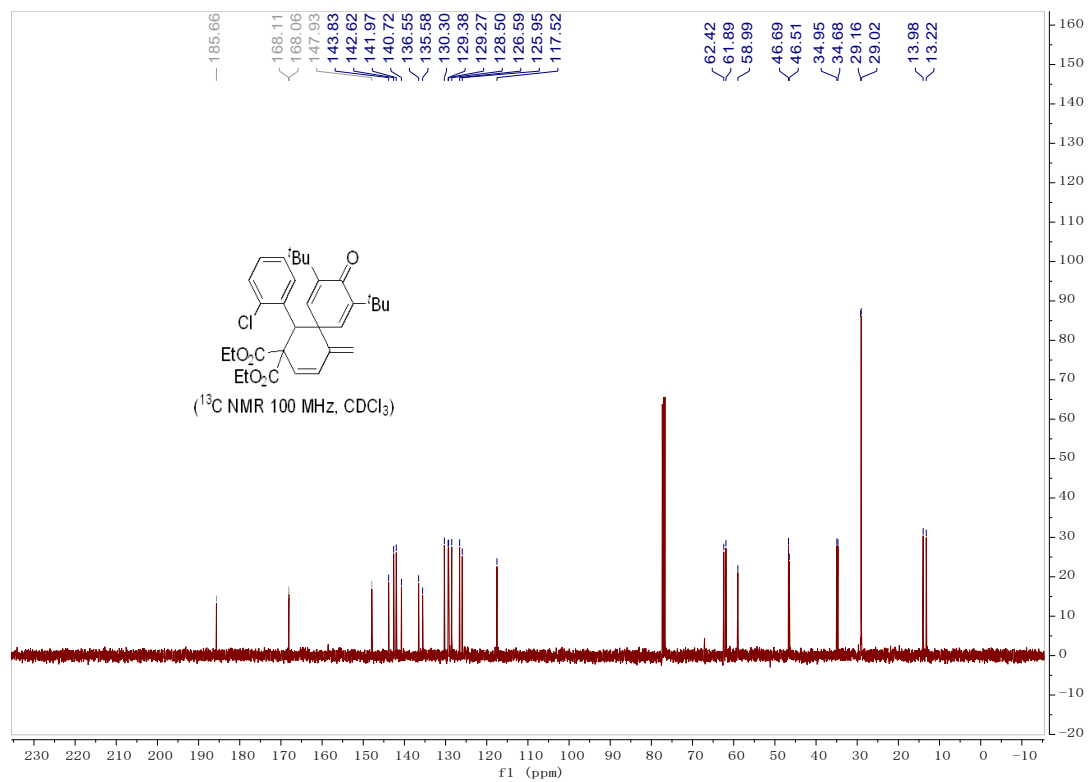

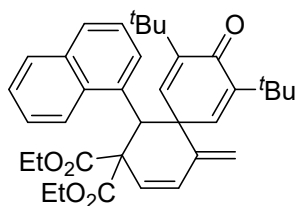

**diethyl 8,10-di-*tert*-butyl-5-methylene-1-(naphthalen-1-yl)-9-oxospiro[5.5]undeca-3,7,10-triene-2,2-dicarboxylate (4m):** Yield: 33%, a pale yellow solid, m.p. 181-183 °C; Eluent: PE/EA = 30/1. Yield was determined by  $^1\text{H}$  NMR using dibromomethane as an internal standard.  $^1\text{H}$  NMR (400 MHz,  $\text{CDCl}_3$ , TMS)  $\delta$  8.07 (d,  $J = 8.4$  Hz, 1H), 7.79 (d,  $J = 7.2$  Hz, 1H), 7.70 (d,  $J = 8.0$  Hz, 1H), 7.51 – 7.41 (m, 3H), 7.30 (t,  $J = 7.8$  Hz, 1H), 6.71 (d,  $J = 10.4$  Hz, 1H), 6.61 (d,  $J = 10.4$  Hz, 1H), 6.53 (d,  $J = 3.0$  Hz, 1H), 5.61 (d,  $J = 3.0$  Hz, 1H), 5.14 (s, 1H), 5.08 (s, 1H), 4.87 (s, 1H), 4.36 – 4.24 (m, 2H), 3.40 (dq,  $J = 10.8, 7.2$  Hz, 1H), 3.14 (dq,  $J = 10.8, 7.2$  Hz, 1H), 1.29 (t,  $J = 7.0$  Hz, 3H), 1.22 (s, 9H), 0.70 (s, 9H), 0.13 (t,  $J = 7.0$  Hz, 3H);  $^{13}\text{C}\{^1\text{H}\}$ -NMR (100 MHz,  $\text{CDCl}_3$ , TMS)  $\delta$  185.8, 168.6, 168.2, 147.3, 143.62, 143.58, 143.3, 140.9, 135.0, 133.5, 132.6, 130.5, 128.6, 127.9, 126.4, 126.2, 125.5, 125.4, 124.9, 124.2, 117.4, 62.5, 61.5, 59.5, 47.2, 45.0, 34.7, 34.6, 29.1, 28.7, 14.0, 12.5; IR (neat):  $\nu$  2957.74, 2925.13, 1865.11, 1735.72, 1714.61, 1657.46, 1634.78, 1363.73, 1220.85, 1119.68, 1097.38, 798.03  $\text{cm}^{-1}$ ; HRMS (DART) Calcd for  $\text{C}_{36}\text{H}_{43}\text{O}_5$   $[\text{M}+\text{H}]^+$  : 555.3105, found: 555.3106.

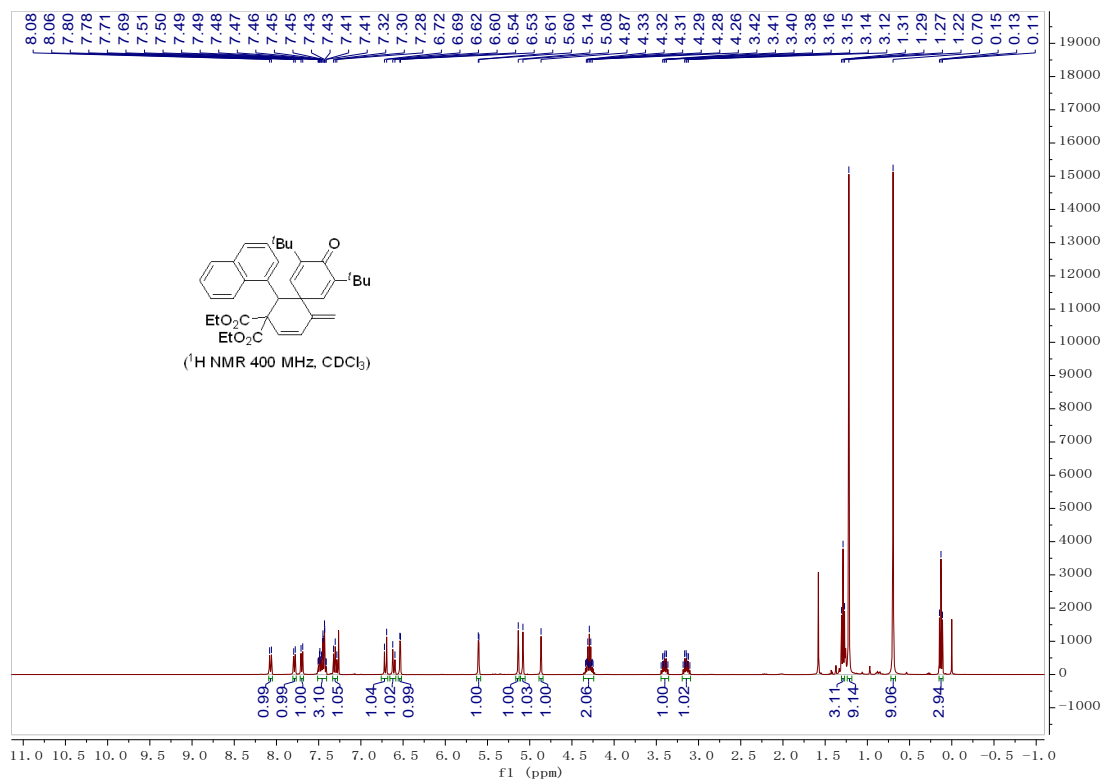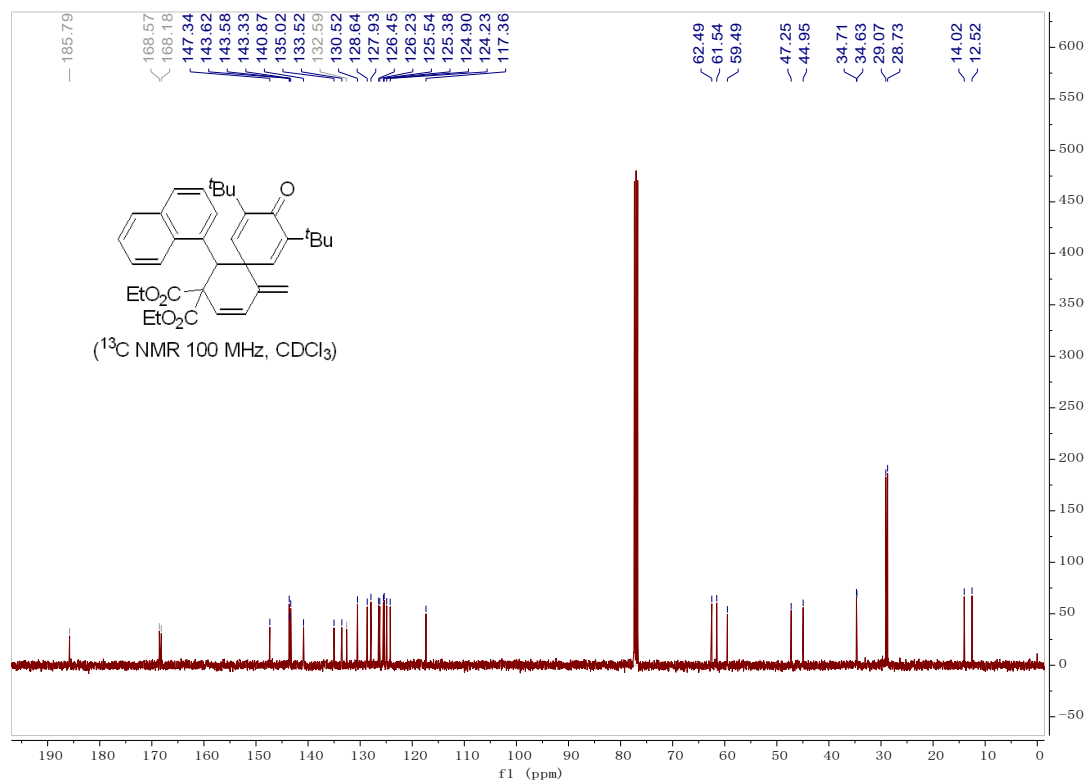

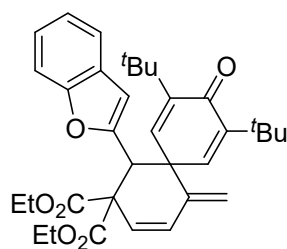

**diethyl 1-(benzofuran-2-yl)-8,10-di-tert-butyl-5-methylene-9-oxospiro[5.5]undeca-3,7,10-triene-2,2-dicarboxylate (4n):** Yield: 41%, a colorless oil; Eluent: PE/EA = 30/1. Yield was determined by  $^1\text{H}$  NMR using dibromomethane as an internal standard.  $^1\text{H}$  NMR (400 MHz,  $\text{CDCl}_3$ , TMS)  $\delta$  7.47 – 7.41 (m, 1H), 7.30 (d,  $J = 8.2$  Hz, 1H), 7.22 – 7.09 (m, 2H), 6.57 (d,  $J = 10.2$  Hz, 1H), 6.47 (s, 1H), 6.43 – 6.26 (m, 3H), 5.08 (s, 1H), 4.94 (s, 1H), 4.33 – 4.18 (m, 3H), 3.87 (dq,  $J = 10.6, 7.0$  Hz, 1H), 3.77 (dq,  $J = 10.6, 7.0$  Hz, 1H), 1.26 (t,  $J = 7.0$  Hz, 3H), 1.18 (s, 9H), 1.04 (s, 9H), 0.71 (t,  $J = 7.0$  Hz, 3H);  $^{13}\text{C}\{^1\text{H}\}$ -NMR (100 MHz,  $\text{CDCl}_3$ , TMS)  $\delta$  186.0, 168.3, 168.2, 155.0, 153.8, 147.4, 146.3, 141.8, 141.7, 141.4, 130.3, 128.0, 124.8, 124.0, 122.6, 120.8, 116.7, 110.7, 105.6, 62.5, 62.1, 59.1, 47.4, 46.6, 35.1, 34.7, 29.3, 29.0, 14.0, 13.3; IR (neat):  $\nu$  2998.18, 2958.05, 2865.11, 1728.71, 1714.38, 1660.28, 1638.88, 1454.34, 1364.47, 1252.77, 1189.47, 908.16, 752.15  $\text{cm}^{-1}$ ; HRMS (DART) Calcd for  $\text{C}_{34}\text{H}_{41}\text{O}_6$   $[\text{M}+\text{H}]^+$  : 545.2898, found: 545.2895.

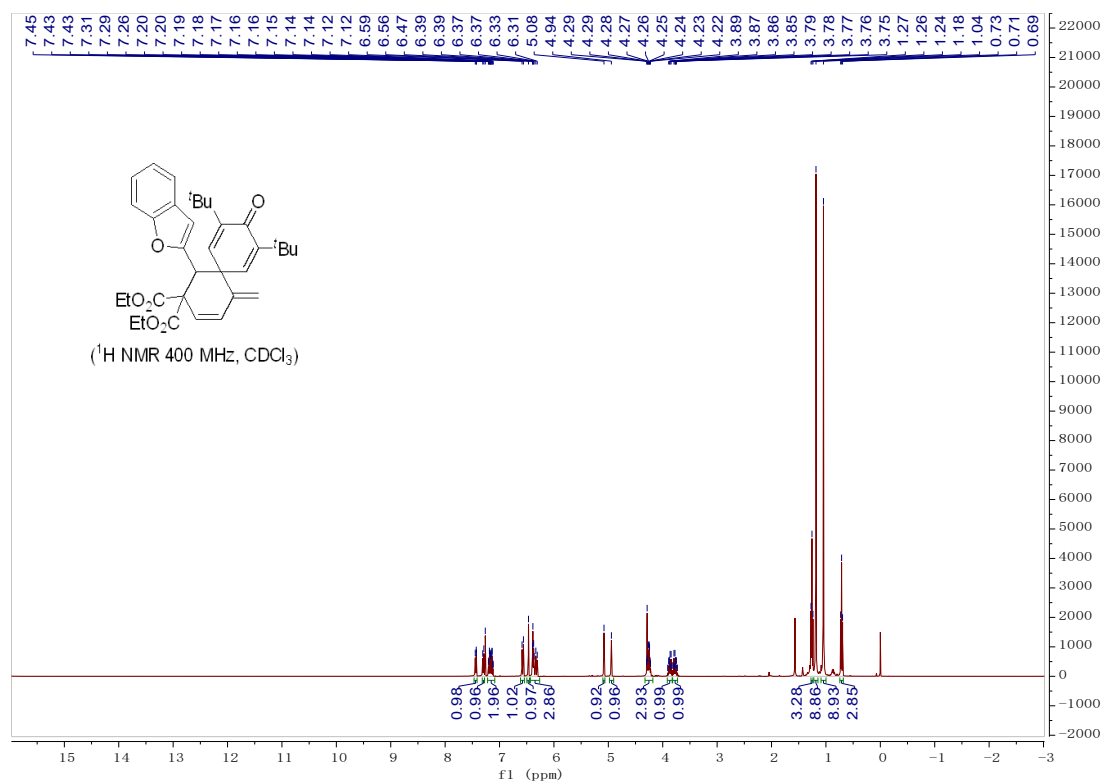

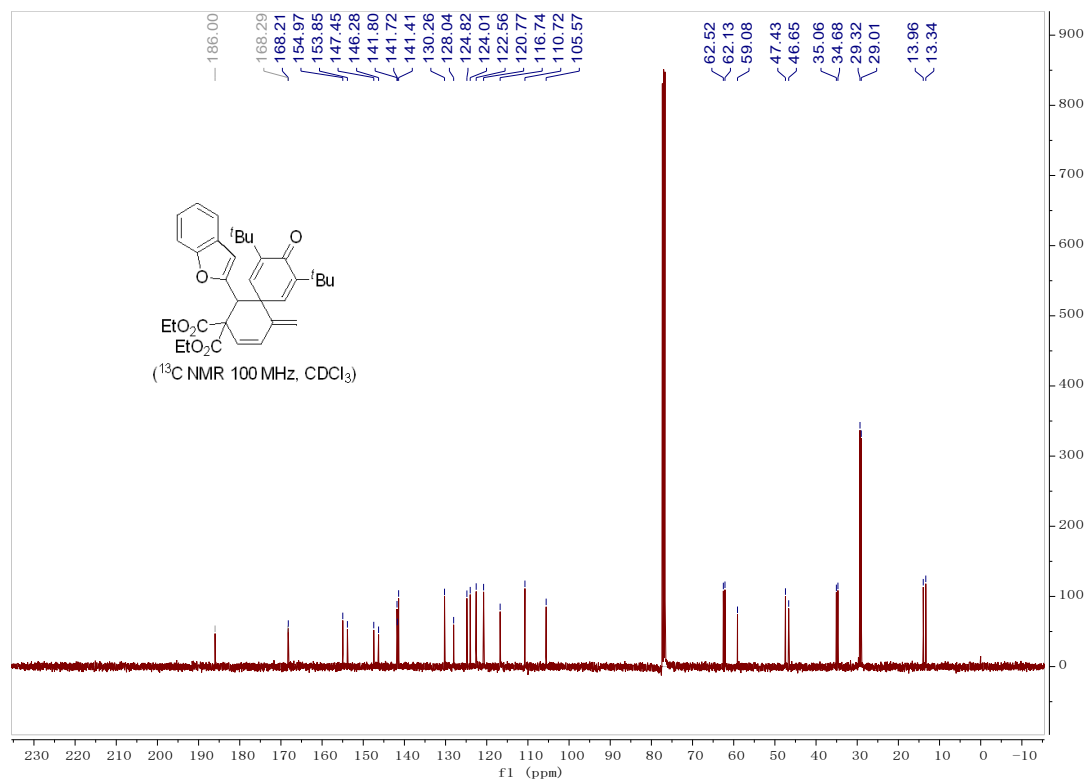

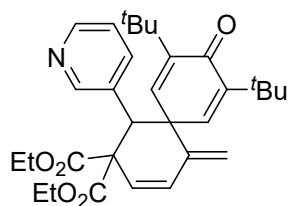

**diethyl 8,10-di-*tert*-butyl-5-methylene-9-oxo-1-(pyridin-3-yl)spiro[5.5]undeca-3,7,10-triene-2,2-dicarboxylate (40):** Yield: 35%, a colorless oil; Eluent: PE/EA = 30/1. Yield was determined by  $^1\text{H}$  NMR using dibromomethane as an internal standard. It contained some pentacyclic products  $^1\text{H}$  NMR (400 MHz,  $\text{CDCl}_3$ , TMS)  $\delta$  8.41 (d,  $J = 3.8$  Hz, 1H), 8.32 (s, 1H), 7.49 (d,  $J = 8.0$  Hz, 1H), 7.17 – 7.06 (m, 1H), 6.55 (d,  $J = 10.2$  Hz, 1H), 6.34 (d,  $J = 10.2$  Hz, 1H), 6.30 (d,  $J = 3.0$  Hz, 1H), 5.91 (d,  $J = 3.0$  Hz, 1H), 5.08 (s, 1H), 4.87 (s, 1H), 4.23 – 4.15 (m, 2H), 3.91 (s, 1H), 3.77 – 3.69 (m, 1H), 3.65 – 3.57 (m, 1H), 1.21 (t,  $J = 7.0$  Hz, 3H), 1.07 (s, 9H), 1.03 (s, 9H), 0.78 (t,  $J = 7.0$  Hz, 3H);  $^{13}\text{C}\{^1\text{H}\}$ -NMR (100 MHz,  $\text{CDCl}_3$ , TMS)  $\delta$  185.7, 168.03, 168.00, 148.8, 147.9, 144.8, 142.7, 142.4, 140.7, 134.4, 130.2, 125.7, 122.6, 117.8, 62.5, 62.0, 59.1, 46.5, 35.1, 34.7, 29.4, 29.0, 14.0, 13.4; IR (neat):  $\nu$  2957.85, 2906.54, 2864.49, 1734.69, 1659.04, 1637.82, 1389.13, 1116.72, 1061.02, 948.10, 910.03, 30.88  $\text{cm}^{-1}$ ; HRMS (ESI-TOF) Calcd for  $\text{C}_{31}\text{H}_{40}\text{NO}_5$   $[\text{M}+\text{H}]^+$  : 506.2901, found: 506.2896.

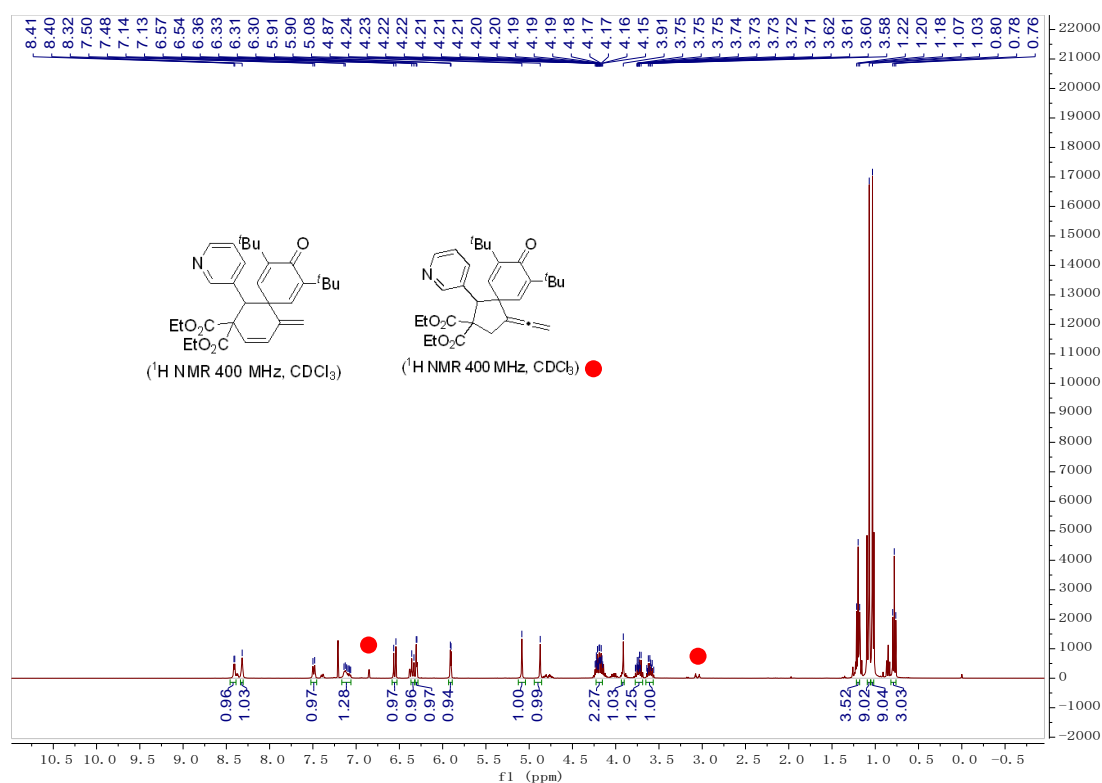

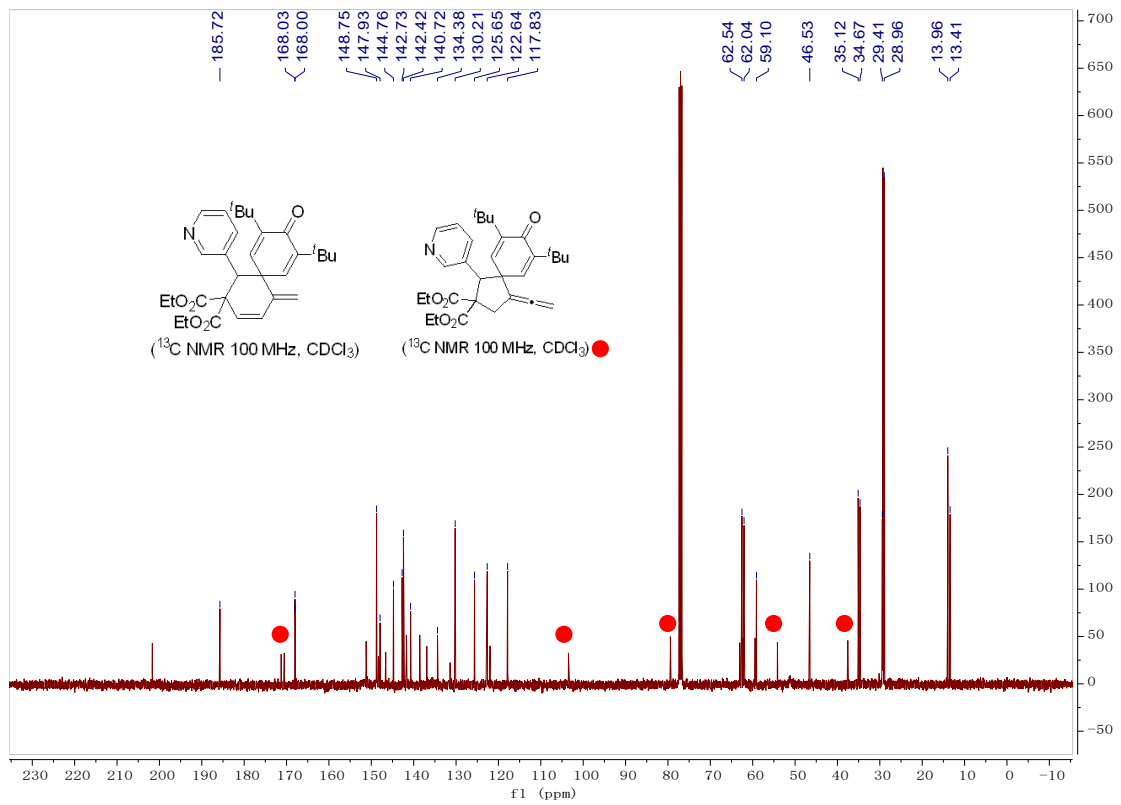



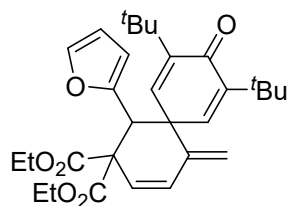

**diethyl 8,10-di-*tert*-butyl-1-(furan-2-yl)-5-methylene-9-oxospiro[5.5]undeca-3,7,10-triene-2,2-dicarboxylate (4p):** Yield: 55%, a colorless oil; Eluent: PE/EA = 30/1. Yield was determined by  $^1\text{H}$  NMR using dibromomethane as an internal standard. It contained some pentacyclic products  $^1\text{H}$  NMR (400 MHz,  $\text{CDCl}_3$ , TMS)  $\delta$  7.17 – 7.14 (m, 1H), 6.46 (d,  $J = 10.2$  Hz, 1H), 6.27 (d,  $J = 3.0$  Hz, 1H), 6.23 (d,  $J = 10.2$  Hz, 1H), 6.16 – 6.13 (m, 1H), 6.07 (d,  $J = 3.0$  Hz, 1H), 5.98 – 5.96 (m, 1H), 4.98 (s, 1H), 4.84 (s, 1H), 4.21 – 4.16 (m, 2H), 4.07 (s, 1H), 3.86 – 3.81 (m, 2H), 1.19 (t,  $J = 7.0$  Hz, 3H), 1.09 (s, 9H), 1.07 (s, 9H), 0.89 (t,  $J = 7.0$  Hz, 3H);  $^{13}\text{C}$   $\{^1\text{H}\}$ -NMR (100 MHz,  $\text{CDCl}_3$ , TMS)  $\delta$  186.0, 168.23, 168.16, 152.1, 147.4, 145.1, 142.4, 141.8, 140.8, 130.0, 124.6, 116.6, 110.4, 108.6, 62.4, 62.0, 58.8, 47.0, 46.8, 35.0, 34.7, 29.3, 29.1, 13.9, 13.7; IR (neat):  $\nu$  2957.39, 2903.74, 2864.49, 1731.65, 1659.48, 1637.88, 1499.21, 1388.81, 1366.02, 1255.67, 1189.83, 1034.24, 732.83  $\text{cm}^{-1}$ ; HRMS (DART) Calcd for  $\text{C}_{30}\text{H}_{39}\text{O}_6$   $[\text{M}+\text{H}]^+$  : 495.2741, found: 495.2739.

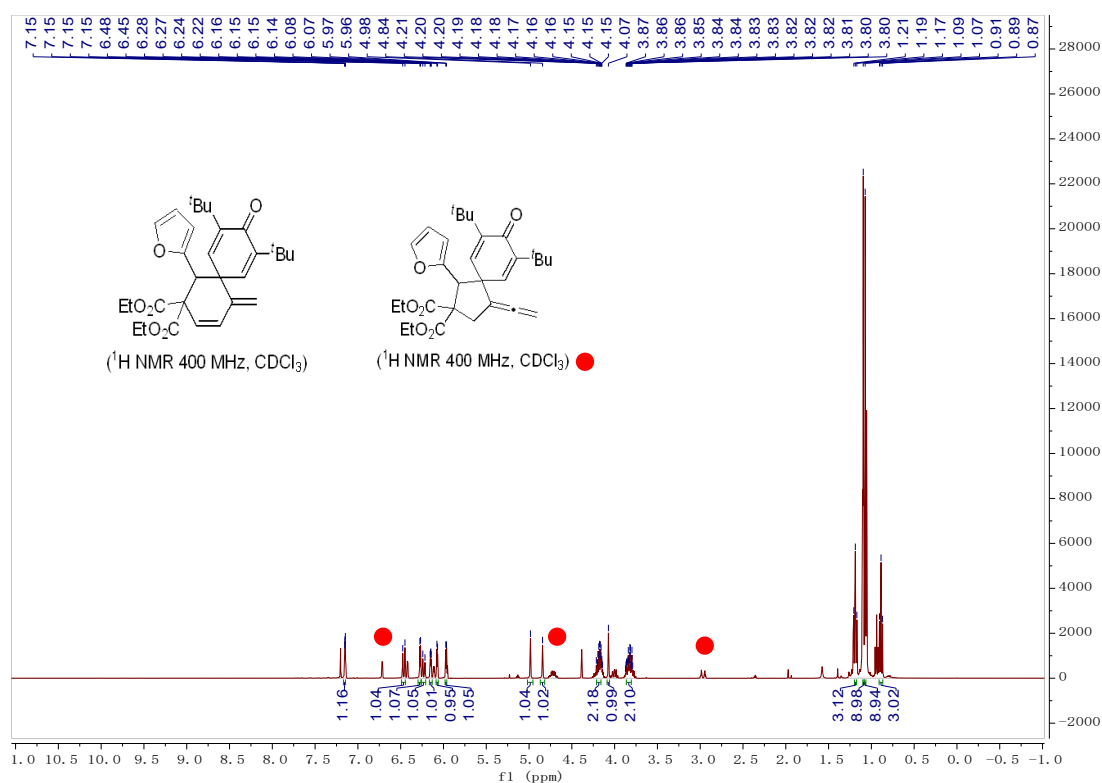

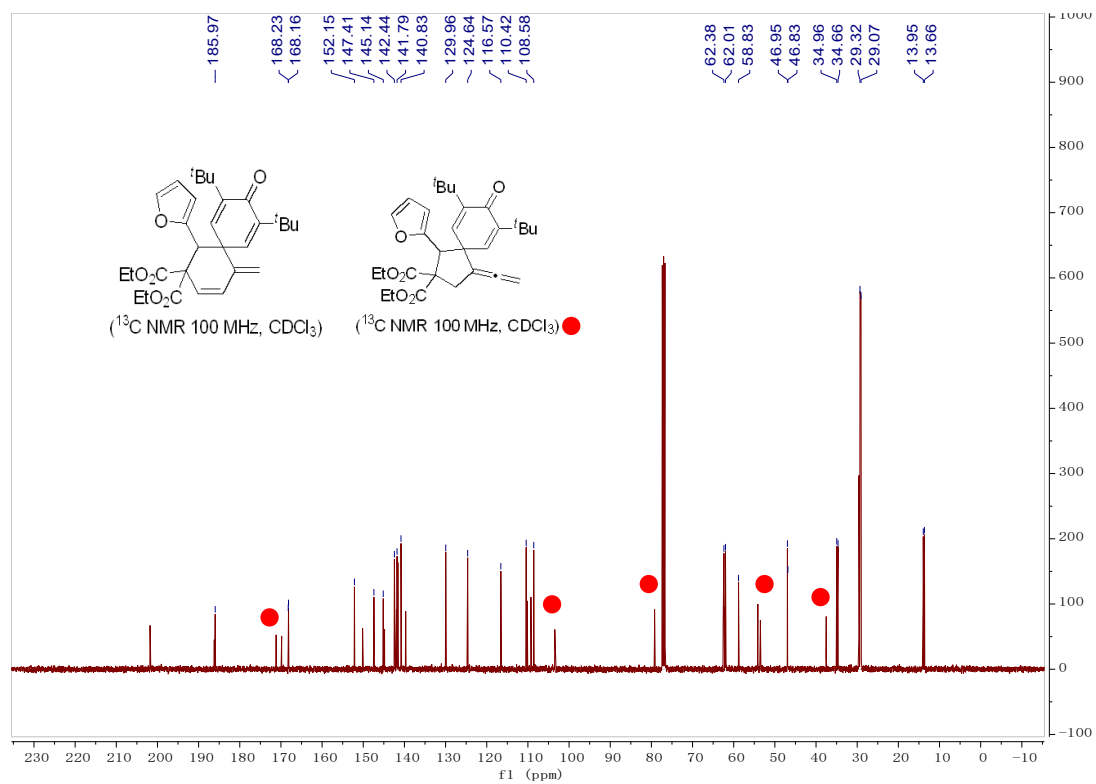

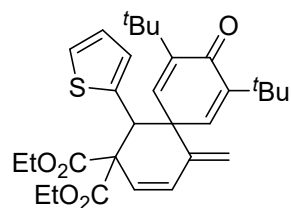

**diethyl 8,10-di-*tert*-butyl-5-methylene-9-oxo-1-(thiophen-2-yl)spiro[5.5]undeca-3,7,10-triene-2,2-dicarboxylate (4p):** Yield: 60%, a pale yellow solid, m.p. 150-152 °C; Eluent: PE/EA = 30/1. Yield was determined by  $^1\text{H}$  NMR using dibromomethane as an internal standard.  $^1\text{H}$  NMR (400 MHz,  $\text{CDCl}_3$ , TMS)  $\delta$  7.04 (d,  $J = 4.8$  Hz, 1H), 6.81 – 6.74 (m, 2H), 6.52 (d,  $J = 10.2$  Hz, 1H), 6.31 (d,  $J = 10.2$  Hz, 1H), 6.27 (d,  $J = 3.0$  Hz, 1H), 6.05 (d,  $J = 3.0$  Hz, 1H), 5.07 (s, 1H), 4.88 (s, 1H), 4.24 – 4.13 (m, 3H), 3.79 (dq,  $J = 10.8, 7.2$  Hz, 1H), 3.69 – 3.60 (m, 1H), 1.20 (t,  $J = 7.0$  Hz, 3H), 1.09 (s, 9H), 1.06 (s, 9H), 0.87 (t,  $J = 7.0$  Hz, 3H);  $^{13}\text{C}\{^1\text{H}\}$ -NMR (100 MHz,  $\text{CDCl}_3$ , TMS)  $\delta$  186.0, 168.1, 167.9, 147.6, 144.4, 143.5, 142.1, 141.3, 139.9, 130.0, 127.4, 126.1, 124.9, 124.6, 117.6, 62.4, 62.0, 59.8, 48.9, 47.1, 35.0, 34.7, 29.3, 29.0, 14.0, 13.5; IR (neat):  $\nu$  3006.01, 2961.66, 2865.11, 1737.93, 1711.32, 1659.14, 1359.25, 1220.16, 1190.00, 10927, 1033.45, 904.12, 709.91  $\text{cm}^{-1}$ ; HRMS (DART) Calcd for  $\text{C}_{30}\text{H}_{39}\text{O}_5\text{S}$   $[\text{M}+\text{H}]^+$  : 511.2513, found: 511.2513.

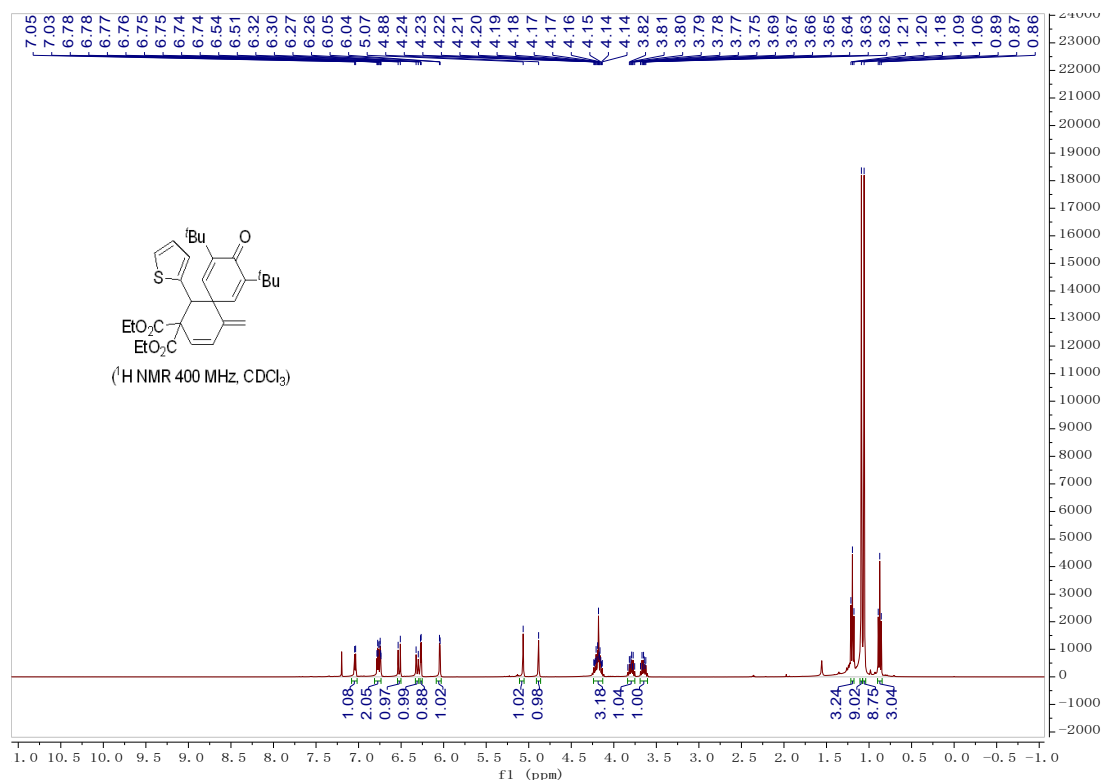

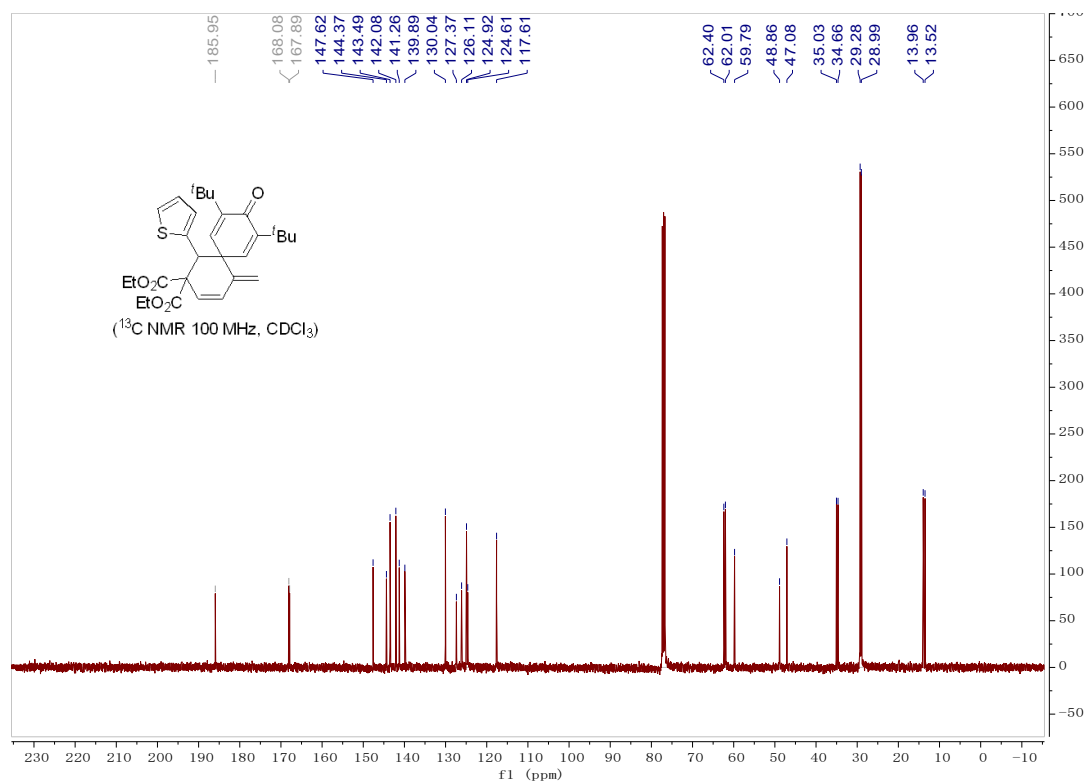

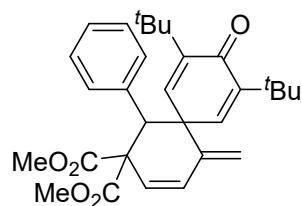

**dimethyl 8,10-di-*tert*-butyl-5-methylene-9-oxo-1-phenylspiro[5.5]undeca-3,7,10-triene-2,2-dicarboxylate (4r):** Yield: 27%, a colorless oil; Eluent: PE/EA = 30/1. Yield was determined by  $^1\text{H}$  NMR using dibromomethane as an internal standard.  $^1\text{H}$  NMR (400 MHz,  $\text{CDCl}_3$ , TMS)  $\delta$  7.24 – 7.03 (m, 5H), 6.62 (d,  $J = 10.2$  Hz, 1H), 6.44 (d,  $J = 10.2$  Hz, 1H), 6.38 (d,  $J = 3.0$  Hz, 1H), 5.95 (d,  $J = 3.0$  Hz, 1H), 5.12 (s, 1H), 4.92 (s, 1H), 3.91 (s, 1H), 3.80 (s, 3H), 3.16 (s, 3H), 1.17 (s, 9H), 1.07 (s, 9H);  $^{13}\text{C}\{^1\text{H}\}$ -NMR (100 MHz,  $\text{CDCl}_3$ , TMS)  $\delta$  185.9, 168.9, 168.7, 147.2, 144.2, 144.1, 142.7, 141.1, 138.5, 130.3, 127.9, 127.5, 125.5, 117.4, 59.3, 54.3, 53.5, 52.5, 46.6, 35.0, 34.6, 29.2, 29.0; IR (neat):  $\nu$  3000.79, 2954.59, 2862.51, 1740.97, 1714.69, 1658.50, 1635.53, 1454.86, 1433.05, 1364.34, 1251.39, 1179.72, 906.92  $\text{cm}^{-1}$ ; HRMS (DART) Calcd for  $\text{C}_{30}\text{H}_{37}\text{O}_5$   $[\text{M}+\text{H}]^+$  : 477.2636, found: 477.2632.

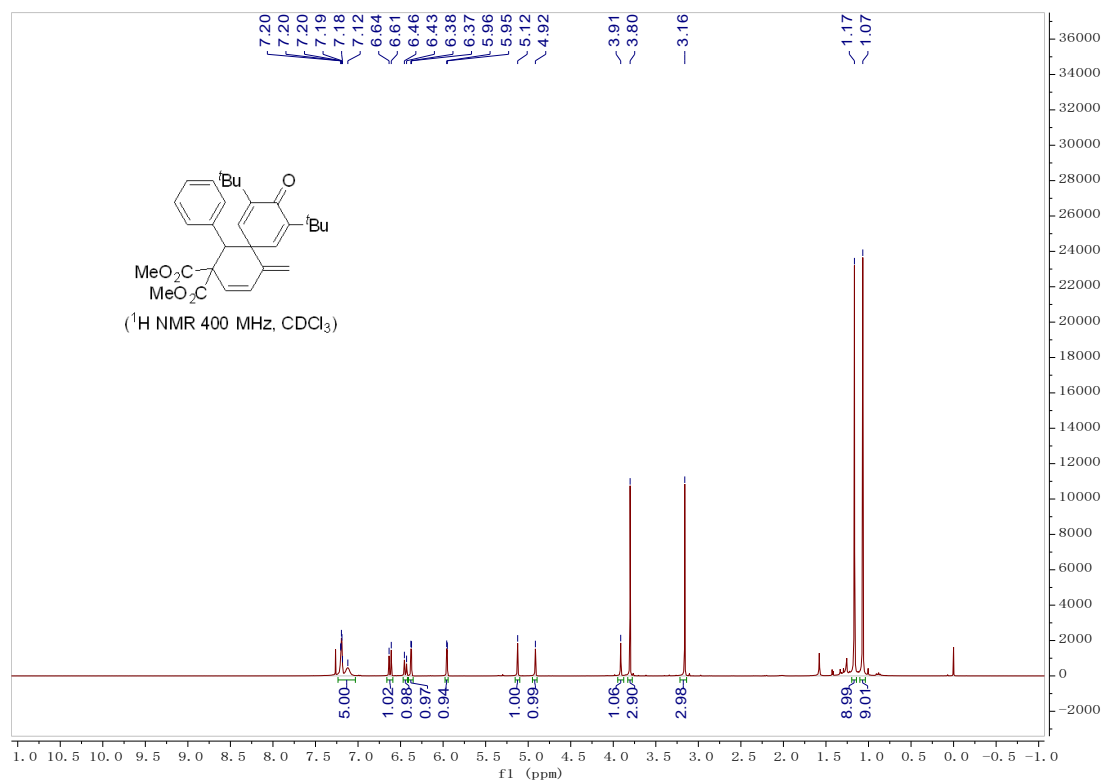

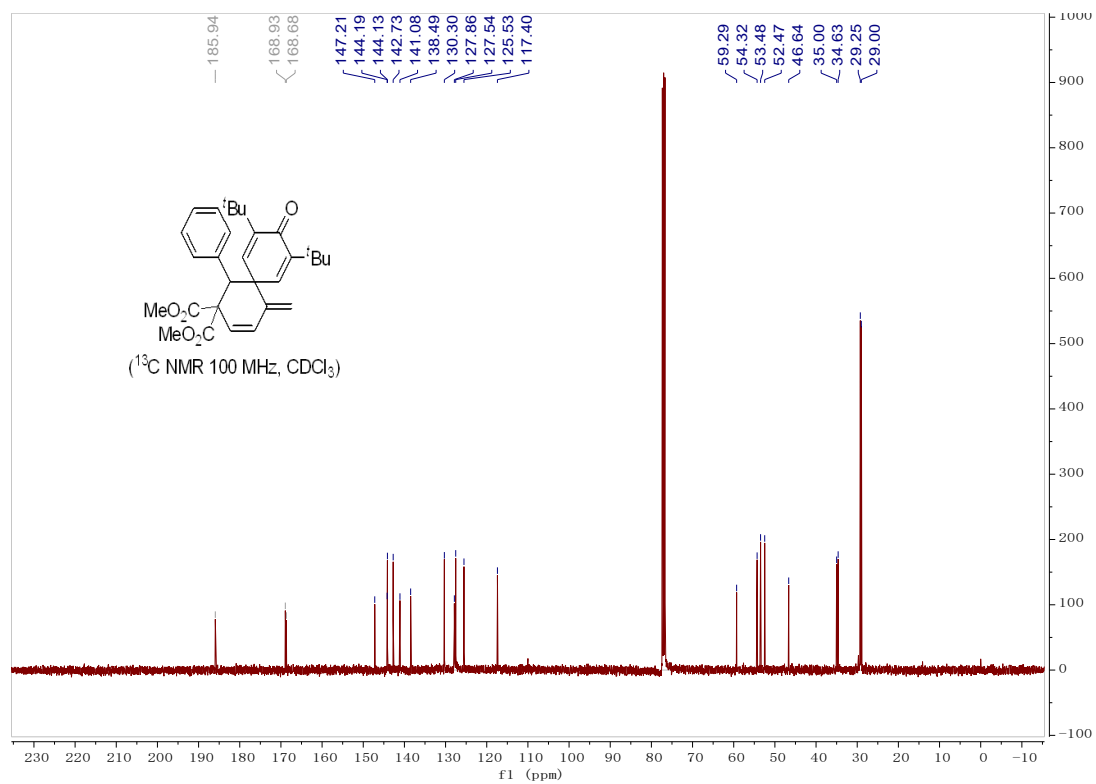

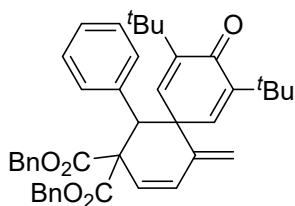

**dibenzyl 8,10-di-tert-butyl-5-methylene-9-oxo-1-phenylspiro[5.5]undeca-3,7,10-triene-2,2-dicarboxylate (4s):** Yield: 50%, a colorless oil; Eluent: PE/EA = 30/1. Yield was determined by  $^1\text{H}$  NMR using dibromomethane as an internal standard.  $^1\text{H}$  NMR (400 MHz,  $\text{CDCl}_3$ , TMS)  $\delta$  7.31 – 7.12 (m, 13H), 6.89 (d,  $J = 8.0$  Hz, 2H), 6.63 (d,  $J = 10.2$  Hz, 1H), 6.48 (d,  $J = 10.2$  Hz, 1H), 6.40 (d,  $J = 3.0$  Hz, 1H), 5.93 (d,  $J = 3.0$  Hz, 1H), 5.14 (s, 2H), 5.11 (s, 1H), 4.90 (s, 1H), 4.57 (d,  $J = 12.2$  Hz, 1H), 4.30 (d,  $J = 12.2$  Hz, 1H), 3.94 (s, 1H), 1.13 (s, 9H), 1.06 (s, 9H);  $^{13}\text{C}\{^1\text{H}\}$ -NMR (100 MHz,  $\text{CDCl}_3$ , TMS)  $\delta$  186.0, 168.01, 168.00, 147.2, 144.1, 144.0, 143.1, 141.1, 138.4, 135.1, 134.5, 130.6, 128.6, 128.43, 128.36, 128.23, 128.20, 128.1, 127.9, 127.5, 125.4, 117.4, 67.9, 67.4, 59.5, 53.8, 46.7, 35.0, 34.6, 29.3, 29.0; IR (neat):  $\nu$  3003.40, 2959.05, 2865.11, 1711.81, 1659.34, 1637.01, 1358.94, 1220.12, 1163.54, 1131.12, 1090.95, 907.46, 698.96  $\text{cm}^{-1}$ ; HRMS (ESI-TOF) Calcd for  $\text{C}_{42}\text{H}_{45}\text{O}_5$   $[\text{M}+\text{H}]^+$  : 629.3262, found: 629.3263.

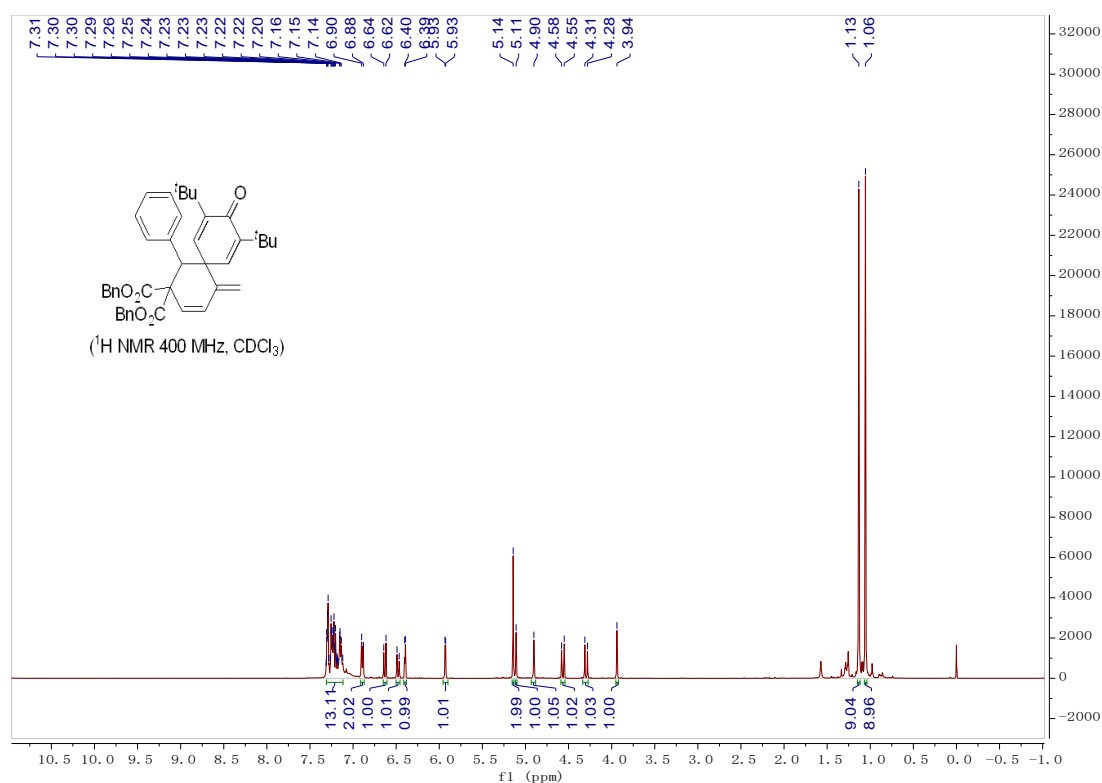

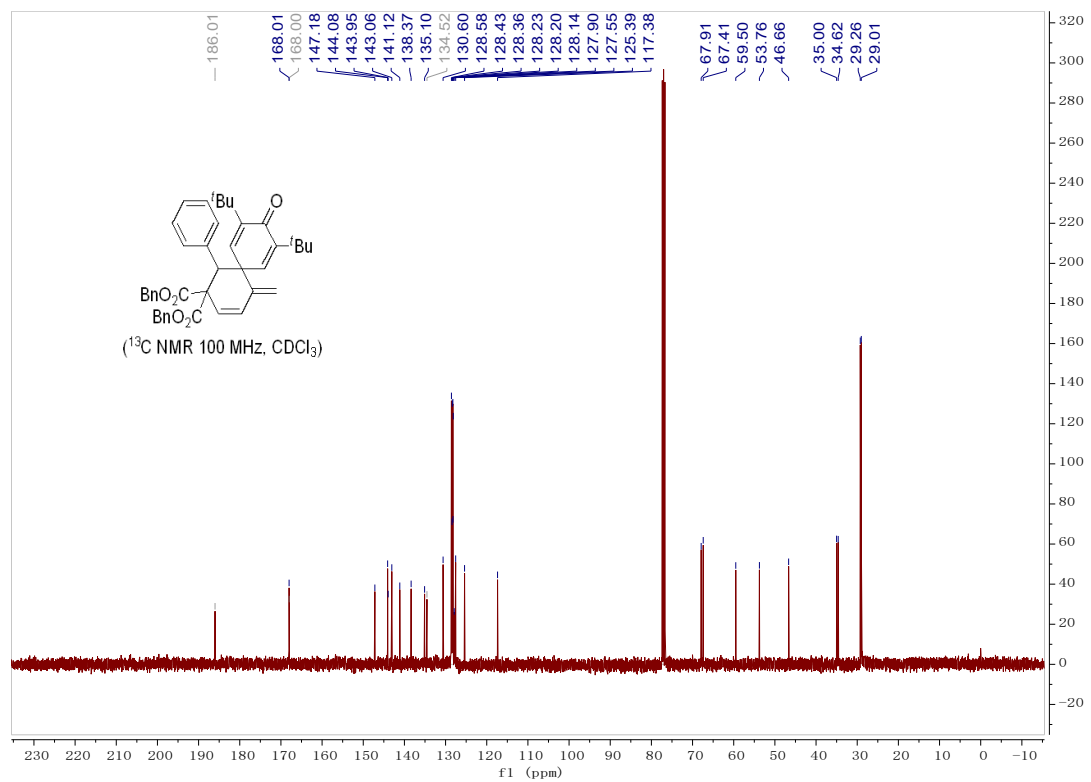



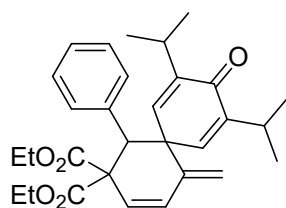

**diethyl 8,10-diisopropyl-5-methylene-9-oxo-1-phenylspiro[5.5]undeca-3,7,10-triene-2,2-dicarboxylate (4t):** Yield: 50%, a colorless oil; Eluent: PE/EA = 30/1. Yield was determined by  $^1\text{H}$  NMR using dibromomethane as an internal standard.  $^1\text{H}$  NMR (400 MHz,  $\text{CDCl}_3$ , TMS)  $\delta$  7.24 – 7.05 (m, 5H), 6.62 (d,  $J = 10.2$  Hz, 1H), 6.47 (d,  $J = 10.2$  Hz, 1H), 6.40 (d,  $J = 3.8$  Hz, 1H), 5.92 (d,  $J = 3.8$  Hz, 1H), 5.07 (s, 1H), 4.86 (s, 1H), 4.31 – 4.22 (m, 2H), 3.97 (s, 1H), 3.70 (dq,  $J = 10.8, 7.2$  Hz, 1H), 3.55 (dq,  $J = 10.8, 7.2$  Hz, 1H), 3.04 – 2.90 (m, 2H), 1.28 (t,  $J = 7.0$  Hz, 3H), 1.04 (d,  $J = 6.8$  Hz, 3H), 0.95 (d,  $J = 6.8$  Hz, 3H), 0.90 – 0.85 (m, 6H), 0.78 (t,  $J = 7.0$  Hz, 3H);  $^{13}\text{C}\{^1\text{H}\}$ -NMR (100 MHz,  $\text{CDCl}_3$ , TMS)  $\delta$  184.7, 168.5, 168.2, 145.4, 144.3, 143.3, 141.6, 140.7, 138.5, 130.1, 127.8, 127.6, 125.8, 117.1, 62.4, 61.8, 59.2, 53.1, 46.8, 26.6, 26.3, 21.81, 21.76, 21.4, 21.1, 14.0, 13.3; IR (neat):  $\nu$  2960.15, 2930.34, 2870.33, 1735.83, 1714.46, 1637.78, 1463.74, 1233.78, 1220.32, 1182.55, 1083.45, 1058.36  $\text{cm}^{-1}$ ; HRMS (ESI-TOF) Calcd for  $\text{C}_{30}\text{H}_{37}\text{O}_5$   $[\text{M}+\text{H}]^+$  : 477.2636, found: 477.2634.

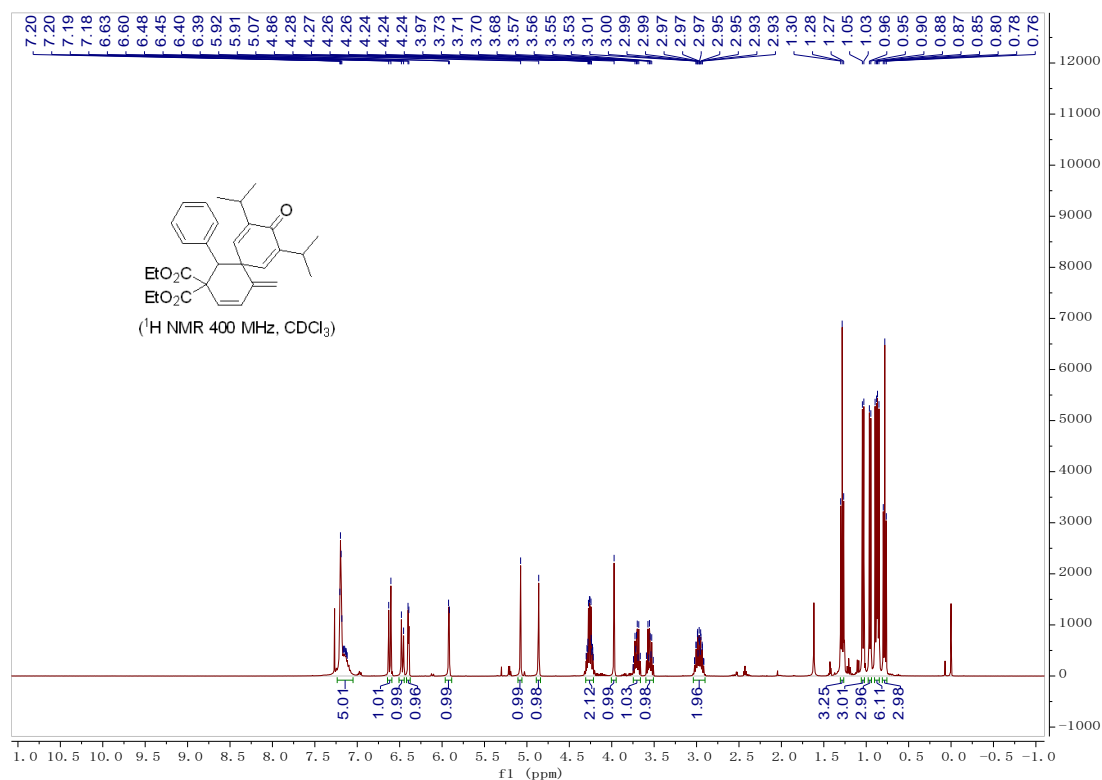

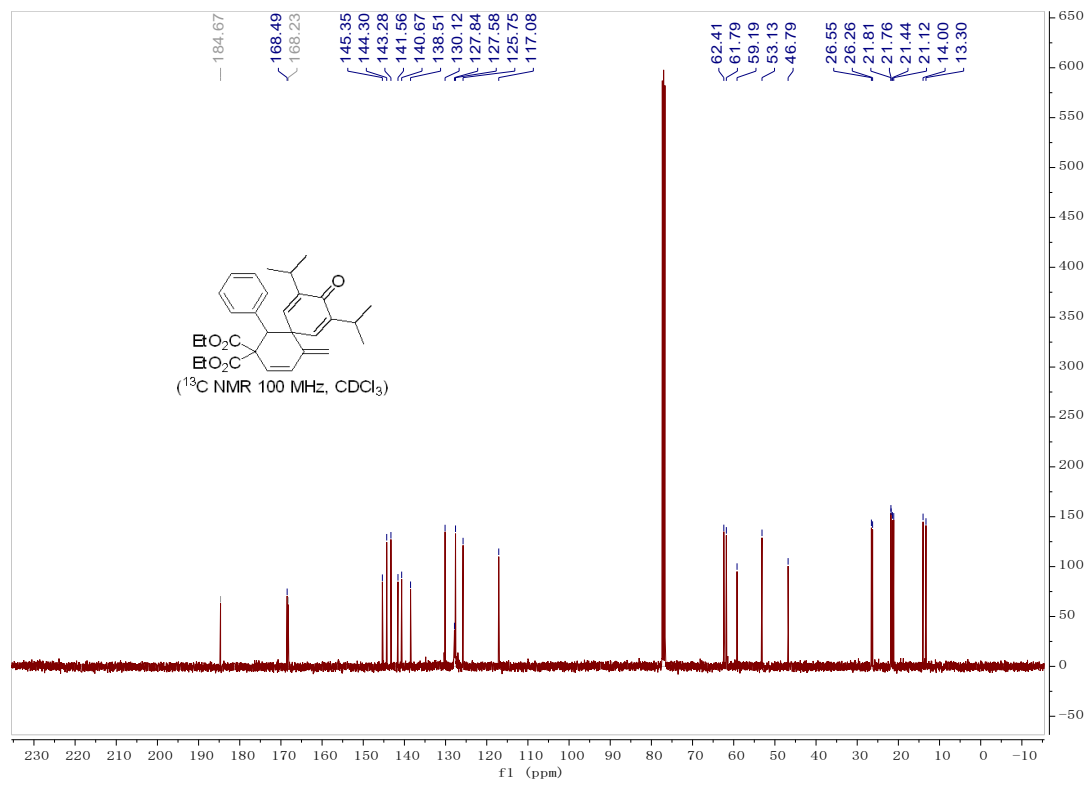

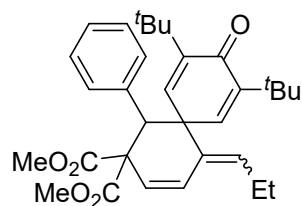

**dimethyl 8,10-di-*tert*-butyl-9-oxo-1-phenyl-5-propylidene-2,2-dicarboxylate (4u):** Yield: 44%, a colorless oil; Eluent: PE/EA = 30/1. Yield was determined by  $^1\text{H}$  NMR using dibromomethane as an internal standard.  $^1\text{H}$  NMR (400 MHz,  $\text{CDCl}_3$ , TMS)  $\delta$  7.18 (s, 3H), 7.10 (s, 2H), 6.88 (d,  $J = 10.4$  Hz, 1H), 6.43 – 6.37 (m, 2H), 5.94 (d,  $J = 3.0$  Hz, 1H), 5.28 (t,  $J = 7.4$  Hz, 1H), 3.88 (s, 1H), 3.79 (s, 3H), 3.15 (s, 3H), 2.29 – 2.12 (m, 2H), 1.16 (s, 9H), 1.07 (s, 9H), 0.96 (t,  $J = 7.4$  Hz, 3H);  $^{13}\text{C}\{^1\text{H}\}$ -NMR (100 MHz,  $\text{CDCl}_3$ , TMS)  $\delta$  186.1, 169.0, 168.9, 146.8, 144.9, 143.8, 143.4, 138.7, 133.9, 131.0, 127.7, 127.4, 125.2, 124.7, 59.4, 54.6, 53.4, 52.4, 46.8, 35.0, 34.6, 29.3, 29.0, 28.7, 20.9, 14.1; IR (neat):  $\nu$  300.79, 2954.49, 2865.11, 1740.73, 1715.78, 1656.69, 1634.65, 1234.12, 1270, 1200.68, 1177.94, 1057.16, 914.75  $\text{cm}^{-1}$ ; HRMS (DART) Calcd for  $\text{C}_{32}\text{H}_{41}\text{O}_5$   $[\text{M}+\text{H}]^+$  : 505.2949, found: 505.2948.

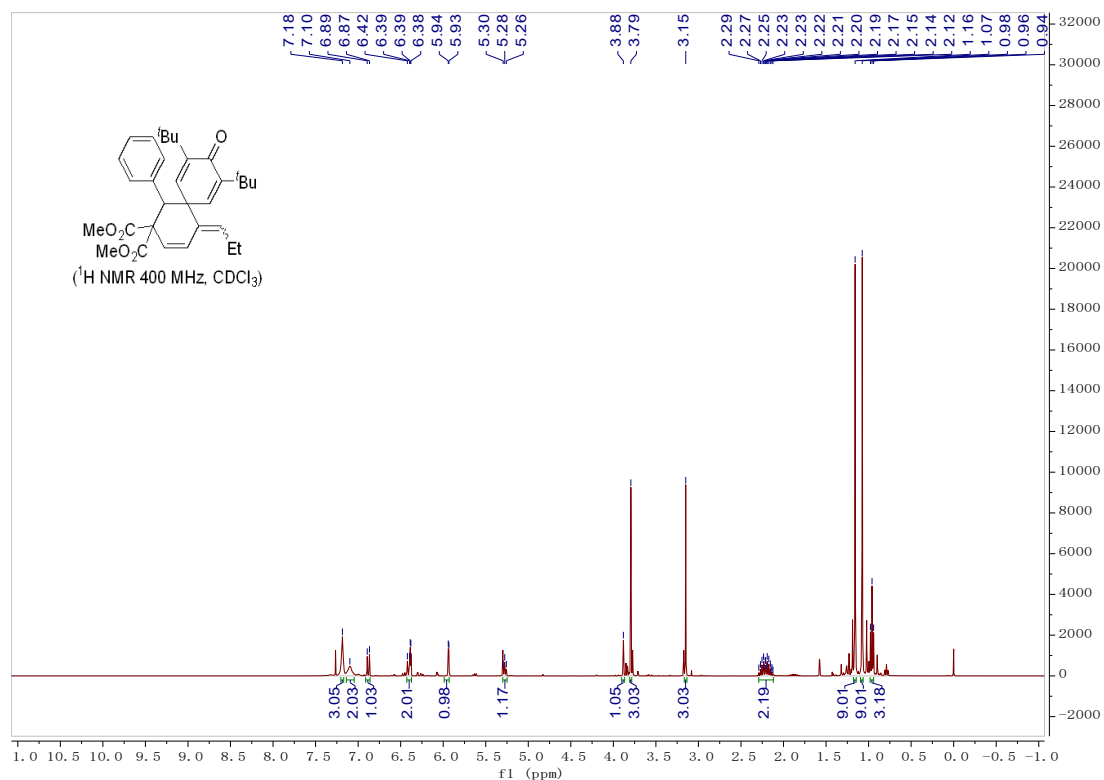

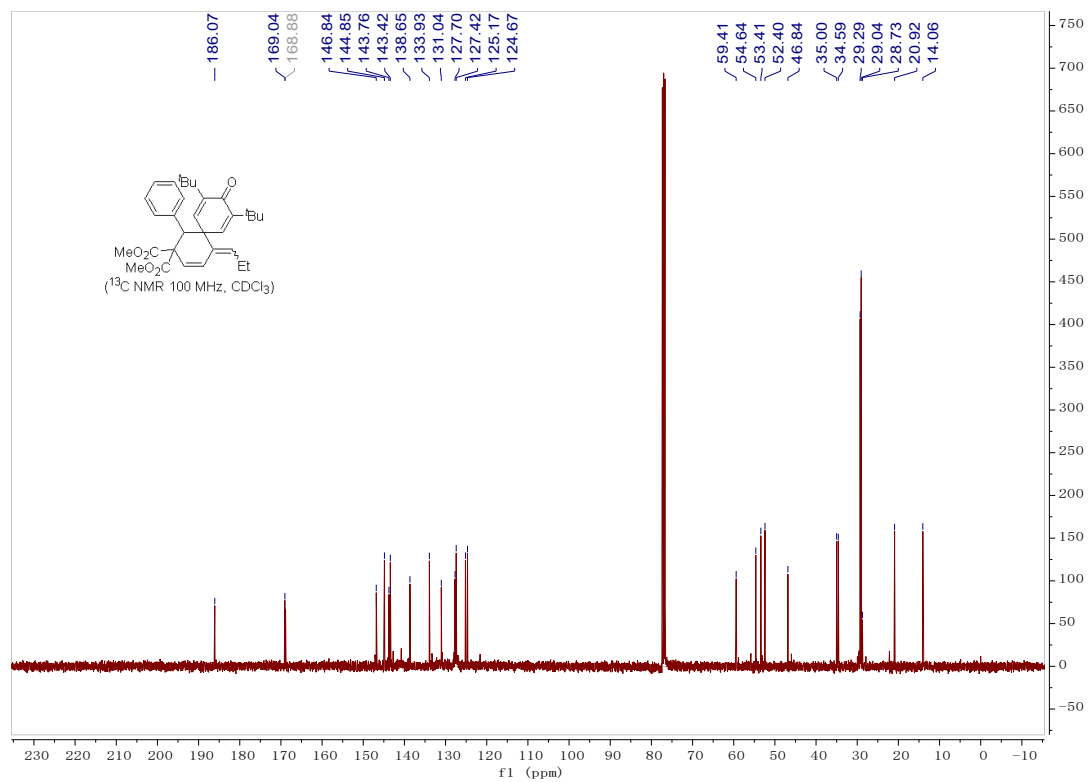

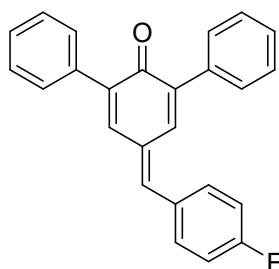

**5'-(4-fluorobenzylidene)-[1,1':3',1''-terphenyl]-2'(5'*H*)-one (1z):** Yield: 0.334 g, 95%, a yellow solid, m.p. 196-198 °C; Eluent: PE/DCM = 20/1. <sup>1</sup>H NMR (400 MHz, CDCl<sub>3</sub>, TMS) δ 7.78 (d, *J* = 2.4 Hz, 1H), 7.61 – 7.49 (m, 6H), 7.47 – 7.32 (m, 8H), 7.16 (t, *J* = 8.6 Hz, 2H); <sup>13</sup>C{<sup>1</sup>H}-NMR (100 MHz, CDCl<sub>3</sub>, TMS) δ 183.8, 163.6 (d, *J* = 253.0 Hz), 144.5, 140.8, 139.6, 139.0, 136.7, 136.3, 132.7 (d, *J* = 8.4 Hz), 132.0, 131.68, 131.66, 131.6 (d, *J* = 3.2 Hz), 129.3, 129.2, 128.2, 128.12, 128.09, 116.4 (d, *J* = 22.0 Hz); <sup>19</sup>F NMR (376 MHz, CDCl<sub>3</sub>) δ -108.93; IR (neat): ν 3055.59, 3032.10, 2956.44, 2852.07, 1712.58, 1504.64, 1461.68, 1225.86, 1157.99, 780.00, 697.62 cm<sup>-1</sup>; HRMS (DART) Calcd for C<sub>25</sub>H<sub>18</sub>OF [M+H]<sup>+</sup> : 353.1336, found: 353.1334.

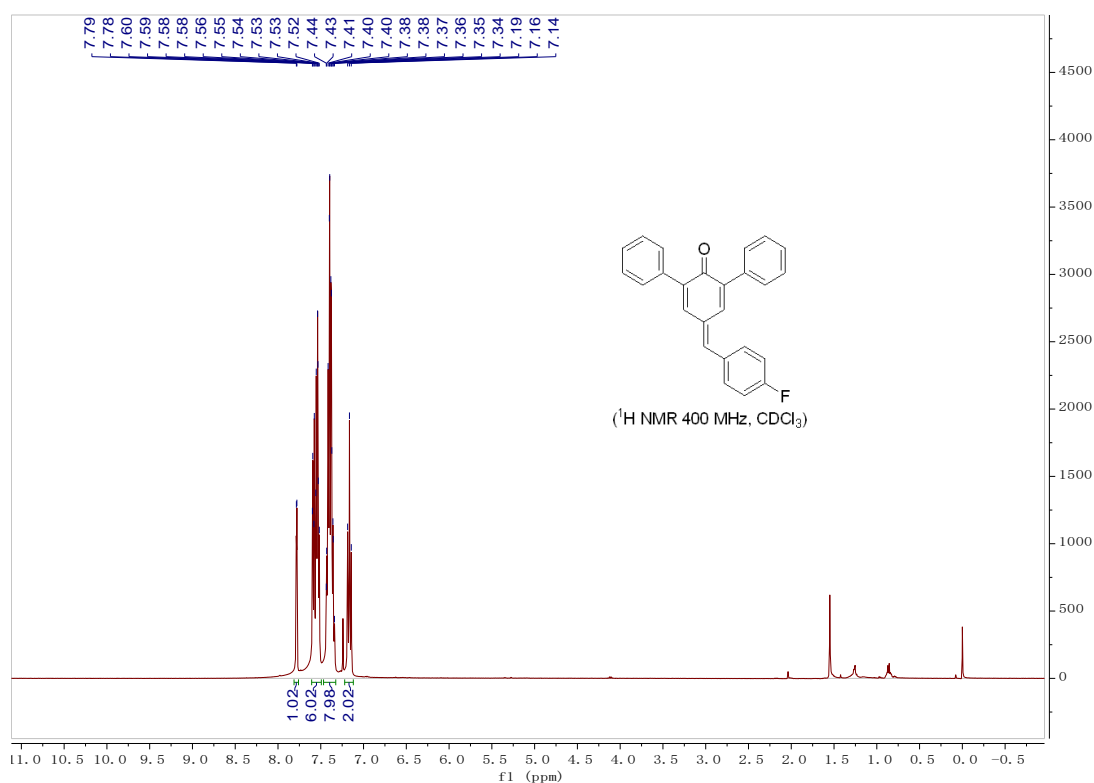

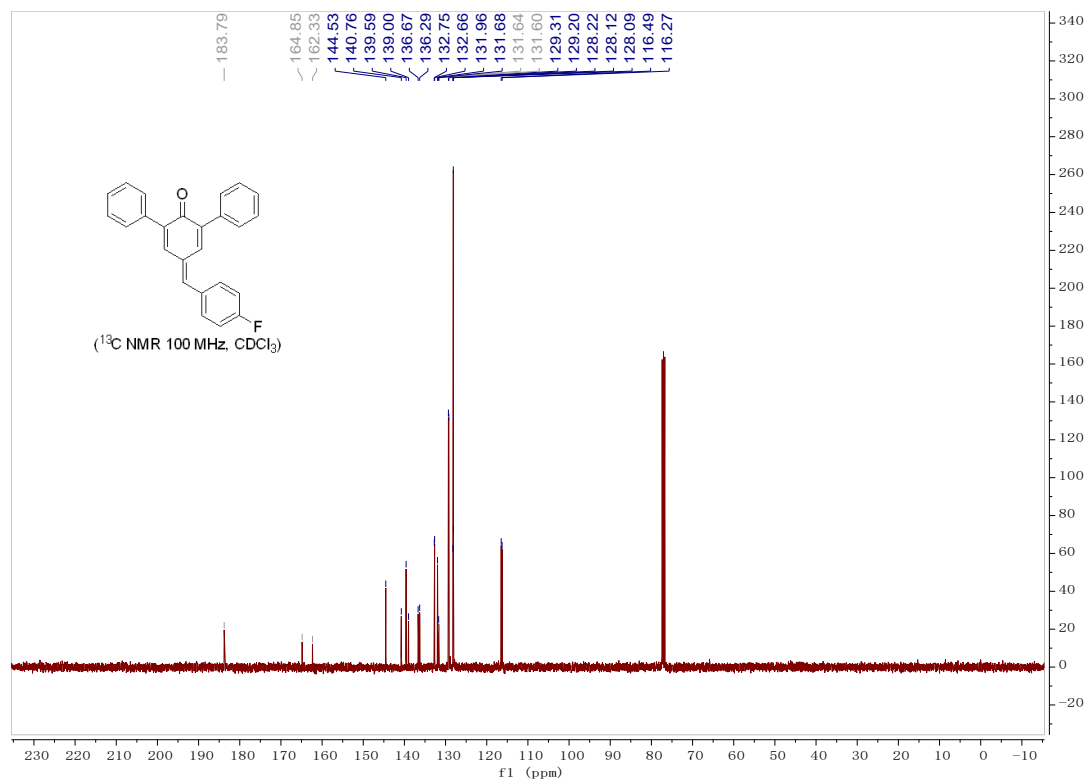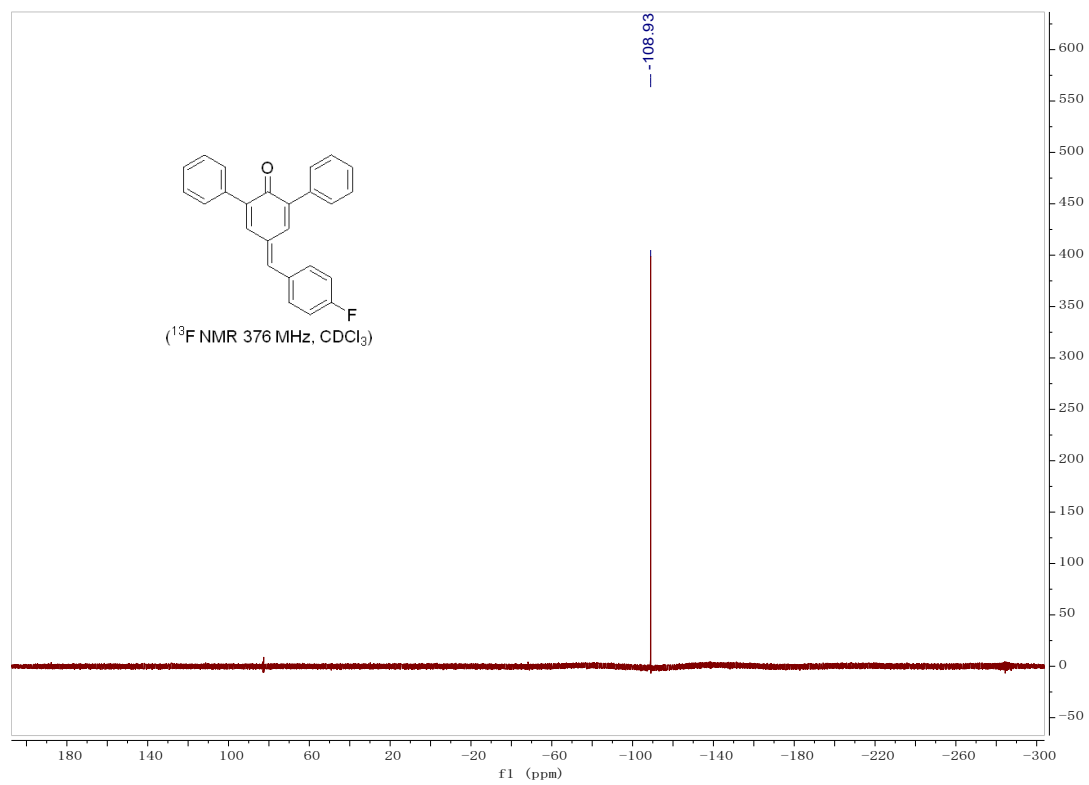

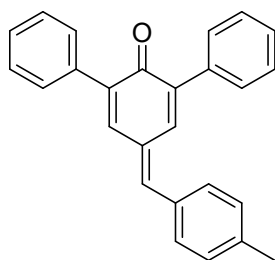

**5'-(4-methylbenzylidene)-[1,1':3',1''-terphenyl]-2'(5'H)-one (1ab):** Yield: 0.3483 g, 99%, a yellow solid, m.p. 155-157 °C; Eluent: PE/DCM = 20/1.  $^1\text{H}$  NMR (400 MHz,  $\text{CDCl}_3$ , TMS)  $\delta$  7.86 (s, 1H), 7.63 – 7.52 (m, 4H), 7.46 – 7.31 (m, 10H), 7.25 (d,  $J = 8.0$  Hz, 2H), 2.39 (s, 3H);  $^{13}\text{C}\{^1\text{H}\}$ -NMR (100 MHz,  $\text{CDCl}_3$ , TMS)  $\delta$  183.7, 146.6, 140.8, 140.3, 140.0, 138.6, 136.9, 136.5, 132.7, 132.6, 131.2, 130.9, 129.9, 129.4, 129.2, 128.09, 128.07, 128.0, 21.6; IR (neat):  $\nu$  3055.14, 3001.87, 2833.64, 1078.52, 1510.29, 1466.85, 1320.26, 1245.18, 1030.75, 837.26, 700.76  $\text{cm}^{-1}$ ; HRMS (ESI-TOF) Calcd for  $\text{C}_{26}\text{H}_{21}\text{O}$   $[\text{M}+\text{H}]^+$  : 349.1587, found: 349.1581.

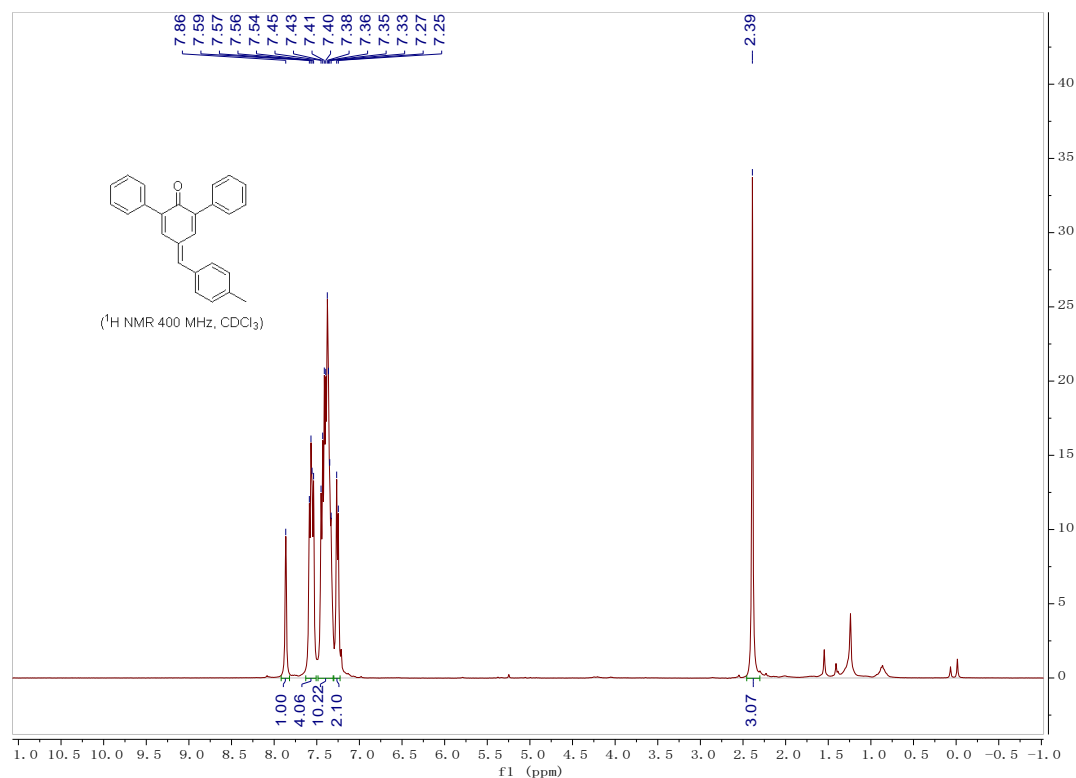

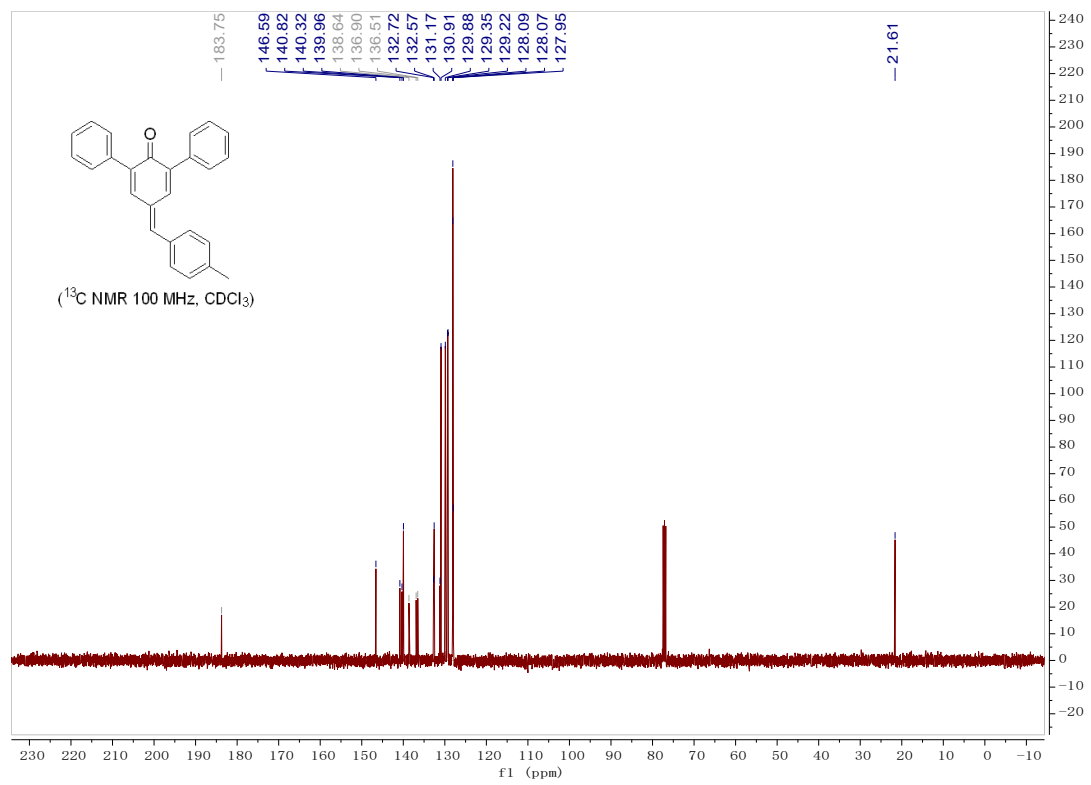



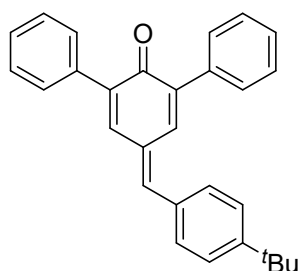

**5'-(4-(tert-butyl)benzylidene)-[1,1':3',1''-terphenyl]-2'-(5'H)-one (1ac):** Yield: 0.3702 g, 95%, a yellow solid, m.p. 163-165 °C; Eluent: PE/DCM = 20/1.  $^1\text{H}$  NMR (400 MHz,  $\text{CDCl}_3$ , TMS)  $\delta$  7.91 (d,  $J = 2.6$  Hz, 1H), 7.62 – 7.56 (m, 4H), 7.52 – 7.50 (m, 3H), 7.46 – 7.33 (m, 9H), 1.36 (s, 9H);  $^{13}\text{C}\{^1\text{H}\}$ -NMR (100 MHz,  $\text{CDCl}_3$ , TMS)  $\delta$  183.8, 153.9, 146.3, 140.4, 139.9, 138.7, 136.9, 136.5, 132.7, 132.6, 131.3, 130.8, 129.4, 129.2, 128.1, 128.0, 127.9, 126.1, 35.0, 31.1; IR (neat):  $\nu$  3058.20, 3029.50, 2961.09, 2867.27, 1711.64, 1620.78, 1598.78, 1542.43, 1493.01, 1361.13, 1334.11, 1156.91  $\text{cm}^{-1}$ ; HRMS (DART) Calcd for  $\text{C}_{29}\text{H}_{27}\text{O}$   $[\text{M}+\text{H}]^+$  : 391.2056, found: 391.2055.

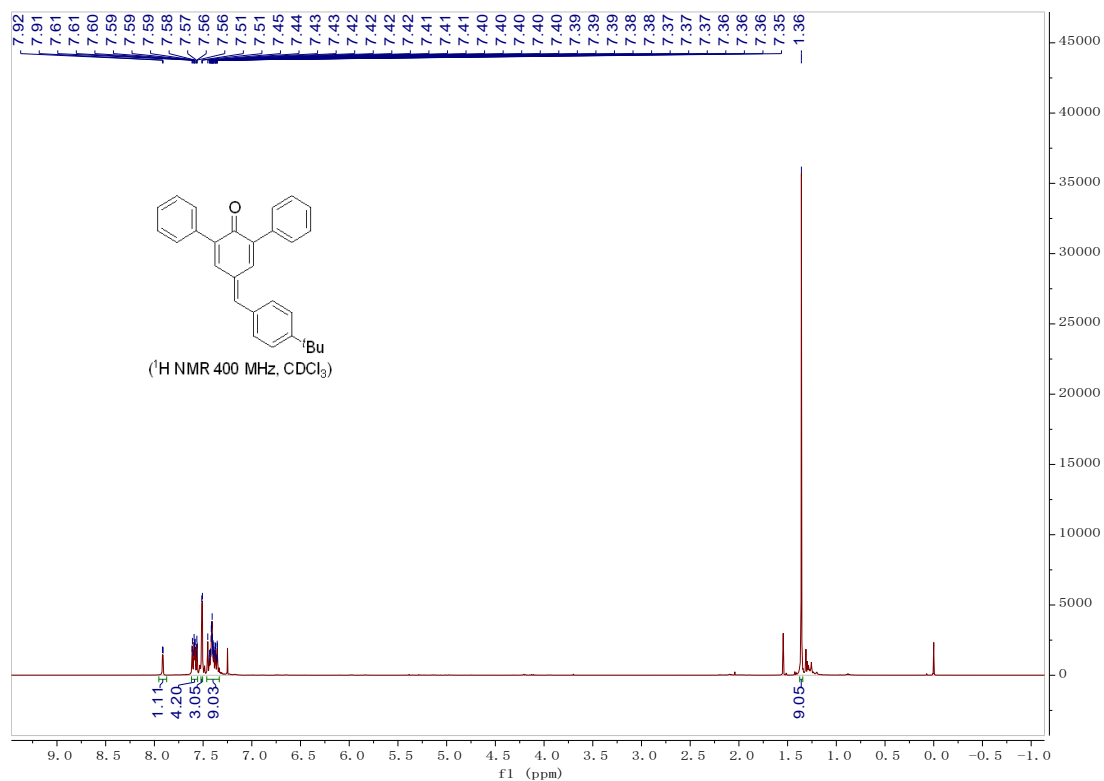

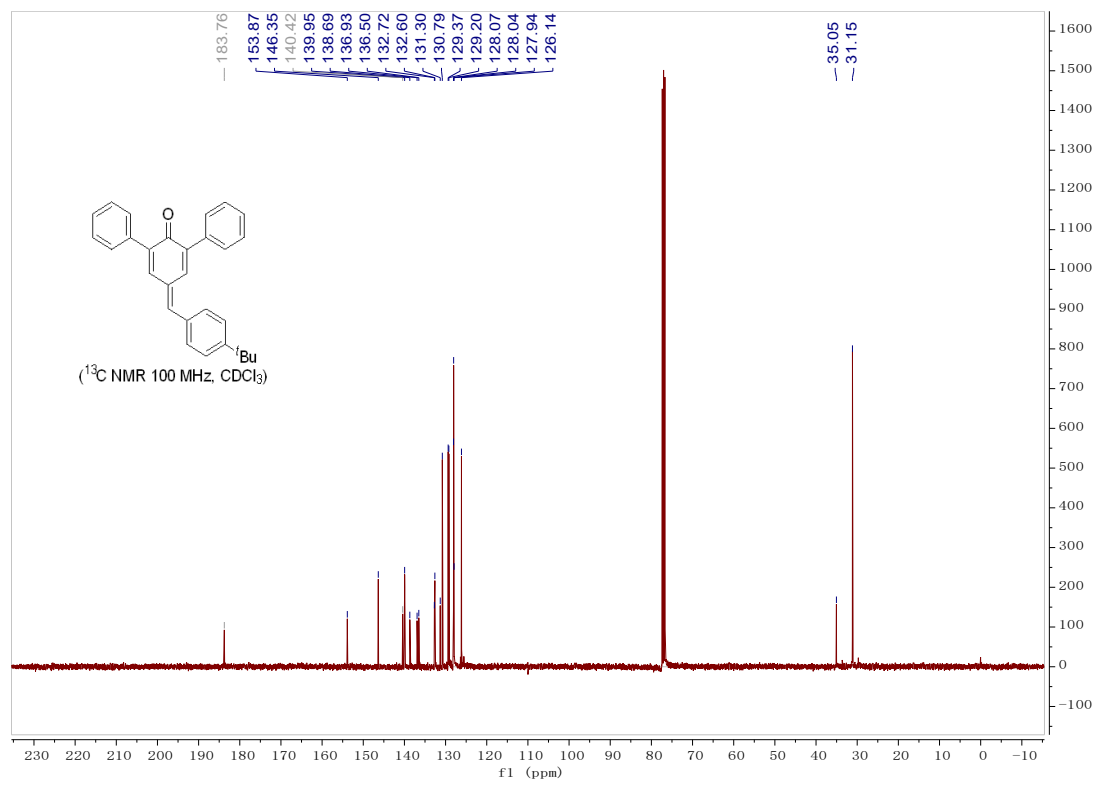

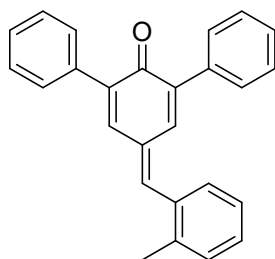

**5'-(2-methylbenzylidene)-[1,1':3',1''-terphenyl]-2'(5'H)-one (1ad):** Yield: 0.3130 g, 90%, a yellow solid, m.p. 183-185 °C; Eluent: PE/DCM = 20/1.  $^1\text{H}$  NMR (400 MHz,  $\text{CDCl}_3$ , TMS)  $\delta$  7.59 (d,  $J = 2.2$  Hz, 1H), 7.55 – 7.40 (m, 5H), 7.38 – 7.16 (m, 11H), 2.31 (s, 3H);  $^{13}\text{C}\{^1\text{H}\}$ -NMR (100 MHz,  $\text{CDCl}_3$ , TMS)  $\delta$  184.0, 145.4, 140.4, 139.5, 139.0, 138.2, 136.7, 136.4, 134.4, 133.0, 132.0, 131.1, 130.7, 130.0, 129.34, 129.25, 128.13, 128.13, 128.07, 126.2, 20.3; IR (neat):  $\nu$  3003.40, 2919.91, 1709.72, 1359.22, 1220.41, 1092.23, 905.45, 751.78, 699.71  $\text{cm}^{-1}$ ; HRMS (ESI-TOF) Calcd for  $\text{C}_{26}\text{H}_{21}\text{O}$   $[\text{M}+\text{H}]^+$  : 349.1587, found: 349.1588.

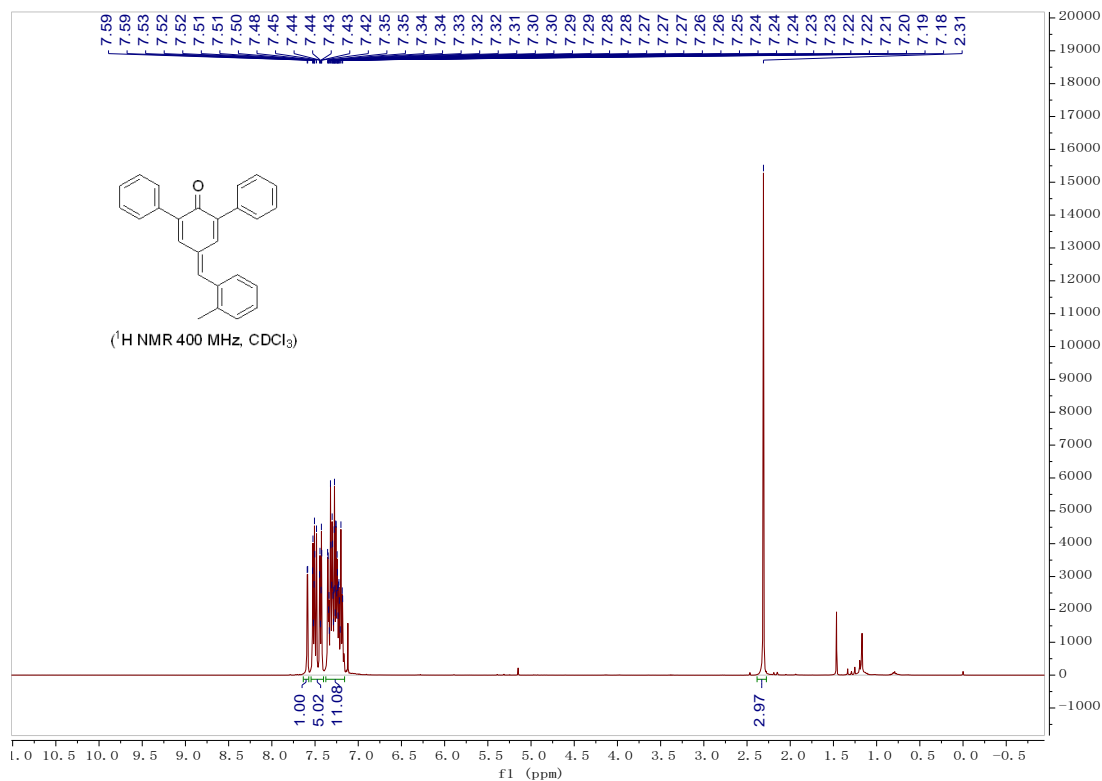

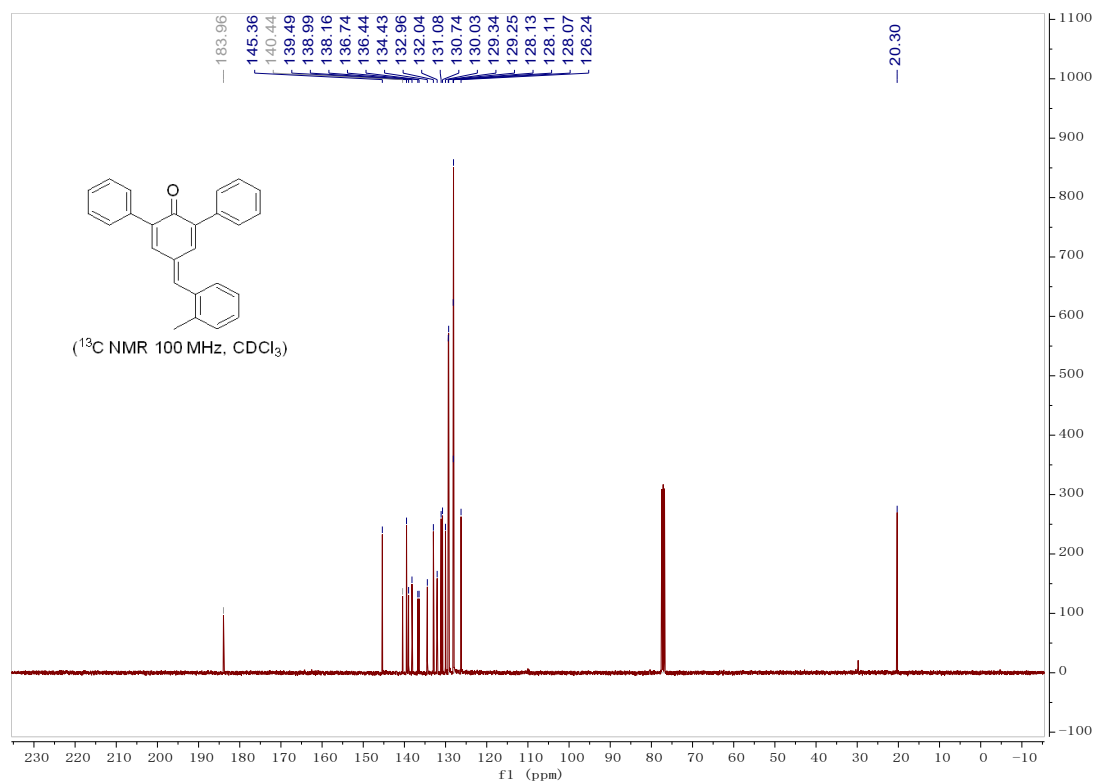

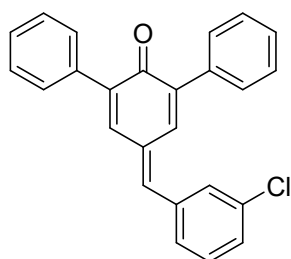

**5'-(3-chlorobenzylidene)-[1,1':3',1''-terphenyl]-2'-(5'H)-one (1ae):** Yield: 0.3665 g, 99%, a yellow solid, m.p. 135-137 °C; Eluent: PE/DCM = 20/1.  $^1\text{H}$  NMR (400 MHz,  $\text{CDCl}_3$ , TMS)  $\delta$  7.76 (d,  $J$  = 2.4 Hz, 1H), 7.61 – 7.50 (m, 5H), 7.49 – 7.33 (m, 11H);  $^{13}\text{C}$   $\{^1\text{H}\}$ -NMR (100 MHz,  $\text{CDCl}_3$ , TMS)  $\delta$  183.8, 143.5, 140.9, 139.2, 137.0, 136.4, 136.1, 135.0, 132.7, 131.7, 130.2, 129.7, 129.3, 129.2, 128.5, 128.3, 128.2, 128.1; IR (neat):  $\nu$  3058.20, 3000.79, 2927.74, 1710.21, 1624.82, 1549.84, 1359.41, 1219.94, 1091.82, 728.78  $\text{cm}^{-1}$ ; HRMS (ESI-TOF) Calcd for  $\text{C}_{25}\text{H}_{18}\text{OCl}$   $[\text{M}+\text{H}]^+$  : 369.1041, found: 369.1041.

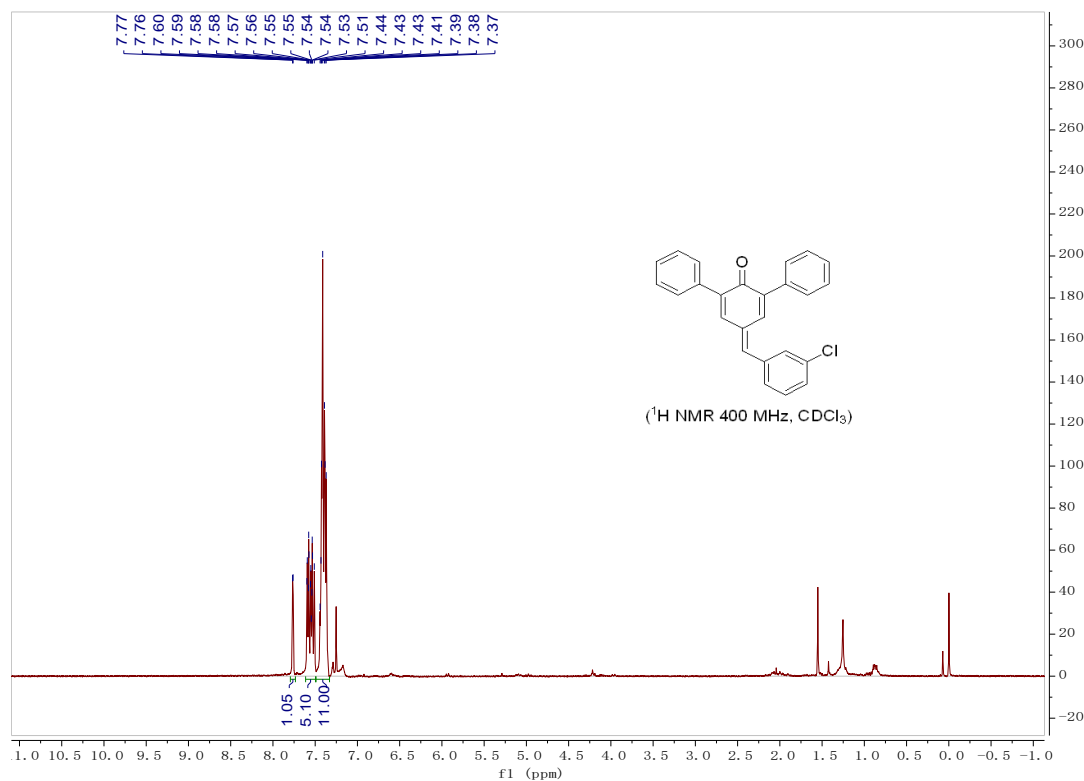

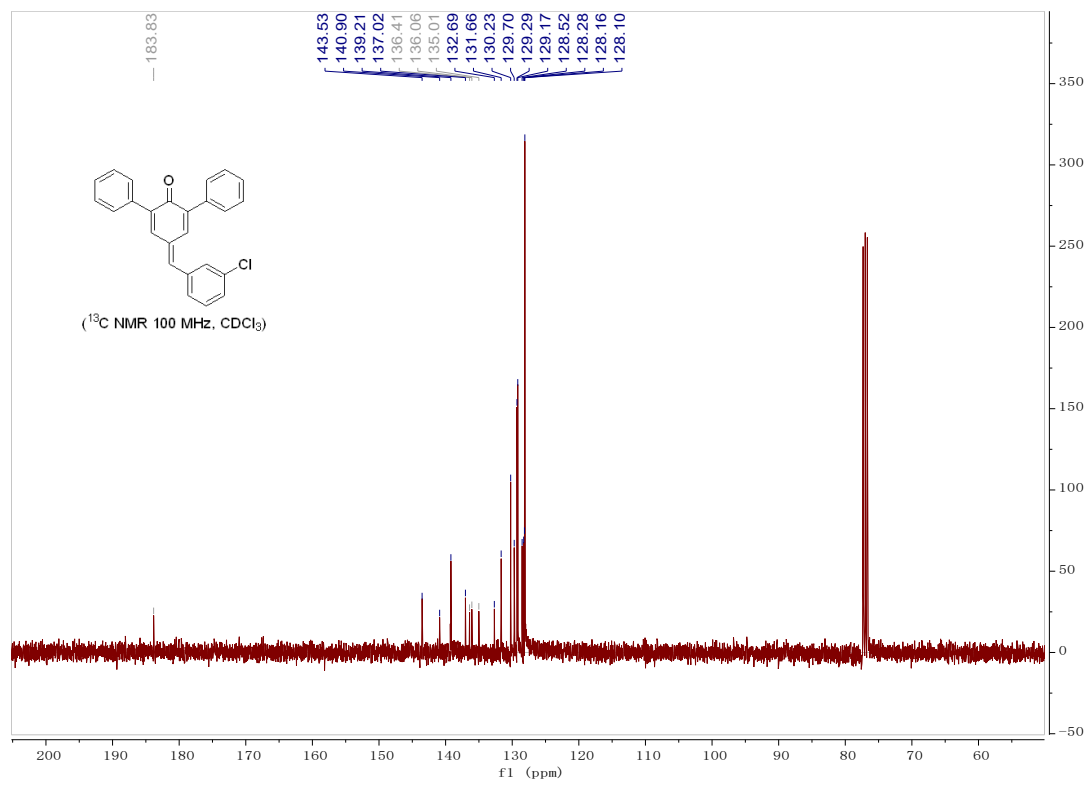

### (K) X-ray Analysis

Single crystals suitable for XRD were obtained by evaporation experiment:

Compounds **3a** and **4a** (50 mg) were dissolved in 0.5 mL of ethyl acetate, and then 2.0 mL *n*-pentane was added, allowing this mixed solution evaporate slowly in a dry environment. Crystals were obtained in about 3-5 days with the evaporation of the solvent.

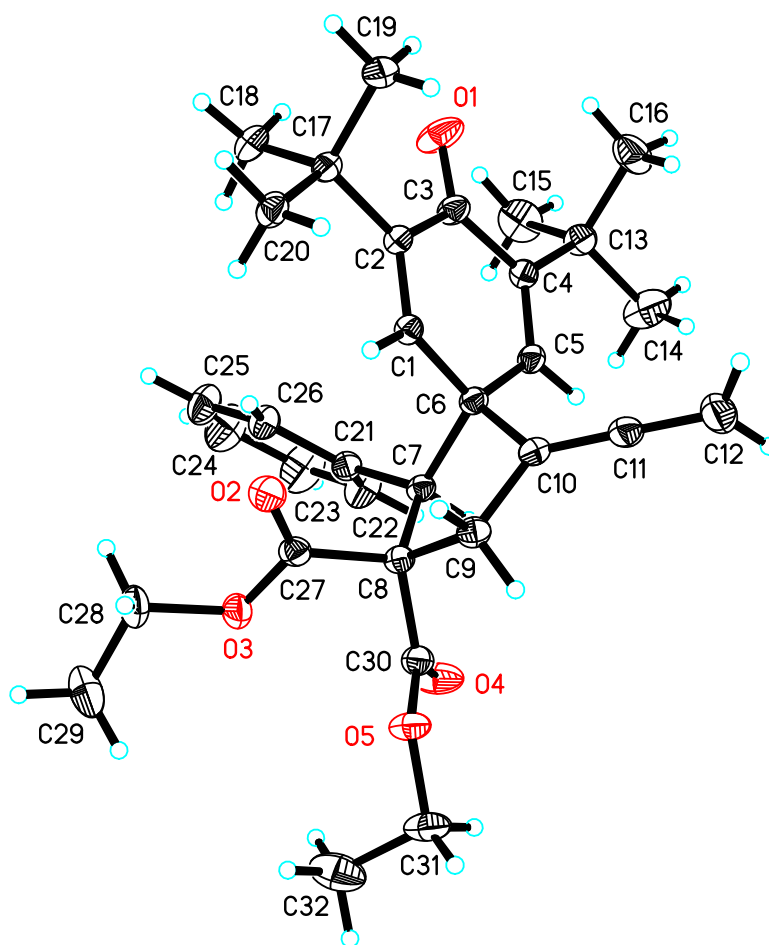

The crystal data of **3a** have been deposited in CCDC with number 2225338. Empirical Formula:  $C_{32}H_{40}O_5$ ; Formula Weight: 504.64; Crystal Color, Habit: colorless, Crystal Dimensions: 0.200 x 0.150 x 0.120 mm<sup>3</sup>; Crystal System: Monoclinic; Lattice Parameters:  $a = 11.9977(4)$  Å,  $b = 16.6903(6)$  Å,  $c = 14.9089(6)$  Å,  $\alpha = 90^\circ$ ,  $\beta = 95.2780(10)^\circ$ ,  $\gamma = 90^\circ$ ,  $V = 2972.78(19)$  Å<sup>3</sup>; Space group: P 21/n;  $Z = 4$ ;  $D_{calc} = 1.128$  g/cm<sup>3</sup>;  $F_{000} = 1088$ ; Final R indices [ $I > 2\sigma(I)$ ]  $R1 = 0.0469$ ,  $wR2 = 0.1106$ .

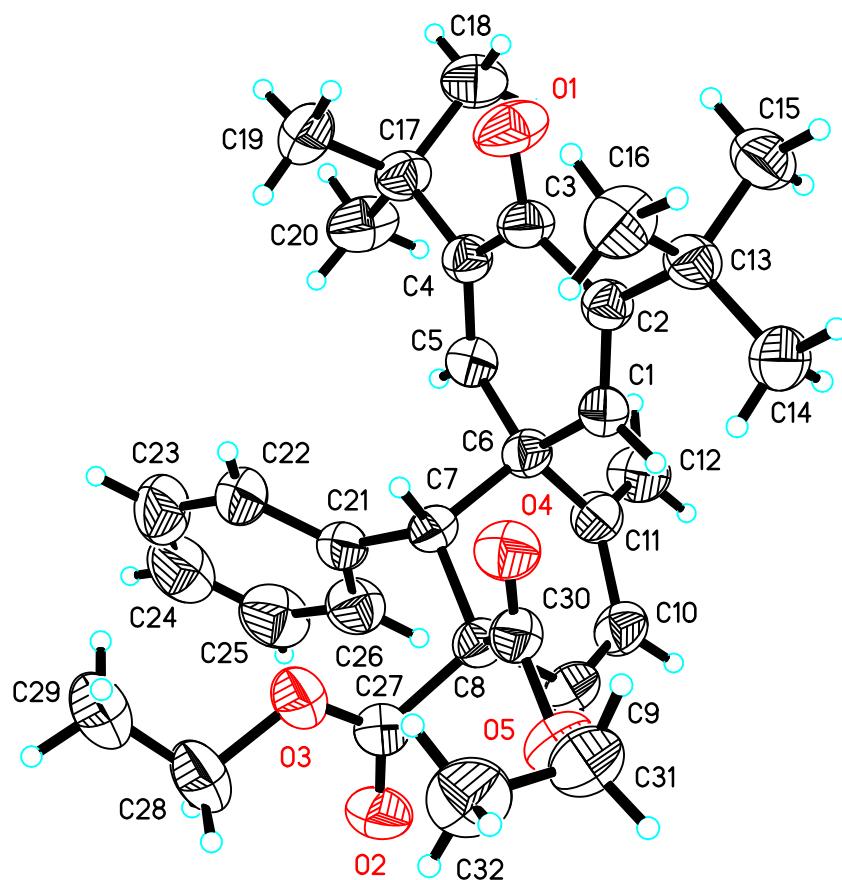

The crystal data of **4a** have been deposited in CCDC with number 2288733. Empirical Formula:  $C_{32}H_{40}O_5$ ; Formula Weight: 504.64; Crystal Color, Habit: colorless, Crystal Dimensions: 0.200 x 0.150 x 0.120 mm<sup>3</sup>; Crystal System: Monoclinic; Lattice Parameters:  $a = 43.5637(17)$  Å,  $b = 7.2829(3)$  Å,  $c = 18.9126(9)$  Å,  $\alpha = 90^\circ$ ,  $\beta = 101.028(3)^\circ$ ,  $\gamma = 90^\circ$ ,  $V = 5889.6(4)$  Å<sup>3</sup>; Space group:  $C 2/c$ ;  $Z = 8$ ;  $D_{calc} = 1.138$  g/cm<sup>3</sup>;  $F_{000} = 2176$ ; Final R indices [ $I > 2\sigma(I)$ ]  $R1 = 0.0907$ ,  $wR2 = 0.2674$ .



## **(L) Computational Details**

### **Computational methods**

All DFT calculations were performed with Gaussian 16 program.<sup>7</sup> The geometries of all minima and transition states have been optimized at B3LYP-D3BJ/6-31G(d,p) level of theory for all nonmetallic atom (H, C, N, O and P) and SDD level of theory for metallic atom Pd. The subsequent frequency calculations on the stationary points were carried out at the same level of theory to ascertain the nature of the stationary points as minima or first-order saddle points on the respective potential energy surfaces. All transition states were characterized by one and only one imaginary frequency pertaining to the desired reaction coordinate. Thermochemical corrections to 298.15 K have been calculated for all minima from unscaled vibrational frequencies obtained at this same level. The solvent effect was estimated by the SMD method in solvent. Solution-phase single point energy calculations were performed at B3LYP-D3BJ/def2tzvp level for all nonmetallic atom (H, C, N, O and P) and SDD level of theory for metallic atom Pd based on the gas phase optimized structures. The possible conformers for each species were searched manually, and the best conformer was used to calculate the reaction energy profile.

### Scheme S6. DFT calculation of condition A

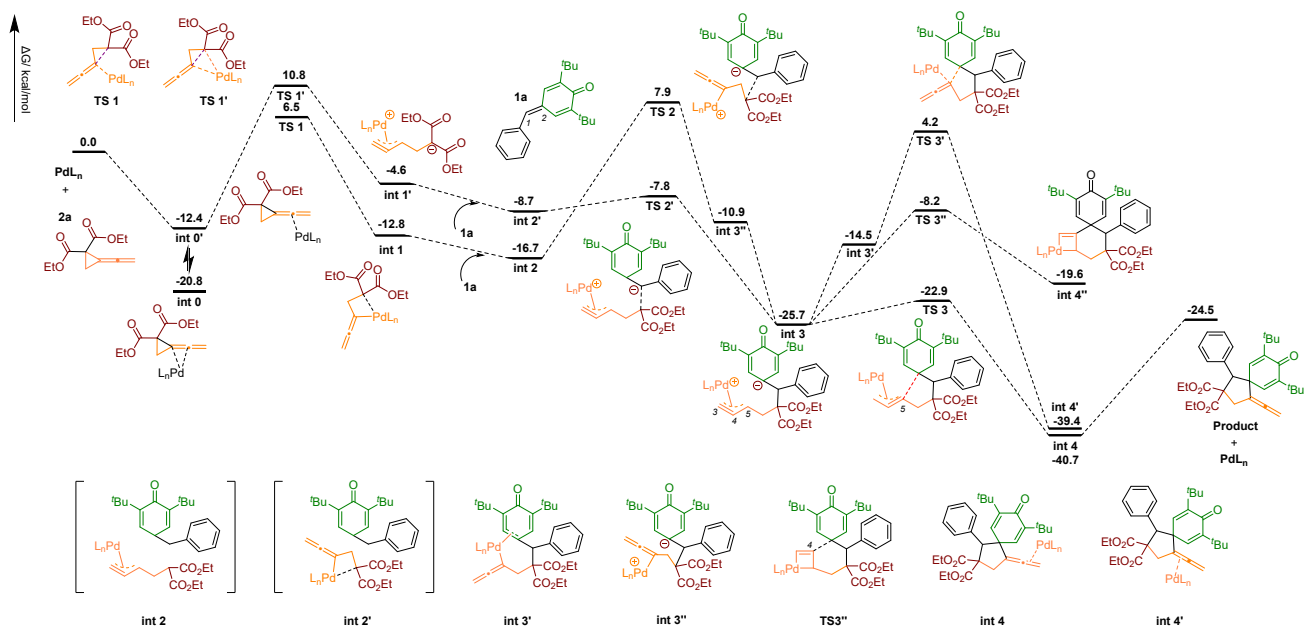

Table S1.<sup>a</sup> DFT calculation of condition A

|                        | G <sub>298</sub> <sup>a</sup> | E <sub>tot</sub> (E <sub>h</sub> ) <sup>a</sup> | E <sub>tot</sub> (E <sub>h</sub> ), MeCN <sup>b</sup> |
|------------------------|-------------------------------|-------------------------------------------------|-------------------------------------------------------|
| <b>2a</b>              | -728.293025                   | -728.478677                                     | -728.250554                                           |
| <b>PdL<sub>n</sub></b> | -2274.356111                  | -2274.820264                                    | -2274.01913                                           |
| <b>1a</b>              | -890.885923                   | -891.253567                                     | -890.76864                                            |
| <b>Int0</b>            | -3002.686947                  | -3003.367641                                    | -3002.333772                                          |
| <b>Int0'</b>           | -3002.665790                  | -3003.344893                                    | -3002.318801                                          |
| <b>TS1'</b>            | -3002.645706                  | -3003.32554                                     | -3002.282512                                          |
| <b>TS1</b>             | -3002.643654                  | -3003.320991                                    | -3002.286923                                          |
| <b>Int1</b>            | -3002.656652                  | -3003.342003                                    | -3002.31264                                           |
| <b>Int1'</b>           | -3002.688406                  | -3003.371298                                    | -3002.323287                                          |
| <b>Int2</b>            | -3893.56723                   | -3894.644214                                    | -3893.124442                                          |
| <b>Int2'</b>           | -3893.542652                  | -3894.621444                                    | -3893.113558                                          |
| <b>Int2</b>            | -3893.56723                   | -3894.644214                                    | -3893.124442                                          |
| <b>TS2'</b>            | -3893.532843                  | -3894.613863                                    | -3893.114424                                          |
| <b>TS2</b>             | -3893.523696                  | -3894.600126                                    | -3893.084666                                          |
| <b>Int3</b>            | -3893.555295                  | -3894.638822                                    | -3893.145286                                          |
| <b>Int3'</b>           | -3893.553127                  | -3894.63469                                     | -3893.125538                                          |
| <b>Int3''</b>          | -3893.539393                  | -3894.618019                                    | -3893.116911                                          |
| <b>TS3</b>             | -3893.554606                  | -3894.636014                                    | -3893.138876                                          |
| <b>TS3'</b>            | -3893.525662                  | -3894.604985                                    | -3893.093456                                          |
| <b>TS3''</b>           | -3893.540689                  | -3894.624189                                    | -3893.11743                                           |
| <b>Int4</b>            | -3893.596722                  | -3894.674873                                    | -3893.163969                                          |
| <b>Int4''</b>          | -3893.560981                  | -3894.646356                                    | -3893.137477                                          |
| <b>Int4'</b>           | -3893.592745                  | -3894.674534                                    | -3893.16548                                           |
| <b>product</b>         | -1619.226011                  | -1619.809475                                    | -1619.088461                                          |

(a) Calculated at B3LYP(D3BJ)/6-31g(d, p)/SDD

(b) Calculated at M06(D3)/def2-tzvp/SDD/SMD(MeCN)

**Table S2.**<sup>a</sup> DFT calculation of **condition B**

|                                              | G <sub>298</sub> <sup>a</sup> | E <sub>tot</sub> (E <sub>h</sub> ) <sup>a</sup> | E <sub>tot</sub> (E <sub>h</sub> ), MeCN <sup>b</sup> |
|----------------------------------------------|-------------------------------|-------------------------------------------------|-------------------------------------------------------|
| <b>PdL<sub>n</sub></b>                       | -1641.213192                  | -1641.573248                                    | -1640.949456                                          |
| <b>2a</b>                                    | -728.293025                   | -728.478677                                     | -728.250554                                           |
| <b>PdL<sub>n</sub>'</b>                      | -1641.192612                  | -1641.547852                                    | -1640.923591                                          |
| <b>1a</b>                                    | -890.885923                   | -891.253567                                     | -890.760018                                           |
| <b>Int0-B</b>                                | -2369.529803                  | -2370.104747                                    | -2369.24523                                           |
| <b>Int0'-B</b>                               | -3002.686947                  | -3003.367641                                    | -3002.333772                                          |
| <b>TS1-B</b>                                 | -2369.503608                  | -2370.078741                                    | -2369.207146                                          |
| <b>TS1'-B</b>                                | -3002.643654                  | -3003.320991                                    | -3002.286923                                          |
| <b>Int1-B</b>                                | -2369.511324                  | -2370.085161                                    | -2369.231233                                          |
| <b>Int1'-B</b>                               | -2369.548067                  | -2370.123054                                    | -2369.255667                                          |
| <b>Int2-B</b>                                | -3260.398052                  | -3261.366103                                    | -3260.032277                                          |
| <b>TS2-B</b>                                 | -3260.394131                  | -3261.365404                                    | -3260.026845                                          |
| <b>Int2'-B</b>                               | -3260.42540                   | -3261.391135                                    | -3260.043886                                          |
| <b>TS2'-B</b>                                | -3260.39728                   | -3261.368673                                    | -3260.017819                                          |
| <b>Int3-B</b>                                | -3260.415901                  | -3261.389292                                    | -3260.05541                                           |
| <b>TS3-B</b>                                 | -3260.40402                   | -3261.377242                                    | -3260.037122                                          |
| <b>Int4-B</b>                                | -3260.426114                  | -3261.398654                                    | -3260.061335                                          |
| <b>Int3'-B</b>                               | -3260.434541                  | -3261.408725                                    | -3260.062044                                          |
| <b>TS3'-B</b>                                | -3260.409698                  | -3261.381823                                    | -3260.036446                                          |
| <b>Int3''-B</b>                              | -3260.40045                   | -3261.373556                                    | -3260.028531                                          |
| <b>TS3''-B</b>                               | -3260.404365                  | -3261.378592                                    | -3260.029636                                          |
| <b>Int4'-B</b>                               | -3260.445428                  | -3261.421604                                    | -3260.085449                                          |
| <b>3a</b>                                    | -1619.226011                  | -1619.809475                                    | -1619.075439                                          |
| <b>Int 4-B + HCO<sub>3</sub><sup>-</sup></b> | -3524.899536                  | -3525.894573                                    | -3524.574875                                          |
| <b>TS7</b>                                   | -3524.847789                  | -3525.84534                                     | -3524.533302                                          |
| <b>Int8</b>                                  | -3524.845958                  | -3525.84614                                     | -3524.53696                                           |
| <b>Int8 - HCO<sub>3</sub><sup>-</sup></b>    | -3260.890723                  | -3261.882732                                    | -3260.554735                                          |
| <b>TS8</b>                                   | -3260.844384                  | -3261.829411                                    | -3260.498278                                          |
| <b>Int9</b>                                  | -3260.862292                  | -3261.846277                                    | -3260.509826                                          |
| <b>Int5</b>                                  | -3524.897648                  | -3525.888888                                    | -3524.574006                                          |
| <b>TS5</b>                                   | -3524.891819                  | -3525.886195                                    | -3524.563294                                          |
| <b>Int6</b>                                  | -3524.89424                   | -3525.891528                                    | -3524.574728                                          |
| <b>TS6</b>                                   | -3524.884335                  | -3525.876999                                    | -3524.549891                                          |
| <b>Int7</b>                                  | -3524.924819                  | -3525.91787                                     | -3524.604498                                          |
| <b>4a</b>                                    | -1619.250687                  | -1619.837018                                    | -1619.097054                                          |
| <b>PdLn + HCO<sub>3</sub><sup>-</sup></b>    | -1905.690359                  | -1906.069186                                    | -1905.473739                                          |
| <b>HCO<sub>3</sub><sup>-</sup></b>           | -264.434189                   | -264.434743                                     | -264.496322                                           |

(a) Calculated at B3LYP(D3BJ)/6-31g(d, p)/SDD

(b) Calculated at M06(D3)/def2-tzvp/SDD/SMD(1,4-dioxane)

## Archive Entries

### DFT calculation data of **condition A**

#### **2a**

1\1\GINC-OMC-1-821\Freq\RB3LYP\6-31G(d,p)\C11H14O4\SHIMGRP\15-Mar-2023  
\0\#P Geom=AllCheck Guess=TCheck SCRF=Check GenChk RB3LYP/6-31G(d,p)  
Freq\1a\_opt\_freq\0,1\C,-0.0361470929,-0.0906203327,0.2023579826\C,-0  
.0768257244,0.5907997647,1.5882653195\C,0.1170200923,1.389736574,0.382  
8696507\H,0.7857299631,0.4157454384,2.2257603738\H,-1.0422180613,0.613  
0526756,2.0834631236\C,0.2675488934,2.5097533679,-0.2372482733\C,0.426  
9957457,3.6408925886,-0.8743666869\H,1.4174439663,4.040171376,-1.07787  
76359\H,-0.4234902704,4.2199253867,-1.2252545306\C,1.1648362692,-0.945  
78492,-0.0996360407\C,-1.3120817112,-0.5273090243,-0.4693894916\O,-2.3  
853654591,-0.3449821699,0.3278336678\O,2.3119695443,-0.2873978366,0.16  
49535224\O,1.110892462,-2.0953347855,-0.4709618538\O,-1.3718702167,-0.  
9339658871,-1.6059773221\C,-3.6652890299,-0.6304991325,-0.2823843391\C  
, -4.733024857,-0.322705741,0.7468236109\H,-3.677745537,-1.6792805865,-  
0.5927556151\H,-3.7679110396,-0.0187296945,-1.1836637485\H,-4.60319286  
66,-0.9406403185,1.6396386839\H,-5.7227866298,-0.5266580429,0.32766932  
46\H,-4.6951276853,0.7286820781,1.0454315125\C,3.5238781125,-1.0573040  
76,-0.0069107532\C,4.6850917763,-0.1471579062,0.3357933454\H,3.5674774  
941,-1.4142090471,-1.0398805116\H,3.4790800702,-1.9363001085,0.6435051  
888\H,4.701464532,0.725678667,-0.3224589009\H,5.6287164808,-0.68792692  
72,0.2171789378\H,4.6150867791,0.20235762,1.3696734589\

#### **PdLn**

1\1\GINC-OMC-1-818\Freq\RB3LYP\GenECP\C36H28O1P2Pd1\SHIMGRP\16-Mar-202  
3\0\#P Geom=AllCheck Guess=TCheck SCRF=Check GenChk RB3LYP/GenECP Fre  
q\PdDPE2\0,1\O,-0.3536266864,-1.1711903569,1.2754674613\C,0.86887721  
97,-1.697938007,1.6557873006\C,-0.6928845374,0.1310615184,1.5759374848  
\C,2.0276929356,-1.4876152088,0.8818623859\C,0.8824811566,-2.521877378  
1,2.7789134359\C,2.0632536119,-3.1530137469,3.1677206303\C,3.201424107  
5,-2.1361349064,1.2952326526\C,3.225383463,-2.9569490182,2.4231045599\  
H,4.1086704305,-1.9988151891,0.7178286655\H,4.1510580272,-3.4440717118  
,2.7137348537\H,2.0706362453,-3.7947927406,4.0431880274\H,-0.043960502  
2,-2.6609927167,3.3259537474\C,-1.6357481469,0.7323334392,0.7199199272  
\C,-0.1568002213,0.810571542,2.6649115732\C,-0.5729312542,2.116567501,  
2.9258624446\C,-2.0526581279,2.0340426553,1.0200985899\C,-1.527807923,  
2.7251478216,2.1137023029\H,-2.7777042616,2.5181138564,0.3754893269\H,  
-1.8555712621,3.7392062169,2.3196977416\H,0.588420733,0.3268821335,3.2  
855855565\H,-0.142654455,2.6545391645,3.7645643473\O,1.9826777152,-0.3

962318769,-0.6185573187\P,-2.0725906008,-0.1402277601,-0.8480120891\C,  
2.1587201811,1.2537614236,0.1863872259\C,3.6465193602,-0.7118005484,-1  
.3461793021\C,-3.1217457214,-1.5324488623,-0.2696647019\C,-3.296089281  
6,1.0171472207,-1.5911225889\C,-3.7464550526,-1.5419423087,0.984394002  
1\C,-3.2962914575,-2.6254620887,-1.128742001\C,-4.0968437741,-3.701949  
7225,-0.7489808714\C,-4.5412517521,-2.6228220351,1.3669869683\C,-4.720  
2476072,-3.7026249406,0.5004616416\H,-3.603854899,-0.7048583657,1.6606  
950667\H,-2.7909826141,-2.6294636855,-2.0907185459\H,-4.2257986752,-4.  
5440277073,-1.4226147449\H,-5.0195944271,-2.6224835004,2.3422846877\H,  
-5.3372257274,-4.5445116338,0.8004939018\C,2.9742815508,1.4560715172,1  
.3096372373\C,1.410479878,2.3260317042,-0.3142425615\C,1.4793598386,3.  
5800688216,0.2922839692\C,2.2987533084,3.7750532264,1.404034283\C,3.04  
75373471,2.7109078136,1.911556583\H,0.7517940257,2.1525350454,-1.16037  
50014\H,0.8807866672,4.3991240149,-0.0945296538\H,2.3469522129,4.74970  
6011,1.8808333049\H,3.6807767656,2.8562838245,2.7820872112\H,3.5387507  
638,0.6261374638,1.7228374187\C,4.7489303718,0.1405135538,-1.205324198  
4\C,3.7793923674,-1.8705152039,-2.1293130678\C,4.994433811,-2.18486986  
33,-2.7324958489\C,5.9618912524,-0.1668003789,-1.8262141856\C,6.090401  
9389,-1.3304404741,-2.5838810211\H,4.6620666819,1.0446581531,-0.613574  
1062\H,2.9189054846,-2.5209864726,-2.2647752942\H,5.0838622599,-3.0881  
072852,-3.3288783162\H,6.8076527952,0.5054831059,-1.7136933151\H,7.035  
3047946,-1.5675885613,-3.0635993246\C,-2.8315086304,1.8938878064,-2.58  
18075819\C,-4.6423795476,1.0747499872,-1.205165218\C,-5.5045116517,1.9  
984330957,-1.7960629772\C,-3.6914600207,2.8247098997,-3.1643441986\C,-  
5.0303882515,2.8771190822,-2.7726039525\H,-1.7914970321,1.8307635697,-  
2.8924606264\H,-5.0151300405,0.3950147215,-0.4458972899\H,-6.547319800  
2,2.032762508,-1.4939877039\H,-3.3201798424,3.4997677632,-3.9298846876  
\H,-5.7041490835,3.5948327523,-3.2313175283\Pd,-0.0055284334,-0.554743  
6786,-1.7198546938\

### 1a

1\1\GINC-OMC-1-823\Freq\RB3LYP\6-31G(d,p)\C21H26O1\SHIMGRP\12-Mar-2023  
\0\#P Geom=AllCheck Guess=TCheck SCRF=Check GenChk RB3LYP/6-31G(d,p)  
Freq\|tBu\|0,1\C,-1.9790887033,0.4659820702,0.0592738551\C,-1.91638275  
93,-1.0227800638,0.0178032087\C,-0.7012414366,-1.6164766211,-0.0572623  
836\C,0.5453484547,-0.8784017412,-0.0790122614\C,0.4646266705,0.565930  
6117,-0.1349711184\C,-0.7101946451,1.2388907627,-0.0787292571\H,-0.618  
1052224,-2.6975195781,-0.0708189992\H,1.3903449399,1.1057151492,-0.271  
3118489\C,-0.7810081114,2.7673593888,-0.1640759827\C,-3.2233004167,-1.  
8213156892,0.0732249536\C,-1.3831235633,3.3327475228,1.1434393088\H,-2  
.3931748641,2.957678886,1.3022207223\H,-1.4160972835,4.4265611162,1.09  
17295315\H,-0.7645814112,3.0542938668,2.0035274125\C,-1.6528504088,3.1  
879069279,-1.3693830146\H,-2.6710790117,2.815011083,-1.2663327163\H,-1  
.2295250679,2.8036719684,-2.3036595059\H,-1.6848782866,4.2806383339,-1

.4382496622\C,0.6129407109,3.3911219839,-0.3500370006\H,1.2791736229,3  
.1657010213,0.4894616071\H,0.5148924246,4.4790512445,-0.4083839785\H,1  
.0947346232,3.0523951576,-1.2731288177\C,-4.125857448,-1.4285878408,-1  
.1191139888\H,-4.3811020434,-0.3702082162,-1.0852763703\H,-5.051153850  
6,-2.0141817599,-1.0902084645\H,-3.6228785835,-1.6396262634,-2.0689628  
792\C,-3.9561795541,-1.5347045574,1.4040656019\H,-4.2048678625,-0.4780  
761686,1.4936126761\H,-3.332202288,-1.8234442694,2.2567047654\H,-4.881  
2687942,-2.1197812441,1.4496324994\C,-2.9669356357,-3.3357455503,-0.00  
85649611\H,-2.4645604581,-3.6163131696,-0.9403385575\H,-3.9239063757,-  
3.8647715438,0.0227894357\H,-2.3643933899,-3.6958464123,0.831912826\O,  
-3.0636203466,1.0503733983,0.1816231985\C,1.7219389762,-1.5783245977,-  
0.0802077073\C,3.0894628898,-1.0824302304,0.01757761\H,1.6370853848,-2  
.6595922437,-0.1824342362\C,3.4478971129,0.053596529,0.7707864055\C,4.  
771623728,0.4787035171,0.8284159743\C,5.7682388664,-0.221397168,0.1460  
474601\C,4.1143189383,-1.7990751491,-0.6317568718\C,5.4348874301,-1.36  
70899715,-0.579805146\H,2.6908989183,0.5747252707,1.3446103622\H,3.857  
5567747,-2.6916282984,-1.1951625618\H,6.2064461032,-1.9259290046,-1.10  
0141865\H,5.028703891,1.3517142313,1.4201852572\H,6.7997733619,0.11289  
83113,0.1939444849\

**Int0'**

I\1\GINC-A01R06N08\Freq\RB3LYP\GenECP\C47H42O5P2Pd1\ACJSGGHI7X\14-Jan-  
2024\0\#P Geom=AllCheck Guess=TCheck SCRF=Check GenChk RB3LYP/GenECP  
Freq\TS2\0,1\O,1.4295101608,0.0085308279,2.0873338295\C,2.4260922861  
,0.9118740239,1.7758643747\C,1.7137809933,-1.3297027204,2.2990965009\C  
,2.0119639621,2.0534419666,1.0654733416\C,3.7527603376,0.7214317633,2.  
1484088648\C,4.6972064115,1.6953667182,1.823323026\C,2.9773620822,3.02  
50220842,0.7747490644\C,4.3102439438,2.8524633171,1.1494966653\H,2.683  
2602913,3.9135498604,0.2274233624\H,5.0437951053,3.613559279,0.9031640  
374\H,5.7358487102,1.5426143249,2.0992312067\H,4.0409732356,-0.1846566  
598,2.6684565707\C,1.7174027555,-2.219008888,1.2093939971\C,1.87488110  
66,-1.7736725431,3.6083932973\C,2.0462036673,-3.1353194388,3.859075525  
8\C,1.8928998591,-3.5828538648,1.4866882382\C,2.0532180154,-4.03899794  
17,2.7957035473\H,1.8891635627,-4.2920159646,0.6666547598\H,2.18255923  
06,-5.1004944355,2.9825784816\H,1.8421288556,-1.0465226423,4.412508474  
8\H,2.1666802193,-3.4857582441,4.8792954739\O,0.3254298362,2.060999383  
4,0.3299248594\O,1.4422501676,-1.5353886545,-0.481787514\C,-0.78940932  
12,2.1180271236,1.7858711068\C,0.218895639,3.7672637442,-0.3520591387\  
C,3.1424930509,-0.9184753845,-0.8465333406\C,1.3307596845,-3.04182099,  
-1.5243515907\C,4.2875657454,-1.6127783125,-0.4300915154\C,3.292564584  
,0.2810450723,-1.5527574988\C,4.5639819013,0.7843126667,-1.8297521304\  
C,5.5570934834,-1.1125627211,-0.7108454238\C,5.6973593695,0.0894783285  
,-1.4087222091\H,4.1824144315,-2.5409758564,0.1224987508\H,2.402904446  
2,0.8237486704,-1.8600563609\H,4.6666895788,1.7252047739,-2.3617792397

\H,6.4373459088,-1.6568604595,-0.3809949287\H,6.6871986265,0.484350268  
6,-1.6180854737\C,-0.3806532765,2.557160447,3.0517752872\C,-2.10503495  
6,1.6714925407,1.6077201005\C,-3.0072358782,1.6760636792,2.6703714285\  
C,-2.5967118727,2.1286571365,3.9255323108\C,-1.283335239,2.5647794189,  
4.1156527492\H,-2.4034605215,1.3021594316,0.6326975635\H,-4.0084751728  
,1.2870916786,2.5185838892\H,-3.293044668,2.1252525605,4.7590808113\H,  
-0.9594246071,2.9052787839,5.0951026325\H,0.6450821958,2.8787010306,3.  
2050011796\C,0.0687630055,4.9091119239,0.4474953155\C,0.2990810829,3.9  
122814742,-1.7433414198\C,0.2489934772,5.1788053389,-2.3272518057\C,0.  
0077545226,6.1735781902,-0.1369030371\C,0.1023809668,6.3107872649,-1.5  
242211179\H,-0.00745502,4.8061112765,1.5251965871\H,0.3843466906,3.018  
8171049,-2.3568857256\H,0.3131862121,5.2806466072,-3.4067331885\H,-0.1  
142238295,7.0527479037,0.489218628\H,0.0541760926,7.2969002107,-1.9767  
78643\C,0.2083947401,-3.8732241316,-1.3675875538\C,2.2304304011,-3.307  
3974925,-2.5664881374\C,2.0149836334,-4.3854602941,-3.4274911203\C,0.0  
064314627,-4.9568825564,-2.2181886476\C,0.9062910532,-5.2143452871,-3.  
2556371305\H,-0.5101652027,-3.6852322311,-0.5787902952\H,3.1000778164,  
-2.6748507083,-2.7052789222\H,2.7205811754,-4.5788101876,-4.2305464114  
\H,-0.8634348957,-5.5904341033,-2.0726518352\H,0.7423948261,-6.0528439  
986,-3.9260458984\Pd,-0.1212022327,0.2012426575,-1.0166441035\C,-3.271  
3581572,-1.6215872556,-0.6461113377\C,-3.646027273,-2.284987408,-1.992  
1063598\C,-2.4645252902,-1.4424267607,-1.8906424832\H,-4.5369258928,-1  
.9064510368,-2.4898846116\H,-3.5123205508,-3.3645809143,-2.0110489958\  
C,-1.440542919,-0.7887935404,-2.3645359382\C,-0.7226051227,-0.06951068  
09,-3.2655254502\H,0.2445572804,-0.4072860998,-3.6279754903\H,-1.18510  
50259,0.7657332352,-3.7854857685\C,-4.1512236595,-0.4954821348,-0.1825  
778821\C,-2.6863200615,-2.4898719703,0.429920903\O,-2.2379895857,-1.74  
03607042,1.4419786334\O,-4.2345236333,0.483229322,-1.1080605394\O,-4.7  
469210634,-0.4800400269,0.8753891816\O,-2.5666277292,-3.6991788501,0.3  
601836031\C,-1.6659260864,-2.4335502722,2.5766659098\C,-1.5219997931,-  
1.4142737217,3.6875625885\H,-0.7040512789,-2.8549783709,2.2771991993\H  
, -2.3298374641,-3.2586968557,2.848937863\H,-0.8959405161,-0.5783901514  
,3.3690077617\H,-1.0586582249,-1.8867609909,4.5587696865\H,-2.49798117  
32,-1.0173376428,3.9757058341\C,-5.1218455716,1.5846631286,-0.80470523  
27\C,-6.5678300048,1.2280292487,-1.1067705522\H,-4.7623816538,2.396248  
2481,-1.4400874193\H,-4.9912834516,1.8638933288,0.2430193174\H,-6.6780  
846222,0.910342575,-2.1477940851\H,-7.208624841,2.1006056223,-0.943746  
7289\H,-6.9071937308,0.4237577347,-0.4503926789\

**Int0**

1\1\GINC-OMC-1-817\Freq\RB3LYP\GenECP\C47H42O5P2Pd1\SHIMGRP\13-Jan-202  
4\0\#P Geom=AllCheck Guess=TCheck SCRF=Check GenChk RB3LYP/GenECP Fre  
q\TS2\0,1\O,-1.2309442812,0.0180074795,2.5027240362\C,-2.2971585642,  
-0.8296087041,2.2763786401\C,-1.4114576602,1.3831111167,2.6365153048\C,



-1.9771877493,-2.0141663189,1.5918806468\C,-3.5911384004,-0.5542900118  
,2.7033493623\C,-4.5967719164,-1.4900135118,2.45557514\C,-2.9997494477  
,-2.9438374115,1.3748753478\C,-4.3025763627,-2.6870200911,1.8040883148  
\H,-2.7758703011,-3.8635516985,0.8459472833\H,-5.0861491415,-3.4145965  
448,1.618312856\H,-5.6120741562,-1.2764398539,2.774798437\H,-3.8076658  
765,0.3819646976,3.2046051718\C,-1.357162309,2.1996147562,1.4943880788  
\C,-1.522970354,1.9150940226,3.9174324349\C,-1.5943296768,3.2982986502  
,4.0832142271\C,-1.4354076539,3.5856322418,1.6864031531\C,-1.551666576  
1,4.1315692751,2.9655570486\H,-1.3907397747,4.2429048153,0.8262179831\  
H,-1.6033930476,5.2090107339,3.0858124216\H,-1.5336707811,1.2376367694  
,4.76465305\H,-1.6760451636,3.7195391771,5.0802126546\P,-0.3143416896,  
-2.1165359276,0.8240686945\P,-1.1493834497,1.39847302,-0.1569040215\C,  
0.8250588672,-2.2863994453,2.2563308638\C,-0.3276979631,-3.7830735025,  
0.0622638805\C,-2.8664948662,0.8141921372,-0.4736811077\C,-1.014396705  
6,2.8301708545,-1.3040129376\C,-3.9870467693,1.5449753307,-0.054464906  
7\C,-3.0540255312,-0.3842659451,-1.1714541649\C,-4.3408746285,-0.85239  
64663,-1.4375809647\C,-5.2719084719,1.0783560521,-0.321996551\C,-5.450  
7156632,-0.1234660789,-1.0112755012\H,-3.8507130515,2.474956685,0.4883  
029052\H,-2.1836217848,-0.9514342779,-1.4875545622\H,-4.4741568926,-1.  
7909203595,-1.966970561\H,-6.1341182242,1.6485993655,0.011261607\H,-6.  
4526995832,-0.4913731548,-1.2113243071\C,0.3723483412,-2.5818561689,3.  
5494257975\C,2.1903105425,-2.0474624312,2.0461985925\C,3.0872603233,-2  
.0896036074,3.1120786031\C,2.6292314866,-2.3759229217,4.3993047477\C,1  
.2720890359,-2.6274606539,4.6148784957\H,2.5435589519,-1.7962628218,1.  
0542594881\H,4.1332638509,-1.8631548565,2.9310747746\H,3.3245373939,-2  
.3964822986,5.2335212178\H,0.9114978899,-2.8514802847,5.6148095798\H,-  
0.6840017102,-2.7597032588,3.7243761527\C,-0.2031406547,-4.9589177168,  
0.8151473131\C,-0.4739545918,-3.8696897002,-1.3285921098\C,-0.51159767  
15,-5.1146718875,-1.9578040076\C,-0.2358273874,-6.2020768624,0.1848593  
897\C,-0.3932865256,-6.2814607221,-1.201293974\H,-0.0734621238,-4.8965  
019813,1.8911103353\H,-0.5305435787,-2.9546461884,-1.9115024579\H,-0.6  
188825272,-5.171991615,-3.0368663671\H,-0.1345187623,-7.1091244118,0.7  
734819141\H,-0.4142164016,-7.2508873098,-1.6902737399\C,0.0965288909,3  
.6844039975,-1.1977630418\C,-1.9346061981,3.0365451803,-2.3405508757\C  
, -1.7496915705,4.0780794887,-3.2519722555\C,0.2665579892,4.732162732,-  
2.1010408741\C,-0.6528078088,4.9306284074,-3.133816472\H,0.8281105116,  
3.5369645431,-0.4103247116\H,-2.796005735,2.3863340186,-2.4396428064\H  
, -2.4698211831,4.2230740006,-4.0520336337\H,1.1261084529,5.3881039866,  
-1.9990156216\H,-0.5130913934,5.7424102948,-3.8414674929\Pd,0.45651317  
94,-0.3159753101,-0.4589183629\C,3.3118026095,1.073037045,-0.416038073  
5\C,2.9240389653,1.5221056046,-1.8255538426\C,2.2750136301,0.326373693  
4,-1.2688577487\H,3.6811026375,1.3917078653,-2.5939768952\H,2.35577633  
11,2.4455811779,-1.8797094342\C,2.1300361652,-1.0417471125,-1.41422072  
01\C,2.6452633979,-2.181211318,-1.8600113259\H,2.1337912549,-3.1317972

251,-1.7465421618\H,3.6113456092,-2.1891405583,-2.3639675887\C,4.60637  
38718,0.3752477828,-0.1742696336\C,2.7474138736,1.800761193,0.77234206  
49\O,2.5130146112,0.9375340566,1.7677991646\O,5.1154917478,-0.14548306  
77,-1.3156650509\O,5.1435065647,0.2573579122,0.9112567518\O,2.48415640  
5,2.9892491151,0.8145370446\C,1.9643186759,1.4421024168,3.002565983\C,  
3.0855235797,1.7816514617,3.9682701799\H,1.344952135,0.6237763792,3.37  
28184869\H,1.3382099468,2.3086929101,2.7849676076\H,3.722137204,0.9083  
907106,4.1309212026\H,2.6677276786,2.097585741,4.9301206469\H,3.700178  
0528,2.5947700523,3.5732394428\C,6.3387905175,-0.8993543164,-1.1773960  
095\C,7.5519378387,0.0165427746,-1.1677128611\H,6.3449514181,-1.567214  
0221,-2.0417744417\H,6.2849587851,-1.4918035471,-0.2611651364\H,7.5727  
243866,0.6401637411,-2.0662827322\H,8.470553761,-0.5788637896,-1.13942  
20693\H,7.5308670708,0.6624401366,-0.2873488357\

### TS1'

1\1\GINC-OMC-1-818\Freq\RB3LYP\GenECP\C47H42O5P2Pd1\SHIMGRP\15-Feb-202

3\0\#p freq genecp b3lyp geom=check guess=read empiricaldispersion=gd  
3bj\TS2\0,1\O,-0.8282408794,-1.5657594334,1.4632650095\C,-1.22082639  
73,-2.6985840924,0.7836406803\C,-1.7306061836,-0.8154614045,2.19911368  
31\C,-0.412391179,-3.0291908575,-0.3170134501\C,-2.3137783983,-3.47890  
92203,1.1452794459\C,-2.6026607739,-4.6229838592,0.3995782595\C,-0.716  
0554227,-4.1857891388,-1.0413010452\C,-1.8051051986,-4.9830404715,-0.6  
857581955\H,-0.1041903844,-4.4523722955,-1.8960276547\H,-2.0325109244,  
-5.875549435,-1.2596534781\H,-3.4589864385,-5.2318646142,0.6728769845\  
H,-2.9347053781,-3.1872450987,1.9837701273\C,-2.2788940781,0.334133578  
4,1.611635564\C,-1.9834474778,-1.161196415,3.5234465976\C,-2.832527405  
3,-0.3623839209,4.2887839735\C,-3.1373344731,1.1141991206,2.3957136001  
\C,-3.4139033823,0.7704086792,3.7188913938\H,-3.5846841255,2.003903265  
5,1.9706786181\H,-4.0789333424,1.3955281082,4.3063536947\H,-1.50210997  
99,-2.0409685963,3.9370202952\H,-3.0343803085,-0.6236795946,5.32268177  
44\P,0.8667505205,-1.8148576732,-0.8039124613\P,-1.8185875458,0.734443  
5478,-0.1277740312\C,2.0883473639,-1.8923420698,0.5598895172\C,1.68160  
73432,-2.6295578619,-2.2311309788\C,-2.8472648154,-0.5175148565,-1.020  
7014379\C,-2.7375918629,2.2833251184,-0.5255057505\C,-4.0542205063,-0.  
9948078435,-0.4923025432\C,-2.4257193435,-0.9852752599,-2.2722489261\C  
, -3.1803855125,-1.9255534436,-2.9724033432\C,-4.8089350792,-1.93538165  
15,-1.190868127\C,-4.3711849301,-2.407993088,-2.4291109064\H,-4.398528  
5443,-0.6381824985,0.4723739947\H,-1.4923708598,-0.6132806586,-2.68418  
98101\H,-2.8325954014,-2.2872044221,-3.9355018453\H,-5.7369878388,-2.3  
046018883,-0.7643798139\H,-4.9550812934,-3.1488902319,-2.9669680843\C,  
2.2501660387,-3.0355896596,1.3560854476\C,2.8420436147,-0.7453510486,0.  
.8430062937\C,3.751002417,-0.7360960751,1.9007181999\C,3.9148355095,-1  
.8808976274,2.6813833928\C,3.1651678556,-3.0292019472,2.40812179\H,2.7  
061150328,0.1595157978,0.262872181\H,4.2864127367,0.1837570181,2.10779

38615\H,4.6167032872,-1.8782796729,3.5104609303\H,3.2863853237,-3.9176  
306425,3.0214192506\H,1.6488042952,-3.9190285925,1.1632906302\C,2.6536  
722007,-3.6282379059,-2.0864688111\C,1.313380498,-2.214202609,-3.51913  
88896\C,1.8945674353,-2.7977265222,-4.6446589476\C,3.2402097277,-4.205  
7535322,-3.2127899121\C,2.8599543698,-3.79479961,-4.4920569462\H,2.958  
3165929,-3.9431687024,-1.0939589903\H,0.5810510482,-1.419406844,-3.630  
6314284\H,1.6032350559,-2.4671001099,-5.6371942227\H,3.9971338852,-4.9  
749278056,-3.0913987576\H,3.320713695,-4.2441188236,-5.3666250927\C,-2  
.5525773714,3.4603261577,0.2215125415\C,-3.5764936866,2.3246936816,-1.  
6506726879\C,-4.2162502447,3.5087379092,-2.0174048402\C,-3.207619258,4  
.63637397,-0.1428171574\C,-4.0390302646,4.66807865,-1.2630402295\H,-1.  
8806536894,3.4453163361,1.0699484349\H,-3.7364118792,1.4324476066,-2.2  
43653619\H,-4.8598142622,3.5189564703,-2.8922144813\H,-3.057806892,5.5  
337734177,0.4505124341\H,-4.5423812533,5.587727925,-1.5461671655\Pd,0.  
3442573129,0.4778610329,-1.0585561825\C,1.718983064,3.0769694096,0.531  
5825194\C,0.8807225498,3.660951519,-0.5950480786\C,0.966280208,2.41307  
96233,-1.3774309978\H,1.3495414784,4.5122788873,-1.088103948\H,-0.1285  
968957,3.9005677554,-0.2710502334\C,1.7320782287,1.7442987993,-2.19633  
06674\C,2.7904413964,1.0671358058,-2.6625703178\H,2.6962966604,0.27755  
3119,-3.4026690393\H,3.7998474473,1.3029579097,-2.3207835175\C,3.16100  
34542,3.0330524917,0.3808525647\C,1.0202977632,2.427064072,1.609450228  
5\O,1.8094315876,1.8523340803,2.548766252\O,3.5629224374,3.780911078,-  
0.7080614031\O,3.9839524532,2.4271821202,1.0580807514\O,-0.2163006687,  
2.3748178101,1.700645627\C,1.1419081211,1.0374679913,3.5279969605\C,0.  
4987514456,1.8580446734,4.6354778426\H,1.9335049022,0.3923249941,3.916  
2931185\H,0.3992470175,0.4155880504,3.0270996004\H,1.2361625257,2.5114  
979022,5.1117735387\H,0.0837513327,1.1895375865,5.3979854936\H,-0.3110  
964734,2.4662817193,4.2301522462\C,4.9682240665,3.7646494221,-0.992124  
7587\C,5.7214148544,4.7809142085,-0.1459533676\H,5.039656903,4.0019040  
826,-2.0575991293\H,5.3589130415,2.7579473711,-0.8163524477\H,5.302809  
6671,5.7823640001,-0.284059615\H,6.7786084466,4.8050095865,-0.43203184  
95\H,5.6518582911,4.509689166,0.9094712697\

## TS1

1\1\GINC-A01R02N01\Freq\RB3LYP\GenECP\C47H42O5P2Pd1\ACJSGGHI7X\16-Jan-  
2024\0\#p freq genecp b3lyp empiricaldispersion=gd3bj geom=check gues  
s=read\TS2\0,1\O,-0.8229736393,-1.7111416299,1.4950736576\C,-0.88640  
77964,-2.6407964498,0.4755648702\C,-1.9818695212,-1.219448002,2.072341  
8305\C,0.2050977055,-2.642698761,-0.4100477452\C,-1.9431779859,-3.5350  
785032,0.339732945\C,-1.9129685799,-4.4664728635,-0.6985919699\C,0.220  
5721168,-3.6020012375,-1.4281759576\C,-0.82961997,-4.5092175936,-1.574  
9727808\H,1.0511471316,-3.6200621153,-2.1250357898\H,-0.8069671513,-5.  
2366018904,-2.3802258702\H,-2.7428509179,-5.1554241624,-0.8196362242\H  
, -2.7808935447,-3.4875699718,1.0258513063\C,-2.7074940006,-0.185697859

5,1.4513719885\C,-2.3384278946,-1.7194127299,3.3217416864\C,-3.4530876  
014,-1.2030499161,3.9818913359\C,-3.8287989464,0.3096208112,2.13370625  
62\C,-4.2009540862,-0.1904020813,3.3817041637\H,-4.4063144334,1.109619  
237,1.6853374683\H,-5.0721612498,0.217148004,3.8850685355\H,-1.7281373  
194,-2.5026584636,3.7588483384\H,-3.731788169,-1.5900242002,4.95698774  
31\P,1.3856064564,-1.2384459007,-0.2977069152\P,-2.1187788797,0.504918  
4883,-0.1589416401\C,2.3798140949,-1.6342917432,1.195067876\C,2.578279  
7177,-1.6031327247,-1.6494018406\C,-2.8275676818,-0.710662487,-1.34694  
55305\C,-3.2088658113,1.9670993105,-0.3886088984\C,-4.1037334608,-1.26  
62167226,-1.1757558489\C,-2.063607991,-1.0827896533,-2.4586673085\C,-2  
.565434115,-1.9961359137,-3.3864286596\C,-4.6054827541,-2.1764915087,-  
2.1031461502\C,-3.8360075655,-2.5431838963,-3.2104372689\H,-4.69896443  
27,-0.9888561293,-0.3112723191\H,-1.0661845838,-0.6676281604,-2.571376  
8004\H,-1.9575438275,-2.2900671929,-4.2367140041\H,-5.5940694795,-2.60  
37498047,-1.9614640669\H,-4.2245273296,-3.2590878387,-3.9288351569\C,2  
.1755176278,-2.7825950117,1.9703976293\C,3.3592936608,-0.7087416554,1.  
5832924976\C,4.1174068435,-0.9288243304,2.7311732394\C,3.9024317935,-2  
.0697507409,3.5083038407\C,2.9319388928,-2.996349896,3.1243862569\H,3.  
5011768927,0.2067003589,1.02181413\H,4.8614568033,-0.1951330471,3.0260  
841359\H,4.4858797277,-2.2342765243,4.4095892422\H,2.762096496,-3.8877  
251127,3.721690102\H,1.4245982386,-3.5075976015,1.6756069935\C,3.53839  
61817,-2.6213878808,-1.5545131101\C,2.5311776229,-0.8130462677,-2.8048  
776748\C,3.4208829677,-1.0430119197,-3.8552088135\C,4.4299180988,-2.84  
71962121,-2.6023589175\C,4.3714915809,-2.0595398625,-3.7553242828\H,3.  
5894490426,-3.2285439174,-0.6560941174\H,1.8124054822,-0.0010893941,-2  
.8621729605\H,3.3791252853,-0.4189526915,-4.7434050034\H,5.1732204674,  
-3.6347775788,-2.5189220737\H,5.0705559464,-2.2341184605,-4.5679962662  
\C,-3.0442847363,3.0534119217,0.4896016045\C,-4.1024581869,2.089439563  
9,-1.4603496306\C,-4.8242110648,3.2709813897,-1.646931268\C,-3.7792270  
693,4.2222955036,0.3086532339\C,-4.6698897855,4.3373854951,-0.76262918  
74\H,-2.3325645231,2.9811727315,1.3061008548\H,-4.2385125156,1.2642747  
612,-2.1499909109\H,-5.5113253417,3.3522025445,-2.4843526794\H,-3.6484  
398048,5.0494141056,1.0006548367\H,-5.234720401,5.2535414579,-0.907602  
2405\Pd,0.2098988911,0.7959846016,-0.391668532\C,1.2556548199,2.954366  
4137,0.4921892276\C,0.3912678274,4.0546214071,-0.1206284189\C,0.339271  
3342,2.893340764,-0.9968900067\H,0.913677661,4.9261303016,-0.507346893  
1\H,-0.4812512575,4.2724865311,0.4884386535\C,0.57775288,2.6177081341,  
-2.2482733821\C,0.8201959143,2.3652298902,-3.5167343416\H,0.1195229975  
,1.8120652476,-4.1398390409\H,1.7351095261,2.714650432,-3.9957216118\C  
,2.7286796011,2.9535791377,0.277538875\C,0.6765338687,2.3841935731,1.7  
695878479\O,1.3912117047,1.3797235105,2.2927610864\O,3.062806083,3.613  
7417682,-0.8594342343\O,3.557944332,2.4454450697,1.0098591428\O,-0.342  
5287344,2.8259094929,2.2824843268\C,0.8352684807,0.7028405336,3.445127  
0574\C,1.3641483779,1.3215526215,4.7259375123\H,1.1625911419,-0.330425

5724,3.328975509\H,-0.2532511401,0.7500628708,3.3901371245\H,2.4572694  
617,1.2968341393,4.7362778338\H,0.9958057021,0.7595249037,5.5907808783  
\H,1.0308729796,2.3583220967,4.8201636736\C,4.4344231107,3.4712684816,  
-1.2870513691\C,4.6315417225,2.1486389338,-2.0126763726\H,5.0901956459  
,3.5488136339,-0.4171404841\H,4.6032653879,4.3242310685,-1.9480478517\  
H,4.4429934848,1.3070383536,-1.3423567835\H,5.6595499801,2.070139046,-  
2.3813132758\H,3.9491444882,2.0654921417,-2.8624198673\

### Int1'

1\1\GINC-OMC-1-815\Freq\RB3LYP\GenECP\C47H42O5P2Pd1\SHIMGRP\07-Mar-202  
3\0\#P Geom=AllCheck Guess=TChech SCRF=Check GenChk RB3LYP/GenECP Fre  
q\int1\0,1\O,-0.8410488154,-2.0588052001,1.6055845346\C,-0.894780721  
1,-2.7906253993,0.4351166532\C,-2.0086901214,-1.5882125279,2.171126754  
7\C,0.1943484848,-2.6002677202,-0.4237192759\C,-1.9259965198,-3.674786  
9689,0.1394538681\C,-1.8654625758,-4.3974398771,-1.0526827255\C,0.2483  
226875,-3.3564967083,-1.5985765789\C,-0.7785704711,-4.2478538595,-1.91  
40151457\H,1.0824783149,-3.2265120048,-2.2782093858\H,-0.7348633749,-4  
.8152234318,-2.8380441082\H,-2.6741526565,-5.0750236219,-1.3064292173\  
H,-2.7639340542,-3.777482646,0.8195615852\C,-2.7130486425,-0.523825744  
1,1.5847234068\C,-2.4063381567,-2.1614737726,3.3760582027\C,-3.5442999  
128,-1.68677896,4.0252893531\C,-3.8581350742,-0.0675090557,2.258722908  
9\C,-4.2740869328,-0.6422491083,3.4594691398\H,-4.4225700092,0.7576506  
199,1.8428654503\H,-5.1624075908,-0.2632780869,3.9545817554\H,-1.80753  
84091,-2.9679111491,3.7852142518\H,-3.8555108526,-2.1306569604,4.96564  
98451\p,1.3380698512,-1.2303833212,0.0069065778\p,-2.1506544821,0.2738  
696276,0.0078338385\C,2.3295158413,-1.9031477719,1.3979423644\C,2.4867  
098339,-1.2722893307,-1.4250984329\C,-2.9073041124,-0.7808855109,-1.28  
39432601\C,-3.1712478282,1.7991228361,0.048350965\C,-4.1353303543,-1.4  
316759535,-1.0998443134\C,-2.2251244331,-0.926857176,-2.4972826378\C,-  
2.7661543258,-1.7098427733,-3.5161170735\C,-4.6761086434,-2.2100133938  
, -2.1213083714\C,-3.9916163156,-2.3500940635,-3.3307717855\H,-4.659615  
8092,-1.3375307442,-0.1541743179\H,-1.2716843353,-0.4278293573,-2.6314  
296559\H,-2.2260138939,-1.8250507472,-4.4508000926\H,-5.6277069929,-2.  
7116071168,-1.9719768544\H,-4.4105467066,-2.9623358214,-4.1238328235\C  
,2.0910965575,-3.177292254,1.9305406216\C,3.3544913389,-1.1089128846,1  
.9360638008\C,4.1191775591,-1.5915195017,2.9983304271\C,3.8701415875,-  
2.8555714921,3.5364156144\C,2.8561301605,-3.6481073337,2.9976293215\H,  
3.5510811438,-0.1267370168,1.5213290306\H,4.913092233,-0.971966072,3.4  
053762411\H,4.4656568791,-3.22327751,4.3670998082\H,2.6610947246,-4.63  
67317301,3.4031413374\H,1.3151109627,-3.8072712677,1.5113808776\C,3.67  
95601855,-2.0046062805,-1.4182859931\C,2.103833984,-0.595116839,-2.593  
3854264\C,2.8864886526,-0.6744763971,-3.7436674118\C,4.4706755043,-2.0  
678365151,-2.566064534\C,4.0722537595,-1.4116364039,-3.732153694\H,3.9  
883923437,-2.5212720287,-0.5163631508\H,1.1990791175,0.0067621232,-2.5

90799087\H,2.5796646391,-0.1446749077,-4.6404606852\H,5.3972974035,-2.6338436474,-2.5495068277\H,4.6881065198,-1.4665221888,-4.6249392794\C,-2.697871398,2.8689476003,0.8250826828\C,-4.3891365442,1.9183867704,-0.6272560434\C,-5.1366777839,3.0944969104,-0.5206583304\C,-3.4526633388,4.0332763193,0.9356349172\C,-4.6724487748,4.15010206,0.2625558574\H,-1.7288759168,2.8089668655,1.3138472656\H,-4.7526274049,1.1029722667,-1.2420358839\H,-6.0776777232,3.1830699029,-1.0556453684\H,-3.0767547404,4.8571566757,1.5343758308\H,-5.2528284071,5.0645601986,0.3421760549\Pd,0.1179078015,0.8481265191,-0.2414383503\C,1.663703546,2.3949444879,0.0297141968\C,0.8371185326,3.4143929429,-0.7829570655\C,-0.2978819275,2.5668330084,-1.2581134189\H,1.4104881085,3.8563230268,-1.5994679338\H,0.48271552,4.2072349499,-0.1170356049\C,-1.1491477567,2.6294945118,-2.2256048645\C,-2.0770884367,2.653935268,-3.162384686\H,-3.0549567438,3.0899468282,-2.9721307661\H,-1.9020051603,2.2487942929,-4.1568300731\C,2.9757770999,1.9789817051,-0.4904197818\C,1.4160850135,2.480116408,1.4899542739\O,2.2213704004,1.7006148368,2.247984925\O,3.1384048354,2.3647697703,-1.7916617512\O,3.8528576567,1.3564761048,0.093159121\O,0.5273529385,3.1684738946,1.9902408559\C,1.926474486,1.6457754332,3.6566705037\C,2.5682996254,2.8052366791,4.4019286696\H,2.3376906691,0.6853744241,3.9759763783\H,0.8422211449,1.6416413614,3.7942136406\H,3.6459970978,2.8310130989,4.2149454854\H,2.4064330339,2.6961346555,5.4798373066\H,2.1296030191,3.7515063859,4.0782942468\C,4.3997659242,2.0203937689,-2.3952603631\C,5.4717549525,3.0407176486,-2.0452886148\H,4.1941674428,2.0065242737,-3.4679120014\H,4.6885010493,1.0184921413,-2.0739993527\H,5.1556577011,4.0488904535,-2.3298448146\H,6.4012043258,2.8074515217,-2.5759875894\H,5.6729979861,3.0219489772,-0.9719299441\

### Int1

1\1\GINC-OMC-1-806\Freq\RB3LYP\GenECP\C47H42O5P2Pd1\SHIMGRP\07-Mar-2023\0\#P Geom=AllCheck Guess=TChef SCRF=Check GenChk RB3LYP/GenECP Freq\int1\0,1\O,2.0037238451,-2.3360275582,-0.6650990547\C,3.2919619844,-1.8671028367,-0.8578036782\C,1.6786965165,-2.6791301662,0.6490655963\C,3.6161541628,-0.5479296665,-0.4934372241\C,4.2365485296,-2.7182837637,-1.4232507358\C,5.5513186663,-2.278972503,-1.5822818439\C,4.9502229869,-0.1384758787,-0.635022182\C,5.912621399,-0.9974199781,-1.1656366538\H,5.2298675062,0.8687473346,-0.3491106116\H,6.9386047169,-0.6587149017,-1.2665347686\H,6.2917636558,-2.9427092192,-2.0172415575\H,3.9302995703,-3.7174594873,-1.7136737569\C,0.4205408008,-2.3030484893,1.1400036369\C,2.590909561,-3.3939523647,1.4243097879\C,2.2701314824,-3.722263188,2.7383533868\C,0.1342865646,-2.6325998209,2.4746639956\C,1.0431100319,-3.3291563018,3.2675295298\H,-0.8096051085,-2.323868999,2.902232865\H,0.7891895076,-3.5582851242,4.2972374129\H,3.5480773956,-3.6741633383,1.0007359634\H,2.9825992972,-4.274138901,3.3436342912\P,2.26619381,0.605612515,-0.0338803622\P,-0.7678208373,-1.3109806848,0.1214574025\

C,2.0072781825,0.4819919723,1.7651150983\C,3.0091826767,2.2680183473,-  
0.2688774113\C,-1.4359880861,-2.4916975566,-1.1187369304\C,-2.16769199  
5,-1.1456193401,1.284495813\C,-0.7300186264,-3.6048178228,-1.587784446  
\C,-2.7036633305,-2.2020540082,-1.6501043347\C,-3.2486077825,-3.016889  
7095,-2.6391435145\C,-1.2823328015,-4.4152261754,-2.5820473824\C,-2.53  
87744164,-4.1234433727,-3.1119964432\H,0.247181575,-3.8435312748,-1.18  
92118231\H,-3.2740123266,-1.356755465,-1.2787845259\H,-4.2337205262,-2  
.7867535696,-3.0335258366\H,-0.728169694,-5.2793192563,-2.9370558942\H  
,-2.9656665345,-4.7573766238,-3.8834774314\C,2.8994058627,-0.183154079  
8,2.6119620901\C,0.8465558464,1.0745081104,2.288086777\C,0.581532842,0  
.9858759503,3.6532423473\C,1.4633483569,0.3056794662,4.4955564355\C,2.  
6208728311,-0.2753152353,3.9750383919\H,0.1503960521,1.6015038942,1.63  
95303102\H,-0.3242442898,1.4343063914,4.0477032196\H,1.2460168497,0.22  
36624752,5.5562559975\H,3.3032189472,-0.8111702898,4.6275489997\H,3.79  
10483295,-0.6479773436,2.205708512\C,2.9167863435,3.2475195718,0.72745  
83427\C,3.5817290498,2.6074173812,-1.5063990214\C,4.0443217222,3.89931  
80266,-1.7412396208\C,3.3715387346,4.5449625936,0.4845383801\C,3.93112  
35062,4.8759149728,-0.7480788535\H,2.4771676533,3.0064276894,1.6875860  
008\H,3.6763022059,1.8562728694,-2.2828789537\H,4.486938554,4.14565967  
01,-2.7015383959\H,3.282316985,5.295837692,1.2632501483\H,4.2795474243  
,5.8866080746,-0.9361047606\C,-2.4146476511,0.0586847483,1.9441031893\  
C,-2.9370724604,-2.284378883,1.595149698\C,-3.9177194933,-2.2164085924  
,2.5785477025\C,-3.4059743249,0.11928547,2.9278471222\C,-4.1443703289,  
-1.0131357354,3.2573868354\H,-1.9143760875,0.9753890639,1.6531146306\H  
,-2.7583248894,-3.2186618676,1.0737089619\H,-4.5075195194,-3.097617248  
,2.8134875053\H,-3.6230022325,1.0751359402,3.3897301631\H,-4.916943392  
5,-0.9580422396,4.0188138022\Pd,0.3284541518,0.3099659693,-1.222957389  
7\C,-2.934880557,1.728917829,-0.9757100723\C,-2.8009289528,1.257518174  
9,-2.4133125017\C,-1.4196378036,0.8673999562,-2.7375095307\H,-3.049709  
6058,2.0438692077,-3.1451023228\H,-3.4928913665,0.4339212066,-2.585872  
8817\C,-0.2804783187,0.9531981559,-3.235204544\C,1.0963894868,1.142721  
4452,-3.0681011868\H,1.8063939503,0.4953083103,-3.5800666903\H,1.42696  
09856,2.1687953996,-2.9253341377\C,-1.9819589958,2.6356019116,-0.42736  
3808\C,-4.0730557766,1.3420122496,-0.2059408754\O,-4.7626205883,0.2663  
268515,-0.7926759218\O,-1.2488219806,3.2843742479,-1.4221969744\O,-1.7  
078868574,2.8598934313,0.7617555537\O,-4.4900617928,1.8261040287,0.841  
1510916\C,-5.925465539,-0.1735836848,-0.0884516152\C,-6.2559604978,-1.  
574616846,-0.573205654\H,-6.7553764472,0.5193287353,-0.2801493076\H,-5  
.7284750538,-0.1563722542,0.9854292524\H,-6.4108880349,-1.5898822489,-  
1.657209477\H,-7.1709910329,-1.9365939765,-0.0923567295\H,-5.443989736  
3,-2.2664475415,-0.3310814488\C,-0.1315373668,4.0551735004,-0.97596563  
27\C,-0.5360683447,5.4597626387,-0.5542832728\H,0.5581384809,4.0853574  
729,-1.8261808399\H,0.3575126632,3.5421133112,-0.1460658952\H,-1.04885  
18995,5.9774592203,-1.3708509721\H,0.3518532314,6.0405343924,-0.278140

3004\H,-1.2056801871,5.4048475456,0.3061817509\

**Int2'**

I\1\GINC-A04R04N06\Freq\RB3LYP\GenECP\C68H68O6P2Pd1\ACJSGGHI7X\09-Jan-

2024\0\#P Geom=AllCheck Guess=TChech SCRF=Check GenChk RB3LYP/GenECP

Freq\|tBu\0,1\C,-1.9582669837,1.0082171504,3.6461542392\C,-2.28555708  
96,-0.4428479238,3.6792377481\C,-1.2723914376,-1.3391582236,3.59320999  
7\C,0.1193560424,-0.9584371972,3.5001068092\C,0.4269688996,0.452896844  
,3.4909820377\C,-0.5281541061,1.4134425049,3.5654036102\H,-1.476649646  
3,-2.4034132094,3.5800237905\H,1.4621428831,0.7258674613,3.3524532933\  
C,-0.1862416857,2.9062731325,3.4864485738\C,-3.7567178705,-0.870493055  
6,3.7383663687\C,-0.7383046203,3.6428483718,4.727496648\H,-1.822073287  
6,3.5505079708,4.7852040354\H,-0.4747662538,4.7055790416,4.6762284935\  
H,-0.3008360822,3.231614063,5.6442091751\C,-0.7893097857,3.5077158941,  
2.1957339881\H,-1.8721964454,3.3846864399,2.1756386595\H,-0.3559399535  
,3.0178025839,1.3187357892\H,-0.5575462408,4.5781126948,2.139737024\C,  
1.3335974169,3.1360767274,3.4349026464\H,1.840492529,2.728942313,4.316  
5542916\H,1.5354386513,4.2116070109,3.4024760667\H,1.7749423408,2.6854  
161825,2.5424142336\C,-4.4646060782,-0.4225273786,2.4381311315\H,-4.40  
0037942,0.6587211511,2.313341566\H,-5.522310463,-0.7100872951,2.468710  
7668\H,-4.0010079987,-0.9106067795,1.5747150229\C,-4.4525999452,-0.244  
1781251,4.9677009737\H,-4.4281809561,0.843254537,4.9190835503\H,-3.959  
6052894,-0.5658988137,5.8919218464\H,-5.4964820279,-0.5755267669,5.010  
7495595\C,-3.8998596485,-2.3978271443,3.8494432052\H,-3.4791353584,-2.  
909589576,2.9804646704\H,-4.9616418233,-2.6581836175,3.9052322762\H,-3  
.4133157956,-2.7879753269,4.7498205347\O,-2.860836563,1.8622491203,3.6  
421519468\C,1.057895597,-1.9357874778,3.3193291115\C,2.5039320866,-1.7  
709345477,3.189721382\H,0.6867079471,-2.9422412399,3.1498607299\C,3.25  
42507976,-0.9552041336,4.0556077403\C,4.6346661643,-0.8425843084,3.903  
1513442\C,5.2858417745,-1.5418533539,2.8853571833\C,3.1711652182,-2.48  
07654885,2.1732068795\C,4.5485814723,-2.3572569851,2.0218136308\H,2.75  
25876946,-0.437113863,4.8664372329\H,2.5750541074,-3.0619451956,1.4782  
52318\H,5.0493892174,-2.8910368769,1.2194017909\H,5.2027688364,-0.2160  
967487,4.5846262711\H,6.3618350039,-1.4527514048,2.7663728179\O,-0.919  
8322319,1.0889184947,-5.8688708852\C,-0.1524617195,2.1329853482,-6.358  
4114735\C,-0.5885501661,-0.1805445185,-6.3464398494\C,1.1399729248,2.3  
478926473,-5.8469650746\C,-0.6915108522,2.9572850842,-7.3412668425\C,0  
.0828950436,3.9878274932,-7.8756462394\C,1.909961979,3.371061861,-6.41  
89801434\C,1.3913556396,4.1791514677,-7.430723391\H,2.913561481,3.5495  
145931,-6.0506811444\H,2.0044860672,4.9657658149,-7.8582717063\H,-0.33  
27154991,4.6290009852,-8.6464147089\H,-1.7032717947,2.7685244622,-7.68  
35966931\C,-0.5681263116,-1.2486221274,-5.4375805139\C,-0.3075292635,-  
0.3578831466,-7.7005790627\C,0.038586314,-1.6200201978,-8.174164877\C,  
-0.1958874857,-2.5049259746,-5.9428350217\C,0.1063659417,-2.6933243607



,-7.2892588116\H,-0.126259223,-3.345398624,-5.2664429433\H,0.397356556  
3,-3.6781253496,-7.6396003279\H,-0.3464603054,0.4934464856,-8.36973093  
35\H,0.2621012237,-1.7561122653,-9.2277274705\H,1.6706534165,1.4169419  
001,-4.3597855618\H,-0.8934097745,-0.9994363978,-3.6293505401\C,2.4655  
676595,-0.124749295,-4.9169251644\C,3.0486488906,2.4158831733,-3.67220  
55749\C,-2.7096875405,-0.755673949,-3.4895460833\C,-0.6800956205,-2.70  
18370531,-2.9965214518\C,-3.4808593947,-0.1406447537,-4.4823497052\C,-  
3.3146125217,-1.1331482196,-2.2793393172\C,-4.6692458,-0.8886094349,-2  
.0676140095\C,-4.8391064377,0.0984545868,-4.2636729066\C,-5.435590105,  
-0.2691181755,-3.0575774828\H,-3.03103775,0.1622527231,-5.4188004468\H  
,-2.7345533057,-1.6249390309,-1.5063371187\H,-5.1216353571,-1.18445756  
14,-1.125858407\H,-5.4304325983,0.5730695616,-5.0413442658\H,-6.491296  
3008,-0.077552169,-2.8908044657\C,2.8083464566,-0.3584150045,-6.252245  
7606\C,2.7085801694,-1.108063017,-3.944373712\C,3.2814411991,-2.322075  
3038,-4.3176710635\C,3.606510304,-2.5617786017,-5.6543560337\C,3.37201  
99034,-1.580095361,-6.6183870517\H,2.4516012785,-0.9306567441,-2.90285  
06797\H,3.4526388955,-3.0831141588,-3.5635380978\H,4.0370931153,-3.515  
0836885,-5.9455642714\H,3.6170366309,-1.768093495,-7.6590871959\H,2.61  
23837445,0.3980377127,-7.0041953892\C,4.2619823623,1.8185060219,-3.308  
8405433\C,2.8472065449,3.7770668314,-3.3870450981\C,3.835628396,4.5189  
765062,-2.7462700434\C,5.2465808188,2.5632019105,-2.6567503331\C,5.035  
9930337,3.9105067313,-2.3696127347\H,4.4361925234,0.7701570692,-3.5180  
026241\H,1.9192973608,4.2589857288,-3.6749868874\H,3.6661929037,5.5701  
488561,-2.5341096017\H,6.1769121884,2.0826707043,-2.3709623459\H,5.800  
6228349,4.485895037,-1.8573349305\C,0.4585425638,-3.0613505377,-2.2741  
841009\C,-1.6314897384,-3.6838742578,-3.3347410622\C,-1.4202744991,-5.  
0124176343,-2.9814048922\C,0.661562888,-4.3980265098,-1.9200998313\C,-  
0.2618488524,-5.3739011082,-2.2839108188\H,1.1521669008,-2.3134859689,  
-1.9074531803\H,-2.5265562618,-3.4059230848,-3.8809323383\H,-2.1576109  
796,-5.7644966899,-3.2461235831\H,1.5252891597,-4.6536129192,-1.317481  
3809\H,-0.1002439538,-6.4103337236,-2.0022593168\H,-0.0086402759,1.05  
2407364,-2.8402069269\C,-0.2291303727,-0.8317487829,0.1876594679\C,-1.  
3400243524,0.200577107,0.2305377053\C,-1.1891813036,1.2149908537,-0.82  
09074204\H,-1.346811297,0.7706959805,1.1692056524\H,-2.3054907221,-0.2  
953121875,0.1596590764\C,-0.9181376678,2.329888843,-1.3109865536\C,-0.  
1178469492,3.1125790964,-2.1469517395\H,-0.573072122,3.7951713275,-2.8  
62304242\H,0.8367199662,3.4370155982,-1.7399088429\C,1.1254115466,-0.4  
190132198,-0.0159751314\C,-0.5135470073,-2.1986574427,0.4371386377\O,-  
1.8830443733,-2.4837695331,0.3901098982\O,1.3285840049,0.9081804524,0.  
3310091578\O,2.0667428743,-1.0689284249,-0.4958378314\O,0.2745129812,-  
3.1117498167,0.7088801107\C,-2.2338032539,-3.8527745844,0.6075983517\C  
,-3.6786941244,-4.028754441,0.1759967099\H,-2.1009183312,-4.1036186932  
,1.667722169\H,-1.5634421663,-4.4978687633,0.0365631553\H,-4.341877423  
2,-3.3605830381,0.7339106423\H,-4.0027136346,-5.0593793006,0.354613257

3\H,-3.7892171816,-3.8141967824,-0.8908957818\C,2.5642241951,1.4941864  
214,-0.0981212927\C,3.7296082942,1.1598815089,0.8196726553\H,2.3706520  
294,2.5716532309,-0.1102440231\H,2.7830724174,1.1668435681,-1.11655897  
13\H,3.5302128407,1.4732572602,1.8478485204\H,4.6309838274,1.678686879  
5,0.472685223\H,3.9128864686,0.0860384921,0.8161639025\

## Int 2

1\1\GINC-A04R03N08\Freq\RB3LYP\GenECP\C68H68O6P2Pd1\ACJSGGHI7X\10-Jan-  
2024\0\#P Geom=AllCheck Guess=TCheck SCRF=Check GenChk RB3LYP/GenECP  
Freq\Bu\0,1\C,-5.1983731279,2.5721575665,0.181354682\C,-4.457479831  
4,2.6229655241,-1.1077340528\C,-4.1838036025,1.4571712133,-1.740111847  
5\C,-4.5397885523,0.1619915782,-1.1978917942\C,-5.085765505,0.12372253  
72,0.1427863101\C,-5.3680587951,1.2477804475,0.8454454032\H,-3.6537058  
081,1.4507145825,-2.6839174823\H,-5.1887109764,-0.8497899084,0.6002318  
776\C,-5.8333181665,1.2126617185,2.3044067645\C,-4.0061078896,3.981040  
4351,-1.6522261185\C,-7.2836712416,1.7360087184,2.4073115074\H,-7.3508  
999538,2.7607633126,2.0432999504\H,-7.6169978324,1.7066360649,3.451051  
8711\H,-7.9611026672,1.1078397834,1.8183198864\C,-4.8944885969,2.08662  
93485,3.1692465307\H,-4.9231619198,3.1285348757,2.8528877453\H,-3.8612  
179062,1.7286697073,3.1015725544\H,-5.2025668575,2.0306118424,4.219185  
1914\C,-5.7887977267,-0.2150958772,2.8737669623\H,-6.4640786895,-0.893  
7166968,2.3414394613\H,-6.1027264258,-0.1969093652,3.9219810713\H,-4.7  
765818523,-0.6282276265,2.8313526962\C,-3.1563510805,4.6995580274,-0.5  
771151762\H,-3.7440617225,4.8969376551,0.3188713181\H,-2.7920880908,5.  
6549064511,-0.9715235591\H,-2.2844547146,4.0986320336,-0.3004844469\C,  
-5.2325533671,4.8464284027,-2.0166058524\H,-5.8597735843,5.0166982715,  
-1.1419760202\H,-5.8332424671,4.3554532498,-2.7902074703\H,-4.90143856  
04,5.8145076963,-2.4101207257\C,-3.1353712677,3.8137670268,-2.91012217  
74\H,-2.2612524804,3.1841790381,-2.7178184319\H,-2.789293618,4.7985256  
759,-3.2415030406\H,-3.6981272174,3.3732946368,-3.7404016663\O,-5.6335  
213205,3.6059612434,0.7078506336\C,-4.2542205573,-0.955992351,-1.93218  
39827\C,-4.610303635,-2.3424439776,-1.6517860917\H,-3.6783202125,-0.80  
22516405,-2.8411254029\C,-5.8520355372,-2.7039605336,-1.094795545\C,-6  
.1664458984,-4.041998546,-0.8731914567\C,-5.250184949,-5.0428486641,-1  
.20373548\C,-3.703604535,-3.3629292977,-1.9984739796\C,-4.0181903354,-  
4.6976229594,-1.7655641468\H,-6.5792737981,-1.9311380447,-0.8711368112  
\H,-2.7316107944,-3.0885549727,-2.3914478922\H,-3.2969961847,-5.470430  
7802,-2.0133309424\H,-7.1314400615,-4.3050401569,-0.4505460364\H,-5.49  
61975151,-6.0857272245,-1.027862314\O,4.0388886032,-0.7330485541,-1.24  
39195437\C,4.5834374452,-0.9710634349,0.0032395135\C,4.3105637553,0.45  
76743926,-1.8867831668\C,3.7705696104,-1.7199413074,0.8621306206\C,5.8  
502525743,-0.535210956,0.3742873057\C,6.3241376676,-0.8635311032,1.645  
0137093\C,4.2777737199,-2.0622680952,2.1193956608\C,5.5468523857,-1.63  
26549799,2.5109805069\H,3.6672341586,-2.6430066652,2.8008515679\H,5.92

19184176,-1.8881859931,3.4966838369\H,7.3024746013,-0.5118703546,1.955  
91572\H,6.4403558507,0.0629725688,-0.3106620856\C,3.7376125374,1.66065  
56134,-1.4426679976\C,5.1108987219,0.3960947513,-3.0245174757\C,5.3760  
41708,1.5577476097,-3.746919086\C,4.0262196971,2.8171584008,-2.1868417  
8\C,4.8379418942,2.7709891872,-3.3199516785\H,3.5980139772,3.763400308  
2,-1.8813188283\H,5.0380265972,3.683774931,-3.8718673209\H,5.507233298  
8,-0.5680981874,-3.3238345905\H,5.9985607733,1.512682144,-4.6349387955  
\P,2.0475248482,-2.0095535088,0.2987347787\P,2.6226296652,1.7330591131  
,0.0391643473\C,2.2227685761,-3.3216095663,-0.9754327685\C,1.352851983  
4,-2.8769183931,1.7600857331\C,3.7917014176,1.9216849139,1.4354166586\  
C,1.893107681,3.3972959353,-0.2120751543\C,5.0072427945,2.6087310317,1  
.3091968932\C,3.4399739577,1.3644692835,2.670119525\C,4.2903818836,1.4  
967660052,3.766982861\C,5.8534986825,2.7430895337,2.4079404495\C,5.495  
7536671,2.1870155093,3.6383154558\H,5.2936935205,3.0275554308,0.349777  
3754\H,2.5019209872,0.8279139871,2.7605498728\H,4.0135908098,1.0543420  
115,4.718972012\H,6.7935667811,3.2766662052,2.3033552601\H,6.158690569  
2,2.2871665495,4.4925510884\C,3.4712883362,-3.8600816278,-1.3153899904  
\C,1.069209337,-3.7886358984,-1.6248882305\C,1.1764240908,-4.777146033  
6,-2.6032836779\C,2.4229430883,-5.3022614139,-2.9493686381\C,3.5694617  
506,-4.8428259786,-2.3005088805\H,0.1010122295,-3.3860549127,-1.351143  
5433\H,0.2778222501,-5.1369869334,-3.0967555009\H,2.5005601845,-6.0679  
47884,-3.7158581812\H,4.542850863,-5.2513299661,-2.5562569657\H,4.3676  
332116,-3.5194625583,-0.8098587609\C,1.3408291548,-4.2711199949,1.8790  
292508\C,0.8908669383,-2.0923667363,2.8286110961\C,0.4542566161,-2.692  
892727,4.0079065927\C,0.8868768369,-4.8706991282,3.0547008581\C,0.4528  
959933,-4.0844655452,4.1237579485\H,1.6845459624,-4.8842509416,1.05319  
49407\H,0.8609770422,-1.0108894489,2.725241113\H,0.0973139903,-2.07482  
69523,4.8261745759\H,0.8763556685,-5.9535142591,3.1363405545\H,0.10464  
37234,-4.5544070652,5.0386669269\C,0.8478930886,3.5051473618,-1.143516  
0688\C,2.3648156776,4.5413251071,0.4376101265\C,1.8043169532,5.7894731  
221,0.151191021\C,0.3094885537,4.7539075439,-1.4396666851\C,0.78298152  
07,5.8981745762,-0.7908527751\H,0.4351266935,2.615302718,-1.6113200119  
\H,3.1610063646,4.4627124986,1.1687594872\H,2.1676331679,6.6725820786,  
0.6684664399\H,-0.4967782114,4.8293190247,-2.1601532481\H,0.347694227,  
6.8678443467,-1.0130936816\Pd,0.9142869122,0.1324077585,0.2670697831\C  
, -1.2020214168,-0.3872746108,-0.1431533054\C,-1.6749900946,0.905907712  
5,0.5492266207\C,-0.3953618324,1.4692848995,1.0730454961\H,-2.40756879  
09,0.7089820986,1.3313633856\H,-2.121138444,1.5754811697,-0.1867893657  
\C,-0.0850898747,2.3204777454,1.9919020429\C,0.2891163846,3.2117029713  
,2.8886466827\H,0.4272915412,4.2556365333,2.6179496498\H,0.4617289842,  
2.9437512386,3.928826481\C,-1.5723909767,-1.6869175584,0.4394795\C,-1.  
0126385408,-0.2338033252,-1.6007600659\O,-0.7870341383,-1.387831201,-2  
.2835845701\O,-2.1957066583,-1.5448782157,1.6443673868\O,-1.3554239059  
, -2.7998783222,-0.0231063443\O,-1.0250698617,0.8508671265,-2.184973137

4\C,-0.3319346004,-1.247339458,-3.6449338182\C,-1.4835813188,-1.081915  
2439,-4.6238859914\H,0.2238477197,-2.1686811396,-3.8331810068\H,0.3515  
55014,-0.3966107249,-3.7024344558\H,-2.1932516007,-1.9107705661,-4.538  
4214335\H,-1.1014654122,-1.0682231206,-5.6502965589\H,-2.0059869551,-0  
.1410621644,-4.4391349338\C,-2.491738196,-2.7720534883,2.3472396586\C,  
-3.774491833,-3.4225147177,1.8590836473\H,-2.5673004773,-2.466556946,3  
.3934540145\H,-1.6480204244,-3.45324706,2.2343698944\H,-4.6265735285,-  
2.7455867718,1.9517544504\H,-3.9833977826,-4.3137749532,2.4614007269\H  
,-3.6754395846,-3.7267053971,0.8179715211\

## TS2'

1\1\GINC-A02R05N06\Freq\RB3LYP\GenECP\C68H68O6P2Pd1\ACJSGGHI7X\10-Jan-

2024\0\#p freq genecp b3lyp empiricaldispersion=gd3bj geom=check gues  
s=read\TS2\0,1\O,-3.4465156984,-1.5560951024,1.9761469723\C,-4.30851  
5818,-0.5110271853,2.2741808988\C,-3.8670954231,-2.4549642409,0.999580  
7751\C,-4.3887750011,0.6000309516,1.416268143\C,-5.0528850579,-0.58479  
14474,3.446957581\C,-5.9350451497,0.4470284396,3.7692219249\C,-5.29778  
60897,1.6147738131,1.7512532176\C,-6.0692727712,1.5378170366,2.9110156  
939\H,-5.3850706204,2.4809550588,1.1063441442\H,-6.7632126762,2.337741  
9585,3.1477136296\H,-6.5182984818,0.3918194606,4.6827610018\H,-4.93465  
70317,-1.4534199125,4.0857857787\C,-2.9231364239,-2.8699724309,0.04970  
71104\C,-5.1787921461,-2.9228802026,0.9887144793\C,-5.5831308353,-3.80  
38139989,-0.0106648745\C,-3.3655773188,-3.7337769794,-0.9610376562\C,-  
4.6792195947,-4.1971846164,-0.9954678825\H,-2.6838931634,-4.0267550269  
, -1.747953989\H,-4.9934456392,-4.8581892281,-1.7963447672\H,-5.8742979  
54,-2.5807876449,1.746184487\H,-6.6058316056,-4.167175569,-0.024982237  
9\P,-3.2246417209,0.7664663296,-0.0001419733\P,-1.2006211968,-2.207579  
0346,0.1468764554\C,-3.9583875887,-0.1808455547,-1.382820731\C,-3.4664  
835858,2.5049298128,-0.5356938871\C,-0.4160395695,-3.2687109768,1.4298  
857562\C,-0.4033130029,-2.740551811,-1.4088006096\C,-0.9985043367,-3.3  
60961138,2.7053935975\C,0.819628969,-3.890066877,1.1990448148\C,1.4608  
730259,-4.5898570382,2.2212261571\C,-0.3612821683,-4.0767372617,3.7161  
731084\C,0.8703468498,-4.6923751968,3.4785179725\H,-1.9344729525,-2.85  
96473183,2.9151539227\H,1.3329399271,-3.7926613756,0.2525041434\H,2.44  
00776299,-5.0119177977,2.0247614479\H,-0.8234438975,-4.1426077783,4.69  
67444696\H,1.3717376644,-5.2328740311,4.2756316503\C,-5.3092672282,-0.  
5413474746,-1.4163496153\C,-3.1309394848,-0.4991264751,-2.4686376165\C  
, -3.6454953798,-1.1764360251,-3.5710304903\C,-4.9921931797,-1.54366590  
78,-3.5959758062\C,-5.8204910713,-1.2262315752,-2.5185848734\H,-2.0866  
190697,-0.2151765728,-2.4490057899\H,-2.9916786412,-1.4230425026,-4.40  
17576143\H,-5.3945005731,-2.0793592112,-4.4503596373\H,-6.8665130847,-  
1.516403446,-2.5321626666\H,-5.9551650143,-0.2991677517,-0.5793455778\  
C,-3.9922811319,2.8171190546,-1.7952263189\C,-3.0553409882,3.547868318  
7,0.3095347539\C,-3.1336768009,4.8716883264,-0.1101419903\C,-4.0749504

056,4.1468390125,-2.21093698\C,-3.6355763345,5.1736801651,-1.378144596  
4\H,-4.3184360244,2.0280932877,-2.4612531522\H,-2.6702358012,3.3244626  
52,1.296679096\H,-2.7846880873,5.6637331687,0.5438737762\H,-4.47033587  
86,4.3746811417,-3.195938066\H,-3.6779882483,6.2048660007,-1.713789521  
8\C,0.1248299271,-1.7663534748,-2.265933622\C,-0.2869394539,-4.0962836  
601,-1.760643384\C,0.3049947271,-4.4637422244,-2.9662305402\C,0.715880  
5803,-2.1367826305,-3.4750305567\C,0.7967785793,-3.482714545,-3.830353  
4167\H,0.0898664529,-0.7206612927,-1.9737880154\H,-0.6439807103,-4.862  
9832956,-1.0815833774\H,0.3905834467,-5.5139567954,-3.2269302324\H,1.1  
325937557,-1.3764303093,-4.125780028\H,1.2593621032,-3.768516222,-4.77  
00808765\Pd,-1.0604876199,0.1142362097,0.5356288105\C,1.4771839669,3.7  
591575238,-0.8571390641\C,1.6202728405,2.7224232802,-1.8904130523\C,2.  
568855716,1.7501961957,-1.7359814879\C,2.4868374265,3.8121693662,0.213  
0354348\C,3.3958398291,2.7948139933,0.3155840296\C,3.4582655598,1.7084  
788757,-0.6173252365\H,2.6843335431,0.9836802763,-2.4896917829\H,4.119  
4821265,2.7787596963,1.1230972897\C,0.6882744742,2.7625038792,-3.10802  
93782\C,2.491094843,5.0200466647,1.1613848227\O,0.5143277976,4.5714506  
233,-0.8853104225\C,1.0288514155,1.664638351,-4.1277801524\C,-0.767144  
2268,2.5473855432,-2.6459168181\H,2.056010168,1.7495092079,-4.49630134  
47\H,0.3540575805,1.7406635734,-4.9868022324\H,0.9055576137,0.66772735  
24,-3.696381047\C,1.1739152135,5.0999834871,1.9657521004\H,0.322859592  
5,5.1891586872,1.2911762422\H,1.1958666094,5.9687656096,2.6345286432\H  
,1.0465210745,4.2058536096,2.5843297373\C,2.6555039751,6.3121882228,0.  
3279236157\H,1.8347930143,6.418232174,-0.3818135356\H,3.6002357721,6.2  
926907083,-0.2259390816\H,2.6679737726,7.1872075317,0.9885091157\C,3.6  
532596225,4.9561360051,2.1652056316\H,3.5742344739,4.0869987149,2.8240  
402577\H,3.6400574323,5.8513008238,2.7955034202\H,4.6249880853,4.91494  
55273,1.6630228942\C,4.4120019184,0.7039878174,-0.4327753963\C,1.18753  
21231,0.0913767862,1.1210206201\C,3.5857532086,-0.7976198617,1.4061529  
901\C,2.0992500647,-1.0469925357,1.239633925\H,1.9910707978,-1.6775016  
647,0.3559670929\H,1.718304398,-1.6505822295,2.0735525586\C,4.76636995  
32,-0.2956353085,-1.451577968\H,5.1710659634,0.8743147342,0.3253355385  
\C,6.1046784196,-0.3582855715,-1.8749296524\C,3.8385286024,-1.16770343  
65,-2.0429442107\C,4.2324292744,-2.0525020886,-3.043259219\C,6.4920596  
559,-1.2214799109,-2.8964847982\C,5.5564965842,-2.0742258691,-3.484519  
7262\H,5.8605647275,-2.7614968524,-4.2685566594\H,3.5037504563,-2.7356  
168037,-3.4668418876\H,6.8354928212,0.2928190769,-1.4049377229\H,7.528  
1111018,-1.24116052,-3.2216635798\H,2.8142585663,-1.1710591776,-1.6931  
916483\C,4.3496027907,-1.9728438136,1.0549731125\C,4.0510812049,0.1214  
385198,2.4224597343\C,0.66818558,1.2190420646,1.2486674334\C,-0.403286  
7373,2.0995274878,1.2017751337\H,-0.4482899181,2.8550997507,0.42321684  
82\H,-0.8607672274,2.3791239977,2.149628362\O,3.8575672678,-2.98952648  
5,0.5447847435\O,5.6780466438,-1.8984048427,1.3392837562\C,6.409244345  
7,-3.1296073588,1.2256840082\C,6.8759514218,-3.40020073,-0.1951478087\

H,5.7827738475,-3.9521164654,1.583210192\H,7.2583543449,-3.0045780311,  
1.9038737878\H,6.0168547831,-3.498221674,-0.8602122927\H,7.45887416,-4  
.3282868126,-0.2262034505\H,7.5038672204,-2.5841912428,-0.5596490729\O  
,5.1899474392,0.5324539641,2.6123097462\O,3.0025660941,0.5719885303,3.  
1988961648\C,3.3467922639,1.5055740774,4.2262698036\C,2.0516948947,2.0  
781031413,4.7714349541\H,3.9203739028,0.990879248,5.0066000477\H,3.998  
2792756,2.2808739548,3.813869863\H,1.4139318349,1.284125456,5.17233626  
5\H,1.5003745513,2.5942640273,3.9809213867\H,2.2592185399,2.7951322742  
,5.572222735\H,-0.8496142584,1.6139514809,-2.0762707373\H,-1.44468180  
68,2.4843969847,-3.5058345864\H,-1.0862415258,3.3650563034,-2.00314311  
96\C,0.8055374447,4.1255909342,-3.8255092616\H,1.8259970306,4.27759366  
83,-4.1933143393\H,0.5527297945,4.9373686577,-3.1440847611\H,0.1265309  
401,4.158602813,-4.6861348404\

## TS2

1\1\GINC-A02R01N07\Freq\RB3LYP\GenECP\C68H68O6P2Pd1\ACJSGGHI7X\10-Jan-  
2024\0\#p freq genecp b3lyp empiricaldispersion=gd3bj geom=check gues  
s=read\TS2\0,1\C,-6.0469827091,1.4071821193,0.3451574197\C,-5.346723  
3956,1.7562040455,-0.9035500339\C,-4.4475763642,0.8672370345,-1.439210  
8282\C,-4.1560767017,-0.3903535469,-0.84828088\C,-4.7958453186,-0.7052  
13723,0.3840870839\C,-5.6999624773,0.1298369073,0.9888938339\H,-3.9184  
6658,1.1106939957,-2.3548528827\H,-4.503742048,-1.6240394687,0.8703635  
734\C,-6.3326793869,-0.2216783386,2.3399852116\C,-5.6319044186,3.11225  
18398,-1.5579199024\C,-7.8677880099,-0.3171723459,2.1905320021\H,-8.27  
04614268,0.6272712961,1.8254718679\H,-8.3282710755,-0.5549526862,3.157  
0945901\H,-8.1347327395,-1.1111945665,1.4838725586\C,-5.9760978041,0.8  
694997089,3.3755276823\H,-6.3417490077,1.8408254458,3.0435603743\H,-4.  
8896596178,0.9284140513,3.5097127201\H,-6.4256932921,0.6303141831,4.34  
67837367\C,-5.8217147041,-1.5681825378,2.8828367312\H,-6.0634252335,-2  
.3997494111,2.2114797297\H,-6.2956360091,-1.7742632863,3.8480691986\H,  
-4.7373627127,-1.557734599,3.038615594\C,-5.2914487651,4.2451804618,-0  
.5608630769\H,-5.9136671365,4.1631644398,0.3296955161\H,-5.4589529851,  
5.2231416563,-1.0287163198\H,-4.2410073538,4.1851133302,-0.2564896981\  
C,-7.1232934153,3.2031647298,-1.9536418179\H,-7.7547383189,3.071879557  
7,-1.0754006044\H,-7.3721900337,2.4284445714,-2.6873617128\H,-7.335486  
7634,4.1794294222,-2.4062004881\C,-4.7917826443,3.3288198494,-2.828291  
074\H,-3.7164861264,3.2822771887,-2.6232324248\H,-5.0105453834,4.31715  
42961,-3.2457165675\H,-5.0180438826,2.5858740557,-3.6004646301\O,-6.89  
66268916,2.1825674482,0.8523510083\C,-3.1406429955,-1.2305872863,-1.44  
12965608\C,-3.3148148881,-2.7252073602,-1.4878876768\H,-2.8304866506,-  
0.8479206362,-2.4141037279\C,-4.5480073693,-3.3262468401,-1.1833290936  
\C,-4.7209813318,-4.7063046594,-1.2820504918\C,-3.6709426159,-5.521272  
565,-1.7032295095\C,-2.2786644922,-3.5562097331,-1.9487150442\C,-2.452  
1058486,-4.9348815566,-2.0464368754\H,-5.3852729586,-2.7073988097,-0.8

880546585\H,-1.3223311077,-3.1245719058,-2.2087821057\H,-1.6279517967,  
-5.5523773578,-2.3929648686\H,-5.6856100114,-5.1411519524,-1.036961392  
5\H,-3.8050520956,-6.5964236946,-1.7779080481\O,3.8894747913,0.3599399  
92,-1.4827023029\C,4.7628071276,0.3080968398,-0.4130107822\C,3.6376978  
714,1.5542397971,-2.1306284737\C,4.4807011038,-0.703352308,0.515830386  
5\C,5.8496075402,1.1617059066,-0.265269796\C,6.6858215145,0.9917537679  
,0.8394561133\C,5.3439104431,-0.8687642794,1.602280142\C,6.443531733,-  
0.0246843023,1.764085156\H,5.1367655277,-1.6428136956,2.3331869194\H,7  
.1008837698,-0.1510534287,2.6180968513\H,7.5286406722,1.6617672789,0.9  
750148882\H,6.0250566051,1.9497311063,-0.9885509254\C,2.7393380264,2.4  
861903065,-1.5837087388\C,4.2363257488,1.7522654847,-3.3712029404\C,3.  
9594778076,2.9113302949,-4.0949908123\C,2.4834232742,3.6485463837,-2.3  
282551517\C,3.0869669393,3.8621079637,-3.5671273089\H,1.7929097756,4.3  
859122306,-1.9386379868\H,2.8657623584,4.7690546913,-4.1203417439\H,4.  
9050107443,0.9873586672,-3.7509183603\H,4.4227292778,3.0671168218,-5.0  
639652094\P,2.8742975128,-1.5515496834,0.3076483267\P,1.9271710902,2.1  
893198345,0.0448709929\C,3.1611992317,-2.757077918,-1.0450032151\C,2.7  
370601805,-2.6073796675,1.7976949242\C,3.2120678067,2.6797892985,1.252  
0816732\C,0.685694829,3.5285835795,0.1261474575\C,4.0345015003,3.79222  
43188,1.0214593935\C,3.3534119765,1.9486263971,2.4361827249\C,4.309049  
8184,2.3232684821,3.380320464\C,4.9852499702,4.1659326314,1.9679811655  
\C,5.1240075487,3.4309753953,3.1481931069\H,3.9325491456,4.3586684452,  
0.1012623823\H,2.7182591761,1.085489948,2.6054432079\H,4.4209499634,1.  
743784587,4.2912731371\H,5.6198676855,5.0277108788,1.7845344633\H,5.86  
98311781,3.7200030405,3.8824938002\C,4.3366531571,-2.7535878225,-1.806  
4105776\C,2.1516115274,-3.68913422,-1.3350474742\C,2.3245150731,-4.598  
3318778,-2.3769198101\C,3.4923353388,-4.5845338202,-3.1432576642\C,4.4  
977031415,-3.6613137121,-2.8542646157\H,1.2274832186,-3.6726777231,-0.  
7722089234\H,1.5359461039,-5.3119927599,-2.5970440983\H,3.618861603,-5  
.2897465801,-3.9593792144\H,5.4123111955,-3.6486869006,-3.4397991069\H  
,5.1295208921,-2.0494411028,-1.582673868\C,3.4242149104,-3.8224815584,  
1.9206003485\C,1.9008903096,-2.1833387292,2.8406863797\C,1.75879124,-2  
.9575543101,3.9919462463\C,3.2816899425,-4.5955329059,3.0723907662\C,2  
.4496367847,-4.1648870888,4.1084505299\H,4.0590041042,-4.1655033916,1.  
1099294086\H,1.343775624,-1.2540325554,2.7390486727\H,1.0998980114,-2.  
6246872682,4.788140356\H,3.8150451136,-5.5373485044,3.1591075944\H,2.3  
346431514,-4.7729310564,5.0006317924\C,-0.3755731949,3.5051982738,-0.7  
952093657\C,0.7176202289,4.5089761056,1.1240798313\C,-0.3071782119,5.4  
553686137,1.2043661871\C,-1.3816110486,4.4632043575,-0.7183181756\C,-1  
.3559378394,5.4349062219,0.28658182\H,-0.4260535859,2.7218061,-1.54496  
9969\H,1.5290121265,4.5304733395,1.841923339\H,-0.2819143349,6.2069217  
753,1.9877991186\H,-2.1986663937,4.441768804,-1.4310419564\H,-2.156260  
016,6.1651325975,0.3535004395\Pd,1.0884591838,0.0698245398,0.463893402  
5\C,-1.4487477715,-0.7791795129,-0.5189627425\C,-1.7848048678,0.503625

6292,0.2546832393\C,-0.6361584948,0.8953646225,1.1299410145\H,-2.68636  
0077,0.3621489571,0.8516384227\H,-1.9867486574,1.2983951063,-0.4633381  
399\C,-0.5703968922,1.4499456307,2.2948331918\C,-0.4401940824,2.065913  
2235,3.4536323213\H,-0.4651869082,3.1520414864,3.5100571278\H,-0.32897  
60606,1.5209237441,4.3881801468\C,-1.1696281612,-1.9461047209,0.377708  
5807\C,-0.5600884851,-0.4752122347,-1.6867018351\O,0.1656916545,-1.507  
9042441,-2.1710811934\O,-2.0046578211,-1.9120019635,1.4406955035\O,-0.  
3732922694,-2.8597235285,0.2164991566\O,-0.5891092474,0.6123814576,-2.  
2578217575\C,0.9384079658,-1.237948711,-3.366779617\C,0.074677705,-1.3  
583629681,-4.6108318111\H,1.7255205227,-1.9906020193,-3.348059487\H,1.  
3823134448,-0.2443091991,-3.2808083262\H,-0.3960839206,-2.3447082986,-  
4.6605258861\H,0.6923890064,-1.2278154117,-5.5057260652\H,-0.704043186  
4,-0.5928092723,-4.6145443529\C,-1.9179896809,-3.0175594675,2.36952023  
64\C,-2.72265875,-4.2106896639,1.8822956238\H,-2.3230037266,-2.6120162  
338,3.2993708615\H,-0.8664006463,-3.2759969854,2.5116160507\H,-3.77040  
65228,-3.9398406658,1.7329741372\H,-2.6755900336,-5.0133747457,2.62616  
40168\H,-2.3245777638,-4.5850347062,0.9376938031\

### Int3

1\1\GINC-A04R05N06\Freq\RB3LYP\GenECP\C68H68O6P2Pd1\ACJSGGHI7X\06-Jan-  
2024\0\#P Geom=AllCheck Guess=TCheck SCRF=Check GenChk RB3LYP/GenECP  
Freq\TS\0,1\O,-3.5308076797,-1.7795298372,1.6346813766\C,-4.43842522  
96,-0.8061717845,2.0278476147\C,-3.8656666701,-2.5757991641,0.54562574  
87\C,-4.482360785,0.4213525602,1.3458601043\C,-5.2497095755,-1.0625044  
596,3.1283808934\C,-6.15974499,-0.0933155803,3.5524744394\C,-5.4147368  
406,1.3741818302,1.7815466287\C,-6.2502922066,1.1190143934,2.869386772  
9\H,-5.4702386131,2.3291490051,1.272387132\H,-6.9618986303,1.873817831  
2,3.1878918087\H,-6.7958208168,-0.2896302252,4.4096430894\H,-5.1592468  
521,-2.0181092065,3.633826624\C,-2.8509819492,-2.8629604545,-0.3798756  
811\C,-5.1584956427,-3.0706463639,0.3973264737\C,-5.4710947946,-3.8462  
633774,-0.7161364512\C,-3.2013130671,-3.6214602015,-1.5046922846\C,-4.  
4954039684,-4.1098007308,-1.675204932\H,-2.4618038991,-3.8093239009,-2  
.2716602091\H,-4.7383536949,-4.687039317,-2.5611128078\H,-5.911774143,  
-2.8273082818,1.1374453882\H,-6.4797808272,-4.2281375987,-0.8381239931  
\P,-3.2589636979,0.7900188526,0.0215920503\O,-1.169753758,-2.143470913  
7,-0.128431869\C,-3.923686426,-0.0032597934,-1.4903582306\C,-3.5138114  
305,2.5734197474,-0.3092421125\C,-0.4071517392,-3.2353051303,1.1520868  
848\C,-0.2433177551,-2.5428890112,-1.6541171521\C,-1.0244002869,-3.366  
3102214,2.4078902645\C,0.8379926886,-3.8484523164,0.9455899157\C,1.450  
0061586,-4.5757151698,1.9674643158\C,-0.4184745729,-4.1121471385,3.416  
3606615\C,0.8213163545,-4.7185428613,3.2021061954\H,-1.9693517665,-2.8  
766905197,2.6005819095\H,1.3650112666,-3.7417650895,0.0077249273\H,2.4  
286814467,-5.007350209,1.787256447\H,-0.9127687816,-4.207810735,4.3786  
765709\H,1.2955113292,-5.2882747233,3.9956821518\C,-5.2704055504,-0.35



93704389,-1.6191215879\C,-3.0525413945,-0.20127357,-2.570952047\C,-3.5  
214053005,-0.7500076738,-3.7618758138\C,-4.8642460941,-1.1117392652,-3  
.8822904867\C,-5.735555418,-0.9170401728,-2.8098945555\H,-2.0117257114  
,0.0815343677,-2.4807075542\H,-2.8354068667,-0.8985805835,-4.589993997  
6\H,-5.2302949454,-1.5465879003,-4.8074013408\H,-6.779408051,-1.202485  
8458,-2.8972725366\H,-5.9513156079,-0.209631035,-0.7881597794\C,-4.035  
4539522,3.0251654671,-1.5282357674\C,-3.1010463302,3.5121696854,0.6487  
990737\C,-3.1694655978,4.874775464,0.3779659972\C,-4.111558715,4.39258  
94121,-1.7920756259\C,-3.66679174,5.317557969,-0.8488500671\H,-4.35874  
35866,2.3161413714,-2.2802245669\H,-2.712823117,3.1780943369,1.6026136  
399\H,-2.8067801334,5.585847905,1.1120475612\H,-4.5019266708,4.7315762  
283,-2.7466891215\H,-3.6976655916,6.3796092355,-1.070082831\C,0.338886  
7788,-1.4903554002,-2.3738153388\C,-0.0329927092,-3.863665607,-2.08645  
24801\C,0.7314870288,-4.1208230899,-3.2220762484\C,1.1100156052,-1.750  
3703858,-3.5084091581\C,1.3036926377,-3.0638519936,-3.9344029799\H,0.2  
149871156,-0.4686639233,-2.0269564478\H,-0.4475622378,-4.6909200966,-1  
.5200550343\H,0.8909825591,-5.1453745587,-3.54353215\H,1.573393513,-0.  
9280279758,-4.0418262633\H,1.9077986348,-3.2655114432,-4.8136972694\Pd  
, -1.090046519,0.1156923153,0.5061988995\C,1.3640721288,3.7436171278,-0  
.2548425453\C,1.5853931605,2.8602820924,-1.3869530944\C,2.5532791064,1  
.8679396107,-1.3074988354\C,2.3511162471,3.7046112549,0.8106455831\C,3  
.3094166005,2.7001295307,0.8165810172\C,3.3869059511,1.7231456195,-0.1  
878072406\H,2.6796277411,1.1758193159,-2.1324940153\H,4.0142449441,2.6  
323712063,1.6355774281\C,0.7134519338,3.033135808,-2.6374753913\C,2.32  
56343996,4.7881743394,1.9006902253\O,0.336595974,4.5128099784,-0.19306  
59824\C,1.1406877739,2.1073515608,-3.7871930423\C,-0.7536102162,2.7209  
94247,-2.2864728502\H,2.1899599488,2.2540790623,-4.0626141336\H,0.5252  
933071,2.3094185772,-4.6709643061\H,1.0046952751,1.0534904458,-3.52782  
98179\C,1.0173011707,4.7236260218,2.7206531169\H,0.1627789599,4.833396  
7484,2.0525423114\H,0.9976098663,5.5256326296,3.4697724117\H,0.9435588  
411,3.7674742792,3.2519495827\C,2.4209742362,6.1757883652,1.226402303\  
H,1.5924787963,6.3050063438,0.5286581326\H,3.3639715111,6.2683996197,0  
.6766793413\H,2.386038193,6.9728557367,1.9799796951\C,3.5007406313,4.6  
524904602,2.8839072813\H,3.4741426568,3.701619922,3.4274565708\H,3.454  
7123409,5.460382294,3.6226833508\H,4.4669738989,4.7208257147,2.3734141  
593\C,4.3178399547,0.5396984407,-0.0099344251\C,1.1758550958,0.1141470  
664,0.9225197645\C,3.6488769664,-0.5891902615,0.8734452168\C,2.1700656  
09,-0.8799222597,0.5266624407\H,2.0879511265,-1.0201635921,-0.55049701  
86\H,1.9105682999,-1.8282630028,0.9896780054\C,4.8946711637,0.05115297  
6,-1.3301554535\H,5.1669633318,0.86687525,0.5940020273\C,6.0733658603,  
0.6601327824,-1.7852121037\C,4.3085714996,-0.9246482135,-2.1470297167\  
C,4.8844634834,-1.2842652919,-3.3681481354\C,6.6522250764,0.3058001088  
, -3.001151787\C,6.0590034872,-0.6741858656,-3.8017203758\H,6.507913409  
4,-0.9544324228,-4.7500035048\H,4.4067231392,-2.0486460205,-3.97495151

37\H,6.5331573265,1.4292913432,-1.1710662809\H,7.5672647511,0.79350790  
01,-3.3247775099\H,3.40808766,-1.4379291688,-1.8401049618\C,4.41877147  
69,-1.9104542867,0.7122075841\C,3.7714473625,-0.2102506749,2.362161764  
1\C,0.6165603424,1.1287792658,1.3920965055\C,-0.4712454828,1.971493450  
1,1.5500855008\H,-0.5333333292,2.8523076915,0.906693025\H,-0.916315993  
6,2.0650324123,2.5391153569\O,3.941234934,-2.9615264549,0.3283349298\O  
,5.7083774686,-1.7427672335,1.0378750118\C,6.5981806524,-2.8576692223,  
0.7852838439\C,7.0379557593,-2.87629491,-0.6692338173\H,6.0882053895,-  
3.7831659023,1.0631117987\H,7.4375125466,-2.6859552442,1.4620363619\H,  
6.1881472423,-3.0670418002,-1.3267175884\H,7.7824031111,-3.6652266469,  
-0.8194630034\H,7.4773611867,-1.9172175478,-0.9531923744\O,4.550271256  
4,0.5816785453,2.8391765659\O,2.8900241733,-0.9231786626,3.0903122213\  
C,2.80330283,-0.602862717,4.4952196355\C,1.551627283,-1.2762962072,5.0  
213402255\H,3.7105751831,-0.959821566,4.9937045079\H,2.7689130338,0.48  
46870967,4.602605999\H,1.5969691336,-2.3573298829,4.8671092131\H,0.667  
9337447,-0.8987136374,4.4989718107\H,1.4401121239,-1.0764449258,6.0916  
169389\H,-0.8268636882,1.7161978086,-1.8513282116\H,-1.3979030044,2.76  
08385266,-3.1744263734\H,-1.1084001533,3.4341132934,-1.5453272513\C,0.  
8119532112,4.4893127363,-3.1447725744\H,1.8378917199,4.716127005,-3.45  
46610389\H,0.5217013426,5.1751178187,-2.3484911916\H,0.1531463379,4.63  
97474894,-4.0098330872\

### Int3'

1\1\GINC-OMC-1-823\Freq\RB3LYP\GenECP\C68H68O6P2Pd1\SHIMGRP\27-Feb-202  
3\0\#P Geom=AllCheck Guess=TCheck SCRF=Check GenChk RB3LYP/GenECP Fre  
q\int2\_6\0,1\O,2.9341082898,-1.9135803242,-1.7010825595\C,3.84373948  
75,-0.9791215501,-2.1632137473\C,3.1258041158,-2.5546339422,-0.5024205  
447\C,3.9268133817,0.2822248428,-1.5538807923\C,4.5601372054,-1.302245  
0559,-3.3111797663\C,5.3963960819,-0.3462169492,-3.8874181885\C,4.7727  
267263,1.2243236577,-2.1560346008\C,5.5020714254,0.9175724649,-3.30656  
05714\H,4.8440880369,2.2179744116,-1.728196181\H,6.145946272,1.6702001  
557,-3.7513430542\H,5.9543853551,-0.5872783307,-4.7868345328\H,4.43081  
82309,-2.2878215139,-3.7453872804\C,1.9644076338,-3.043829687,0.120413  
0464\C,4.3894221135,-2.7519215704,0.0507533128\C,4.5028569751,-3.40532  
10853,1.2750084698\C,2.1070841979,-3.6924619435,1.3558105427\C,3.36341  
7006,-3.8700268149,1.9317268728\H,1.227369567,-4.0490102305,1.87584435  
01\H,3.4481119536,-4.3605447515,2.8955816342\H,5.2616675974,-2.3604478  
928,-0.4584136333\H,5.48237639,-3.525574055,1.7249169224\P,2.849899875  
2,0.6242024686,-0.0812628093\P,0.3289623395,-2.6207258781,-0.583808142  
6\C,4.0061029354,0.1748934788,1.283245681\C,2.8820668782,2.4659126535,  
-0.1009323397\C,0.3848776016,-3.1283513229,-2.3543563434\C,-0.80079756  
84,-3.9576448909,-0.0082941007\C,1.3596779465,-4.0016446735,-2.8523998  
367\C,-0.6564913483,-2.7188017608,-3.195407206\C,-0.700542003,-3.14203  
82196,-4.5236158425\C,1.314481084,-4.4243908311,-4.1795774266\C,0.2902

647147,-3.9879658339,-5.02219135\H,2.1573570986,-4.349892955,-2.206511  
4703\H,-1.4310805859,-2.0662391936,-2.8147655923\H,-1.509126813,-2.807  
0281582,-5.1662234068\H,2.0805037316,-5.0966496963,-4.5551569523\H,0.2  
601022807,-4.3130719961,-6.0578209526\C,5.4053289115,0.2262198601,1.18  
66720727\C,3.4239491037,-0.3044074899,2.4636152246\C,4.2216439223,-0.7  
073398926,3.5340525326\C,5.6115071003,-0.6537222948,3.4306581494\C,6.2  
025873037,-0.186926329,2.2532532284\H,2.3466806848,-0.3596788262,2.562  
768896\H,3.7465190623,-1.0643913892,4.4424407482\H,6.2342665378,-0.974  
7359241,4.2608755773\H,7.2848728635,-0.1457809512,2.1661240768\H,5.871  
555531,0.5687114795,0.268180943\C,3.9095189223,3.2538200944,0.43800454  
43\C,1.7850199927,3.0989898135,-0.7024839906\C,1.7280233261,4.49058287  
35,-0.7888086611\C,3.8515657105,4.6451600972,0.3522750709\C,2.76526921  
22,5.2656380861,-0.2680156682\H,4.74663298,2.7783577174,0.9384073385\H  
,0.9620293709,2.5003286592,-1.0774426417\H,0.8515620866,4.9554488697,-  
1.2261779854\H,4.6511228754,5.244554055,0.7780695157\H,2.7169158797,6.  
349192248,-0.3235555543\C,-2.1569350935,-3.646298969,0.1476942136\C,-0  
.3875009236,-5.2911528232,0.1231956399\C,-1.3111247489,-6.2846610824,0  
.4414186518\C,-3.0837413414,-4.6448291061,0.4484222439\C,-2.6610804585  
, -5.9641912723,0.6051827572\H,-2.4759735842,-2.613878603,0.0407801792\  
H,0.6546026772,-5.5524884111,-0.0252000584\H,-0.978471691,-7.312363961  
,0.5527612014\H,-4.1307944162,-4.3864892537,0.5745608251\H,-3.37880713  
63,-6.7412383789,0.8498563809\Pd,-0.532874889,-0.5298274517,0.06757796  
13\C,-0.1963990195,0.4345299854,3.1823884708\C,-1.330387098,-0.4309246  
648,2.7772753749\C,-2.1504867274,-0.0214852001,1.7362178151\C,-0.14252  
10138,1.7915779827,2.6011119626\C,-0.8790956447,2.0498556864,1.4788119  
277\C,-1.8497367924,1.1203202933,0.9182920933\H,-3.047759408,-0.581918  
3488,1.5245829307\H,-0.8057324616,3.0092153957,0.9847376639\C,-1.70822  
04383,-1.6116511068,3.6851697757\C,0.6063105445,2.8931515904,3.3681218  
132\O,0.6348594316,0.0454333768,4.0295853658\C,-3.0788724369,-2.205278  
0849,3.3151322361\C,-0.642752037,-2.7221615805,3.5839782588\H,-3.88060  
58619,-1.4651976634,3.4095764482\H,-3.3060393032,-3.0328286854,3.99466  
32454\H,-3.0958636403,-2.6064474266,2.3013723401\C,2.1094628663,2.5990  
169656,3.5379930298\H,2.2650142734,1.6767994031,4.0928129892\H,2.58419  
68101,3.4265115453,4.0786340179\H,2.6011059351,2.5119314117,2.56943427  
67\C,-0.0389799605,2.9925049776,4.7723244547\H,0.0723987067,2.05518353  
2,5.319944022\H,-1.1056754792,3.230446595,4.6951459111\H,0.4456731921,  
3.7887457507,5.3485822403\C,0.4572618919,4.2598808201,2.6809641061\H,0  
.90135012,4.2646799228,1.6842744666\H,0.9710280292,5.020626054,3.27739  
93254\H,-0.5924503698,4.5602165968,2.5926859092\C,-2.9745164977,1.7363  
881849,0.0515169794\C,-0.7975639294,0.191852512,-1.8077565674\C,-2.801  
8573442,1.7612569591,-1.5159616293\C,-2.222018319,0.4971610286,-2.1833  
389204\H,-2.8648668158,-0.3516439015,-1.9409250783\H,-2.294548063,0.64  
42451288,-3.2632861395\C,-4.3351800072,1.2069371936,0.4890491406\H,-2.  
9820323076,2.795328948,0.3146757305\C,-5.0455628735,1.9301811216,1.456

1929641\C,-4.8911344432,0.0084593639,0.0222628324\C,-6.1169078211,-0.4  
504956962,0.5075159956\C,-6.2683688287,1.4752220412,1.9466114365\C,-6.  
8104052856,0.2788741268,1.4724328901\H,-7.7629159671,-0.0794145563,1.8  
506753867\H,-6.5275505465,-1.3813861453,0.1277573391\H,-4.6254783817,2  
.8597965287,1.830282638\H,-6.7973176042,2.0544412711,2.6977300127\H,-4  
.3710812508,-0.578575676,-0.7244239146\C,-4.1876449167,2.0256399646,-2  
.1337205359\C,-1.9308574886,2.9621490712,-1.9240841489\C,0.21799757,0.  
3453485977,-2.6007422262\C,1.2460042667,0.4098115002,-3.4175029107\H,1  
.8815345462,1.2881862042,-3.4813717751\H,1.5172828949,-0.4437424045,-4  
.0346945841\O,-4.7727258551,1.2889266801,-2.8943848219\O,-4.6802511793  
,3.192930256,-1.6804406732\C,-6.0589375723,3.4787596284,-2.0111511104\  
C,-6.530082507,4.5610319976,-1.0612409663\H,-6.6361147157,2.5567779429  
,-1.9060170189\H,-6.1082877613,3.7914804968,-3.0592139786\H,-6.4772982  
09,4.205572392,-0.028817418\H,-7.5673734371,4.8280671251,-1.2853404965  
\H,-5.9137014138,5.4597541698,-1.153304212\O,-1.3578857762,3.720658465  
,-1.1709634871\O,-1.9225667732,3.0820543269,-3.2630800685\C,-1.1962330  
053,4.1950770186,-3.8376621371\C,0.2259972457,3.7949959344,-4.18722726  
19\H,-1.7689756152,4.4556864077,-4.7305318062\H,-1.2221509551,5.029654  
5363,-3.1337716534\H,0.2310419516,2.9067663853,-4.8231281787\H,0.80482  
47939,3.5784367162,-3.2881826023\H,0.7171906506,4.6149025345,-4.721793  
2517\H,-0.6514241878,-3.1540472323,2.580392971\H,-0.8600025569,-3.5244  
530954,4.2991087363\H,0.3476064486,-2.3174054947,3.7950758114\C,-1.810  
2599917,-1.1230520534,5.1511637865\H,-2.5422653477,-0.3122982431,5.236  
2886437\H,-0.8487923079,-0.765697318,5.5159140973\H,-2.1470465997,-1.9  
489365383,5.7874206897\

### Int3''

1\1\GINC-A04R02N02\Freq\RB3LYP\GenECP\C68H68O6P2Pd1\ACJSGGHI7X\11-Jan-  
2024\0\#P Geom=AllCheck Guess=TCHECK SCRF=Check GenChk RB3LYP/GenECP  
Freq\1Bu\0,1\C,-6.1322919287,1.3461284973,0.7819097903\C,-5.53828115  
25,1.8138827487,-0.4689508467\C,-4.6532622754,0.9968379694,-1.15082224  
51\C,-4.2810295272,-0.2789764212,-0.695241398\C,-4.8801161373,-0.75620  
30077,0.4866442119\C,-5.7774039894,-0.0033543219,1.2226668258\H,-4.187  
9368518,1.3525388396,-2.0662783698\H,-4.6087836721,-1.748074223,0.8218  
675199\C,-6.3955288832,-0.5446402927,2.518049271\C,-5.8741219812,3.224  
2708973,-0.9684844294\C,-7.934897859,-0.5735500484,2.3868295861\H,-8.3  
019582715,0.4272322927,2.1586808698\H,-8.3935899953,-0.9244972833,3.32  
00078055\H,-8.236782108,-1.2543764693,1.5825790696\C,-5.9950361944,0.3  
67422358,3.7002217473\H,-6.324030799,1.387832599,3.5044433335\H,-4.905  
8509186,0.3652750063,3.8305931924\H,-6.4500077822,0.009478369,4.632700  
8205\C,-5.9204150358,-1.9713358909,2.8446618911\H,-6.1784036031,-2.682  
6208855,2.0521737269\H,-6.3979896174,-2.3131775466,3.7693174771\H,-4.8  
351599024,-2.0084221883,2.9992393615\C,-5.4009863806,4.2567289231,0.08  
14490922\H,-5.8867414864,4.0562062868,1.0367452121\H,-5.6449369956,5.2

764886294,-0.2438607215\H,-4.3146900585,4.1906604108,0.2185575914\C,-7  
.3990408655,3.3623492992,-1.1774544478\H,-7.9190983215,3.1363183111,-0  
.2468150564\H,-7.7411441487,2.6677150604,-1.9531358149\H,-7.6508742426  
,4.3811633506,-1.49854733\C,-5.1862632209,3.555493424,-2.3036709022\H,  
-4.0937296735,3.5096054094,-2.2257622187\H,-5.4551658609,4.5717085133,  
-2.6120567027\H,-5.4930079288,2.871922621,-3.1028233332\O,-6.922192136  
7,2.0778225197,1.4551204925\C,-3.1377913542,-0.984685306,-1.3798771634  
\C,-3.4012296736,-2.4493948118,-1.7497941304\H,-2.9948394329,-0.453652  
5757,-2.328291724\C,-4.7268394134,-2.8749876577,-1.9128861472\C,-5.024  
9628705,-4.1823641047,-2.2977684146\C,-4.0030083383,-5.1013961989,-2.5  
345619057\C,-2.3832496221,-3.3799124838,-2.0065431056\C,-2.6785534673,  
-4.6885943364,-2.3894990746\H,-5.5277790052,-2.1709875309,-1.721048661  
6\H,-1.3443974617,-3.1000702632,-1.8998035229\H,-1.8653673914,-5.38632  
49765,-2.5748208654\H,-6.0633988703,-4.4814529129,-2.4078964245\H,-4.2  
345399721,-6.1205340685,-2.8301041816\O,3.7609982485,0.1040113499,-1.6  
731594955\C,4.8080539105,0.1814911788,-0.7744904189\C,3.4172836296,1.2  
097233166,-2.431552505\C,4.6683899231,-0.6404336745,0.3523650624\C,5.9  
245089659,0.9877982914,-0.9619415643\C,6.9342711696,0.9642462164,0.001  
465679\C,5.6989501661,-0.6593362138,1.2968862953\C,6.8292771887,0.1393  
415493,1.1220012768\H,5.600371094,-1.2793251825,2.1809730178\H,7.61915  
77342,0.128154525,1.8657002725\H,7.805582865,1.5983670169,-0.127477762  
7\H,5.9924240183,1.6298311156,-1.8325094415\C,2.5769302102,2.200217821  
6,-1.8954740184\C,3.8659453591,1.2568321899,-3.7477216514\C,3.49817198  
49,2.3250226612,-4.5649707985\C,2.233846249,3.2723348074,-2.7346736848  
\C,2.6887503983,3.3371101863,-4.0511823745\H,1.5921121283,4.0575578272  
, -2.3565165794\H,2.4001177056,4.1767885156,-4.6748249832\H,4.493009660  
9,0.449570869,-4.1106344834\H,3.8435880068,2.3639222072,-5.592959559\O  
,3.0364047991,-1.4221112201,0.5680717721\O,1.9478798706,2.0918111269,-  
0.1639031151\C,3.0160732032,-2.8444907156,-0.5834200891\C,3.1197064414  
, -2.2125372698,2.2150609034\C,3.3677532988,2.6592705721,0.8416298314\C  
,0.7551377603,3.4746059448,-0.0633804754\C,4.209545469,3.6848657142,0.  
3888216098\C,3.5777491144,2.1013588207,2.1075034638\C,4.621402247,2.55  
90395411,2.9113899303\C,5.2498536975,4.1412755157,1.194365104\C,5.4578  
211305,3.5779424679,2.4558262358\H,4.0509174198,4.1205651691,-0.592387  
9773\H,2.9232427819,1.3086505373,2.4540546287\H,4.7824550928,2.1150402  
538,3.8887708124\H,5.8996819641,4.9347923835,0.8380995794\H,6.27216067  
16,3.932232121,3.080461521\C,4.0398241004,-3.0897478826,-1.5058735016\  
C,1.8825856817,-3.6724855135,-0.5734420594\C,1.7707660248,-4.720160482  
3,-1.4833646173\C,2.7878697217,-4.9528098471,-2.413212498\C,3.92284468  
67,-4.1406640842,-2.4179553102\H,1.0826035692,-3.4682323268,0.12667571  
07\H,0.8831466013,-5.3459047115,-1.4744807985\H,2.6962704632,-5.763666  
1695,-3.1293313357\H,4.719657903,-4.3228468132,-3.1328371729\H,4.92335  
95702,-2.4611414174,-1.5164095615\C,3.8751936499,-3.372647303,2.440804  
1213\C,2.396060695,-1.6450242596,3.2735492507\C,2.4390774274,-2.220821

0147,4.5436302995\C,3.9174244591,-3.9452207353,3.7108566788\C,3.201152  
8782,-3.3689602838,4.7633739745\H,4.4208648094,-3.8276500572,1.6199058  
525\H,1.7810066846,-0.7670864026,3.094224403\H,1.8697772934,-1.7790444  
265,5.3556610925\H,4.5040337107,-4.8432420722,3.8792356213\H,3.2311118  
065,-3.8201981974,5.7504452063\C,-0.3740818373,3.4600021374,-0.9009326  
074\C,0.8810790327,4.4715989145,0.9105577978\C,-0.1197323232,5.4359649  
986,1.0547052747\C,-1.3612677049,4.4294851355,-0.7565674352\C,-1.24232  
86578,5.4139439535,0.2290833251\H,-0.4925204332,2.6731081864,-1.638544  
7285\H,1.7451533566,4.4908064405,1.5641875843\H,-0.01997341,6.20013131  
95,1.8197084873\H,-2.2370329938,4.4054832326,-1.3962909766\H,-2.027951  
0374,6.1524268444,0.3525621233\Pd,1.1355299532,0.0596182904,0.54008064  
11\C,-1.7373851018,-0.7068353091,-0.6172512885\C,-1.855700195,0.625805  
5911,0.1892123569\C,-0.6480246775,0.9540105546,1.0167853205\H,-2.74619  
07553,0.5670416825,0.8188836712\H,-2.0391918393,1.4161647068,-0.539632  
3341\C,-0.6012718674,1.5587451777,2.160129385\C,-0.4838953361,2.226494  
8192,3.2906155148\H,-0.4365712084,3.3128899155,3.2912103398\H,-0.46781  
32615,1.7252224051,4.2554644071\C,-1.3334314212,-1.7381470031,0.422811  
7487\C,-0.6803619396,-0.481730381,-1.7068711276\O,0.1249444529,-1.5335  
131538,-1.9404735592\O,-2.3270600517,-2.4792123329,0.8595806127\O,-0.2  
004860367,-1.8054930534,0.9235231291\O,-0.6539774739,0.5346082896,-2.3  
782431757\C,0.9921126558,-1.4470452228,-3.1036672499\C,0.2441077379,-1  
.8854400836,-4.349749831\H,1.8217892087,-2.1105572164,-2.8693456031\H,  
1.3537443529,-0.4226700409,-3.1892286202\H,-0.148811214,-2.8987899006,  
-4.2323868041\H,0.9228263242,-1.8737694605,-5.2088766904\H,-0.58802395  
07,-1.2094590408,-4.5602121457\C,-2.0893374427,-3.4354370751,1.9277723  
876\C,-1.6653439956,-4.7723233032,1.3456203917\H,-3.0551237956,-3.5000  
017285,2.4302680128\H,-1.343007655,-3.022915042,2.6088659811\H,-2.3835  
414563,-5.1071566857,0.5935995365\H,-1.61224569,-5.5182776094,2.144746  
6438\H,-0.6795239485,-4.7019300197,0.8788613798\

### TS3

1\1\GINC-A01R05N08\Freq\RB3LYP\GenECP\C68H68O6P2Pd1\ACJSGGHI7X\07-Jan-  
2024\0\#p freq genecp b3lyp empiricaldispersion=gd3bj geom=check gues  
s=read\TS2\0,1\O,-3.7532470618,-1.76615578,1.5769435694\C,-4.6661245  
315,-0.787619484,1.9483039677\C,-4.0529774855,-2.5562592817,0.47390896  
92\C,-4.6637219945,0.4588480284,1.2970228291\C,-5.5279788772,-1.056404  
0006,3.0069324434\C,-6.4387593979,-0.0828163116,3.4195781894\C,-5.5951  
51994,1.4172393105,1.7225507934\C,-6.4789269342,1.1496762813,2.7683582  
444\H,-5.6114539514,2.3866962799,1.2376526506\H,-7.189154095,1.9090977  
223,3.0792031349\H,-7.113118461,-0.2906766285,4.2441988375\H,-5.474018  
0756,-2.0257059318,3.4911868714\C,-2.9994226865,-2.8815331795,-0.39661  
02258\C,-5.3509789351,-3.0135857724,0.2591114465\C,-5.629255227,-3.788  
7317443,-0.8637321469\C,-3.3157484934,-3.6413668402,-1.5311823078\C,-4  
.6131780187,-4.0923698798,-1.7671238812\H,-2.54292002,-3.8606552404,-2

.2560308013\H,-4.8262519403,-4.6723808589,-2.6590377884\H,-6.134670840  
3,-2.742586251,0.9567819807\H,-6.6418821207,-4.1401304489,-1.035412145  
9\P,-3.3786418128,0.8414145193,0.0394146738\P,-1.3243814398,-2.1642001  
586,-0.0950171592\C,-4.0050874569,0.1171466119,-1.5217384508\C,-3.5430  
299234,2.6443275725,-0.2303012495\C,-0.5652093846,-3.2267122382,1.2106  
800043\C,-0.3661289964,-2.5636757344,-1.6047903611\C,-1.1754421841,-3.  
2797582709,2.476781598\C,0.6825957975,-3.8463598082,1.038244151\C,1.30  
60411098,-4.4970163007,2.1042924331\C,-0.5572880297,-3.9487243283,3.53  
08601669\C,0.6876138557,-4.5575614544,3.3509931191\H,-2.124935006,-2.7  
848357763,2.6376674106\H,1.1996386136,-3.807473661,0.0887165926\H,2.28  
45035726,-4.9392637562,1.9480966777\H,-1.0459508859,-3.9841593374,4.50  
02544762\H,1.1705638257,-5.0691770348,4.1783029755\C,-5.3372553352,-0.  
268559314,-1.7037443646\C,-3.0926196934,-0.0421919019,-2.575265655\C,-  
3.5046470692,-0.585062985,-3.7892554768\C,-4.8327449646,-0.9812128015,  
-3.9603460434\C,-5.7458584052,-0.8214997357,-2.9176387484\H,-2.0617571  
498,0.2609536353,-2.4379146222\H,-2.7866093266,-0.7071271054,-4.594351  
3508\H,-5.154127635,-1.4159187565,-4.9020162122\H,-6.7781319509,-1.132  
8430987,-3.0454058992\H,-6.0498397714,-0.1498749492,-0.8946525302\C,-4  
.0101626452,3.1755634666,-1.4391762127\C,-3.0799293275,3.5166115097,0.  
7681351633\C,-3.0617196538,4.8911120759,0.5523287921\C,-3.9913983552,4  
.5545497644,-1.6512571436\C,-3.5094544082,5.4124098248,-0.6636472724\H  
, -4.3693527063,2.515920923,-2.2202681834\H,-2.7155597306,3.1149484813,  
1.7067300483\H,-2.6711311713,5.5505833999,1.3200906315\H,-4.3419300668  
,4.9553048279,-2.5975113847\H,-3.4713969084,6.4823267779,-0.8418663366  
\C,0.1970422837,-1.5005562836,-2.3249534477\C,-0.1135028658,-3.8792153  
676,-2.0289309263\C,0.6800938481,-4.1219482694,-3.1482455262\C,0.99206  
51347,-1.7440094877,-3.4465038836\C,1.2344846632,-3.0543810257,-3.8581  
71323\H,0.0375492552,-0.4825480458,-1.9823494101\H,-0.5193039393,-4.71  
50189563,-1.4683511518\H,0.8750657991,-5.1435557587,-3.459408222\H,1.4  
316844417,-0.9107995392,-3.984599914\H,1.8601262923,-3.2450575847,-4.7  
24799122\Pd,-1.2625448639,0.0960264664,0.556935959\C,1.6094312028,3.80  
35538511,-0.117682241\C,1.7914485417,2.9158007646,-1.2699271702\C,2.67  
83360552,1.8674197777,-1.1848239176\C,2.5072607973,3.6116692276,1.0247  
357522\C,3.3654432503,2.5329356509,1.0403739264\C,3.4122906686,1.58048  
17955,-0.0047377055\H,2.8025030965,1.2021607904,-2.0298682642\H,4.0053  
157387,2.3576780122,1.8954913319\C,0.937616156,3.1466576107,-2.5235549  
472\C,2.4798870244,4.6308832396,2.1725927763\O,0.7082373997,4.69468756  
49,-0.1127977507\C,1.2885215059,2.1643886717,-3.6530972376\C,-0.553608  
509,2.9461360937,-2.1716847729\H,2.3418235299,2.2312267795,-3.94455270  
1\H,0.6785924752,2.3864586968,-4.5352592516\H,1.0828463039,1.129839438  
6,-3.3611321324\C,1.0934913569,4.6448393012,2.8562426501\H,0.317339928  
3,4.845535113,2.1173596132\H,1.0620135879,5.4191971124,3.6329398516\H,  
0.8965000962,3.6793410079,3.3351098197\C,2.7787756448,6.0384739557,1.6  
070064478\H,2.0375141097,6.3059165909,0.8535275337\H,3.7731256577,6.06

19561152,1.1476771433\H,2.7585135889,6.7841044813,2.411318316\C,3.5309  
972552,4.3179892814,3.2509709634\H,3.3632834976,3.3406512049,3.7162039  
281\H,3.480347992,5.0761659574,4.039912964\H,4.5474787799,4.3283431105  
,2.8436695683\C,4.3968437477,0.4143813384,0.0713605688\C,1.4805597522,  
0.2008291175,0.711311756\C,3.7244542277,-0.8412107478,0.7394609783\C,2  
.2494287944,-0.9669599004,0.3163252151\H,2.1906292266,-1.0973030023,-0  
.7641920713\H,1.830025851,-1.8567398719,0.7802640168\C,5.0619799005,0.  
1218124201,-1.2654119695\H,5.1923765045,0.7035741955,0.7606109935\C,6.  
2883338756,0.742383104,-1.5389519325\C,4.5077897299,-0.699021468,-2.25  
82308164\C,5.1600484469,-0.8934799076,-3.4771875696\C,6.9434121201,0.5  
515220407,-2.7538715042\C,6.3806759159,-0.2712693717,-3.7321261679\H,6  
.8882508234,-0.4233998854,-4.6798891834\H,4.7076270062,-1.5379692307,-  
4.2258228814\H,6.7286507977,1.3872968522,-0.7836687868\H,7.8939542594,  
1.0442794547,-2.9365409345\H,3.5706921532,-1.2142694507,-2.0926859408\  
C,4.4464475845,-2.1465899619,0.4019638952\C,3.7624881537,-0.6962096735  
,2.2748642137\C,0.6201570858,0.9715842418,1.1720564754\C,-0.4044642565  
,1.8781325413,1.4250410487\H,-0.5165540436,2.7354034946,0.7673434755\H  
,-0.6760769026,2.0600204796,2.4628670296\O,3.9342437182,-3.1127773888,  
-0.1276627645\O,5.7335653065,-2.0749477736,0.7755653907\C,6.5870105499  
,-3.1835108995,0.3988260503\C,7.0703447218,-3.0244929015,-1.0330096282  
\H,6.0320438659,-4.114638331,0.5354350921\H,7.410937425,-3.1409767879,  
1.113914525\H,6.2340051368,-3.0911351567,-1.7308458934\H,7.7894605324,  
-3.8153039389,-1.2707004409\H,7.5528712216,-2.0542595976,-1.1730822989  
\O,4.3467447072,0.1584125304,2.8992313601\O,3.0283800146,-1.6795351895  
,2.8328283119\C,2.7437268388,-1.5718778954,4.2471775399\C,1.5001384498  
,-0.7234754368,4.4560887412\H,2.5869410066,-2.6021417085,4.5713469873\  
H,3.6152236703,-1.1499873655,4.7519058299\H,0.6534064928,-1.1501953045  
,3.9116344896\H,1.6684334181,0.2956429381,4.0990394471\H,1.2504638743,  
-0.6822878689,5.5215737845\H,-0.7131427656,1.9482535579,-1.7445516695\  
H,-1.1810254679,3.0389839593,-3.0668686682\H,-0.8722591475,3.684761205  
3,-1.4375747582\C,1.1525151625,4.5795547949,-3.0586309955\H,2.19546869  
3,4.7201562223,-3.3633183481\H,0.9101899679,5.3062031269,-2.283563392\  
H,0.5154378328,4.7591031843,-3.9337050149\

### TS3'

1\1\GINC-OMC-1-807\SP\RB3LYP\GenECP\C68H68O6P2Pd1\SHIMGRP\09-Mar-2023\  
0\#p sp b3lyp/genecp empiricdispersion=gd3bj scrf=(smd,solvent=acet  
onitrile)\TS\0,1\O,0,3.887227,1.542168,0.441896\C,0,4.568091,0.67456  
5,1.266678\C,0,3.874922,1.389084,-0.925815\C,0,4.05107,-0.600943,1.552  
734\C,0,5.718014,1.162291,1.883453\C,0,6.396076,0.371876,2.808915\C,0,  
4.753512,-1.373501,2.492014\C,0,5.910862,-0.899838,3.110705\H,0,4.3864  
74,-2.359663,2.747253\H,0,6.426565,-1.525933,3.832185\H,0,7.291633,0.7  
50096,3.291952\H,0,6.048895,2.16455,1.633569\C,0,2.733268,1.894769,-1.  
567153\C,0,4.916583,0.794591,-1.630131\C,0,4.811011,0.667358,-3.014946



\C,0,2.656427,1.761076,-2.960183\C,0,3.683139,1.148777,-3.679608\H,0,1.777464,2.122932,-3.481693\H,0,3.593926,1.03855,-4.755426\H,0,5.776697,0.410389,-1.094075\H,0,5.605098,0.176575,-3.567687\P,0,2.504305,-1.209079,0.715831\P,0,1.298183,2.386375,-0.532418\C,0,3.202931,-1.89617,-0.840975\C,0,2.211633,-2.719948,1.737035\C,0,1.970538,3.558677,0.723748\C,0,0.44669,3.609107,-1.637346\C,0,3.029067,4.43874,0.465203\C,0,1.369835,3.565954,1.987744\C,0,1.812551,4.449262,2.975014\C,0,3.475754,5.313157,1.452526\C,0,2.865493,5.323759,2.71018\H,0,3.521715,4.422491,-0.501566\H,0,0.572665,2.862268,2.203241\H,0,1.338849,4.445122,3.952568\H,0,4.302434,5.986314,1.243518\H,0,3.215159,6.006714,3.478819\C,0,4.499949,-2.426378,-0.922434\C,0,2.391907,-1.896478,-1.979878\C,0,2.857611,-2.437919,-3.177964\C,0,4.144064,-2.969758,-3.250385\C,0,4.96711,-2.96004,-2.121192\H,0,1.401388,-1.46127,-1.926636\H,0,2.213401,-2.436524,-4.049373\H,0,4.508037,-3.387531,-4.184472\H,0,5.972928,-3.366832,-2.175382\H,0,5.146245,-2.409493,-0.050871\C,0,2.771548,-3.973729,1.458946\C,0,1.456711,-2.560383,2.906885\C,0,1.285147,-3.622613,3.793017\C,0,2.588018,-5.040853,2.340336\C,0,1.852863,-4.867289,3.513196\H,0,3.355162,-4.119756,0.557864\H,0,1.00131,-1.60068,3.11922\H,0,0.698079,-3.47917,4.695562\H,0,3.019806,-6.009197,2.105801\H,0,1.712248,-5.69898,4.196913\C,0,-0.9501,3.667876,-1.655436\C,0,1.163519,4.539846,-2.408722\C,0,0.496217,5.493308,-3.173648\C,0,-1.622808,4.626026,-2.415508\C,0,-0.900949,5.541558,-3.177503\H,0,-1.535867,2.949548,-1.102375\H,0,2.247156,4.511907,-2.422008\H,0,1.067233,6.201188,-3.767565\H,0,-2.708182,4.634108,-2.413481\H,0,-1.418201,6.285669,-3.776007\Pd,0,0.612703,0.30093,0.497896\C,0,-1.035603,-2.414704,-2.019123\C,0,-1.306692,-0.967519,-2.207953\C,0,-1.59688,-0.204249,-1.118967\C,0,-1.01442,-2.959125,-0.63992\C,0,-1.234845,-2.11785,0.404008\C,0,-1.688226,-0.737614,0.240396\H,0,-1.896504,0.824404,-1.255513\H,0,-1.248568,-2.497175,1.419398\C,0,-1.381855,-0.416969,-3.640366\C,0,-0.861572,-4.474382,-0.45861\O,0,-0.834791,-3.150305,-3.001074\C,0,-1.639964,1.095327,-3.659669\C,0,-0.059356,-0.669786,-4.397652\H,0,-2.575809,1.373179,-3.165112\H,0,-1.700961,1.439528,-4.697052\H,0,-0.830458,1.64497,-3.177175\C,0,0.463382,-4.978966,-1.069985\H,0,0.491823,-4.791966,-2.142113\H,0,0.566364,-6.055807,-0.891996\H,0,1.315912,-4.478316,-0.607879\C,0,-2.057114,-5.169012,-1.156022\H,0,-2.056281,-4.96856,-2.227055\H,0,-3.00498,-4.81958,-0.733271\H,0,-1.992596,-6.252447,-1.001808\C,0,-0.901024,-4.870174,1.025361\H,0,-0.10418,-4.39635,1.5986\H,0,-0.774724,-5.953706,1.113827\H,0,-1.861896,-4.611265,1.483712\C,0,-3.065168,-0.583357,0.948596\C,0,-1.051495,0.75925,1.652294\C,0,-3.484631,0.904547,1.177902\C,0,-2.170312,1.719715,1.37657\H,0,-1.977147,2.296252,0.478256\H,0,-2.283833,2.430881,2.19823\C,0,-4.09918,-1.505678,0.325464\H,0,-2.908318,-0.955665,1.960324\C,0,-4.671508,-2.504246,1.123664\C,0,-4.435415,-1.464335,-1.032378\C,0,-5.299314,-2.4093,-1.583397\C,0,-5.544921,-3.444789,0.579079\C,0,-5.85528,-3.406275,-0.781118\H,0,-6.521967,-4.147055,-1.212138\H,0,-5.527754,-

2.369863,-2.644385\H,0,-4.430216,-2.533767,2.181378\H,0,-5.97597,-4.21  
1719,1.215772\H,0,-4.007543,-0.704692,-1.671743\C,0,-4.310579,1.507488  
,0.036263\C,0,-4.293013,0.982676,2.480639\C,0,-0.674374,0.442564,2.864  
012\C,0,-0.347999,0.156138,4.107935\H,0,-0.953488,-0.515324,4.71583\H,  
0,0.54263,0.571943,4.576416\O,0,-3.851991,2.164761,-0.879706\O,0,-5.61  
0324,1.223445,0.169619\C,0,-6.516389,1.816125,-0.796476\C,0,-6.589545,  
1.014222,-2.083902\H,0,-6.19093,2.841969,-0.985024\H,0,-7.476619,1.828  
686,-0.277286\H,0,-5.632619,1.038203,-2.609263\H,0,-7.352413,1.449914,  
-2.73752\H,0,-6.85346,-0.025329,-1.87954\O,0,-4.461432,0.0714,3.261531  
\O,0,-4.727599,2.240967,2.687182\C,0,-5.398166,2.489948,3.94578\C,0,-4  
.386742,2.737804,5.052817\H,0,-6.015177,3.37032,3.754834\H,0,-6.039629  
,1.636414,4.17547\H,0,-3.730874,3.575213,4.797453\H,0,-3.775751,1.8471  
7,5.217349\H,0,-4.905226,2.978249,5.986519\H,0,0.78109,-0.198676,-3.87  
8895\H,0,-0.120794,-0.234638,-5.401777\H,0,0.131071,-1.737904,-4.48828  
5\C,0,-2.544495,-1.110852,-4.389481\H,0,-3.504,-0.879751,-3.913677\H,0  
,-2.411209,-2.192148,-4.404627\H,0,-2.589133,-0.745321,-5.421662\

### TS3''

1\1\GINC-OMC-1-813\Freq\RB3LYP\GenECP\C68H68O6P2Pd1\SHIMGRP\31-Dec-202

3\0\#p freq genecp b3lyp empiricdispersion=gd3bj geom=check guess=r  
ead\TS2\0,1\O,-3.1953054521,-1.5056334856,1.8095617705\C,-3.60244798  
53,-0.416409451,2.5705616547\C,-4.0658958853,-2.0360632956,0.868295644  
4\C,-3.5855442094,0.8867205004,2.0326749383\C,-3.9197680901,-0.6550312  
064,3.9034157511\C,-4.235114983,0.4128199335,4.7437667438\C,-3.8921058  
011,1.9425660339,2.9039684135\C,-4.2195413524,1.7119298934,4.240886449  
2\H,-3.8501438317,2.960477133,2.5373603644\H,-4.4478957188,2.552483565  
6,4.8880628644\H,-4.4791817495,0.2274345927,5.7848589516\H,-3.89791732  
86,-1.6771065989,4.2660153212\C,-3.5328235345,-2.3579609607,-0.3888964  
548\C,-5.4012187458,-2.269820982,1.1836626205\C,-6.245517161,-2.806299  
1835,0.2148437646\C,-4.408906965,-2.8717060924,-1.3525044342\C,-5.7530  
881036,-3.0932581364,-1.0577161634\H,-4.044500636,-3.0737636705,-2.351  
465942\H,-6.4138558891,-3.4824239298,-1.8251585168\H,-5.7688940774,-2.  
0115010638,2.1704553956\H,-7.2898153945,-2.9842453477,0.4515068219\O,-  
2.941020809,1.1714405266,0.3281062429\O,-1.7440662764,-2.0261774188,-0  
.6884833152\C,-4.2940715388,0.7168445879,-0.8258587689\C,-2.9549240604  
,2.989213284,0.0800293375\C,-0.9394020771,-3.5335254774,-0.0103031309\  
C,-1.4751663529,-2.1434134641,-2.4914916255\C,-1.2864490986,-3.9998477  
345,1.2670160777\C,0.1051816628,-4.1624145832,-0.701903881\C,0.7977383  
304,-5.227703055,-0.1247739826\C,-0.5997475151,-5.0711570075,1.8342325  
489\C,0.4485552759,-5.6837085494,1.1446678437\H,-2.0772998648,-3.51801  
38902,1.8273975701\H,0.3969211379,-3.8111529179,-1.6845713325\H,1.6251  
905556,-5.6791157293,-0.6618675525\H,-0.8823598878,-5.4241863738,2.821  
788582\H,0.9916525808,-6.5079684683,1.5962347755\C,-5.6304289987,0.583  
7999599,-0.4392823621\C,-3.9527409985,0.5952922273,-2.1803156118\C,-4.

9339807732,0.3357631985,-3.1332265614\C,-6.2672344306,0.1972047828,-2.7416248287\C,-6.6118266033,0.3208642691,-1.3956653436\H,-2.9174627418,0.7001564963,-2.4857522584\H,-4.6557221632,0.2378320279,-4.1781098395\H,-7.0338725935,-0.0095413649,-3.4821601284\H,-7.6463589716,0.2072854661,-1.0859289722\H,-5.9020879332,0.6711363258,0.6075151154\C,-4.1404318458,3.7326642957,0.2254348475\C,-1.7966149354,3.6415232267,-0.351326619\C,-1.7875906096,5.0203015965,-0.57134112\C,-4.1350763108,5.1070581253,0.0039368241\C,-2.9559465446,5.7547837717,-0.3821275964\H,-5.0663963959,3.2368814537,0.4989631345\H,-0.8945640841,3.0830738466,-0.5380726754\H,-0.853396719,5.4822361579,-0.8749224635\H,-5.0533017096,5.6738770872,0.1267328175\H,-2.9574734139,6.8283653917,-0.5452687754\C,-0.9226177578,-1.0253150132,-3.1332933812\C,-1.737861899,-3.3014986602,-3.2408700273\C,-1.4867802122,-3.3216693431,-4.6118102799\C,-0.6680614178,-1.0480058726,-4.5045385683\C,-0.9579595446,-2.1939196817,-5.2457347596\H,-0.6761127664,-0.1452112432,-2.5464604926\H,-2.1130286363,-4.1929831584,-2.7488413182\H,-1.6932906816,-4.2209684084,-5.1840086277\H,-0.2328771386,-0.1759917736,-4.981826146\H,-0.7588165825,-2.2159911623,-6.3128270463\Pd,-0.949220383,-0.0314261238,0.1826257111\C,2.1222281208,3.6718163784,-0.5438609649\C,2.3364816669,2.5952179307,-1.5164100721\C,2.8985040212,1.4207710882,-1.0913570477\C,2.7345881483,3.5069575199,0.784471159\C,3.3140899469,2.3021474944,1.1219312713\C,3.2812159252,1.1720686507,0.2632211692\H,3.0288559596,0.6105678585,-1.796681408\H,3.7267544301,2.1535185797,2.1135438006\C,1.9023642035,2.7828800334,-2.9774227732\C,2.6901613153,4.6835604707,1.7703185131\O,1.4389319985,4.6954452774,-0.843070129\C,2.2959499487,1.5809863127,-3.8552028247\C,0.369266611,2.942834206,-3.062490285\H,3.374811002,1.3951313684,-3.835775982\H,2.0100018933,1.7812937779,-4.893807445\H,1.7888397139,0.6606282113,-3.5429250115\C,1.2255769409,5.0012435453,2.1501026374\H,0.6429656735,5.2230081977,1.2565915584\H,1.1857256467,5.8653386175,2.824845737\H,0.7714408953,4.1489015286,2.6683745725\C,3.3336606308,5.9292365878,1.1202521216\H,2.8057739658,6.1935928434,0.2040247681\H,4.383871656,5.733022562,0.877335473\H,3.2985918839,6.7795828294,1.8121002309\C,3.4564428943,4.3798387082,3.068728681\H,3.0191383501,3.5379469273,3.6161032516\H,3.421380603,5.2557012243,3.7253168243\H,4.509640485,4.1501666886,2.8747017183\C,4.1244120267,-0.0711561105,0.596967198\C,1.0641664788,-0.6425509834,0.273699709\C,3.3213927701,-1.405578756,0.8224918843\C,2.099028798,-1.6279117331,-0.1100826304\H,2.3860417413,-1.4977074071,-1.159029917\H,1.7621598991,-2.6528295039,0.0039245194\C,5.2754096712,-0.189151297,-0.3945764253\H,4.5785732438,0.1233603504,1.5688968345\C,6.4522586752,0.5197475167,-0.1155171364\C,5.2135745269,-0.9151902227,-1.5913302681\C,6.294638505,-0.9345036991,-2.4755146431\C,7.5329220208,0.5034195318,-0.9936838213\C,7.4592632284,-0.228016711,-2.1816327325\H,8.3000292973,-0.2451107517,-2.8685921451\H,6.2222911188,-1.5086621233,-3.3947989786\H,6.5102157803,1.096452364,0.8034237194\H,8.4334097267,1.060272470

6,-0.7509090501\H,4.331301619,-1.4929353348,-1.8373369379\C,4.25508642  
03,-2.6155851188,0.7077058511\C,2.7871150793,-1.3979039829,2.274744894  
8\C,1.213542272,0.5697872767,0.6885485829\C,0.2855311441,1.5348295762,  
1.1471845863\H,0.2841381197,2.5091076007,0.6831538524\H,0.1168988344,1  
.571156138,2.2236856535\O,4.1052132357,-3.5443326054,-0.0586644751\O,5  
.2660681632,-2.5117761585,1.5882794808\C,6.3020941451,-3.5203502896,1.  
5129036373\C,7.3131160893,-3.17349758,0.4324756693\H,5.833811087,-4.49  
00592551,1.3282377631\H,6.7527397891,-3.5160867045,2.5076002813\H,6.84  
62124206,-3.1983265704,-0.5535951294\H,8.1353063989,-3.896663518,0.449  
5073589\H,7.7202916272,-2.1719090225,0.5896040376\O,3.056285569,-0.582  
0789759,3.1268881618\O,1.9694000051,-2.452131225,2.4718620116\C,1.2445  
798793,-2.4843938701,3.7218717985\C,0.0559348901,-1.5350422052,3.69278  
70946\H,0.923871669,-3.5237675027,3.8118203595\H,1.9315387407,-2.23796  
61766,4.5352472179\H,-0.5907304544,-1.7464284432,2.8387729654\H,0.3938  
902902,-0.4996158153,3.6208348135\H,-0.5273377771,-1.6449805736,4.6136  
926684\H,-0.1332006811,2.0790540268,-2.6094222528\H,0.0460180481,3.014  
6891381,-4.1088498062\H,0.0574294545,3.8416440914,-2.5341156567\C,2.58  
0082786,4.0418084045,-3.5611510377\H,3.6688418934,3.9222281835,-3.5621  
335208\H,2.3239085076,4.9162923117,-2.9626376087\H,2.2546283236,4.2074  
74949,-4.5955309712\

#### Int4

1\1\GINC-A01R05N08\Freq\RB3LYP\GenECP\C68H68O6P2Pd1\ACJSGGHI7X\06-Jan-  
2024\0\#P Geom=AllCheck Guess=TCheck SCRF=Check GenChk RB3LYP/GenECP  
Freq\TS\0,1\O,-4.033468342,-1.7981583862,1.1188271262\C,-4.938022576  
6,-0.8962930022,1.657170125\C,-4.2459357981,-2.2977091139,-0.156281542  
3\C,-4.8837022817,0.4588317918,1.2897274202\C,-5.8389699887,-1.3629318  
827,2.6098377814\C,-6.7286626712,-0.4724296068,3.2114258332\C,-5.79099  
63894,1.3330699857,1.9056504001\C,-6.7075113151,0.8753063187,2.8531724  
212\H,-5.7662893422,2.3856765775,1.6467612891\H,-7.3982316502,1.573999  
0635,3.3147077345\H,-7.4329402058,-0.8327511759,3.9546420334\H,-5.8290  
960538,-2.4172743988,2.8653728419\C,-3.1035795029,-2.6156396427,-0.909  
4577199\C,-5.5328400241,-2.4857886391,-0.6528017591\C,-5.7022169712,-3  
.0073552881,-1.9335388863\C,-3.3074907798,-3.1507829833,-2.1883281207\  
C,-4.5895010657,-3.3480707526,-2.6994137031\H,-2.4512762175,-3.3827690  
538,-2.8089208159\H,-4.714647671,-3.7497822534,-3.6997857031\H,-6.3867  
568478,-2.2067037153,-0.0465099036\H,-6.7042647221,-3.139945602,-2.328  
9950417\H,-3.5914764937,1.0238587982,0.0975837504\H,-1.4455656833,-2.0  
628616104,-0.2983535486\C,-4.395646199,0.7062719951,-1.5245702918\C,-3  
.7010842222,2.851315143,0.2706987271\C,-0.9138189278,-3.4003104213,0.8  
675657908\C,-0.3742558689,-2.3254916862,-1.7750942777\C,-1.761400788,-  
3.7572297993,1.9313108114\C,0.3628760203,-3.9823698371,0.8075845967\C,  
0.7797284314,-4.8902286451,1.7816950017\C,-1.3445522886,-4.6742238534,  
2.8947747484\C,-0.07088781,-5.2438283082,2.827345016\H,-2.7420025742,-

3.3064313738,2.0126278905\H,1.057223219,-3.7334679147,0.0167325302\H,1  
.7804395042,-5.3049042429,1.714579128\H,-2.0173827892,-4.9388035887,3.  
7055602628\H,0.2525385213,-5.9535197313,3.5832936029\C,-5.7795381458,0  
.8224602664,-1.7169350035\C,-3.5823080375,0.3488672602,-2.60690623\C,-  
4.14134616,0.115919452,-3.8633148978\C,-5.5185492437,0.236711591,-4.04  
78313122\C,-6.3372003491,0.5901152084,-2.9725565972\H,-2.5134781399,0.  
2391413275,-2.4519394432\H,-3.5014979602,-0.1707885839,-4.6923413163\H  
,-5.9551825726,0.0497919024,-5.0244362617\H,-7.4105818005,0.6801876801  
,-3.111913997\H,-6.4189489931,1.0877039892,-0.8808133152\C,-4.25036556  
09,3.6909652868,-0.704776255\C,-3.1326262093,3.4237810739,1.4209736422  
\C,-3.1253384463,4.8041309356,1.5966021066\C,-4.2290426682,5.077869249  
2,-0.5332888074\C,-3.6703981138,5.6367996903,0.6146851314\H,-4.6900939  
985,3.2669999873,-1.6003205281\H,-2.68263964,2.7786086103,2.1693329492  
\H,-2.6784604134,5.2321684847,2.4888242456\H,-4.6499352106,5.719283912  
2,-1.3020091755\H,-3.6503067227,6.7147530667,0.7427407192\C,0.15526954  
87,-1.1922972645,-2.4101605027\C,-0.0365565167,-3.5950833408,-2.270345  
1876\C,0.8293822645,-3.726801438,-3.3550260068\C,1.0172436901,-1.32289  
94106,-3.5001167328\C,1.3621409779,-2.5911168991,-3.9692095008\H,-0.07  
76531781,-0.209671046,-2.0114090567\H,-0.4348235137,-4.4838318461,-1.7  
921917532\H,1.0949804007,-4.7161094367,-3.7148549199\H,1.4302107778,-0  
.4351387033,-3.9694286287\H,2.0441603374,-2.6958270918,-4.8078495511\p  
d,-1.3935774695,0.2209738636,0.3307604339\C,2.6625919637,3.9774848633,  
-0.0242904868\C,2.7773661003,3.0750624282,-1.2061523472\C,3.0289713267  
,1.7692906258,-1.0061002653\C,2.9246705322,3.4109044495,1.3318068937\C  
,3.1534039821,2.0909655352,1.456427941\C,3.0956156298,1.1119209729,0.3  
323655693\H,3.0840388294,1.0977268223,-1.8505049893\H,3.3312135058,1.6  
446156372,2.4255738879\C,2.5744606289,3.6576297413,-2.61087116\C,2.904  
4955532,4.3544386981,2.5421848581\O,2.3646046445,5.1688478304,-0.16710  
68016\C,2.7617096077,2.5853639736,-3.6988625367\C,1.1380279629,4.21495  
89177,-2.7385931541\H,3.7578535173,2.1318641568,-3.6645319617\H,2.6342  
846324,3.043627898,-4.6845025098\H,2.017807713,1.7860605126,-3.6081518  
3\C,1.4961381138,4.974245663,2.6969617241\H,1.2152458242,5.5351383566,  
1.8062403237\H,1.4794337239,5.6492893787,3.5605285605\H,0.7511900081,4  
.1892196877,2.8674432893\C,3.952532417,5.4748180115,2.3565775348\H,3.7  
36875425,6.0707933451,1.4702462626\H,4.9567189923,5.0479503141,2.25725  
84452\H,3.9524982642,6.134299033,3.2318293681\C,3.2362940854,3.6071704  
216,3.8450895134\H,2.5077171019,2.8195706977,4.062690988\H,3.221558614  
1,4.3143346881,4.6804701544\H,4.2301153291,3.1490660631,3.8126992577\C  
,4.2371076031,0.0055769806,0.4752421968\C,1.7681873365,0.285965526,0.4  
208182572\C,3.495847943,-1.2908174747,0.9405502082\C,2.0820598185,-1.1  
760759167,0.3522994816\H,2.0907203414,-1.5533309356,-0.6732544272\H,1.  
3590451836,-1.7674233116,0.9045020284\C,5.0810893103,-0.170285448,-0.7  
713416237\H,4.9040458368,0.3149754394,1.2799889337\C,6.3644828425,0.38  
72241252,-0.798874452\C,4.6248311493,-0.8362389734,-1.9200347583\C,5.4

284282893,-0.9369069684,-3.0548431905\C,7.1714704318,0.2894510003,-1.9  
326262904\C,6.705599721,-0.3747213377,-3.0677543982\H,7.3303754515,-0.  
4527663117,-3.9522946875\H,5.0508159687,-1.4570810351,-3.9303664394\H,  
6.7319573675,0.9065099939,0.0817073913\H,8.1631352027,0.7321612947,-1.  
9277975131\H,3.6385429732,-1.2837998604,-1.9419746962\C,4.1894021534,-  
2.5825485493,0.520674318\C,3.3544465534,-1.3164027509,2.4688071588\C,0  
.5692020096,0.8314440208,0.505220776\C,-0.1926643456,1.9920258363,0.58  
06363456\H,-0.3320304051,2.6333648234,-0.2888279807\H,-0.320742546,2.4  
95430337,1.536258416\O,3.7028630485,-3.4450865178,-0.1805460367\O,5.42  
63013201,-2.6336915031,1.0444955301\C,6.2568174448,-3.7515148346,0.646  
1926823\C,6.9077864178,-3.4830521673,-0.7005724767\H,5.6412402456,-4.6  
53790958,0.6222033364\H,6.9955673797,-3.8347560559,1.4459083\H,6.15311  
58227,-3.4277617263,-1.4869214882\H,7.6067850263,-4.2904783752,-0.9421  
793871\H,7.4539076591,-2.5366697031,-0.6844539063\O,3.7006284513,-0.44  
37422912,3.235693457\O,2.7235927346,-2.4443525456,2.8383585257\C,2.198  
8456347,-2.4962229884,4.1873535477\C,0.8572090084,-1.7839750551,4.2417  
737444\H,2.096791009,-3.5623029318,4.3958895976\H,2.9280503751,-2.0509  
211233,4.867568743\H,0.1559652732,-2.2327943393,3.5345316432\H,0.97588  
80405,-0.7248502733,3.9981251491\H,0.4340004438,-1.860884737,5.2487050  
102\H,0.4036917185,3.4165797517,-2.5800528612\H,0.9815936365,4.6225494  
665,-3.7440689861\H,0.9597246493,5.0035764125,-2.0083379605\C,3.602961  
5006,4.7807887169,-2.8711518381\H,4.6235751032,4.3890968222,-2.7992776  
708\H,3.4869631235,5.5896619809,-2.1504963611\H,3.4667931465,5.1863498  
078,-3.8801166743\

#### Int4'

I\1\GINC-OMC-1-816\Freq\RB3LYP\GenECP\C68H68O6P2Pd1\SHIMGRP\03-Mar-202  
3\0\#P Geom=AllCheck Guess=TChef SCRF=Check GenChk RB3LYP/GenECP Fre  
q\int3\0,1\O,3.8159852368,-1.7841714428,-0.7110418423\C,4.6626619987  
,-0.9829754634,-1.4562852233\C,4.1184675615,-2.1107772288,0.5971601555  
\C,4.4216951727,0.4012477656,-1.4954304711\C,5.6663158421,-1.575997296  
3,-2.2162514959\C,6.4773470857,-0.7777508932,-3.0241768321\C,5.2454458  
112,1.1811502455,-2.3191432503\C,6.2674377823,0.6002242946,-3.07164616  
96\H,5.0788547609,2.250859096,-2.3743590425\H,6.8930541911,1.225821949  
,-3.7005661979\H,7.2635267771,-1.2342443606,-3.6173116267\H,5.79184664  
06,-2.6525439661,-2.1705386513\C,3.009646403,-2.3422832374,1.430310326  
5\C,5.4251358063,-2.2512570641,1.0539953315\C,5.6447180383,-2.63999882  
26,2.3752971383\C,3.2605936218,-2.7591953239,2.7419842413\C,4.56546425  
15,-2.9022190568,3.2167443694\H,2.4290206158,-2.9717093617,3.402576607  
7\H,4.7335897998,-3.2195781884,4.2409623947\H,6.2546271528,-2.05040365  
67,0.3861837821\H,6.6622081407,-2.744235347,2.7394517042\O,2.976208138  
5,1.0750937793,-0.5734464924\O,1.3469867669,-2.0133401257,0.6937878093  
\C,3.5711113092,1.1423790465,1.1623837201\C,2.9725047268,2.8415700096,  
-1.0730348355\C,1.2542374136,-3.4259054876,-0.4897050347\C,0.171924185

3,-2.5098762106,2.0166941785\C,1.4436647733,-4.7455208152,-0.056078824  
1\C,1.0343882427,-3.1778910886,-1.8494219601\C,0.9789279287,-4.2350038  
322,-2.7589998711\C,1.3840863752,-5.8011628921,-0.9638346343\C,1.14757  
1372,-5.5474488275,-2.3175081524\H,1.6342976536,-4.9447077226,0.994153  
7258\H,0.9197774915,-2.1527990104,-2.188827583\H,0.8082837206,-4.02951  
58072,-3.8118372676\H,1.5247304455,-6.8206699826,-0.6169329852\H,1.101  
8672838,-6.3708320364,-3.0242852232\C,4.9115823709,1.0238838441,1.5414  
906163\C,2.5879632574,1.2819544122,2.1543450276\C,2.9400909401,1.30317  
02188,3.5013221637\C,4.2803142542,1.165951356,3.8730751227\C,5.2625766  
88,1.0279582182,2.8930223947\H,1.5462184044,1.3604497806,1.8569409063\  
H,2.1691127705,1.4211213171,4.2563736855\H,4.5562834879,1.165250771,4.  
9232854925\H,6.3042235305,0.9154208375,3.1783776106\H,5.6787729485,0.9  
065306687,0.7832619309\C,3.8750885822,3.778424596,-0.5483096281\C,2.03  
54874454,3.2505814554,-2.0313784134\C,2.0260986408,4.5700157566,-2.485  
1971411\C,3.8511224676,5.1004548548,-0.9914114768\C,2.9317325094,5.496  
169459,-1.9657336352\H,4.5902985927,3.4731178177,0.2088393115\H,1.3038  
947759,2.5389029232,-2.3972350459\H,1.2975116882,4.8773324839,-3.22883  
19093\H,4.5479850912,5.8219602408,-0.5751621018\H,2.9131155202,6.52629  
32899,-2.3085991651\C,0.2298547977,-1.8685040575,3.2654292768\C,-0.888  
3406735,-3.3959590211,1.7665864462\C,-1.850191973,-3.6484776253,2.7457  
874587\C,-0.7154264876,-2.1432763173,4.2517894513\C,-1.757964686,-3.03  
67243064,3.9963862733\H,1.0174359283,-1.1495284876,3.4652523648\H,-0.9  
749697793,-3.8863166254,0.8048653708\H,-2.673547848,-4.3179077223,2.51  
87644765\H,-0.6461940942,-1.6446955745,5.2135956776\H,-2.4965349156,-3  
.246830328,4.7641828955\Pd,0.9105130596,-0.0380538057,-0.5968100975\C,  
-2.0433625874,3.6189927652,0.8570497967\C,-1.6535253684,2.409143167,1.  
6416077251\C,-1.641897384,1.2098376313,1.026233583\C,-2.1701544312,3.4  
934244627,-0.6212203297\C,-2.1840194898,2.2630282282,-1.1601012329\C,-  
2.0765957179,0.9863572433,-0.389845558\H,-1.3689481576,0.3160101841,1.  
5730620409\H,-2.3509866174,2.1257028116,-2.2193129007\C,-1.3622692468,  
2.5872053838,3.1375539298\C,-2.3520660722,4.7617690439,-1.4640064478\O  
,-2.2513316931,4.6996555913,1.4184433209\C,-0.9222057365,1.2650908026,  
3.7782022367\C,-0.2444510555,3.6306913433,3.3551648508\H,-1.7058880271  
,0.5056311028,3.7224812801\H,-0.6928932226,1.4308619542,4.8364103915\H  
,-0.0287271978,0.8591202508,3.3000916628\C,-1.2334323421,5.7785079014,  
-1.1441526835\H,-1.2927627917,6.1154810782,-0.1100915848\H,-1.32620686  
84,6.6496647091,-1.8028790707\H,-0.2477786012,5.333503512,-1.307226223  
4\C,-3.7304802049,5.3894224323,-1.1589727487\H,-3.8087150874,5.6548449  
208,-0.1043568898\H,-4.5348324346,4.6877423187,-1.406690103\H,-3.87378  
79885,6.2939525032,-1.7614209485\C,-2.2854496781,4.4412463027,-2.96788  
63195\H,-1.3424387821,3.9514537209,-3.2336819251\H,-2.3598887479,5.371  
3419626,-3.5402661702\H,-3.1054737839,3.7910193395,-3.2887296663\C,-3.  
5465168721,0.2980681027,-0.4548487796\C,-1.1742974787,-0.0490123863,-1  
.1195137237\C,-3.3455966083,-1.038504777,-1.2392006817\C,-1.8609620263

,-1.3956258173,-1.0473494182\H,-1.7549486052,-1.853538555,-0.062952992  
6\H,-1.4965764141,-2.1102968189,-1.7837506073\C,-4.2222858561,0.195592  
5111,0.8917895247\H,-4.1663655754,0.9392397029,-1.0797671925\C,-5.2538  
321739,1.0925659448,1.1905823773\C,-3.8261534068,-0.7173424077,1.88062  
69004\C,-4.4508985346,-0.7324119137,3.1257070082\C,-5.879499148,1.0827  
898775,2.4378542225\C,-5.4803292244,0.1667212224,3.4112577835\H,-5.962  
5042668,0.1565859419,4.3840667472\H,-4.1223236262,-1.4472312798,3.8730  
607204\H,-5.5618423111,1.8124582493,0.4377273706\H,-6.6735887332,1.792  
8994491,2.6481740044\H,-3.029254498,-1.4247107968,1.6893174873\C,-4.27  
716479,-2.1483807424,-0.76603619\C,-3.5721043336,-0.797726647,-2.73450  
14814\C,-0.3575766847,0.3796214603,-2.1629680993\C,-0.2539197924,0.664  
8877972,-3.4555583689\H,-1.1313094001,0.6519255063,-4.1025160697\H,0.6  
933992094,0.9337476449,-3.9145043185\O,-3.9315380737,-3.1493293886,-0.  
1755838716\O,-5.5508572771,-1.8442418849,-1.0752374186\C,-6.57376447,-  
2.7421614123,-0.5795016504\C,-6.9237899461,-2.4161305297,0.8629236414\  
H,-6.2172769618,-3.7696152129,-0.6838013914\H,-7.4204687945,-2.5801400  
259,-1.2498357976\H,-6.0728197537,-2.6096526846,1.517811467\H,-7.76579  
69757,-3.0355976931,1.1890076085\H,-7.1998010687,-1.3638395652,0.96633  
60481\O,-3.7453462832,0.2771392292,-3.2695862984\O,-3.4812064465,-1.95  
83041564,-3.407079545\C,-3.5638427206,-1.8727199971,-4.8475580653\C,-3  
.3541984897,-3.2723700472,-5.3882921139\H,-4.5406997643,-1.4616941237,  
-5.1197879928\H,-2.797647933,-1.1753374192,-5.1990026604\H,-4.12230870  
19,-3.9540979402,-5.0128480042\H,-2.3755553772,-3.6585474727,-5.089234  
493\H,-3.4041805909,-3.2612234855,-6.4812542111\H,0.6813707906,3.32347  
43147,2.8584047484\H,-0.033969631,3.7305224806,4.4263066155\H,-0.53808  
36632,4.6057866875,2.9680659916\C,-2.6555844321,3.0400257865,3.8572526  
364\H,-3.4506117173,2.3020274636,3.7135951872\H,-2.9962164954,4.003025  
898,3.4796039334\H,-2.4640455691,3.1305191749,4.9331082397\

#### Int4''

1\1\GINC-A02R03N07\Freq\RB3LYP\GenECP\C68H68O6P2Pd1\ACJSGGHI7X\04-Jan-  
2024\0\#P Geom=AllCheck Guess=TChech SCRF=Check GenChk RB3LYP/GenECP  
Freq\TS\0,1\O,-4.0759015399,-0.9337760415,1.4206722756\C,-4.46139381  
41,0.2148860533,2.0969041073\C,-4.7280257224,-1.3062890219,0.255683231  
4\C,-3.9493491617,1.4686881882,1.7081936074\C,-5.2651331409,0.06646643  
,3.2225967226\C,-5.5829526269,1.181243186,3.9986884829\C,-4.2651317381  
,2.5679925777,2.5200569613\C,-5.0766495595,2.4308582473,3.6472531559\H  
, -3.8553575305,3.5407228788,2.2790636888\H,-5.3010747753,3.3022928386,  
4.2540399255\H,-6.2088811978,1.0672266936,4.8780039446\H,-5.6159303595  
, -0.9263017828,3.4838802261\C,-3.9307294224,-1.8175943755,-0.780837762  
3\C,-6.1113750873,-1.2037635461,0.1426231439\C,-6.7281246255,-1.582905  
9632,-1.0472803194\C,-4.5757830515,-2.1654099049,-1.9742480908\C,-5.95  
87611354,-2.0505207255,-2.1109871373\H,-3.988452572,-2.506876143,-2.81  
68931157\H,-6.4296056458,-2.3208443437,-3.0505038947\H,-6.6867982602,-



0.8077727463,0.9716868565\H,-7.8059222171,-1.4970735042,-1.1446623062\  
P,-2.7469481416,1.5463067693,0.3123529093\P,-2.0975522349,-1.881838286  
2,-0.5372832328\C,-3.7686795864,1.4181824574,-1.2127832737\C,-2.271616  
8619,3.3186763633,0.1703437772\C,-1.8522921073,-3.4448604893,0.4118810  
903\C,-1.4148262916,-2.2678235072,-2.1925408267\C,-2.5739860006,-3.664  
1187904,1.5960683427\C,-0.8685312641,-4.3723324848,0.0412965822\C,-0.6  
04132934,-5.4860004603,0.8392179469\C,-2.3173624625,-4.7861091712,2.38  
19354773\C,-1.3281348757,-5.6989683478,2.0109689252\H,-3.318302971,-2.  
9477860743,1.9181973363\H,-0.2962291319,-4.2293493589,-0.8661474299\H,  
0.1735715514,-6.1816743121,0.5397820677\H,-2.8856594364,-4.9395976758,  
3.2946665941\H,-1.1249494253,-6.5677373966,2.6300346528\C,-5.150466419  
4,1.6243722264,-1.248979583\C,-3.0819938446,1.1623264917,-2.4080951555  
\C,-3.7662878202,1.1079872513,-3.6192553571\C,-5.148154431,1.307133969  
7,-3.6480516276\C,-5.8367383424,1.5635940631,-2.4624946288\H,-2.010573  
1256,0.9951989039,-2.3822703678\H,-3.2222582129,0.90069033,-4.53585290  
73\H,-5.6865924829,1.2567244734,-4.5896301098\H,-6.9127224034,1.709500  
5592,-2.4787998839\H,-5.6931340066,1.813803502,-0.3285665941\C,-3.2396  
380714,4.3305139261,0.0473982501\C,-0.9184309521,3.6645842824,0.080359  
0567\C,-0.5306388386,5.0001159124,-0.0545453093\C,-2.8544266426,5.6618  
760683,-0.0873426553\C,-1.4981876539,6.0002159029,-0.1232257418\H,-4.2  
945429281,4.075882386,0.044048963\H,-0.1674507551,2.8873391345,0.09497  
72694\H,0.5248911925,5.2424110442,-0.1168128178\H,-3.6121275008,6.4351  
979786,-0.1733166148\H,-1.2001539007,7.0393817127,-0.2250885125\C,-0.5  
043403515,-1.354639035,-2.7416870492\C,-1.7145803167,-3.44019326,-2.90  
48895533\C,-1.1322927201,-3.6779090274,-4.1487766614\C,0.0805616124,-1  
.5929127413,-3.9855471379\C,-0.2368825354,-2.7530861399,-4.691914609\H  
,-0.2443696387,-0.4687144482,-2.169748003\H,-2.3874887838,-4.175818697  
7,-2.4762388299\H,-1.3699325019,-4.5885026074,-4.6903540091\H,0.787729  
1443,-0.8779706044,-4.3932816291\H,0.2200962193,-2.9439231944,-5.65821  
73983\Pd,-1.0863083589,-0.0725260205,0.546663752\C,2.9878232228,3.4307  
629311,-0.1297370865\C,2.5651513434,2.4046444182,-1.1212046858\C,2.410  
7947413,1.1354529967,-0.7022301407\C,3.3751249234,2.9853220901,1.24375  
01436\C,3.2436180328,1.6848993294,1.5706885814\C,2.6825334152,0.632946  
9064,0.6822189786\H,2.0590198271,0.3782128876,-1.3889526789\H,3.501197  
2016,1.3318472418,2.5633546937\C,2.4002409238,2.8042462615,-2.59629904  
71\C,3.9006674953,4.0324352889,2.2348482107\O,3.0126670538,4.630913584  
1,-0.4368361431\C,1.9840442095,1.6002706648,-3.4594419383\C,1.33348188  
5,3.9009590037,-2.7913529605\H,2.7140123861,0.7870810394,-3.409474981\  
H,1.9045164339,1.917625795,-4.5039575238\H,1.004749865,1.2143581982,-3  
.1567321048\C,2.8061066794,5.0892248826,2.5096951224\H,2.5481791639,5.  
6297571491,1.5999176554\H,3.1617248352,5.8080633512,3.2566468034\H,1.9  
021204902,4.6119840721,2.9037516499\C,5.1607460215,4.7151326548,1.6566  
657571\H,4.9361505597,5.2268148183,0.7212246836\H,5.9468802662,3.97459  
96837,1.4712206027\H,5.5500478138,5.4475412403,2.3726971777\C,4.285092

5904,3.3926022434,3.5797573509\H,3.4264352285,2.9224834985,4.069817617  
4\H,4.6674882654,4.1675190607,4.2512473833\H,5.0691997756,2.636941249,  
3.4643001998\C,3.7010103163,-0.5997325872,0.6261209029\C,0.7488939721,  
-1.0131843801,0.7914510316\C,2.984615786,-1.9760372642,0.7366786221\C,  
1.5934004101,-2.0109930723,0.0575535628\H,1.6965392235,-1.789373628,-1  
.0124473924\H,1.2088360986,-3.0258442705,0.1250827587\C,4.6514973648,-  
0.4213560332,-0.5429980544\H,4.3001411701,-0.5254739478,1.5329780138\C  
,5.7825456766,0.3824600002,-0.3506113839\C,4.4218588485,-0.9447664261,  
-1.8234466881\C,5.2979280603,-0.671851307,-2.8747369326\C,6.6544918769  
,0.6659050467,-1.4006024526\C,6.4153872581,0.1377988842,-2.6706639002\  
H,7.0941085163,0.3526785386,-3.4904204541\H,5.1025035124,-1.093811169,  
-3.8563161193\H,5.9691278225,0.8006682521,0.6340317627\H,7.5211973143,  
1.29660124,-1.2262214077\H,3.5654945793,-1.582056273,-2.0069837105\C,3  
.8795725265,-3.0950937104,0.201616738\C,2.756658585,-2.2610522573,2.24  
07626174\C,1.2980025909,0.1597872212,1.1797457347\C,0.2707190335,1.015  
8320922,1.7994019146\H,0.3876030677,2.0940156628,1.7359156432\H,-0.027  
0462819,0.7064940405,2.8010556596\O,3.5957023529,-3.8510592185,-0.7023  
357795\O,5.0429058038,-3.1240876687,0.8810269549\C,6.0517110951,-4.048  
3788438,0.4104255576\C,6.8496154954,-3.4369464121,-0.7299786164\H,5.56  
31177558,-4.9765378097,0.1051239701\H,6.6757103366,-4.2355310364,1.286  
9091159\H,6.2149089098,-3.2844661065,-1.6046064676\H,7.6725419358,-4.1  
042469904,-1.0068316577\H,7.2645218247,-2.4690942461,-0.4368399953\O,3  
.1716640468,-1.5884216452,3.1602333244\O,2.03861683,-3.3871223096,2.38  
96690268\C,1.5370614949,-3.6651304426,3.718049653\C,0.3506013171,-2.77  
24553767,4.0441657463\H,1.2465426576,-4.7165759342,3.6743384043\H,2.35  
07186187,-3.5364797342,4.4365295438\H,-0.4157295144,-2.8601332592,3.27  
21354091\H,0.6620968573,-1.72803165,4.1051599653\H,-0.0777532318,-3.06  
87509798,5.0080743128\H,0.3541791549,3.5599970834,-2.4418465029\H,1.24  
53027,4.1413831568,-3.8571792744\H,1.598634891,4.8070247947,-2.2501374  
723\C,3.7699804833,3.3069778079,-3.1092726292\H,4.5310042945,2.5276928  
63,-2.9993400629\H,4.0898054405,4.1909314637,-2.5558973048\H,3.6979061  
999,3.5706757291,-4.1706471957\

## Product

```
1\1\GINC-OMC-1-822\SP\RB3LYP\def2TZVP\C32H40O5\SHIMGRP\16-Mar-2023\0\  
#p sp b3lyp/def2tzvp empiricaldispersion=gd3bj scrf=(smd,solvent=aceto  
nitrile)\product\0,1\C,0,3.263069,-0.397865,-0.183835\C,0,2.699299,0  
.542674,0.831696\C,0,1.404614,0.427482,1.167965\C,0,2.412557,-1.532022  
, -0.662951\C,0,1.129382,-1.589934,-0.269962\C,0,0.455445,-0.567574,0.5  
80602\H,0,0.971473,1.104865,1.892813\H,0,0.471527,-2.381078,-0.609288\  
C,0,3.606163,1.632264,1.417717\C,0,3.031877,-2.577475,-1.599223\O,0,4.  
412326,-0.252539,-0.607237\C,0,2.867071,2.470733,2.474623\C,0,4.839607  
,0.992254,2.091443\H,0,2.009222,2.998371,2.045941\H,0,3.550664,3.22369  
6,2.878006\H,0,2.517594,1.858042,3.312621\C,0,4.259503,-3.227754,-0.92
```

2819\H,0,5.02995,-2.487956,-0.708797\H,0,4.68314,-3.993249,-1.582025\H  
,0,3.968508,-3.713811,0.014665\C,0,3.453789,-1.902802,-2.92411\H,0,4.1  
98269,-1.127105,-2.74904\H,0,2.585467,-1.452697,-3.418202\H,0,3.876748  
, -2.650814,-3.60382\C,0,2.030074,-3.695794,-1.933259\H,0,1.693814,-4.2  
22373,-1.034107\H,0,2.512956,-4.427971,-2.587331\H,0,1.147601,-3.31512  
, -2.457359\C,0,-0.670177,0.155653,-0.325451\C,0,-0.367867,-1.184991,1.  
724908\C,0,-2.018104,-0.072834,0.431788\C,0,-1.628845,-0.375458,1.8952  
61\H,0,-1.433203,0.574195,2.406233\H,0,-2.414039,-0.891402,2.447912\C,  
0,-0.281487,1.565993,-0.700885\H,0,-0.737141,-0.416718,-1.249152\C,0,0  
.396275,1.752345,-1.911112\C,0,-0.467,2.674524,0.136954\C,0,0.003682,3  
.933093,-0.234501\C,0,0.881185,3.006392,-2.278527\C,0,0.684136,4.10400  
7,-1.440751\H,0,1.058017,5.082938,-1.72383\H,0,-0.155523,4.779834,0.42  
6182\H,0,0.559233,0.898293,-2.561933\H,0,1.41202,3.124753,-3.21801\H,0  
, -0.982902,2.565637,1.083678\C,0,-3.006104,1.081385,0.316389\C,0,-2.70  
0138,-1.326807,-0.139647\C,0,-0.042139,-2.272525,2.369043\C,0,0.299119  
, -3.363419,3.000893\H,0,-0.00562,-4.345214,2.645428\H,0,0.904772,-3.33  
2179,3.903835\O,0,-3.373739,1.780143,1.235142\O,0,-3.406655,1.215381,-  
0.95975\C,0,-4.377802,2.256812,-1.224774\C,0,-5.782569,1.767626,-0.916  
088\H,0,-4.247368,2.483688,-2.28426\H,0,-4.117888,3.134389,-0.629264\H  
,0,-6.01043,0.864546,-1.489655\H,0,-6.513611,2.538269,-1.179885\H,0,-5  
.882536,1.545995,0.148773\O,0,-2.205011,-2.117341,-0.91228\O,0,-3.9341  
52,-1.454113,0.376672\C,0,-4.705958,-2.592635,-0.076666\C,0,-6.095779,  
-2.448545,0.506733\H,0,-4.710512,-2.59582,-1.170093\H,0,-4.205926,-3.5  
06551,0.257678\H,0,-6.564325,-1.521665,0.164558\H,0,-6.060815,-2.43400  
5,1.599367\H,0,-6.720146,-3.289654,0.191506\H,0,4.532165,0.324219,2.90  
352\H,0,5.474756,1.774457,2.521319\H,0,5.428675,0.422083,1.373881\C,0,  
4.052084,2.588704,0.287254\H,0,3.181069,3.047787,-0.19054\H,0,4.628444  
,2.057799,-0.469457\H,0,4.673976,3.388244,0.705507\

### DFT calculation data of **condition B**

#### **1b**

1\1\GINC-OMC-1-821\Freq\RB3LYP\6-31G(d,p)\C11H14O4\SHIMGRP\15-Mar-2023  
\0\#P Geom=AllCheck Guess=TCheck SCRF=Check GenChk RB3LYP/6-31G(d,p)  
Freq\|a\_opt\_freq\0,1\C,-0.0361470929,-0.0906203327,0.2023579826\C,-0  
.0768257244,0.5907997647,1.5882653195\C,0.1170200923,1.389736574,0.382  
8696507\H,0.7857299631,0.4157454384,2.2257603738\H,-1.0422180613,0.613  
0526756,2.0834631236\C,0.2675488934,2.5097533679,-0.2372482733\C,0.426  
9957457,3.6408925886,-0.8743666869\H,1.4174439663,4.040171376,-1.07787  
76359\H,-0.4234902704,4.2199253867,-1.2252545306\C,1.1648362692,-0.945  
78492,-0.0996360407\C,-1.3120817112,-0.5273090243,-0.4693894916\O,-2.3  
853654591,-0.3449821699,0.3278336678\O,2.3119695443,-0.2873978366,0.16  
49535224\O,1.110892462,-2.0953347855,-0.4709618538\O,-1.3718702167,-0.  
9339658871,-1.6059773221\C,-3.6652890299,-0.6304991325,-0.2823843391\C  
, -4.733024857,-0.322705741,0.7468236109\H,-3.677745537,-1.6792805865,-

0.5927556151\H,-3.7679110396,-0.0187296945,-1.1836637485\H,-4.60319286  
66,-0.9406403185,1.6396386839\H,-5.7227866298,-0.5266580429,0.32766932  
46\H,-4.6951276853,0.7286820781,1.0454315125\C,3.5238781125,-1.0573040  
76,-0.0069107532\C,4.6850917763,-0.1471579062,0.3357933454\H,3.5674774  
941,-1.4142090471,-1.0398805116\H,3.4790800702,-1.9363001085,0.6435051  
888\H,4.701464532,0.725678667,-0.3224589009\H,5.6287164808,-0.68792692  
72,0.2171789378\H,4.6150867791,0.20235762,1.3696734589\

## PdL<sub>n</sub>

1\1\GINC-OMC-1-812\Freq\RB3LYP\GenECP\C27H22N1O1P1Pd1\SHIMGRP\23-Aug-2  
023\0\#P Geom=AllCheck Guess=TCheck SCRF=Check GenChk RB3LYP/GenECP F  
req\lezuolin\0,1\C,-1.2176142098,-2.4601602993,-1.9697650525\C,-1.538  
4434931,-3.7908667466,-2.2324298405\C,-1.5615063843,-1.879062146,-0.74  
30532353\C,-2.2175037945,-2.6511477789,0.2227491495\C,-2.5332602917,-3  
.9847709782,-0.0390867321\C,-2.1966343711,-4.5560794553,-1.2673437702\  
H,-0.6766931213,-1.8654751862,-2.7010429085\H,-1.265662053,-4.23401379  
81,-3.1859057712\H,-3.0381947215,-4.5783282816,0.7176537025\H,-2.44022  
11364,-5.5951496836,-1.4688630584\H,-2.4709936868,-2.2133263225,1.1832  
155053\P,-1.135452551,-0.1138802157,-0.4799856653\C,-2.7269434901,0.74  
26851663,-0.8478575983\C,-1.0433390228,0.0334298527,1.3724362528\C,-3.  
9718861343,0.0999611829,-0.8826160661\C,-2.6637258828,2.1178693346,-1.  
1214580814\C,-3.8221956237,2.8402300679,-1.400798447\C,-5.130137398,0.  
8219391088,-1.1759741616\C,-5.0592142977,2.1921972672,-1.4302289263\H,  
-4.035556648,-0.9642755096,-0.6842094769\H,-1.6942720947,2.6097752213,  
-1.1214378766\H,-3.7589165328,3.9044735892,-1.6079501268\H,-5.96186454  
5,2.7511481048,-1.658742794\H,-6.0886293324,0.311801854,-1.2060439804\  
C,-2.1143301725,0.5993213581,2.0796578\C,0.1218207965,-0.3080540516,2.  
105702645\C,0.1928784019,-0.044354724,3.4802721162\C,-0.8847946075,0.5  
164440571,4.1585242999\C,-2.0446654428,0.830637879,3.4535073174\H,1.10  
6931672,-0.2932541764,4.0077785443\H,-0.8178227747,0.7057785894,5.2252  
201212\H,-2.897360603,1.2654736909,3.9665578299\H,-3.01652173,0.873228  
8138,1.5468230373\C,1.2922963368,-0.9322767961,1.4717821499\O,2.515562  
0425,-0.5473629324,1.9661282598\C,3.4871167325,-1.3541130124,1.2579457  
001\N,1.2737303691,-1.7587149703,0.4991994183\C,2.6851626505,-1.949328  
7869,0.0737954376\H,3.8546202055,-2.129021613,1.9387824302\H,4.3141101  
105,-0.7089848544,0.9578931548\Pd,0.6751672254,0.6037098531,-1.6459123  
024\H,2.8855820839,-3.0168740284,-0.0489260787\C,2.8684456223,-1.24752  
87198,-1.2555442944\C,2.9053793469,-1.9624818228,-2.4437342133\C,2.847  
2708893,0.1748628889,-1.2960927777\C,2.8697214282,-1.30208017,-3.68633  
84109\H,2.9187372941,-3.0485514825,-2.410083636\C,2.8022535296,0.84426  
68499,-2.5434130815\H,3.0033859779,0.7413450493,-0.3822806779\C,2.7919  
124284,0.0821161058,-3.7388278536\H,2.8886003762,-1.8809080418,-4.6045  
682472\H,2.9232600864,1.922744515,-2.589179162\H,2.7577454011,0.594149  
2844,-4.6954786472\

**PdL<sub>n</sub>'**

1\1\GINC-OMC-1-806\Freq\RB3LYP\GenECP\C27H22N1O1P1Pd1\SHIMGRP\27-Jul-2023\0\#P  
Geom=AllCheck Guess=TCheck SCRF=Check GenChk RB3LYP/GenECP Freq\ezuolin\0,1\C,-2.6115769641,-0.0442822679,1.1606814973\C,-3.3115768089,-1.1772842822,0.7486160949\C,-1.7724532875,0.6409672566,0.2691698133\C,-1.6607359669,0.1759336782,-1.0489946251\C,-2.3697680623,-0.9527618931,-1.4640083206\C,-3.1941720371,-1.6326766662,-0.5665451977\H,-2.7173289511,0.3306371202,2.1747627587\H,-3.9561194335,-1.698815775,1.450307195\H,-2.2768266921,-1.3003202437,-2.4889835478\H,-3.746307011,-2.5097443131,-0.8912594296\H,-1.0204642892,0.6968147266,-1.753202726\H,-0.8845767526,2.1322569515,0.9010765268\C,0.7739857327,1.4469791089,1.3340387576\C,-0.5181061691,3.0025333197,-0.7151049804\C,1.2640562897,0.2186549773,0.8673697086\C,1.5664269272,2.2087532606,2.2054503683\C,2.833574917,1.7668338478,2.582229942\C,2.5247807159,-0.2320794392,1.2604542221\C,3.3141652853,0.5423018575,2.1126193036\H,0.6602260913,-0.3849678316,0.1981330298\H,1.17112116,3.1455106414,2.5905144651\H,3.4393813807,2.3691945993,3.2529781018\H,4.2953720137,0.1894228804,2.4162872334\H,2.8919141368,-1.1883171929,0.8984347445\C,0.7885160144,3.009885233,-1.2201324878\C,-1.5239788137,3.6504075241,-1.4862911226\C,-1.1895808204,4.2293720073,-2.7204991695\C,0.1201540149,4.228958784,-3.1927530779\C,1.1137239246,3.6225825768,-2.4314888553\H,-1.9766277223,4.6925303425,-3.3039658524\H,0.3547705326,4.6965368828,-4.1436358074\H,2.1424955254,3.6090378208,-2.7793800741\H,1.5710857426,2.5160601768,-0.6578165816\C,-2.9470474999,3.7934880128,-1.0998147458\O,-3.8295728484,3.7389649352,-2.1412492853\C,-5.1077662652,4.1650287838,-1.6092922714\N,-3.452728245,4.0200177781,0.0618644486\C,-4.9198315162,4.0562426674,-0.0779823541\H,-5.8820172435,3.5132055414,-2.0145429651\H,-5.286642552,5.1987401886,-1.9250331656\Pd,-2.2919816123,3.5250060367,1.8834911972\H,-5.306987641,3.0966110088,0.2890413432\C,-5.5652791775,5.1748328531,0.7019479328\C,-6.8860037086,5.0448461727,1.142512628\C,-4.8722104957,6.3632725758,0.9579489967\C,-7.5119178825,6.0900040833,1.8221682832\H,-7.4242720708,4.1182354291,0.9582447067\C,-5.4954235897,7.4061706528,1.6432396933\H,-3.8402526461,6.4539675972,0.6353985307\C,-6.8167119393,7.2737580695,2.0741207045\H,-8.5372011219,5.976699617,2.1614346167\H,-4.9464256795,8.321161211,1.8450058623\H,-7.299716188,8.0855773967,2.6094946563\

**1a**

1\1\GINC-OMC-1-823\Freq\RB3LYP\6-31G(d,p)\C21H26O1\SHIMGRP\12-Mar-2023\0\#P  
Geom=AllCheck Guess=TCheck SCRF=Check GenChk RB3LYP/6-31G(d,p) Freq\tBu\0,1\C,-1.9790887033,0.4659820702,0.0592738551\C,-1.9163827593,-1.0227800638,0.0178032087\C,-0.7012414366,-1.6164766211,-0.0572623836\C,0.5453484547,-0.8784017412,-0.0790122614\C,0.4646266705,0.565930

6117,-0.1349711184\C,-0.7101946451,1.2388907627,-0.0787292571\H,-0.618  
1052224,-2.6975195781,-0.0708189992\H,1.3903449399,1.1057151492,-0.271  
3118489\C,-0.7810081114,2.7673593888,-0.1640759827\C,-3.2233004167,-1.  
8213156892,0.0732249536\C,-1.3831235633,3.3327475228,1.1434393088\H,-2  
.3931748641,2.957678886,1.3022207223\H,-1.4160972835,4.4265611162,1.09  
17295315\H,-0.7645814112,3.0542938668,2.0035274125\C,-1.6528504088,3.1  
879069279,-1.3693830146\H,-2.6710790117,2.815011083,-1.2663327163\H,-1  
.2295250679,2.8036719684,-2.3036595059\H,-1.6848782866,4.2806383339,-1  
.4382496622\C,0.6129407109,3.3911219839,-0.3500370006\H,1.2791736229,3  
.1657010213,0.4894616071\H,0.5148924246,4.4790512445,-0.4083839785\H,1  
.0947346232,3.0523951576,-1.2731288177\C,-4.125857448,-1.4285878408,-1  
.1191139888\H,-4.3811020434,-0.3702082162,-1.0852763703\H,-5.051153850  
6,-2.0141817599,-1.0902084645\H,-3.6228785835,-1.6396262634,-2.0689628  
792\C,-3.9561795541,-1.5347045574,1.4040656019\H,-4.2048678625,-0.4780  
761686,1.4936126761\H,-3.332202288,-1.8234442694,2.2567047654\H,-4.881  
2687942,-2.1197812441,1.4496324994\C,-2.9669356357,-3.3357455503,-0.00  
85649611\H,-2.4645604581,-3.6163131696,-0.9403385575\H,-3.9239063757,-  
3.8647715438,0.0227894357\H,-2.3643933899,-3.6958464123,0.831912826\O,  
-3.0636203466,1.0503733983,0.1816231985\C,1.7219389762,-1.5783245977,-  
0.0802077073\C,3.0894628898,-1.0824302304,0.01757761\H,1.6370853848,-2  
.6595922437,-0.1824342362\C,3.4478971129,0.053596529,0.7707864055\C,4.  
771623728,0.4787035171,0.8284159743\C,5.7682388664,-0.221397168,0.1460  
474601\C,4.1143189383,-1.7990751491,-0.6317568718\C,5.4348874301,-1.36  
70899715,-0.579805146\H,2.6908989183,0.5747252707,1.3446103622\H,3.857  
5567747,-2.6916282984,-1.1951625618\H,6.2064461032,-1.9259290046,-1.10  
0141865\H,5.028703891,1.3517142313,1.4201852572\H,6.7997733619,0.11289  
83113,0.1939444849\

### Int0-B

1\1\GINC-OMC-1-816\Freq\RB3LYP\GenECP\C38H36N1O5P1Pd1\SHIMGRP\06-Oct-2  
023\0\#P Geom=AllCheck Guess=TChef SCRF=Check GenChk RB3LYP/GenECP F  
req\lezuolin\0,1\C,2.5262472174,-1.2646778844,2.384484141\C,2.8117006  
541,-2.3347525011,3.2319105988\C,3.1907239891,-1.1367969275,1.15682505  
11\C,4.1347728326,-2.1025240021,0.7832121467\C,4.4190003811,-3.1734790  
071,1.6315130902\C,3.7587469421,-3.2902499299,2.8562306434\H,1.7683002  
296,-0.5352370879,2.6553672336\H,2.2869731354,-2.4287688366,4.17790942  
15\H,5.1504435033,-3.9190774193,1.3338600765\H,3.9760700317,-4.1276574  
381,3.5125461215\H,4.6347035242,-2.0242724841,-0.1774856177\H,2.708170  
9272,0.2609479959,0.0709361228\C,4.0777302784,1.4691773199,0.183455962  
3\C,2.9197759812,-0.4744724315,-1.6237096548\C,5.3719038967,1.15481061  
13,0.6197073118\C,3.7757238399,2.7886709868,-0.1891773777\C,4.76254288  
33,3.7725741407,-0.1478080914\C,6.3528868189,2.1454056296,0.671618465\  
C,6.0515987333,3.4524655569,0.2836452794\H,5.6098029471,0.1408761492,0  
.9235110319\H,2.7636504445,3.0317101414,-0.5021808666\H,4.5221058585,4

.7902521431,-0.4405312203\H,6.8176519371,4.2210724158,0.325408489\H,7.3525640731,1.896609402,1.0155516785\C,3.9298333848,-0.0201595678,-2.4765586987\C,2.0204774987,-1.4593373766,-2.1175708342\C,2.1687660711,-1.9561240052,-3.4179195908\C,3.1778859373,-1.4804635477,-4.2522723776\C,4.0583227768,-0.5114613379,-3.7782561831\H,1.4787505023,-2.7168226727,-3.7642470274\H,3.2739759761,-1.8666538649,-5.2618697957\H,4.8525618083,-0.13508282,-4.4160295154\H,4.6270500128,0.7290855077,-2.1203121723\C,0.9573066657,-2.0300280123,-1.276588575\O,0.5049061959,-3.2670062208,-1.6112814398\C,-0.6101915695,-3.5111684536,-0.7021615011\N,0.4674448821,-1.5111764447,-0.2075732703\C,-0.2701560046,-2.5934419869,0.4809033711\H,-0.6231668065,-4.5763824198,-0.4759434497\H,-1.5360100196,-3.1935169495,-1.1914853882\Pd,0.4563616972,0.8159320917,-0.1296205471\H,0.4830352796,-3.0915991586,1.1134877361\C,-1.4273530025,-2.2271776974,1.3781457511\C,-1.7214635146,-0.915779854,1.7549961259\C,-2.2069711174,-3.2701048017,1.9000358859\C,-2.7944621408,-0.6412108158,2.6044610878\H,-1.1265333784,-0.0970544157,1.3605843162\C,-3.2670872248,-3.0022284205,2.7656375631\H,-1.9817231997,-4.3004075093,1.6354312674\C,-3.5668989963,-1.6840724503,3.1165093297\H,-3.0401057559,0.3920730735,2.8227138381\H,-3.8609738514,-3.8219764044,3.1594876464\H,-4.3999686917,-1.4720272249,3.7800263339\C,-2.6999679712,1.5892083573,-0.7054493107\C,-1.9996678463,2.0525936745,-1.9952746422\C,-1.20480788,1.8686835188,-0.7688940523\H,-2.2075660437,3.0677067304,-2.3206819691\H,-1.9556104212,1.2965556658,-2.7736140455\C,-0.307222597,2.6720523336,-0.0712437775\C,-0.0059018174,3.8571175573,0.445958449\H,0.937410261,4.0362987741,0.9534600679\H,-0.7030888357,4.6911948287,0.3873559765\C,-3.4697148456,2.5342216775,0.1601259076\C,-3.1415690329,0.1578676234,-0.7672494641\O,-4.3444930993,-0.0275580844,-0.2029658732\O,-3.763349792,3.691391643,-0.477396984\O,-3.7502087184,2.3213097325,1.3233342977\O,-2.5213350137,-0.7248829373,-1.3331179551\C,-4.8456665545,-1.3815795937,-0.2154702531\C,-6.1529073307,-1.377532816,0.5494965853\H,-4.1040861782,-2.0324055319,0.2513133312\H,-4.9736892981,-1.7000804629,-1.2553606868\H,-5.9878874474,-1.0420582218,1.5759735208\H,-6.5709904384,-2.3887053733,0.5769893895\H,-6.8824542487,-0.7126235216,0.0783228214\C,-4.4217137755,4.7015208038,0.3195842154\C,-3.4167274644,5.5291523232,1.1041701288\H,-5.1320927251,4.2109275875,0.9886443351\H,-4.9650126914,5.3103291994,-0.4068807001\H,-2.8620787381,4.8940365882,1.798159136\H,-3.9373559601,6.3020000464,1.6794866847\H,-2.7086382706,6.0209712343,0.430846464\

**TS1-B**

1\1\GINC-OMC-1-813\Freq\RB3LYP\GenECP\C38H36N1O5P1Pd1\SHIMGRP\08-Nov-2023\0\#p freq geneep b3lyp empiricdispersion=gd3bj geom=check guess =read\TS2\0,1\C,-2.4714846701,-1.0368433208,-2.91018547\C,-3.0468368627,-1.8873750851,-3.8532886687\C,-2.8079236574,-1.1486961425,-1.5534149567\C,-3.7286538268,-2.1272537475,-1.1578508622\C,-4.2972683539,-2.9

840195028,-2.101629706\C,-3.9577277186,-2.8661690963,-3.4503025523\H,-  
1.7455562041,-0.2894702987,-3.2174865043\H,-2.7780074546,-1.7905503695  
,-4.9010322172\H,-5.0082529653,-3.7405960259,-1.782721182\H,-4.4010133  
612,-3.5332320027,-4.1836550362\H,-4.0030807072,-2.2190103162,-0.11215  
55474\H,-2.0267624894,0.0123376193,-0.352497158\C,-3.2781053537,1.3578  
576688,-0.2552487293\C,-2.1720214446,-0.9250514655,1.2142865564\C,-4.4  
919080473,1.2772525487,-0.9569061622\C,-2.9912142888,2.5200557625,0.48  
18447669\C,-3.910606633,3.5676927455,0.5227770381\C,-5.4008105273,2.33  
4566443,-0.9180513954\C,-5.1146352415,3.4818351042,-0.177965308\H,-4.7  
310380598,0.3921477108,-1.5335206967\H,-2.0575129538,2.5821426753,1.02  
93842281\H,-3.6788108617,4.4570366332,1.1015295447\H,-5.8240486187,4.3  
036935567,-0.1495594834\H,-6.3349222905,2.2574955097,-1.4668160615\C,-  
2.9878989166,-0.4451506382,2.246579111\C,-1.421683949,-2.1117928143,1.  
4407251111\C,-1.5451354749,-2.7777459474,2.674752247\C,-2.362547931,-2  
.282161802,3.6822791021\C,-3.0829024354,-1.1065757353,3.4676366343\H,-  
0.9739515268,-3.6827440188,2.8354367489\H,-2.4328272754,-2.8081960311,  
4.6287758434\H,-3.7240353066,-0.7055641674,4.2466538425\H,-3.552272034  
4,0.4653366487,2.0879383364\C,-0.4654971757,-2.6813130267,0.4801417169  
\O,0.0660057636,-3.8804280377,0.8414581684\C,0.9998959675,-4.274106186  
5,-0.1894901432\N,-0.0196248723,-2.1763903355,-0.623608132\C,1.0488883  
762,-3.0530085207,-1.1454551717\H,0.6139283167,-5.1785165075,-0.667245  
8863\H,1.9604075254,-4.4846336258,0.2837036903\Pd,0.2006514403,-0.0118  
423256,-1.1206452285\H,0.7916243816,-3.3436205659,-2.1683038487\C,2.37  
94621108,-2.3299740419,-1.1558009774\C,3.2741746501,-2.5239765942,-2.2  
103455142\C,2.7316274075,-1.471584044,-0.1046583684\C,4.5100487108,-1.  
8761238962,-2.2120258489\H,2.9996990684,-3.1759344858,-3.0361831226\C,  
3.9641408725,-0.8193859019,-0.1054429528\H,2.0440687089,-1.2806147473,  
0.7110425637\C,4.8550467143,-1.0251938105,-1.1598479207\H,5.1994179024  
,-2.0309519843,-3.0369830538\H,4.1945736602,-0.1270557167,0.6974517503  
\H,5.8132763726,-0.5156805749,-1.1686594828\C,1.5229402996,2.338361258  
5,0.5765109743\C,0.7165015932,3.011240466,-0.5213664681\C,0.899316817,  
1.8224423745,-1.3778741548\H,1.1808232157,3.9145227201,-0.9159525904\H  
,-0.3154743413,3.1861855694,-0.2231970418\C,1.678495059,1.3115296227,-  
2.3033303291\C,2.7115009909,0.9466258192,-3.056301822\H,2.609205878,0.  
2538669962,-3.8866451485\H,3.714870425,1.3159967771,-2.8472305398\C,2.  
9642514356,2.4803664409,0.6073606133\C,0.7894517388,1.6037926921,1.588  
6762732\O,1.5105430806,0.6636884317,2.2560709104\O,3.41663847,3.235879  
707,-0.4545774716\O,3.7408203667,2.062189541,1.4592876757\O,-0.4079074  
75,1.7741539803,1.8379309429\C,0.8466491969,0.0216997878,3.3590796518\  
C,1.5909675483,-1.2652269355,3.660256629\H,-0.1962240755,-0.1648661818  
,3.1027020072\H,0.8648068909,0.70139761,4.2196303588\H,1.5068252834,-1  
.9714855186,2.8289934201\H,1.1627221532,-1.7409830137,4.5482714842\H,2  
.6513554847,-1.0710450941,3.8427977152\C,4.7905722998,3.6465507344,-0.  
3868036965\C,5.7462919414,2.5831067153,-0.9059137203\H,5.0365270712,3.



9001606124,0.6479013189\H,4.8380576876,4.5503706485,-1.0008792372\H,5.  
7012285339,1.7002981846,-0.2675943549\H,6.7722463445,2.9675089538,-0.9  
00738588\H,5.495439626,2.2955809317,-1.931343463\

### Int1-B

1\1\GINC-OMC-1-818\Freq\RB3LYP\GenECP\C38H36N1O5P1Pd1\SHIMGRP\06-Oct-2  
023\0\#P Geom=AllCheck Guess=TChef SCRF=Check GenChk RB3LYP/GenECP F  
req\ezulin\0,1\C,2.6157256004,-0.9786479066,2.219194408\C,2.9517738  
351,-2.0792487743,3.0068459696\C,3.2436429385,-0.7824346071,0.98142576  
39\C,4.2036078875,-1.7003809211,0.5342823053\C,4.5343396371,-2.8015816  
185,1.3235383369\C,3.9099686921,-2.9907856308,2.5588238968\H,1.8442225  
15,-0.2866598176,2.5436837257\H,2.452370419,-2.2318391392,3.958288997\  
H,5.2737048139,-3.5146062888,0.9721998228\H,4.1646776469,-3.8529636126  
,3.1674000777\H,4.6807555298,-1.5589859151,-0.4306292744\P,2.737871180  
7,0.6516415991,-0.0253371835\C,4.0796393042,1.8770895048,0.1227279496\  
C,2.8363743641,0.0537377058,-1.7800582455\C,5.2170029298,1.6475900469,  
0.9070426163\C,3.9366398031,3.1058012661,-0.543571991\C,4.9241232454,4  
.0812862487,-0.4377789396\C,6.1981779799,2.6341952404,1.0203398735\C,6  
.0558147947,3.8479186372,0.3486337707\H,5.3359846976,0.7037210589,1.42  
7113572\H,3.0564588117,3.2877639566,-1.1525116726\H,4.8082239957,5.025  
1256958,-0.9613237745\H,6.8211864633,4.6124099731,0.4385703312\H,7.075  
0829916,2.4504193636,1.6333509447\C,3.8338678356,0.5137124336,-2.64271  
88053\C,1.868501752,-0.8516527311,-2.291271456\C,1.9235702672,-1.26316  
50508,-3.6250630664\C,2.913346278,-0.7723005778,-4.4759522168\C,3.8698  
725279,0.1098796536,-3.9811346331\H,1.1816296331,-1.9682673383,-3.9825  
165\H,2.938440024,-1.0848307361,-5.5145838202\H,4.6529494468,0.4873698  
704,-4.6313677989\H,4.5904928155,1.1954888422,-2.2731836983\C,0.869127  
868,-1.4630609635,-1.4010909383\O,0.511112218,-2.7285315706,-1.6506482  
619\C,-0.513353684,-3.0342141173,-0.6276145577\N,0.4122625507,-0.93903  
24647,-0.3131259966\C,-0.1034187056,-2.0796379473,0.4977528988\H,-0.41  
92711439,-4.0903606193,-0.3818308729\H,-1.4888587484,-2.7667578133,-1.  
0463206354\Pd,0.5388948232,1.1689295727,0.050918854\H,0.7825347524,-2.  
4934125137,1.0011909857\C,-1.133575848,-1.8031139821,1.5540170569\C,-1  
.2259593861,-2.7067089485,2.6226075719\C,-2.0280509227,-0.7366462631,1  
.4830033248\C,-2.2252865413,-2.5609093902,3.5824371378\H,-0.5182134197  
, -3.530060095,2.6943611066\C,-3.0427262121,-0.5953111934,2.4330571112\  
H,-1.9798119574,-0.0404268043,0.6592077592\C,-3.141277631,-1.509775205  
3,3.4817203664\H,-2.294330396,-3.2700774184,4.4023479693\H,-3.78202848  
56,0.1877844572,2.301732954\H,-3.9350684873,-1.4092056091,4.2159304156  
\C,-3.6665063218,0.8101729225,-0.9434271004\C,-2.6125003648,1.53869900  
44,-1.7420573618\C,-1.5463172041,2.1345413534,-0.9230907875\H,-3.03038  
55067,2.3688156507,-2.3284814288\H,-2.1595460814,0.8264617376,-2.43871  
95199\C,-0.8042097573,2.8861651595,-0.2706293746\C,0.3937734684,3.2278  
888794,0.3938953015\H,1.1137828349,3.8382658531,-0.1475950031\H,0.3477

996903,3.4587814771,1.4583505489\C,-4.4853769024,1.5545455511,-0.04293  
67982\C,-3.63799922,-0.6055019629,-1.0418994189\O,-4.6156553433,-1.251  
0962744,-0.3381357788\O,-4.2573186051,2.9294517937,-0.2167751846\O,-5.  
2753379756,1.1722576008,0.8198980938\O,-2.7905197886,-1.262798788,-1.6  
864679891\C,-4.4999017761,-2.6677315842,-0.2448198017\C,-5.6376122837,  
-3.1434890045,0.6410760308\H,-3.5318385786,-2.9331584326,0.1974502981\  
H,-4.5408734625,-3.1195735497,-1.2431238206\H,-5.5585975708,-2.6847154  
559,1.6302726872\H,-5.6053235143,-4.2326308712,0.7537572307\H,-6.60404  
01646,-2.8639662965,0.2121619345\C,-4.8479376605,3.7783008123,0.765014  
2166\C,-3.9582625463,3.8933601441,1.9980251033\H,-5.8315192842,3.38921  
26161,1.0408006358\H,-4.9671046552,4.75103961,0.27652874\H,-3.86466138  
95,2.916634981,2.4796201277\H,-4.3850408374,4.5966657702,2.7223953408\  
H,-2.9586124792,4.2430394913,1.7196436239\

### Int1'-B

1\GINC-OMC-1-824\Freq\RB3LYP\GenECP\C38H36N1O5P1Pd1\SHIMGRP\07-Oct-2  
023\0\#P Geom=AllCheck Guess=TCheck SCRF=Check GenChk RB3LYP/GenECP F  
req\lezuolin\0,1\C,1.5520818031,-0.9603920131,2.5539090622\C,1.902105  
7155,-1.8585851836,3.5623580898\C,2.0989084966,-1.0939019679,1.2693921  
222\C,2.9920437392,-2.1403314034,1.0033448354\C,3.3350684776,-3.040742  
1235,2.0118031272\C,2.7912991382,-2.9005212936,3.2907253895\H,0.845517  
752,-0.1579633536,2.7480695845\H,1.4761419019,-1.7491782011,4.55512368  
99\H,4.0242693587,-3.852475545,1.7994678721\H,3.0579940492,-3.60454461  
83,4.0731654924\H,3.4106463502,-2.252440232,0.0079975999\H,1.560820483  
2,0.1002405026,-0.0083621182\C,2.9270554076,1.2859316128,-0.2023221839  
\C,1.6001474203,-0.9071028607,-1.5633439358\C,4.0699063827,1.251322188  
2,0.6045903108\C,2.7781938447,2.3097148059,-1.1531945751\C,3.773416085  
2,3.2715790645,-1.3028038699\C,5.0574198666,2.227229131,0.4599928912\C  
,4.9123007101,3.2351609946,-0.4928463929\H,4.1876864187,0.4682646504,1  
.3456798312\H,1.8784673504,2.3563373884,-1.756978998\H,3.652000996,4.0  
594717607,-2.039614991\H,5.6809391442,3.9941896398,-0.6026569784\H,5.9  
391903578,2.1976341889,1.0928442798\C,2.5437706726,-0.6761744821,-2.56  
72537323\C,0.6366589247,-1.9236855228,-1.7714257758\C,0.6466407462,-2.  
6794832023,-2.9475780093\C,1.5782365219,-2.413196496,-3.9492917499\C,2.  
.5263678934,-1.4119412833,-3.7549866239\H,-0.0869643069,-3.4682523377,  
-3.0702512442\H,1.5652660964,-2.9885818391,-4.8690542942\H,3.263364893  
8,-1.2019006815,-4.5239416346\H,3.2970973281,0.0890463677,-2.425102377  
6\C,-0.3419014007,-2.2634896634,-0.7263847884\O,-0.5723805655,-3.58580  
18249,-0.5459652511\C,-1.584316249,-3.6687608804,0.4950710134\N,-0.935  
0345821,-1.4519025778,0.0761749183\C,-1.5539585411,-2.2701309076,1.148  
0646832\H,-1.3160142905,-4.4842249919,1.1658738077\H,-2.5496399907,-3.  
8683662156,0.0199735257\Pd,-0.6376957356,0.7523536031,-0.0170816409\H,  
-0.8455115027,-2.2583024515,1.9868122376\C,-2.906666036,-1.8384631874,  
1.6416834866\C,-3.2154046246,-2.0017366935,2.9973923102\C,-3.890416427  
6,-1.391274649,0.7564956429\C,-4.5038200403,-1.7424931687,3.4631221279

\H,-2.4450818747,-2.3395915947,3.6866913314\C,-5.1771038981,-1.1252951  
553,1.2255637548\H,-3.6476338052,-1.2134249623,-0.2852673584\C,-5.4892  
503066,-1.3102050373,2.5731123579\H,-4.7354933982,-1.8715513341,4.5161  
593623\H,-5.9168067081,-0.7436976543,0.531979764\H,-6.4922227979,-1.10  
11608831,2.9332371379\C,-2.3571442935,1.6952886992,-1.0090874554\C,-1.  
6285280154,3.0624366819,-0.9618465644\C,-0.4557717985,2.7390437867,-0.  
0910227395\H,-2.2570429023,3.8619094779,-0.5584322962\H,-1.3171862819,  
3.3287977964,-1.9768791046\C,0.3753627447,3.4259695368,0.6246226674\C,  
1.2580784624,4.0805140375,1.3510073966\H,2.2205207691,4.3806882476,0.9  
411210666\H,1.0575406999,4.3517046165,2.385685266\C,-3.6420117372,1.64  
31065959,-0.2894340402\C,-2.2412810856,0.9870031615,-2.3005432748\O,-2  
.8347129293,-0.2444930906,-2.2947625903\O,-3.5343689126,2.2779938568,0  
.9173439607\O,-4.690757647,1.1591562007,-0.6835955856\O,-1.6164188327,  
1.382663432,-3.2760526293\C,-2.6727476806,-1.0165745888,-3.4916584507\  
C,-3.1886646726,-2.4138187075,-3.1996746016\H,-1.6170236591,-1.0244997  
411,-3.7788545948\H,-3.2314555336,-0.5450988957,-4.307495789\H,-2.5976  
552929,-2.8933774676,-2.4131752077\H,-3.1276539378,-3.0348250361,-4.09  
93058477\H,-4.2314017325,-2.3822593336,-2.8714699718\C,-4.7084173248,2  
.3759455391,1.7369777774\C,-4.3014022762,2.0953622656,3.1722967547\H,-  
5.4547008053,1.6662460758,1.3782395265\H,-5.1133005024,3.389612621,1.6  
271870679\H,-3.9146389448,1.0772762733,3.261973759\H,-5.1656923226,2.1  
975789254,3.8375412867\H,-3.5266863198,2.7948347282,3.5003144878\

## Int2-B

1\GINC-OMC-1-816\Freq\RB3LYP\GenECP\C59H62N1O6P1Pd1\SHIMGRP\05-Oct-2  
023\0\#P Geom=AllCheck Guess=TCheck SCRF=Check GenChk RB3LYP/GenECP F  
req\product\0,1\C,0.8246695766,3.33445529,-1.5152689193\C,1.10576751  
03,2.1329051514,-2.3337084788\C,2.1917428316,1.369236717,-2.036453082\  
C,1.7871292164,3.7047066547,-0.4549396131\C,2.7787875064,2.8253182493,  
-0.1414681312\C,3.0341809285,1.6282360959,-0.9016227166\H,2.4418229754  
,0.5193109524,-2.6534637868\H,3.4516702309,3.0134899759,0.686863491\C,  
0.1629158402,1.7747364716,-3.4897706071\C,1.6593095331,5.0722807291,0.  
2333726676\O,-0.2067314613,4.0183546219,-1.7143034955\C,0.6487471056,0  
.5358514248,-4.2619318924\C,-1.2369429321,1.4572418485,-2.9162614415\H  
,1.6321486828,0.6962905902,-4.7153181611\H,-0.0571827226,0.3098484853,  
-5.0676243559\H,0.7141018756,-0.3461859793,-3.6171027479\C,0.332874045  
5,5.2016462329,1.0101761157\H,-0.5190896029,5.0688058148,0.347047167\H  
,0.2689913097,6.1938665624,1.4728461384\H,0.2775403681,4.457045065,1.8  
098955582\C,1.7240924555,6.1761646744,-0.8483824363\H,0.9028026311,6.0  
724568517,-1.5579267296\H,2.6706653127,6.1226345392,-1.396783653\H,1.6  
611433912,7.1642179883,-0.378007121\C,2.809467699,5.3171171412,1.22460  
13568\H,2.7988175256,4.5974231029,2.0485372918\H,2.7058093587,6.316651  
0059,1.658851153\H,3.7881413294,5.2637371995,0.7374164797\C,4.10305236  
97,0.839662663,-0.5410459118\C,0.4288655214,-0.0355885428,1.1988661065

\C,2.8136957361,-0.7171717345,1.7441281429\C,1.3571483795,-1.103177660  
1,1.6250637491\C,4.6925657083,-0.2648440194,-1.292570771\H,4.658718714  
8,1.1361919116,0.3469353867\C,6.0964431344,-0.2884950877,-1.4028580617  
\C,3.9562458394,-1.291508993,-1.9063353558\C,4.6030470524,-2.267234619  
2,-2.6604040536\C,6.7381136851,-1.25712791,-2.1666397932\C,5.990124678  
7,-2.2473623467,-2.8085125535\H,6.4876519118,-3.011078678,-3.398976516  
1\H,4.0233094848,-3.0603806942,-3.1208747311\H,6.6749421859,0.47388782  
96,-0.8903056129\H,7.8205627669,-1.2480941386,-2.252833411\H,2.8913059  
194,-1.3601688767,-1.7323719857\C,3.7089826329,-1.7314088935,1.2795886  
534\C,3.215056011,0.4301877205,2.4948614914\C,0.0268929056,1.159877159  
7,1.1665048492\C,-0.978743798,2.0827174893,0.993097096\H,-1.4999173589  
,2.4589436347,1.868898032\H,-0.993424729,2.7346055,0.1274456891\O,3.35  
26275139,-2.7791875569,0.7146294061\O,5.0367009059,-1.4897397149,1.519  
2938345\C,5.9338257767,-2.5330535519,1.1257282323\C,5.991822768,-3.641  
7051395,2.16827797\H,6.9037940149,-2.0392052414,1.0205470099\H,5.63189  
70231,-2.9319333957,0.1549696868\H,6.250778697,-3.2340514903,3.1503060  
488\H,6.7454170007,-4.3888239426,1.8927687558\H,5.0192904562,-4.134565  
0786,2.2351741144\O,4.3133039915,0.9841748077,2.5676689877\O,2.1353877  
082,0.9675462223,3.1994651604\C,2.4179982213,2.1512555235,3.9410955934  
\C,1.0930616652,2.726901944,4.4099772713\H,3.0713015777,1.9115028077,4  
.789365987\H,2.9682641164,2.859818149,3.3143958075\H,0.5511741005,2.00  
30695431,5.0272681079\H,0.4630386646,2.985186848,3.5541940527\H,1.2578  
041296,3.632503979,5.0031416744\H,-1.1831582878,0.6339198309,-2.192999  
1503\H,-1.9223677021,1.1649218719,-3.7217987389\H,-1.6377679669,2.3308  
143087,-2.405886848\C,0.0632436049,2.9466351614,-4.4912396457\H,1.0457  
783803,3.1628708003,-4.9242189875\H,-0.3053517136,3.8453359185,-3.9978  
55226\H,-0.6166850761,2.685155101,-5.3105962614\C,-1.991130419,-2.7589  
94245,2.8227916868\C,-2.3185253126,-3.4846257901,3.9676912187\C,-2.402  
4853189,-3.2127614359,1.5604008977\C,-3.1547146684,-4.3911919126,1.458  
5945017\C,-3.487385237,-5.1078788504,2.6072196815\C,-3.0679216355,-4.6  
573236883,3.8609586644\H,-1.4135934508,-1.8429293869,2.8994320893\H,-1  
.9906548549,-3.1316175043,4.9403695578\H,-4.072365298,-6.0186711643,2.  
5235638571\H,-3.3267809653,-5.2191565972,4.7531605943\H,-3.4802521753,  
-4.7463585919,0.486473115\H,-1.8831963276,-2.249191498,0.0985543638\C,  
-0.4544050198,-3.1289099769,-0.6014160871\C,-3.2003345615,-2.559308172  
8,-1.150027022\C,0.152650255,-4.2104126579,0.0445747884\C,0.0711618797  
,-2.6521826522,-1.8127699\C,1.1750105945,-3.2766308332,-2.3831324626\C  
,1.2830109374,-4.8059094588,-0.514847876\C,1.7880511013,-4.3481499073,  
-1.7282308623\H,-0.2389580084,-4.5703373062,0.989366945\H,-0.386898335  
5,-1.7993804767,-2.304589256\H,1.5719623931,-2.9090765823,-3.324384523  
3\H,2.6744697144,-4.8083839171,-2.150736591\H,1.7791493537,-5.61474906  
58,0.0098697006\C,-3.0887772966,-3.6638943743,-2.0041851586\C,-4.34027  
76485,-1.7314325854,-1.2640232136\C,-5.3266310659,-2.0360530084,-2.216  
9880027\C,-5.1900223871,-3.1315526474,-3.0631360008\C,-4.068241874,-3.

9502797484,-2.9543307847\H,-6.1984181441,-1.3979478992,-2.2889715461\H  
,-5.9569042405,-3.3419446422,-3.8012792132\H,-3.9506691591,-4.81086129  
23,-3.605333683\H,-2.2165598913,-4.3021909177,-1.9269942918\C,-4.59062  
50908,-0.5457376412,-0.4229076175\O,-5.8988077608,-0.2371201427,-0.282  
9058505\C,-5.9703712743,1.0249763126,0.4245093976\N,-3.7513656121,0.23  
66159753,0.1703930485\C,-4.5243574414,1.2662706413,0.9170959952\H,-6.7  
018251235,0.9236730688,1.2266369105\H,-6.2954401527,1.7925051642,-0.28  
27600352\Pd,-1.6564344873,-0.0134240548,0.5149813915\H,-4.4265514165,1  
.0311540488,1.9828333983\C,-4.0584561421,2.679492325,0.6772538871\C,-4  
.0364657672,3.5930545712,1.7340347207\C,-3.6748868178,3.0949613276,-0.  
6015920931\C,-3.6268852846,4.909237272,1.51625648\H,-4.3262735433,3.27  
09690123,2.7313252874\C,-3.2444850388,4.4023567619,-0.8167283901\H,-3.  
6609982134,2.3786209874,-1.4161787237\C,-3.2252791346,5.3123694339,0.2  
425235231\H,-3.6034083693,5.6117100198,2.3434923593\H,-2.8822708517,4.  
6972423089,-1.7944339251\H,-2.8770667416,6.3266224815,0.0778068434\H,0  
.9475221403,-1.4872394955,2.5760081359\H,1.3170443464,-1.9355904668,0.  
9202477372\

## TS2-B

1\1\GINC-OMC-1-804\Freq\RB3LYP\GenECP\C59H62N1O6P1Pd1\SHIMGRP\24-Oct-2  
023\0\#p freq genecp b3lyp empiricaldispersion=gd3bj geom=check guess  
=read\TS2\0,1\C,0.252103256,3.3501560403,-1.5263437355\C,0.632267383  
2,2.1881211583,-2.3371083047\C,1.7798993587,1.5012353489,-2.0346199179  
\C,1.2213437785,3.8355014799,-0.53448821\C,2.3140808276,3.0600413561,-  
0.2453688459\C,2.624580671,1.8556388502,-0.9454757228\H,2.0678099679,0  
.6585547818,-2.6437679078\H,3.0053708506,3.3570239329,0.5356019265\C,-  
0.2780412245,1.750131386,-3.4932168874\C,1.00537688,5.2080004642,0.123  
470896\O,-0.8713736338,3.9153442914,-1.6714622799\C,0.328868653,0.5917  
169411,-4.3032029677\C,-1.6314115896,1.275283991,-2.9194788633\H,1.290  
7205578,0.8667603451,-4.7480189114\H,-0.3516401678,0.3200028917,-5.117  
3475753\H,0.4859361017,-0.2988560383,-3.6872669394\C,-0.2809505088,5.2  
400932318,0.9754655588\H,-1.1495786162,5.0062380102,0.3632423217\H,-0.  
4132040447,6.2362621776,1.4156234944\H,-0.2210005632,4.5185402044,1.79  
71044557\C,0.8967922022,6.2759144443,-0.9897705416\H,0.0572021027,6.05  
34698649,-1.6491055925\H,1.8148835981,6.302683684,-1.5864117378\H,0.74  
92176388,7.268966178,-0.5485831639\C,2.1801727345,5.5966105457,1.03710  
54\H,2.2845203027,4.9097566165,1.8836493605\H,2.0071817976,6.597754698  
9,1.4455230154\H,3.1311898365,5.615034064,0.4956544465\C,3.7496194878,  
1.1186571423,-0.5236967695\C,0.5149672457,0.2034488293,0.8863625289\C,  
3.028247154,-0.2000116351,1.3260287969\C,1.6484467047,-0.7305265698,0.  
9692126828\C,4.4930765797,0.1288596792,-1.3131691505\H,4.3660269877,1.  
605338536,0.2256714129\C,5.8981024224,0.22119608,-1.2857602204\C,3.916  
2272579,-0.8985798811,-2.0790041944\C,4.7132040851,-1.7510553947,-2.83  
81866479\C,6.6938912897,-0.6345251162,-2.0407187436\C,6.102059019,-1.6

207198384,-2.8323315593\H,6.7176179242,-2.2893065881,-3.4270071759\H,4  
.2460990765,-2.5295506358,-3.4321455403\H,6.3576081303,0.981144695,-0.  
6620895342\H,7.7748277857,-0.5336289504,-2.0096438422\H,2.8476825697,-  
1.059522259,-2.0526568535\C,4.0268673675,-1.2426224912,1.1822587621\C,  
3.2210500222,0.8684739285,2.2959407618\C,-0.0938903775,1.2965925815,1.  
031349637\C,-1.2531591525,2.0338578577,1.0229955546\H,-1.7420515607,2.  
2623569822,1.9656686619\H,-1.4589661199,2.7130485276,0.2012945158\O,3.  
7838443726,-2.3544424794,0.705385401\O,5.2787889893,-0.8940099233,1.58  
29782727\C,6.2902851998,-1.8960136912,1.3974849452\C,6.2840612704,-2.9  
10250879,2.5320869767\H,7.2280731188,-1.3348173596,1.3719238686\H,6.14  
03174392,-2.3848934976,0.4322447437\H,6.3882173365,-2.4076019397,3.498  
3895207\H,7.1150559002,-3.6152841041,2.417009882\H,5.3472939935,-3.471  
8631607,2.5238928772\O,4.2466176278,1.5024161127,2.5070437934\O,2.0632  
186893,1.1693419508,2.9753645542\C,2.1444872755,2.3051752768,3.8466516  
549\C,0.7453187309,2.594265826,4.3578237245\H,2.8385692452,2.085346463  
9,4.6652908115\H,2.5580982173,3.1553276939,3.2957972335\H,0.3326377549  
,1.723625227,4.8775635232\H,0.0781033858,2.8515125773,3.5313610911\H,0  
.7669026025,3.435899881,5.0575017879\H,-1.483943561,0.4367834359,-2.22  
61234086\H,-2.3011206466,0.9450655894,-3.724557506\H,-2.0993066233,2.0  
914077068,-2.3721432947\C,-0.5139735057,2.9279520591,-4.4644477205\H,0  
.4344681133,3.2514878707,-4.9066547152\H,-0.9588302671,3.7715774484,-3  
.9374428243\H,-1.1805467937,2.6210698968,-5.2797166911\C,-1.2221296499  
,-2.7256633386,2.8011064445\C,-1.2698724643,-3.4334078061,4.0020229577  
\C,-1.6615470356,-3.3269656987,1.6119206795\C,-2.1595072124,-4.6369301  
976,1.6408474451\C,-2.2134796635,-5.3367274572,2.8451801193\C,-1.76629  
72879,-4.7374968893,4.0250742741\H,-0.8456675931,-1.7074628388,2.77858  
21491\H,-0.9216156212,-2.9642398931,4.9167987145\H,-2.6026408373,-6.35  
01085481,2.8626758103\H,-1.8069508766,-5.2864998594,4.9608116731\H,-2.  
5053027463,-5.1076673595,0.7265255686\O,-1.5033079303,-2.3756769437,0.  
0587388942\C,-0.0521928698,-3.0731964553,-0.7899444453\C,-2.9036317053  
,-2.9547086376,-0.9844050201\C,0.8431777724,-3.9292384449,-0.141719284  
2\C,0.1938046459,-2.677857654,-2.1154135896\C,1.3026575734,-3.17420565  
24,-2.7932747017\C,1.9715111004,-4.3956681008,-0.816298125\C,2.1913050  
739,-4.0364840212,-2.142761794\H,0.6758003287,-4.2148563554,0.89020340  
48\H,-0.4851700893,-1.992944323,-2.6135369058\H,1.4842699006,-2.871091  
3358,-3.8198905683\H,3.0680950822,-4.4067220668,-2.6624281508\H,2.6863  
683352,-5.021415324,-0.2948685559\C,-2.7313346961,-4.080662787,-1.8001  
740616\C,-4.164146497,-2.314549388,-0.9754764145\C,-5.2009837053,-2.81  
82136875,-1.7797469058\C,-5.0035477258,-3.928942018,-2.5929544396\C,-3  
.7650395783,-4.5660457335,-2.5996207528\H,-6.1631388185,-2.3225679945,  
-1.7617513785\H,-5.8146479953,-4.2926907929,-3.2150423794\H,-3.5979001  
407,-5.4377283103,-3.2244586912\H,-1.7684591206,-4.5768832402,-1.81586  
40961\C,-4.4979094483,-1.1383387912,-0.148738406\O,-5.8185321511,-1.01  
49696614,0.1120818214\C,-6.0100046138,0.2600482486,0.7709677426\N,-3.7

317058446,-0.2185419709,0.3381647558\C,-4.579040964,0.7179394421,1.129  
3318671\H,-6.656838218,0.1032230921,1.6344058173\H,-6.4903323653,0.939  
9492559,0.0621839197\Pd,-1.6007929085,-0.1285531597,0.4542694935\H,-4.  
358532384,0.531083664,2.1864789277\C,-4.3447643658,2.1749859732,0.8251  
981241\C,-4.3901160408,3.1142325265,1.8587499342\C,-4.1025769613,2.600  
7860631,-0.4841664808\C,-4.180326654,4.4666645813,1.5873927873\H,-4.57  
15948805,2.7852681322,2.8792889171\C,-3.8663544027,3.9473018815,-0.753  
0605103\H,-4.0336085366,1.8696085751,-1.2823647148\C,-3.9096545269,4.8  
820422032,0.2832168331\H,-4.2053991465,5.1902866983,2.3962068854\H,-3.  
59791931,4.2577041949,-1.7555254471\H,-3.7082618277,5.9278187877,0.076  
3431023\H,1.3597248298,-1.5293737881,1.6693585119\H,1.7435708529,-1.24  
53031975,0.0096218886\

## Int2'-B

1\GINC-A02R03N01\Freq\RB3LYP\GenECP\C59H62N1O6P1Pd1\ACJSGGHI7X\09-Ja  
n-2024\0\#P Geom=AllCheck Guess=TChef SCRF=Check GenChk RB3LYP/GenEC  
P Freq\Bu\0,1\C,4.3012894715,2.8254495573,-0.2941397126\C,3.7290236  
252,2.8385201495,1.0794228362\C,3.6448366821,1.669301882,1.7581247218\  
C,4.0867388898,0.4019130406,1.215728747\C,4.5723009339,0.3894394194,-0  
.1470646717\C,4.6897136893,1.5147147039,-0.8930848664\H,3.2201641554,1  
.6408571383,2.7531963495\H,4.7871681343,-0.5762748408,-0.5790544529\C,  
5.1756626556,1.4779850939,-2.3460785031\C,3.2684441382,4.1708713281,1.  
6842048967\C,6.4334588392,2.3632308365,-2.5060973891\H,6.2136747781,3.  
4019292017,-2.2648589945\H,6.794822024,2.3062797544,-3.5391905325\H,7.  
2368136864,2.0117201637,-1.8488616864\C,4.0509778534,1.9795894721,-3.2  
810603809\H,3.7666449916,3.0026057115,-3.0335597168\H,3.1692635961,1.3  
367940546,-3.1962254983\H,4.3944940911,1.9561922936,-4.321701549\C,5.5  
545329213,0.050854639,-2.7784268691\H,6.3728345602,-0.3540387392,-2.17  
30456943\H,5.8898935752,0.0673752061,-3.820152662\H,4.7079881983,-0.63  
69993601,-2.7122173962\C,2.1927131718,4.8349994169,0.7927333138\H,2.55  
69355561,4.9829911827,-0.2229577263\H,1.9216773336,5.8095670324,1.2150  
117824\H,1.2862337031,4.2226944824,0.7591098499\C,4.483503264,5.117285  
6176,1.817387689\H,4.9204220679,5.3284374125,0.8412819282\H,5.25168221  
43,4.6689878507,2.4570934901\H,4.1711805521,6.0625041466,2.2760360893\  
C,2.6513938586,3.9694127238,3.0793285119\H,1.795179973,3.2889541158,3.  
0425503749\H,2.3059796212,4.9350058107,3.4626861579\H,3.3805544539,3.5  
748691587,3.7954870343\O,4.4263128856,3.8767050548,-0.9395192346\C,3.9  
710917547,-0.7227538866,1.9857839244\C,4.4054900999,-2.081149598,1.683  
22987\H,3.4510703815,-0.6032694952,2.9348885706\C,5.5953973188,-2.3720  
327251,0.9915237498\C,5.9484632747,-3.6893476302,0.7076218286\C,5.1287  
161891,-4.7421949611,1.1167397668\C,3.6101755169,-3.1555493258,2.12229  
30652\C,3.9595127357,-4.4691089696,1.8333034744\H,6.256716952,-1.56256  
23919,0.7038339098\H,2.6903541855,-2.9386745651,2.6517411407\H,3.32062  
87044,-5.2831272997,2.1636127384\H,6.8721879574,-3.894360409,0.1747403

221\H,5.4054143419,-5.7682357237,0.8934631745\C,-4.6809518238,-0.68558  
85635,-2.017319122\C,-5.7383450933,-1.4519441287,-2.5077929763\C,-4.80  
99540386,-0.0043721625,-0.7981631719\C,-6.0041052293,-0.1050250356,-0.  
0719671279\C,-7.0570179254,-0.8775586824,-0.5617257767\C,-6.9252711936  
, -1.5504377384,-1.7786227174\H,-3.7457532392,-0.6169500408,-2.56637083  
69\H,-5.6329942698,-1.9758851042,-3.4529311308\H,-7.9788278881,-0.9561  
518559,0.0066040232\H,-7.7457646778,-2.1531306198,-2.1560877464\H,-6.1  
048437288,0.4137900384,0.8762686817\P,-3.365990165,0.9465366344,-0.202  
3656487\C,-3.7248828339,2.6968007587,-0.5396247569\C,-3.4864771995,0.7  
913754256,1.6380417749\C,-4.8688911801,3.1039934384,-1.2348681699\C,-2  
.7707821009,3.6520064616,-0.1488584757\C,-2.9736943012,4.9980340695,-0  
.4394126262\C,-5.0607390131,4.4539749558,-1.5340353051\C,-4.1163732532  
,5.4004732214,-1.137500843\H,-5.6050674246,2.3706882379,-1.5457412993\  
H,-1.8696264839,3.3355217283,0.3646818399\H,-2.2309952954,5.7296731536  
, -0.1372922927\H,-4.265473733,6.4494497716,-1.3747688113\H,-5.94773702  
71,4.7631366828,-2.0784816148\C,-3.7920622331,1.8837868439,2.453500993  
6\C,-3.2320347941,-0.4560304013,2.2558539624\C,-3.3029101088,-0.585583  
6599,3.6460857678\C,-3.5793611781,0.5230653508,4.4441043503\C,-3.82459  
50965,1.755864552,3.8443450058\H,-3.1303220116,-1.5586012523,4.0921855  
052\H,-3.6095669949,0.4203118113,5.5237952189\H,-4.050822375,2.6242701  
94,4.4552127151\H,-4.0011537795,2.8454700779,2.0010136232\C,-2.9641413  
94,-1.6600776213,1.4517739937\O,-3.5984556194,-2.7832554892,1.86182560  
32\C,-3.1659245932,-3.8351258917,0.9568949465\N,-2.2569198009,-1.74181  
33949,0.3797074213\C,-2.5312990447,-3.069395857,-0.2262294632\H,-4.036  
6341683,-4.4329167922,0.6891749829\H,-2.4273163505,-4.4523901022,1.476  
9847451\Pd,-1.2856974326,0.0584547929,-0.5345604905\H,-3.2785997375,-2  
.8966787427,-1.0117238477\C,-1.3623652724,-3.8147691326,-0.8111194112\  
C,-1.590006153,-4.6728373592,-1.8952284216\C,-0.096190511,-3.762275433  
4,-0.2248727333\C,-0.5651170697,-5.4847992388,-2.3772691804\H,-2.57346  
37414,-4.7050438898,-2.3585701727\C,0.9339793788,-4.5653676583,-0.7184  
827548\H,0.1061630494,-3.0639831067,0.5781562876\C,0.6986730617,-5.434  
4005108,-1.7836498282\H,-0.7487258623,-6.1454644129,-3.2193349546\H,1.  
9217693879,-4.4766264944,-0.2820220089\H,1.5023219574,-6.0574064075,-2  
.1650950357\C,0.8936470372,0.1052341752,-0.086208618\C,0.9528337457,1.  
5324412721,-0.6737621932\C,-0.3756654134,1.6381916519,-1.3479447104\H,  
1.8002395854,1.6857277319,-1.3436211335\H,1.0305236987,2.2361270008,0.  
1559305439\C,-0.8706654345,2.3461009974,-2.3107501782\C,-1.4307889939,  
3.0665050341,-3.2602980315\H,-1.9596701327,3.989893598,-3.0316127495\H  
, -1.3741652753,2.7762512073,-4.307393738\C,1.6251138745,-0.9303095246,  
-0.8212632343\C,0.7531330772,0.04837176,1.3777867554\O,0.6736449768,-1  
.2194011534,1.8930817167\O,1.68692392,-0.6144064334,-2.1570191931\O,2.  
1481974646,-1.9383398434,-0.375036683\O,0.6283210859,1.0237731206,2.11  
26602667\C,0.3706069295,-1.2984974107,3.2929548355\C,-0.1284204586,-2.  
7031299307,3.5817274086\H,-0.3764805821,-0.5431621231,3.5476248746\H,1



.2739099232,-1.0710679594,3.8723526362\H,-1.0637041554,-2.901712397,3.051749375\H,-0.3099800399,-2.8225474491,4.6547506723\H,0.5987614415,-3.4584276866,3.2706648192\C,2.1173306442,-1.6480779477,-3.0551700646\C,0.9027687739,-2.2959118241,-3.7012391078\H,2.7141595084,-2.3769485961,-2.5025952728\H,2.7469209256,-1.1525239071,-3.7989677802\H,0.2744408619,-2.7663064754,-2.9427525104\H,1.2144915185,-3.0672420763,-4.4137355789\H,0.3084455411,-1.5469049625,-4.2334035872\

## TS2'-B

1\1\GINC-A02R04N03\Freq\RB3LYP\GenECP\C59H62N1O6P1Pd1\ACJSGGHI7X\12-Jan-2024\0\#p freq genecp b3lyp empiricdispersion=gd3bj geom=check guess=read\TS2'\0,1\C,4.6680006155,1.6998646857,0.2972500814\C,3.7892551939,1.5322886541,1.4553855195\C,3.1570495562,0.3253518247,1.6511981746\C,3.2983235165,-0.784538561,0.7782488867\C,4.1966414451,-0.6348676882,-0.306337594\C,4.8839643396,0.5318312723,-0.5583141928\H,2.5158258667,0.1953594756,2.5144559145\H,4.3813034715,-1.4892033115,-0.9379221859\C,5.9026643127,0.6236886843,-1.7049641817\C,3.6157249951,2.6995907355,2.4394142918\C,7.2916346113,0.974299732,-1.1243572722\H,7.2435107876,1.9186605361,-0.5818353511\H,8.0307670951,1.0612426108,-1.9302716347\H,7.6278321634,0.1890298838,-0.438323831\C,5.4850193681,1.7129885767,-2.7191233879\H,5.4313947244,2.6825558422,-2.2236677764\H,4.507968022,1.4778963125,-3.1559759082\H,6.2159897052,1.7686542737,-3.535121683\C,6.0327667491,-0.7016631413,-2.4759153497\H,6.3591973349,-1.5229931728,-1.8291852088\H,6.7783153909,-0.5881363077,-3.2699485889\H,5.0883337541,-0.9931355822,-2.9497859533\C,3.0697509426,3.9478098123,1.7094625282\H,3.7477603478,4.2412198077,0.9091495906\H,2.9603941094,4.7806377778,2.4164910892\H,2.0866906164,3.7364993234,1.2784303592\C,4.984623182,3.0411707767,3.0677207225\H,5.6980520928,3.299612866,2.284262976\H,5.3721690803,2.1842456268,3.6295331484\H,4.890561296,3.8881161501,3.7590352802\C,2.6279016283,3.3616847908,3.5702848638\H,1.6359201518,2.1197028796,3.1746357343\H,2.5258315747,3.2264484994,4.2355388262\H,2.9721563125,1.5182546971,4.1787661343\O,5.2174311127,2.8141918779,0.0416471638\C,2.5141597032,-1.976894636,1.0438024937\C,2.9317922074,-3.327071098,0.5531876174\H,2.217248646,-2.0503926419,2.0888057685\C,3.2278871257,-3.6391934009,-0.7851028925\C,3.6067609274,-4.9279338281,-1.1557453639\C,3.6864323731,-5.9447537425,-0.2029438664\C,2.9987149525,-4.367967938,1.4938461695\C,3.3762765858,-5.6583939404,1.1267350108\H,3.1477254138,-2.8811787807,-1.5519671667\H,2.741461976,-4.1571651165,2.5268154178\H,3.4239138067,-6.4391210408,1.8800980821\H,3.8372950205,-5.1367846331,-2.1963415087\H,3.9821179483,-6.9480003383,-0.4949132254\C,-3.6901470241,1.8899339148,-2.6697572365\C,-4.7698005354,2.4422274097,-3.3582506184\C,-3.0236341351,2.6412237252,-1.6908986968\C,-3.4483949066,3.9458994925,-1.4070630503\C,-4.5336804778,4.4905184837,-2.0929348501\C,-5.1944504663,3.7404363168,-3.0679608036\H,-3.3578976644,0.8780624963,-2.884673

791\H,-5.2803621767,1.8577112627,-4.1174634937\H,-4.8615851386,5.50053  
93392,-1.8671942364\H,-6.0387193765,4.1674695849,-3.6005451996\H,-2.93  
32204848,4.5321655377,-0.6531357955\O,-1.5936226568,1.8978385688,-0.82  
5166987\C,-0.1211183766,2.5476444293,-1.6643700124\C,-1.6627466261,2.6  
506230426,0.8527868502\C,-0.2664855546,3.1655378003,-2.9175712631\C,1.  
1593179152,2.4061225686,-1.0981794044\C,2.2712348203,2.9180822593,-1.7  
647763844\C,0.8569926653,3.6430890213,-3.5902071324\C,2.1215989719,3.5  
277726459,-3.0119119466\H,-1.2475898863,3.277693384,-3.3638945058\H,1.  
2873568397,1.9079233965,-0.1450850461\H,3.2485545112,2.8563787032,-1.3  
026788054\H,2.9963996155,3.9104596993,-3.5282105525\H,0.7381682492,4.1  
164155957,-4.5602530419\C,-0.7497247635,3.6535117494,1.1840475284\C,-2  
.6053047109,2.2451541841,1.8343191305\C,-2.5855424246,2.8428941323,3.1  
034024529\C,-1.6421322107,3.8156592842,3.4223801345\C,-0.7242380708,4.  
2226678646,2.4584372454\H,-3.3105708952,2.5208712974,3.8406417517\H,-1  
.6262483797,4.2483677323,4.4170431547\H,0.026156603,4.9712363924,2.689  
1497808\H,-0.0265411624,3.9792778105,0.4485777023\C,-3.6130486646,1.20  
26955748,1.6080579677\O,-4.6335836935,1.1336598397,2.4953676139\C,-5.3  
511416123,-0.1009215829,2.2060231123\N,-3.6407068103,0.3236029112,0.66  
55695534\C,-4.8749967353,-0.4752426417,0.7861552385\H,-6.4180056308,0.  
1046488821,2.2834711486\H,-5.0542271581,-0.8471108289,2.9492989977\Pd,  
-2.0547106891,-0.2846645677,-0.6169107085\H,-5.5816662388,-0.109002521  
8,0.0308348996\C,-4.6071196484,-1.9394617734,0.5409733433\C,-5.4863613  
684,-2.6912323614,-0.2433074055\C,-3.4669897811,-2.5547548007,1.081388  
6656\C,-5.2416446606,-4.045012382,-0.4765219091\H,-6.3615963144,-2.213  
8552644,-0.6764726867\C,-3.2243530722,-3.9099709454,0.8505436049\H,-2.  
7656462966,-1.9922054592,1.6905963727\C,-4.1114044011,-4.6541727635,0.  
0711515245\H,-5.9302918597,-4.6197858221,-1.0882355805\H,-2.3299044767  
,-4.3554613664,1.2700355465\H,-3.9198292796,-5.7071445226,-0.112151218  
8\C,0.6706148164,-1.7199605889,0.3885604683\C,0.8069216576,-1.14309085  
12,-1.0188095602\C,-0.5129339997,-0.9108436863,-1.7049555971\H,1.40269  
73578,-1.8173343724,-1.6342690214\H,1.3519496999,-0.200272896,-0.94636  
32836\C,-0.8953522827,-1.2054292253,-2.9097062175\C,-1.334970335,-1.49  
32615571,-4.1200130254\H,-1.1444980758,-0.8357875797,-4.9657842469\H,-  
1.8842061294,-2.4105162531,-4.3217385956\C,0.1295306934,-3.1014200816,  
0.484305524\C,0.2032426645,-0.7216467551,1.3757588141\O,-0.1731546877,  
-1.2291614003,2.5730651962\O,0.0961983084,-3.688631208,-0.7383526019\O  
,-0.1701849656,-3.7040693144,1.5032018846\O,0.2591534682,0.4901350903,  
1.1803038244\C,-0.4557997229,-0.2946490266,3.6355996516\C,-1.789996503  
8,-0.6539345897,4.2638000538\H,-0.4542043358,0.719360716,3.2368115538\  
H,0.3589689449,-0.3866282143,4.3607637364\H,-2.6075135592,-0.497240012  
4,3.5548677573\H,-1.9745084559,-0.0203809431,5.1374312102\H,-1.8049209  
31,-1.6999492186,4.5811919565\C,-0.0974251797,-5.1140860455,-0.7636415  
097\C,0.079003494,-5.5550263518,-2.2029786322\H,-1.0982983879,-5.34955  
22243,-0.3907310605\H,0.6347311465,-5.5793096072,-0.0981455057\H,-0.64

38816454,-5.0536367542,-2.8534509696\H,-0.0687415378,-6.6365166303,-2.  
2852201244\H,1.0858986359,-5.3150402342,-2.5520923588\

### Int3-B

1\1\GINC-A01R08N03\Freq\RB3LYP\GenECP\C59H62N1O6P1Pd1\ACJSGGHI7X\01-Oct-2023\0\#P Geom=AllCheck Guess=TCheck SCRF=Check GenChk RB3LYP/GenEC  
P Freq\product\0,1\C,1.7409039538,-3.2106123384,0.6465419803\C,1.560  
3429746,-2.2748107101,1.7426043938\C,2.2421937041,-1.065239047,1.72876  
35173\C,2.8441977037,-2.9504645222,-0.2618160868\C,3.4718834479,-1.711  
3053893,-0.2295645142\C,3.1400581827,-0.7232818588,0.7064756339\H,2.07  
60528095,-0.3457365893,2.5230766451\H,4.229341824,-1.4696634146,-0.965  
0629018\C,0.5784185935,-2.6240426193,2.8703736173\C,3.3108510344,-4.05  
26070547,-1.2273538649\O,0.9578204564,-4.2186772156,0.4812253867\C,0.6  
511358387,-1.6288041446,4.040365475\C,-0.8610056759,-2.6239545488,2.30  
92116731\H,1.655976205,-1.5932000179,4.4734728409\H,-0.0481233472,-1.9  
322242535,4.8278498018\H,0.3890612703,-0.6128139984,3.7341262808\C,2.2  
218831509,-4.3982256865,-2.2647259435\H,1.3142588489,-4.7124082278,-1.  
753296937\H,2.5639123659,-5.2085419153,-2.922023087\H,1.9956753981,-3.  
5301531883,-2.8947664501\C,3.6319644202,-5.3227713884,-0.4066205339\H,  
2.7466407518,-5.6388823647,0.1469126758\H,4.4403979344,-5.1234747804,0  
.3051531701\H,3.9532205095,-6.137147277,-1.0684923974\C,4.5804075741,-  
3.6498070274,-1.9973185975\H,4.4085477927,-2.7855535858,-2.6480806922\  
H,4.9027552021,-4.4835719944,-2.6311099802\H,5.4051779584,-3.404862606  
3,-1.3200319021\C,3.6925852316,0.6801629894,0.5566103455\C,0.593262435  
1,0.2084895333,-0.5971955\C,2.7352825875,1.5810835649,-0.321491362\C,1  
.2299699677,1.3940545627,-0.0041641257\C,4.0813422479,1.2763323581,1.9  
011980456\H,4.6103921033,0.6174292827,-0.0315224418\C,5.3240764328,0.8  
992038736,2.4318779163\C,3.267420041,2.1153367596,2.6709649927\C,3.686  
6855451,2.5672447733,3.9257100997\C,5.7446087958,1.3458270842,3.680584  
9751\C,4.92395541,2.1869038014,4.4378506879\H,5.247744828,2.5374158127  
,5.4134588557\H,3.0357474303,3.2191761307,4.5016626836\H,5.9574020321,  
0.2328830622,1.8528712632\H,6.7128508061,1.038327486,4.0652724272\H,2.  
3038540082,2.4409580466,2.3047781845\C,3.0745352645,3.0700111326,-0.14  
69053733\C,2.9880142472,1.2894689418,-1.8119987854\C,0.5972107483,-0.8  
750175204,-1.2498550262\C,-0.0340480451,-2.0051718266,-1.6915868818\H,  
-0.302745849,-2.1125193038,-2.7383179741\H,0.0519334649,-2.9188867773,  
-1.1034264084\O,2.2942507795,3.9427592248,0.1776949698\O,4.3765828198,  
3.2791961931,-0.4017993685\C,4.8693827403,4.6214357633,-0.1858887266\C  
,4.5915045479,5.5057561637,-1.3901381514\H,5.9397174656,4.4896080481,-  
0.0169750884\H,4.4051094409,5.0191340178,0.7194591461\H,5.0183299638,5  
.0666828948,-2.2965048068\H,5.0406430158,6.4930262431,-1.2404012175\H,  
3.5154187746,5.6317654921,-1.5286667486\O,3.907009275,0.6627428308,-2.  
2816757881\O,2.025563314,1.8715199515,-2.5655876189\C,2.0848646135,1.5  
936383572,-3.9797524445\C,0.8193273612,2.1530274863,-4.598782556\H,2.9

869930096,2.0545514952,-4.3941979341\H,2.1690264762,0.512250417,-4.119  
7588226\H,0.7394413714,3.228234454,-4.4114523962\H,-0.0637199182,1.659  
2601827,-4.1824188914\H,0.8272122266,1.9909637864,-5.6808749297\H,-1.1  
183290369,-1.6360610133,1.9032476361\H,-1.5932536991,-2.8800118489,3.0  
875671669\H,-0.9169009055,-3.3505511722,1.4991416018\C,0.8999945346,-4  
.024665216,3.4378711276\H,1.900669508,-4.0305172378,3.8834846432\H,0.8  
679398623,-4.764397534,2.638081431\H,0.1783662129,-4.2979414036,4.2185  
576262\C,-2.0211903607,2.7602765844,-1.9272238068\C,-2.3343083406,3.71  
05976955,-2.8968788156\C,-2.8959834066,2.539240123,-0.8505948354\C,-4.  
0877829225,3.2697700727,-0.7646009226\C,-4.4023649531,4.2099152243,-1.  
7466013033\C,-3.5265637121,4.4330708155,-2.8102280644\H,-1.1007377718,  
2.1890713717,-1.9999175588\H,-1.650827428,3.8790892052,-3.7227797577\H  
, -5.330307315,4.7694500343,-1.6784610292\H,-3.7734299708,5.1668785729,  
-3.5713517395\H,-4.7676619639,3.1051031259,0.0646812967\P,-2.390856365  
7,1.3163696086,0.4096412066\C,-1.4459071114,2.2683279632,1.6432381599\  
C,-3.931075551,0.8860631966,1.3094840237\C,-1.1224872069,3.6170066389,  
1.4636709927\C,-0.9677269946,1.5797214635,2.7696582876\C,-0.1910916443  
,2.2423700324,3.7148502112\C,-0.3291836899,4.2728739672,2.4068113081\C  
,0.127191532,3.5922430693,3.5338217655\H,-1.4701923787,4.1500762036,0.  
5861965275\H,-1.1912654289,0.5253947645,2.8946771041\H,0.1884066315,1.  
699628475,4.5742957151\H,0.746171989,4.1051825309,4.2628485328\H,-0.05  
90565413,5.3116204079,2.2497313923\C,-4.3145394234,1.6588218847,2.4131  
999351\C,-4.7530453342,-0.1969675754,0.9211770547\C,-5.9235998328,-0.4  
682711114,1.6499050045\C,-6.2789959153,0.3030802958,2.7514762756\C,-5.  
4741333412,1.3740931891,3.1324799196\H,-6.5481079294,-1.2974693472,1.3  
434105482\H,-7.1807205711,0.0661869875,3.3064544377\H,-5.7423702174,1.  
9878337963,3.9865867888\H,-3.6898378438,2.4909453774,2.7155552872\C,-4  
.4853680014,-1.079884214,-0.2317617206\O,-5.591088502,-1.6895485054,-0  
.7158704834\C,-5.1498525983,-2.6536524784,-1.7028953626\N,-3.372278910  
9,-1.3626777744,-0.8235028322\C,-3.6719025214,-2.2845402463,-1.9550431  
561\H,-5.7897252366,-2.5594443993,-2.5804820526\H,-5.2506265114,-3.652  
8396615,-1.2705872819\Pd,-1.4298125463,-0.4965538255,-0.5804054784\H,-  
3.5633388556,-1.7012445012,-2.8769321919\C,-2.7793730542,-3.4956034255  
, -2.0264998119\C,-2.4152657996,-4.0095374243,-3.2744112946\C,-2.334874  
404,-4.1275800898,-0.8616170118\C,-1.6072339943,-5.1439859058,-3.35489  
64547\H,-2.7534470488,-3.5148420113,-4.1821468473\C,-1.4997610117,-5.2  
404988231,-0.9398012417\H,-2.5795731539,-3.7054415969,0.1070824942\C,-  
1.1442924584,-5.7542260303,-2.188518287\H,-1.3197941183,-5.5350287411,  
-4.3261125421\H,-1.0752125747,-5.6575805697,-0.035545084\H,-0.48038633  
52,-6.6099752049,-2.2502465781\H,0.7017991447,2.2928950078,-0.32376689  
38\H,1.1057080363,1.3315718482,1.0773833898\

**TS3-B**

I\1\GINC-OMC-1-818\Freq\RB3LYP\GenECP\C59H62N1O6P1Pd1\SHIMGRP\05-Oct-2

023\0\#p freq genecp b3lyp empiricdispersion=gd3bj geom=check guess  
=read\TS2\0,1\C,2.5211956471,3.3575842815,-0.5469034151\C,2.18478715  
75,2.3534540293,-1.5646260172\C,2.3897940988,1.0227755628,-1.295439272  
8\C,3.2031325277,2.8760080494,0.6619014827\C,3.4025956688,1.5242961985  
,0.8448624622\C,2.9110242691,0.5498658234,-0.0572237733\H,2.1254851573  
,0.2768912813,-2.0355169555\H,3.8967466853,1.1602824246,1.7366296576\C  
,1.5893977778,2.8100817184,-2.9028667568\C,3.7128983004,3.9003657104,1  
.6850688029\O,2.2495216334,4.5822572859,-0.7158886623\C,1.3501347616,1  
.6354358578,-3.8665398172\C,0.2338923118,3.5023545754,-2.649889747\H,2  
.2742919653,1.0904343891,-4.0868819227\H,0.9470041548,2.0142966698,-4.  
8120105595\H,0.6252926284,0.9238995907,-3.456651983\C,2.5224113891,4.6  
973761579,2.2599720172\H,1.979126352,5.1757869679,1.4465987568\H,2.874  
9204019,5.461051613,2.965462004\H,1.8394220697,4.0279434576,2.79563407  
74\C,4.693948325,4.8750351287,0.9948315146\H,4.1993749532,5.3785828105  
,0.1640315966\H,5.563935886,4.3308486107,0.6105170479\H,5.0523702285,5  
.6260868816,1.7098187005\C,4.4501571226,3.2368743374,2.8602713286\H,3.  
8026273981,2.5490471595,3.4146776312\H,4.7922367099,4.0095624266,3.557  
4826639\H,5.330645917,2.6775978667,2.5263954978\C,3.3704781014,-0.9135  
799961,0.0726337686\C,0.2824418921,-0.5516158979,0.4566450829\C,2.3367  
089285,-1.8954655559,0.7246453401\C,0.9176535241,-1.8420006879,0.11614  
44826\C,3.9568139899,-1.385847266,-1.2568593516\H,4.2010413559,-0.9074  
816158,0.7809445257\C,5.1372773027,-0.7508790816,-1.6775042497\C,3.389  
76648,-2.3411814096,-2.1081087304\C,3.9823202362,-2.6482622271,-3.3381  
652128\C,5.7289480149,-1.0545940989,-2.8979371056\C,5.149696559,-2.008  
2800806,-3.7414801553\H,5.6060280957,-2.2449286978,-4.6981037966\H,3.5  
193011187,-3.394673018,-3.9782184097\H,5.5740403027,0.0111149705,-1.03  
82627483\H,6.6402557963,-0.544432131,-3.1962344088\H,2.4880031551,-2.8  
708051962,-1.8343212987\C,2.840443362,-3.3461871461,0.6551310225\C,2.2  
626026759,-1.5758989108,2.2329756717\C,0.7310152735,0.6392139194,0.660  
2103004\C,0.1318537311,1.8723665947,0.9655379738\H,0.160722156,2.21313  
93885,1.9963360565\H,0.1193789349,2.6651998851,0.2258875157\O,2.198507  
2807,-4.2896906976,0.2407878294\O,4.0891862545,-3.4379141534,1.1419231  
182\C,4.6985277355,-4.7494681953,1.1136094476\C,4.2647641755,-5.575662  
4263,2.313122536\H,5.7711470854,-4.547393611,1.1260707966\H,4.43020509  
7,-5.2370894385,0.1736885321\H,4.4933461801,-5.0501990805,3.2448275969  
\H,4.7941277383,-6.5340050721,2.3180777654\H,3.1913667849,-5.773491137  
6,2.2698334479\O,3.0440356472,-0.893505096,2.852846201\O,1.2207462193,  
-2.2125440322,2.8169932258\C,1.0691411756,-1.9540604001,4.2306075491\C  
, -0.1374718372,-2.7311758283,4.7145344936\H,1.9871177937,-2.2566987309  
,4.7428210695\H,0.9489482417,-0.876361297,4.37513082\H,-0.0151483882,-  
3.7997811858,4.5130851524\H,-1.0508776194,-2.3843172752,4.2243826683\H  
, -0.256095825,-2.5970151106,5.7940651889\H,-0.4756942881,2.8041861425,  
-2.1875318134\H,-0.2034265473,3.8590613446,-3.5917043048\H,0.382831499  
1,4.3446472489,-1.9761378943\C,2.5545432553,3.8006685988,-3.5904937677

\H,3.5086027053,3.3095410761,-3.8117776652\H,2.7409312633,4.6519934243  
,-2.9357631476\H,2.1277444817,4.1578765388,-4.5361631842\C,-2.42697089  
64,-3.1202150294,1.704428399\C,-2.7887570799,-4.1793280202,2.534424106  
5\C,-3.2974787289,-2.6968854964,0.6862756801\C,-4.5377414915,-3.328417  
2196,0.5287665819\C,-4.9010642318,-4.3765130004,1.3755226688\C,-4.0262  
078982,-4.8067917325,2.3734512248\H,-1.4718183223,-2.6221227917,1.8400  
135254\H,-2.1068971927,-4.5085040183,3.3111409421\H,-5.8662704509,-4.8  
580695617,1.2516065457\H,-4.3086819206,-5.6263294108,3.0271359234\H,-5  
.2187783037,-3.0052662905,-0.250749676\P,-2.7073849406,-1.3582583471,-  
0.4075834181\C,-1.735159269,-2.1999411348,-1.7080151208\C,-4.202096891  
4,-0.7673670886,-1.2951142812\C,-1.5303730801,-3.5831289025,-1.7196625  
405\C,-1.0563550112,-1.3885981989,-2.6330465233\C,-0.1799828133,-1.956  
9292341,-3.5520440733\C,-0.6396882144,-4.1482699132,-2.6359448798\C,0.  
036175967,-3.3390949656,-3.5476314512\H,-2.0369185969,-4.2150931275,-0  
.9985755077\H,-1.1791823826,-0.3100246744,-2.5978968157\H,0.360772685,  
-1.3199523002,-4.2439077836\H,0.7418800414,-3.7778805903,-4.245956936\  
H,-0.4637441852,-5.2190432081,-2.6216827291\C,-4.6719399572,-1.5192031  
812,-2.3801892415\C,-4.9098761122,0.3978928837,-0.9160761786\C,-6.0753  
634672,0.7494725537,-1.6194717189\C,-6.5269437927,-0.0139606533,-2.690  
8968682\C,-5.8211294651,-1.1515325168,-3.0774206731\H,-6.615698982,1.6  
387579469,-1.3212639386\H,-7.4229348689,0.2856116347,-3.2246355984\H,-  
6.1593588031,-1.7510345176,-3.9166490981\H,-4.1209158461,-2.4032277962  
,-2.682459741\C,-4.5020154941,1.3167949101,0.1678664624\O,-5.495793023  
1,2.1120368351,0.6265621536\C,-4.9271765544,2.9906980062,1.6298929943\  
N,-3.3370309803,1.5013860304,0.6887576795\C,-3.4218836062,2.6165135955  
,1.6656053657\H,-5.4456614616,2.8011790107,2.5721168737\H,-5.097026460  
8,4.0207904045,1.3121239475\Pd,-1.542310428,0.3535741123,0.5048263543\  
H,-3.1359324994,2.2250089217,2.6458792785\C,-2.5020639543,3.7563919141  
,1.3003747701\C,-1.702896067,4.3542903957,2.2767842009\C,-2.4548291531  
,4.2333734631,-0.0138079152\C,-0.8420296354,5.3985529727,1.9402541078\  
H,-1.7329195312,3.9817794765,3.2978286319\C,-1.5955346877,5.2764975685  
,-0.3497987197\H,-3.0604905474,3.7623503596,-0.7828740902\C,-0.7745729  
585,5.8503854398,0.6225485732\H,-0.2008570332,5.8356569291,2.697515714  
2\H,-1.5407043657,5.6199302414,-1.3766487159\H,-0.0695119253,6.6265617  
584,0.3476530258\H,0.3413012966,-2.6938030667,0.4729766932\H,0.9811179  
79,-1.9457615882,-0.9680104848\

#### Int4-B

1\1\GINC-OMC-1-817\Freq\RB3LYP\GenECP\C59H62N1O6P1Pd1\SHIMGRP\30-Sep-2  
023\0\#P Geom=AllCheck Guess=TChef SCRF=Check GenChk RB3LYP/GenECP F  
req\product\0,1\C,3.2570935774,2.4612881357,4.3206515369\C,3.4276827  
402,3.5064457692,3.2767206221\C,4.6543094482,4.0178804036,3.0737604829  
\C,4.4022690238,2.1841453997,5.2409687555\C,5.6109298427,2.7014075128,  
4.9482492782\C,5.898701205,3.6049902527,3.8007549828\H,4.8165601709,4.

7537576459,2.2987873848\H,6.4789123499,2.4723122912,5.5562953056\C,2.2  
060399031,3.9821735384,2.4776103885\C,4.1582871554,1.3221862004,6.4874  
691684\O,2.1918428109,1.8372608448,4.4280458289\C,2.5740636236,5.12342  
24012,1.5133509165\C,1.6326445099,2.8311229329,1.6248181459\H,2.989504  
2535,5.9866578182,2.0433897907\H,1.6760869513,5.4525277539,0.980774540  
8\H,3.2937365266,4.7873045415,0.760473621\C,3.7759134457,-0.1179786758  
,6.0862669031\H,2.8635988804,-0.1236561588,5.4910496209\H,3.6185758506  
, -0.7272359908,6.9840449162\H,4.5807524975,-0.5726925339,5.5012316743\  
C,3.0229299658,1.9528819701,7.3256049503\H,2.0901013409,1.9835954931,6  
.7627539584\H,3.2855749201,2.9745126987,7.6228429055\H,2.8625056724,1.  
3672388561,8.2376820047\C,5.4129647503,1.2468674046,7.3744265447\H,6.2  
49574619,0.7622619112,6.8612853678\H,5.1877736935,0.6577657159,8.26900  
35134\H,5.7419218914,2.2387257253,7.7018898357\C,6.6682631055,4.886426  
4069,4.365877845\C,7.4289060955,3.606520604,1.7445780627\C,7.91804252,  
5.2541112324,3.5220541727\C,7.7109087072,5.0572805461,2.0014703757\C,5  
.6612849017,5.9929318612,4.6285496016\H,7.0625294115,4.589694469,5.337  
0363516\C,4.8850030799,5.8995620878,5.7922795552\C,5.3839316983,7.0320  
953611,3.7304861864\C,4.3509163886,7.9364326455,3.9822421413\C,3.84464  
3031,6.7922377256,6.0396591232\C,3.5688024115,7.8157180288,5.130457240  
1\H,2.7595325857,8.51443286,5.3200474264\H,4.1557004157,8.7364476017,3  
.273028979\H,5.0854218997,5.0974124913,6.4959308877\H,3.250394813,6.69  
00625585,6.9429602961\H,5.9715506641,7.1456548285,2.8297144889\C,8.377  
1877486,6.6836410323,3.8175722906\C,9.0693763191,4.3358980272,3.979043  
0276\C,6.704381293,2.9030075131,2.6726611254\C,6.3662967094,1.57882604  
85,2.1885283625\H,7.1952073853,0.8978195348,2.0240231535\H,5.460793317  
6,1.0974789892,2.5475128091\O,8.4749219602,7.5799717969,3.0080696114\O  
,8.6726377319,6.8146213855,5.1282931516\C,9.1531767017,8.1099578095,5.  
5508856153\C,10.641119965,8.2481996203,5.2713714779\H,8.9353975599,8.1  
458038441,6.6202438088\H,8.577143985,8.8820114069,5.0356083344\H,11.19  
97287588,7.4425147217,5.7565411353\H,11.008908734,9.2051420131,5.65580  
95089\H,10.8289487672,8.2107823264,4.195953299\O,9.0058401808,3.475926  
1738,4.831176747\O,10.1985405165,4.6467214243,3.3161313992\C,11.354522  
9495,3.840151943,3.6232782855\C,12.5112692101,4.394859253,2.8167108751  
\H,11.5400525407,3.8840855961,4.7008450476\H,11.1305649947,2.800691998  
3,3.3649083671\H,12.7037617197,5.4382973972,3.0827063642\H,12.29349042  
76,4.3470869413,1.7461149239\H,13.4176273729,3.813970846,3.0134266629\  
H,2.3756318825,2.516894697,0.8850150282\H,0.7424378465,3.1718623636,1.  
083072608\H,1.3619234207,1.9797118862,2.2486878275\C,1.1358125189,4.51  
08671393,3.45801593\H,1.5428890212,5.3337309089,4.0555236684\H,0.79973  
53583,3.721797128,4.131190954\H,0.2700480647,4.8876650777,2.9014293182  
\C,8.1106322165,2.9893404903,-2.7023767272\C,8.8806106474,2.6513846329  
, -3.8165936702\C,6.9978702206,3.8299499357,-2.8461521659\C,6.659119367  
1,4.3209046188,-4.1145123843\C,7.4261466937,3.9755087866,-5.2256915219  
\C,8.538016977,3.1419238893,-5.0773603465\H,8.3571229226,2.6083460311,

-1.714598974\H,9.743489992,2.0025369509,-3.6996125422\H,7.157926818,4.3553655366,-6.2070568552\H,9.1338096652,2.874328041,-5.9449931379\H,5.7948237309,4.9673756872,-4.2310547211\P,6.0493746522,4.2548942425,-1.3359472072\C,6.4735016683,6.0032423407,-1.0129754808\C,4.3092026167,4.3103066841,-1.9458306346\C,7.6892602465,6.5354973452,-1.4609264148\C,5.6737823253,6.7678663221,-0.1462323802\C,6.0753880661,8.0432475911,0.2436730971\C,8.0989062076,7.8033231122,-1.0463098416\C,7.2962421113,8.5594018391,-0.193396108\H,8.3218174621,5.9547616922,-2.1235108609\H,4.7417134871,6.3630118661,0.2326378201\H,5.4447925612,8.6241706611,0.9095236483\H,7.622771269,9.5392875908,0.1386099095\H,9.0506334547,8.1974643816,-1.3892832457\C,3.708747282,5.5192766973,-2.3207817177\C,3.5416085572,3.1238548322,-2.0488145722\C,2.2139254492,3.1887883016,-2.5002722752\C,1.6290834949,4.4061533949,-2.8320016044\C,2.3831038627,5.5748840663,-2.748880408\H,1.6451184409,2.2703236772,-2.5786521266\H,0.5952213011,4.4379051765,-3.1599769254\H,1.9462582582,6.5308507028,-3.0209542275\H,4.2861207491,6.4339116115,-2.2678459263\C,4.0585505681,1.7821821275,-1.7253960947\O,3.4812618222,0.7726088505,-2.4234756409\C,4.1023051335,-0.4615946076,-1.990527125\N,4.9501736588,1.4463507286,-0.8574342145\C,5.0796649748,-0.0310340687,-0.8627468121\H,4.6054431753,-0.9039050825,-2.8535374605\H,3.317342812,-1.1314138234,-1.6351611902\Pd,6.2380018931,2.6810155434,0.3484164174\H,6.1139323673,-0.2744099185,-1.1202178954\C,4.746697615,-0.6407866684,0.4783931236\C,5.5859998422,-1.60051584,1.0448562187\C,3.5822555596,-0.2611471723,1.1543868846\C,5.2653155976,-2.1783068184,2.2743718508\H,6.4997793406,-1.8862557453,0.5301973562\C,3.2695202631,-0.8184564317,2.3913127174\H,2.9391131268,0.5017725089,0.7317331624\C,4.1091979394,-1.7867712344,2.9488248525\H,5.9248961235,-2.9228774931,2.7097340563\H,2.3929316672,-0.4764371212,2.9309651255\H,3.8662526451,-2.2235994438,3.9113460404\H,8.5951446796,5.4199919234,1.4741106992\H,6.8912822994,5.7053853277,1.6798052805\

### Int3'-B

1\1\GINC-OMC-1-822\Freq\RB3LYP\GenECP\C59H62N1O6P1Pd1\SHIMGRP\10-Nov-2023\0\#P Geom=AllCheck Guess=TCheck SCRF=Check GenChk RB3LYP/GenECP Freq\TS2\0,1\C,1.4747151078,3.6045438958,-0.3809104215\C,1.3182174672,2.5870346447,-1.4610698223\C,1.8687568713,1.3099812957,-1.2776469338\C,2.1054717175,3.1711629595,0.8856454295\C,2.4397272949,1.8575648758,1.0403584967\C,2.2871348138,0.8529287685,0.0053930199\H,1.9371670869,0.6249208452,-2.1112685264\H,2.8713847281,1.5072310855,1.9666179134\C,0.8542164234,3.0593948021,-2.8476063348\C,2.4348006149,4.2091268936,1.966287942\O,1.1099121368,4.7839171006,-0.551993307\C,0.7779741865,1.8932939272,-3.8491436173\C,-0.5370893215,3.7258698206,-2.7709431124\H,1.762792734,1.4644076263,-4.0622100867\H,0.3641746567,2.2531045498,-4.7960543145\H,0.1321191137,1.0889810389,-3.4848104084\C,1.1635460754,4.9484371926,2.4322822239\H,0.6982061304,5.4563175475,1.5895156133\H,1.42214



61786,5.6902534444,3.1963396999\H,0.4472981499,4.2474988336,2.87503392  
92\C,3.4326330958,5.2347322227,1.3795336888\H,3.0011012537,5.739736082  
,0.5147327339\H,4.3584346328,4.7368327149,1.0715518037\H,3.6874801198,  
5.9860090889,2.1358109018\C,3.0813158641,3.560656836,3.2023373324\H,2.  
4177931764,2.8252321929,3.6696575161\H,3.2967027073,4.335938575,3.9443  
887397\H,4.0243260344,3.060119715,2.9614234075\C,3.0979303348,-0.44639  
79815,0.1823124843\C,0.1855971304,-0.5310823295,1.4208393772\C,2.45582  
38517,-1.5732806649,1.0847934488\C,0.9290831577,-1.7554860301,0.973013  
8688\C,3.6467199958,-0.9448194805,-1.1446795772\H,3.9744255864,-0.1420  
178666,0.7581331117\C,4.902662596,-0.4715305009,-1.5504854695\C,2.9613  
779337,-1.8216835862,-1.991588138\C,3.527228723,-2.2274147582,-3.20280  
86121\C,5.4637219594,-0.8630201469,-2.7632886296\C,4.7764119566,-1.750  
5944882,-3.5945622449\H,5.2126129796,-2.0670490295,-4.5374074589\H,2.9  
78293094,-2.9161474631,-3.8351926631\H,5.4435365028,0.2106255512,-0.89  
99900567\H,6.4384707733,-0.4832276516,-3.0551703737\H,1.9878073942,-2.  
2044238458,-1.7165740039\C,3.1152772541,-2.923705882,0.7662842781\C,2.  
7903197995,-1.2885929821,2.5652901098\C,-0.0964163627,-0.1975445937,2.  
640918481\C,-0.4093221222,0.189444272,3.8607056187\H,0.2778117594,-2.5  
485088533,5.0588834066\H,-1.381431472,-0.0267006267,4.2956730216\O,2.5  
329099674,-3.9089760191,0.3667282302\O,4.4384382914,-2.8633151852,0.99  
74118884\C,5.2074769656,-4.0412468916,0.6561104946\C,5.1592979226,-5.0  
661020096,1.7766585109\H,6.2181291919,-3.6626186649,0.4921658667\H,4.8  
162576897,-4.448823254,-0.2787890037\H,5.5069421439,-4.6267621324,2.71  
6122759\H,5.8048682694,-5.9161628184,1.5331549493\H,4.1395423846,-5.43  
27646334,1.912120664\O,3.444993278,-0.3619925702,2.9916126209\O,2.2512  
05164,-2.2394044144,3.3440377102\C,2.3465103966,-2.0492043086,4.774340  
2517\C,1.2563915847,-2.8907455162,5.4054320806\H,3.3494742998,-2.34905  
4092,5.0954171916\H,2.2218443436,-0.9865447327,4.9907245467\H,1.373151  
3371,-3.9461185937,5.1433179546\H,0.2966659095,0.7513471873,4.46901983  
04\H,1.2966774904,-2.7974825896,6.4951408912\H,-1.2919106148,3.0192589  
882,-2.4193538407\H,-0.8359960972,4.0729336581,-3.766726935\H,-0.52126  
59928,4.5728638226,-2.0878699462\C,1.8788956686,4.0835515352,-3.393765  
1063\H,2.873427105,3.6303977545,-3.4705483131\H,1.9369018713,4.9535551  
402,-2.7397981076\H,1.5785907488,4.4139590475,-4.3945016679\C,-2.78404  
18119,0.634806845,-2.6496177867\C,-3.5613804762,0.2774620727,-3.750642  
7388\C,-3.3167159613,0.5813768535,-1.3598287079\C,-4.6451435286,0.1755  
76307,-1.180855121\C,-5.4223739885,-0.1790204544,-2.2811328475\C,-4.88  
16678612,-0.132385795,-3.5688179027\H,-1.7567178579,0.9436639138,-2.79  
18744995\H,-3.1299091182,0.3121161766,-4.7463230147\H,-6.4499053626,-0  
.4983127488,-2.1334904551\H,-5.4875700326,-0.4158800734,-4.4240892415\  
H,-5.0627601532,0.1215536878,-0.1808710687\H,-2.2809876055,1.110494645  
3,0.055173858\C,-2.7060621476,2.8964040723,0.162397066\C,-3.0902736604  
,0.3827440393,1.551289684\C,-3.8832669992,3.4189036762,-0.3943702448\C  
,-1.8094598314,3.761367423,0.8036133807\C,-2.0902086522,5.1231348992,0

.8989039341\C,-4.155940746,4.7828901562,-0.3056527628\C,-3.2616067737,  
5.6364348836,0.3422659369\H,-4.5808888208,2.7643516887,-0.9031576142\H  
,-0.8848232237,3.3681728164,1.211361693\H,-1.3844412215,5.7812152012,1  
.3912251702\H,-3.471967939,6.6998958616,0.4046310781\H,-5.0662197812,5  
.1782052387,-0.7466676802\C,-3.7105625893,1.2488869383,2.4598851483\C,  
-2.9894523278,-0.9888719809,1.9018124537\C,-3.4872509334,-1.4316993018  
,3.133920205\C,-4.1071078746,-0.5506835026,4.0175867278\C,-4.226459570  
9,0.7923922641,3.6738652798\H,-3.386991858,-2.4813067794,3.3832890853\  
H,-4.4927123577,-0.9156000352,4.9643834283\H,-4.7086901675,1.493286564  
7,4.3481026236\H,-3.7881014345,2.3015894457,2.2197771895\C,-2.46192611  
35,-2.0140557617,0.9868724674\O,-2.0438244716,-3.1897991224,1.55198147  
56\C,-1.585131327,-4.0173724056,0.4464354083\N,-2.4660386286,-1.937527  
2858,-0.2861715257\C,-2.1149658994,-3.2644280796,-0.8040880139\H,-2.00  
92598551,-5.0141864754,0.5749653922\H,-0.4942523116,-4.0719029911,0.47  
51385924\Pd,0.0345118449,0.8929116495,-0.004873144\H,-3.0582902773,-3.  
7269009867,-1.1314074009\C,-1.2024990855,-3.2329354642,-2.0073991637\C  
,-0.6689641327,-2.0314918797,-2.481530636\C,-0.9403810216,-4.418785478  
7,-2.7039731595\C,0.086885195,-2.0131216192,-3.6547223137\H,-0.8590424  
732,-1.1183889042,-1.930297287\C,-0.1730353552,-4.4032965129,-3.867100  
4523\H,-1.3553960375,-5.3576375252,-2.3449332964\C,0.3299810522,-3.195  
102164,-4.354384409\H,0.4969401411,-1.075721974,-4.0152003386\H,0.0190  
064846,-5.3293928206,-4.4006356986\H,0.9089504284,-3.1759746655,-5.272  
9177764\H,0.6568699577,-2.6046959056,1.600171017\H,0.6723313495,-2.011  
9230018,-0.0546279795\

### TS3'-B

I\1\GINC-OMC-1-812\Freq\RB3LYP\GenECP\C59H62N1O6P1Pd1\SHIMGRP\14-Nov-2  
023\0\#p freq genecp b3lyp empiricaldispersion=gd3bj geom=check guess  
=read\TS2\0,1\C,-1.1802323923,3.3076462365,-1.0823878432\C,-0.643636  
232,2.2531381414,-1.9662539979\C,0.5239756254,1.5798124672,-1.57678686  
2\C,-0.372214099,3.700788423,0.1074056884\C,0.7672112579,3.0237054306,  
0.4038835107\C,1.2184974804,1.8578220393,-0.319947424\H,1.0397213497,0  
.9559582717,-2.2937584371\H,1.3611893705,3.2910099689,1.2678108778\C,-  
1.2291608127,2.1040239525,-3.3813604834\C,-0.8519429936,4.8743516908,0  
.9694848902\O,-2.2536347021,3.8904864426,-1.3399705956\C,-0.5142501659  
,0.9994049159,-4.1741568887\C,-2.7296435682,1.7433461661,-3.3333200942  
\H,0.5498982096,1.2080223857,-4.3258073079\H,-0.9776089407,0.902412900  
3,-5.1613300779\H,-0.6025634222,0.0372166844,-3.659946227\C,-2.2332896  
984,4.5353329051,1.5766137926\H,-2.9716318543,4.3943300052,0.789031359  
4\H,-2.5638993346,5.3513123858,2.2295520876\H,-2.1725360741,3.61994612  
73,2.1746830884\C,-0.956986908,6.1548880581,0.1097265814\H,-1.65765023  
1,6.0127368708,-0.7121788049\H,0.0225495605,6.4208953969,-0.3028561703  
\H,-1.3003241068,6.9917187696,0.7285691416\C,0.1128513416,5.1641767071  
,2.1318992911\H,0.2046214131,4.3091154163,2.8089437263\H,-0.2679948939

,6.0098397938,2.7130081154\H,1.1146874939,5.4286819901,1.7783140702\C,  
2.7306562064,1.5252610795,-0.1964129703\C,0.5721246217,0.3171250255,0.  
9674365547\C,2.98573575,0.334686829,0.7964093913\C,1.7558337814,-0.581  
8351708,0.8125081744\C,3.411952956,1.386110995,-1.5451427536\H,3.17856  
17212,2.3948483135,0.2854952007\C,4.075432104,2.5048017802,-2.06365564  
92\C,3.3857588756,0.2107675912,-2.3086687179\C,4.0218633109,0.16094281  
05,-3.5497650546\C,4.7015007737,2.4598895658,-3.308090891\C,4.67958241  
91,1.2820005081,-4.0555763777\H,5.1692976622,1.2383067954,-5.023808797  
9\H,3.9936067837,-0.7604309702,-4.1194068428\H,4.0995877466,3.42075283  
57,-1.4797135918\H,5.2089482525,3.3411093349,-3.6893300144\H,2.8751792  
467,-0.6750821022,-1.9488026285\C,4.2444733927,-0.4633810558,0.4688165  
449\C,3.1513875728,0.8865270353,2.2253017584\C,0.0136613487,0.70648723  
56,2.0741270736\C,-0.5474059979,1.2088751125,3.1516404156\H,1.25620699  
63,-0.2613877391,4.6498709317\H,-1.4920218346,0.836374138,3.5371185386  
\O,4.2707906227,-1.6482406584,0.206094739\O,5.3266524541,0.3296958528,  
0.5175132531\C,6.5908657634,-0.2788529835,0.160054852\C,7.1906026759,-  
1.0221934979,1.3416189447\H,7.2130335177,0.5618314071,-0.1523025556\H,  
6.4246228085,-0.9429457838,-0.6912050144\H,7.3035356309,-0.3540338902,  
2.2001440334\H,8.1782763782,-1.4119057539,1.0747974224\H,6.5520168203,  
-1.8609236368,1.62693808\O,3.0176840802,2.0413203322,2.564182453\O,3.4  
294839203,-0.1310904944,3.0613243622\C,3.3785683008,0.1115673391,4.488  
2200687\C,2.1926512265,-0.6452807707,5.0627408124\H,4.3285679866,-0.25  
46744426,4.886344565\H,3.307436277,1.1871187749,4.657386437\H,2.262361  
8098,-1.7098788947,4.820962231\H,-0.0651882322,2.0184723871,3.69718020  
66\H,2.1695802631,-0.5351416563,6.151892088\H,-2.8639443355,0.77297729  
5,-2.8430951787\H,-3.1317480851,1.6774032209,-4.3514858749\H,-3.291430  
8292,2.4879583181,-2.7730197522\C,-1.0446122734,3.4428491812,-4.132553  
4331\H,0.0176688812,3.7010342432,-4.2039973244\H,-1.5691635859,4.24836  
01243,-3.6168277678\H,-1.4436896775,3.3629043852,-5.1499406571\C,-3.32  
05894359,-2.4228585381,-2.0851517635\C,-3.7882921667,-3.5132737904,-2.  
8174975105\C,-3.2866099767,-2.4716796045,-0.685655582\C,-3.7335082216,  
-3.6228096401,-0.0285462092\C,-4.1977368008,-4.7142563026,-0.762319427  
8\C,-4.2244586384,-4.6633132183,-2.1574841296\H,-2.9751725718,-1.52963  
46095,-2.5983191305\H,-3.8073228491,-3.4657425455,-3.9022702095\H,-4.5  
377321951,-5.606238999,-0.2439878265\H,-4.5841338237,-5.5150963247,-2.  
7268204258\H,-3.7065612827,-3.6687453374,1.0554139326\H,-2.6830773871,  
-0.9843000997,0.1983169268\C,-4.1999759466,0.0592418121,0.1930052269\C  
,-2.5160020076,-1.481098582,1.9735855389\C,-5.4952409022,-0.4814991109  
,0.1967747293\C,-4.0394232094,1.4501812558,0.1358623123\C,-5.151374697  
9,2.2901537484,0.0879204723\C,-6.6060731268,0.3597568148,0.1538195275\  
C,-6.4358992947,1.7460064409,0.0986850653\H,-5.632437661,-1.5576781398  
,0.224153262\H,-3.0428695222,1.8727236884,0.0975786948\H,-5.0033726882  
,3.3626145416,0.0189750248\H,-7.3038477669,2.3972698234,0.0524198819\H  
, -7.6050883698,-0.0665916367,0.1543489124\C,-3.4260620051,-0.966899429

9,2.9085906085\C,-1.4050843965,-2.2147931464,2.4693654741\C,-1.2305040  
693,-2.3773895119,3.8508293506\C,-2.1462806787,-1.8509293728,4.7561564  
465\C,-3.2563933686,-1.1564287975,4.2804888347\H,-0.366810702,-2.92929  
08513,4.2008545879\H,-1.9955962502,-1.9885656417,5.8221716667\H,-3.987  
7524438,-0.748646952,4.971696424\H,-4.2788197739,-0.3992259041,2.55831  
51742\C,-0.4364946594,-2.8655092599,1.5798362788\O,0.6956349938,-3.368  
9686541,2.1682641037\C,1.4976224676,-3.9264401355,1.0917335065\N,-0.57  
89839464,-3.0429678394,0.3243541461\C,0.5493979043,-3.8642106369,-0.13  
65262662\H,1.7787553247,-4.9414583999,1.3775034589\H,2.3934850742,-3.3  
123964753,0.9714981637\Pd,-0.9101238922,0.2215449421,-0.6599409007\H,0  
.1386752895,-4.8663879423,-0.3320148215\C,1.1539565697,-3.3837410248,-  
1.4391691655\C,0.3571043881,-2.7056050996,-2.3705922897\C,2.4725422061  
,-3.7062872794,-1.7767651988\C,0.8633286557,-2.3933592945,-3.632090206  
8\H,-0.658529341,-2.4427224401,-2.101165175\C,2.9794834571,-3.38715911  
77,-3.0370837433\H,3.1127817806,-4.210508008,-1.0600053995\C,2.1697472  
702,-2.7452390457,-3.9743252133\H,0.2345124694,-1.8802457743,-4.351517  
8354\H,4.0051656595,-3.6436742297,-3.2841251992\H,2.5537394693,-2.5142  
783489,-4.9632878958\H,1.8264195041,-1.2884720148,1.6381104359\H,1.710  
9839946,-1.146318298,-0.1191108543\

### Int3''-B

1\1\GINC-A06R03N07\Freq\RB3LYP\GenECP\C59H62N1O6P1Pd1\ACJSGGHI7X\11-Ja  
n-2024\0\#P Geom=AllCheck Guess=TChech SCRF=Check GenChk RB3LYP/GenEC  
P Freq\tBu\0,1\C,4.643521082,1.863153261,0.2427105115\C,3.7792339024  
,1.6610925785,1.3988413246\C,3.1968708605,0.4199689642,1.6056209147\C,  
3.3787406295,-0.6724763877,0.7370386636\C,4.2569086762,-0.4940447202,-  
0.3426623505\C,4.9016976355,0.7066522937,-0.6008965871\H,2.5816302839,  
0.2691074245,2.4851067677\H,4.4667457601,-1.3377497812,-0.9818038253\C  
,5.9075636174,0.8325574351,-1.7555304038\C,3.5734217748,2.8188813312,2  
.3885882016\C,7.2813260836,1.2545585641,-1.1863320062\H,7.1839122688,2  
.1964695959,-0.6457416927\H,8.010872547,1.3773111311,-1.9967998337\H,7  
.6606944785,0.4892907154,-0.5000876074\C,5.4336706576,1.8936583681,-2.  
7746798996\H,5.3241741542,2.8576682375,-2.2766916476\H,4.4724740875,1.  
601812122,-3.2129382093\H,6.1620733926,1.9901877937,-3.5896166862\C,6.  
0966670346,-0.4911799574,-2.5167736177\H,6.4598567112,-1.291983118,-1.  
8638566387\H,6.8353332717,-0.3505801745,-3.3132983705\H,5.1658551788,-  
0.8295025962,-2.986897278\C,2.9807028718,4.0533613124,1.6711480711\H,3  
.6344711645,4.3537783944,0.8531031294\H,2.8718463623,4.8864117908,2.37  
82912241\H,1.9897994681,3.8214115097,1.2673287375\C,4.9382785765,3.202  
9494779,3.0016193746\H,5.6306146003,3.4794121055,2.2052690846\H,5.3581  
075705,2.3583163437,3.5588759626\H,4.8284658419,4.048529906,3.69274750  
19\C,2.6098184365,2.4506263077,3.5300738796\H,1.6172404552,2.194023800  
2,3.1427892937\H,2.4954304974,3.3077624551,4.2032047132\H,2.9767310803  
,1.6089140174,4.1273658618\O,5.1408446407,3.0100712928,-0.0233216872\C

,2.5816258688,-1.9303848552,0.9915202166\C,3.1536699026,-3.2420049635,  
0.4836642661\H,2.491461671,-2.0546104953,2.0720143243\C,3.4235771189,-  
3.5331583634,-0.8635208979\C,3.9150396617,-4.7794362127,-1.2465739233\  
C,4.1440096225,-5.7746144137,-0.2937479908\C,3.3812655783,-4.256481301  
8,1.4236351015\C,3.871830505,-5.5075038081,1.0468367776\H,3.2384552535  
,-2.7931619024,-1.6303830914\H,3.1646134822,-4.0608224685,2.4699398125  
\H,4.0406897146,-6.2692607807,1.8023958606\H,4.1189710883,-4.972276358  
6,-2.2958059462\H,4.5295777963,-6.7442604944,-0.5946695859\C,-3.751628  
6547,1.6439687222,-2.6829711372\C,-4.8367475921,2.1317566225,-3.410737  
5418\C,-3.0943698676,2.4726659019,-1.7626980258\C,-3.5334270699,3.7902  
057787,-1.5760873957\C,-4.6232375595,4.2709998472,-2.3010554826\C,-5.2  
749731811,3.4434064864,-3.2180181294\H,-3.40924453,0.6216987276,-2.818  
2897277\H,-5.3404851162,1.4871628551,-4.1245560677\H,-4.9619109694,5.2  
915349206,-2.1514197555\H,-6.1228977872,3.8209096073,-3.7813237352\H,-  
3.0251247868,4.4357183096,-0.8670836515\H,-1.6594389554,1.8147685456,-  
0.8400132882\C,-0.1904791157,2.4699229113,-1.6732474195\C,-1.777009149  
2,2.6354923958,0.8029518381\C,-0.3184379757,3.007525627,-2.9647231747\  
C,1.0768199939,2.404942413,-1.0642915578\C,2.1919897463,2.9154847285,-  
1.7270269772\C,0.8081711708,3.484960149,-3.6316717225\C,2.057316223,3.  
4474666968,-3.011213614\H,-1.2895956358,3.059085331,-3.4431311218\H,1.  
1979195513,1.9732442394,-0.0772158888\H,3.1584887306,2.9180800989,-1.2  
38012291\H,2.9347969222,3.8297701526,-3.5226694121\H,0.7035120884,3.89  
79373659,-4.6305129266\C,-0.8862476862,3.6625957013,1.1209097995\C,-2.  
7293174051,2.2424832388,1.7812483971\C,-2.7403033569,2.8748715283,3.03  
32994775\C,-1.8189020196,3.8723932641,3.3394875473\C,-0.8925226645,4.2  
685340012,2.3788766097\H,-3.4731735862,2.5622444191,3.7670840727\H,-1.  
8272294443,4.3339681502,4.3212265696\H,-0.1601117297,5.0378599807,2.59  
92261713\H,-0.1569482399,3.9827422731,0.3890505356\C,-3.7126683087,1.1  
777156322,1.5633298413\O,-4.7452845751,1.0992621805,2.4358328527\C,-5.  
4141757107,-0.1666881942,2.1640145655\N,-3.708216732,0.2821171591,0.63  
38322624\C,-4.9394670637,-0.5240373256,0.7416043958\H,-6.4875953953,-0  
.0066045159,2.2556583367\H,-5.0742073748,-0.8961550245,2.9061250011\Pd  
,-2.0439237909,-0.3772357588,-0.521193063\H,-5.6479136531,-0.146457687  
5,-0.0068961738\C,-4.6679214215,-1.9817538366,0.4658145853\C,-5.539882  
6056,-2.7178544722,-0.3404070564\C,-3.5189436856,-2.6029149847,0.98093  
47727\C,-5.2795330709,-4.0598561133,-0.6208668197\H,-6.4213847692,-2.2  
366976822,-0.756025106\C,-3.2550802376,-3.9440869149,0.6956859606\H,-2  
.8326108517,-2.0557184393,1.6202300276\C,-4.1367522352,-4.6728018814,-  
0.104262798\H,-5.9643494037,-4.6219982782,-1.2483007984\H,-2.352045861  
2,-4.3905854808,1.0944099366\H,-3.9306238104,-5.7147934973,-0.32828480  
53\C,1.0146721533,-1.7170453644,0.53828186\C,0.9341219688,-1.099012745  
2,-0.8758048234\C,-0.4419660056,-1.0645161218,-1.4897426107\H,1.590375  
9128,-1.6619066651,-1.5387735763\H,1.3362570844,-0.0885429965,-0.81908  
30611\C,-0.8387999467,-1.5564663305,-2.6246010844\C,-1.2974397356,-2.0

416082398,-3.7631986347\H,-1.1876379182,-1.4974898725,-4.6988046755\H,  
-1.7860771029,-3.0121628554,-3.8090939561\C,0.3222951215,-3.0774618909  
,0.5956432612\C,0.4199343834,-0.7629498769,1.5720651831\O,0.4554294846  
,-1.2499742,2.8186778516\O,0.490468988,-3.7200381799,-0.5715810301\O,-  
0.2564185711,-3.552223784,1.5558065543\O,0.0037654589,0.3564547792,1.3  
209633848\C,-0.1106088748,-0.4247316849,3.8610959422\C,-1.6116109582,-  
0.6461441641,3.954784069\H,0.1269270384,0.6209644271,3.6611199745\H,0.  
401036433,-0.7471293399,4.7694997362\H,-2.0938218893,-0.3256184984,3.0  
295895693\H,-2.0285940463,-0.0585704355,4.7790999785\H,-1.8360356215,-  
1.7026538165,4.1244172137\C,0.156427127,-5.1189209289,-0.6630415986\C,  
-0.7711471683,-5.3175565284,-1.8481069842\H,-0.2944035242,-5.439773163  
2,0.2771730602\H,1.1079802215,-5.6408914051,-0.7993324773\H,-1.7176664  
502,-4.7938507106,-1.6894368951\H,-0.9792355164,-6.3836965102,-1.98699  
79143\H,-0.312592756,-4.9306761488,-2.7619390088\

### TS3''-B

I\1\GINC-OMC-1-818\Freq\RB3LYP\GenECP\C59H62N1O6P1Pd1\SHIMGRP\02-Nov-2  
023\0\#p freq genecp b3lyp empiricaldispersion=gd3bj geom=check guess  
=read\TS2\0,1\C,0.3989272143,3.4658887388,-0.0086888128\C,0.83093978  
68,2.774906771,-1.2248874346\C,1.8469902687,1.8616758638,-1.1393589145  
\C,1.2015776188,3.2412954745,1.2311515704\C,2.3245152868,2.41023313,1.  
1661453197\C,2.585939598,1.607170227,0.0658193477\H,2.1486571762,1.325  
1576092,-2.0268278257\H,2.9470962508,2.2846708911,2.0399125692\C,0.158  
9193765,3.1013548063,-2.5668390976\C,1.0428943603,4.2387802314,2.39517  
0055\O,-0.5735892717,4.2565853554,-0.0067401234\C,0.8140910095,2.33474  
39249,-3.7287452503\C,-1.3357393377,2.7198026361,-2.5324864252\H,1.880  
2322314,2.5660062563,-3.8252884175\H,0.3255040218,2.6144709613,-4.6677  
493235\H,0.7077599189,1.2540556894,-3.6055359161\C,-0.3898060919,4.282  
9587134,2.9711622282\H,-1.1236889954,4.3861281326,2.1749361357\H,-0.48  
06546537,5.1390460355,3.6490347939\H,-0.6116288143,3.3846330858,3.5542  
174059\C,1.3995266151,5.6430070568,1.844737605\H,0.6903058974,5.943773  
9427,1.0731125962\H,2.4076047773,5.6448498926,1.4168148471\H,1.3727674  
891,6.378066863,2.6570744032\C,2.0036240281,3.9287361058,3.5578073855\  
H,1.8703552574,2.913270277,3.9456830614\H,1.8087468598,4.6263112183,4.  
3785546514\H,3.0526717797,4.0443158968,3.2698133433\C,3.7763650307,0.6  
55671434,0.1257652874\C,0.9125722268,-0.3179244034,0.2209840838\C,3.35  
16444305,-0.783729482,0.608151377\C,2.0301539261,-1.2339262018,-0.0278  
957876\C,4.6192609349,0.6480012196,-1.1415791515\H,4.4238514326,1.0251  
515019,0.9222535846\C,5.8412436027,1.3329668848,-1.1270025255\C,4.2411  
831431,0.0034528524,-2.3285218633\C,5.0563133772,0.0479856419,-3.45968  
79857\C,6.6586289208,1.3816815859,-2.2550520482\C,6.2679845222,0.73733  
82691,-3.4295211681\H,6.9010052017,0.772183056,-4.3110050876\H,4.73998  
04405,-0.459244486,-4.3665869945\H,6.1518284831,1.8342089467,-0.214551  
7205\H,7.6003377286,1.9212532925,-2.2154570141\H,3.3073216122,-0.54043

69358,-2.3851233309\C,4.4397359772,-1.7998811767,0.2559406275\C,3.1739  
316558,-0.8034233601,2.1367261755\C,0.1035142653,0.324988997,1.0172480  
043\C,-0.1130376298,1.2364034644,2.0111651754\H,0.5787763638,1.2959222  
098,2.84444325\H,-1.0832095184,1.6952263311,2.1462001634\O,4.300181172  
6,-2.7390282997,-0.4982166225\O,5.5875799514,-1.4875455313,0.882591992  
3\C,6.7366425226,-2.3130664518,0.5739492968\C,6.7381514122,-3.57866373  
14,1.4144214992\H,7.5932781732,-1.6743405837,0.7972083294\H,6.72147745  
62,-2.540705388,-0.4941841734\H,6.7005804453,-3.3344082429,2.479886510  
5\H,7.6507261977,-4.1524413749,1.2232452502\H,5.8778804962,-4.20283173  
64,1.1628870058\O,3.341763941,0.1268313788,2.8934236212\O,2.7825056116  
,-2.0327024358,2.5261635249\C,2.3902125515,-2.1985708622,3.9119079398\  
C,0.8941154419,-1.9727033598,4.0535904512\H,2.670131637,-3.2260521182,  
4.1551024956\H,2.9705367459,-1.506595985,4.5249750811\H,0.3369595574,-  
2.6312862906,3.3836124645\H,0.6328133134,-0.9410946219,3.8073387701\H,  
0.5833879722,-2.1701445608,5.0850267693\H,-1.457995995,1.6680802292,-2  
.241476569\H,-1.7854579841,2.8613546621,-3.5232334624\H,-1.8735884212,  
3.334530519,-1.8140453124\C,0.2989265265,4.6118119257,-2.8614587865\H,  
1.3556438397,4.8928928762,-2.9308714482\H,-0.1692311997,5.2015149637,-  
2.073571756\H,-0.1797970854,4.8542690154,-3.8175363172\C,-4.6520358784  
,-0.7331465786,-2.4025477174\C,-5.6023714382,-1.3144057076,-3.24032976  
76\C,-4.5840840742,-1.0907679491,-1.047831229\C,-5.4795799194,-2.03989  
80127,-0.545555509\C,-6.4288004523,-2.6230090179,-1.3853281633\C,-6.49  
20475932,-2.2636053959,-2.7326530793\H,-3.9600441815,0.0079380728,-2.7  
956636209\H,-5.6471573534,-1.0285271885,-4.2870426554\H,-7.1193025081,  
-3.3605455346,-0.9866255389\H,-7.2305708147,-2.7208064632,-3.384289187  
7\H,-5.4291917527,-2.3269084023,0.499203413\P,-3.2932449126,-0.2689298  
477,-0.0375469845\C,-4.0284065652,1.4008590684,0.1701962527\C,-3.47051  
8336,-1.0031048981,1.6592571284\C,-5.4148868545,1.6250617555,0.1594044  
458\C,-3.1628451394,2.4873320484,0.3383744419\C,-3.6646543162,3.778801  
8014,0.5020294522\C,-5.9169307195,2.9142201423,0.3304235495\C,-5.04291  
60332,3.9918888417,0.5031326305\H,-6.0963739128,0.7929403467,0.0144461  
939\H,-2.0920895637,2.3374692685,0.3035499897\H,-2.9616899765,4.599333  
4337,0.5919116695\H,-5.4388253951,4.9961761502,0.6233851321\H,-6.99050  
69183,3.0795287941,0.3202190936\C,-4.1342707214,-0.2888643035,2.665393  
7556\C,-2.8034324431,-2.1971477191,2.029483469\C,-2.7959020133,-2.6185  
553856,3.3651460966\C,-3.4618491685,-1.890197493,4.3467793796\C,-4.137  
4615242,-0.7253593693,3.9910075432\H,-2.262071624,-3.526819948,3.62080  
10633\H,-3.4503839149,-2.2296357516,5.3776483217\H,-4.6617675459,-0.14  
42612774,4.7436739945\H,-4.6424160715,0.6337252607,2.4140562354\C,-2.0  
855007477,-3.024781835,1.0480070861\O,-0.9506301329,-3.6367998047,1.50  
76115751\C,-0.453639537,-4.4353439404,0.4079309605\N,-2.4164199425,-3.  
2193022393,-0.1700679855\C,-1.3284512836,-3.9919089415,-0.7978270222\H  
,-0.5925556094,-5.4904666119,0.6621441981\H,0.6092016965,-4.2212306021  
,0.2965529983\Pd,-1.0016016313,-0.3844547731,-0.5754640988\H,-1.760049

6974,-4.8666095518,-1.298576217\C,-0.6093743507,-3.1401132995,-1.83700  
60234\C,-1.3061384579,-2.0920567159,-2.4765847676\C,0.7140811174,-3.39  
23892559,-2.2008289821\C,-0.6374684642,-1.2558495014,-3.3798246722\H,-  
2.370277795,-1.9867012699,-2.3128444676\C,1.3652754262,-2.5807081257,-  
3.1353204789\H,1.2656672286,-4.208271697,-1.7443513463\C,0.7037788876,  
-1.4947923702,-3.7040455338\H,-1.1741975325,-0.4381766328,-3.849616817  
\H,2.4013116438,-2.7859643589,-3.3869668238\H,1.2181075843,-0.84556182  
72,-4.4048884263\H,1.76075714,-2.2138911509,0.3758300463\H,2.174875028  
4,-1.3902866597,-1.093359384\

#### Int4'-B

1\1\GINC-OMC-1-820\Freq\RB3LYP\GenECP\C59H62N1O6P1Pd1\SHIMGRP\15-Nov-2  
023\0\#P Geom=AllCheck Guess=TCheck SCRF=Check GenChk RB3LYP/GenECP F  
req\TS2\0,1\C,-0.5557822444,2.5206185344,-0.988165961\C,-0.155836322  
2,1.2641038175,-1.6784775607\C,0.7578107715,0.3997971793,-1.006817007\  
C,-0.0242636768,2.7891737564,0.3938045895\C,0.9756918982,2.0330602447,  
0.8733863023\C,1.5721715794,0.8445370106,0.1912651231\H,1.2253076825,-  
0.3842148808,-1.584479023\H,1.4272878881,2.2571364413,1.8325281089\C,-  
0.4003545328,1.1693568106,-3.2077985257\C,-0.6068685305,3.9594077456,1  
.1991082462\O,-1.2968819559,3.3556604003,-1.5301954225\C,0.0832298412,  
-0.1764534657,-3.7757616483\C,-1.8891627059,1.3049091899,-3.5851667593  
\H,1.1592004413,-0.3155089668,-3.6544088365\H,-0.1331716647,-0.2117951  
421,-4.848532009\H,-0.438520133,-1.0124895867,-3.2991854762\C,-2.13520  
75315,3.7796823241,1.334736446\H,-2.6231286408,3.8213805918,0.36251704  
54\H,-2.5491343533,4.5763169192,1.9636250835\H,-2.3709535617,2.8201064  
653,1.8055365054\C,-0.2915800179,5.3021745673,0.5031630084\H,-0.721107  
8034,5.3295658472,-0.4973928688\H,0.7919068222,5.4457480682,0.42482660  
63\H,-0.6998218706,6.1330085715,1.0905693716\C,-0.0210924659,4.0105825  
395,2.6216221788\H,-0.2049177304,3.0789281846,3.1671016483\H,-0.494976  
7712,4.8264204317,3.1766297254\H,1.057192789,4.1992998522,2.6172976508  
\C,3.112505326,1.1934507732,-0.1692737527\C,1.760172478,-0.3117770347,  
1.1902774142\C,3.9685996881,0.0745608561,0.5270956978\C,2.982945865,-1  
.0832670793,0.7776970943\C,3.4268189419,1.4292845538,-1.625999547\H,3.  
3445489502,2.1182944793,0.3569517464\C,3.6846192523,2.7379091768,-2.05  
11365415\C,3.5295083509,0.3945871402,-2.5685440051\C,3.8995289788,0.66  
30688861,-3.8856808936\C,4.0460103731,3.0120924619,-3.3703195255\C,4.1  
608121611,1.9723707042,-4.292770379\H,4.4444938267,2.1796859138,-5.320  
0637831\H,3.9783668694,-0.1544850091,-4.5962001861\H,3.6086626078,3.54  
87973882,-1.3325176751\H,4.2389267225,4.036425462,-3.6744982513\H,3.34  
76500275,-0.6317796484,-2.2723841457\C,5.1887538393,-0.3689477352,-0.2  
687505782\C,4.4451188636,0.5928844404,1.8929274387\C,1.1604325636,-0.4  
501380187,2.3410560779\C,0.6291394516,-0.5803132084,3.5299387295\H,3.6  
201582824,0.4108903522,4.6472144781\H,-0.2455833807,-1.1941876822,3.71  
63836357\O,5.3299731844,-1.4587037784,-0.7810929831\O,6.0833584169,0.6



32445727,-0.3426586426\C,7.2496853718,0.3954628048,-1.1653540354\C,8.3  
111129784,-0.3780989581,-0.4013372891\H,7.5915356055,1.3955613396,-1.4  
386953207\H,6.9333822334,-0.136975934,-2.0653184131\H,8.5772892251,0.1  
430852327,0.5227855063\H,9.2132585602,-0.4783560117,-1.0135840239\H,7.  
9474814518,-1.3773032518,-0.1525545483\O,4.1825709553,1.6715260372,2.3  
782747836\O,5.1725976436,-0.3538657922,2.5176339791\C,5.5791893192,-0.  
0557700353,3.8745830423\C,4.432570384,-0.2915221548,4.8446650748\H,6.4  
148573897,-0.7335002322,4.0600535163\H,5.9301181339,0.9778772597,3.917  
6574012\H,4.0477934854,-1.3107015551,4.7483376338\H,1.047899115,-0.060  
3318648,4.3897438306\H,4.776719523,-0.1448940164,5.8734850335\H,-2.479  
0580106,0.5142043085,-3.1123817343\H,-1.9997172067,1.21506396,-4.67256  
87219\H,-2.2877674775,2.2670649339,-3.2730682758\C,0.3964021996,2.2987  
068087,-3.8968849455\H,1.4606750615,2.2174607512,-3.6738886836\H,0.040  
6367327,3.2762972745,-3.5670968773\H,0.2718130625,2.2366292108,-4.9843  
79991\C,-3.7800854746,-2.6566942688,-1.5251549862\C,-4.2319425975,-3.9  
569143763,-1.7475857454\C,-4.2513592463,-1.9157185782,-0.4315948707\C,  
-5.1783283897,-2.5022947621,0.4396601274\C,-5.6262441546,-3.8062122713  
,0.2205389597\C,-5.1542898389,-4.5352780908,-0.8722070381\H,-3.0434712  
261,-2.2096305289,-2.1867998653\H,-3.8575323329,-4.5210936981,-2.59668  
30001\H,-6.3416199657,-4.2527866973,0.9049549065\H,-5.5003815349,-5.55  
09176783,-1.0391110936\H,-5.5393945036,-1.9442814074,1.2979478066\H,-3  
.5473186174,-0.2345910535,-0.1804106787\C,-4.8230886063,0.895219552,-0  
.8480735062\C,-3.7133579967,-0.020754067,1.647027618\C,-6.1814767646,0  
.5604385553,-0.9466949291\C,-4.3911974036,2.1628674537,-1.2648845913\C  
, -5.3115972282,3.0905318607,-1.7528080044\C,-7.0958590033,1.4877070249  
, -1.4448275845\C,-6.6631731055,2.7550119591,-1.8435664015\H,-6.5215410  
821,-0.42309005,-0.6398088473\H,-3.3389990651,2.4199552628,-1.22209794  
02\H,-4.9646739551,4.06848866,-2.0720757456\H,-7.3782266781,3.47472423  
19,-2.2313409662\H,-8.1459646984,1.2213020854,-1.5227257721\C,-4.52601  
12575,0.9824883469,2.1845727172\C,-2.9676367019,-0.8315663118,2.540004  
385\C,-3.0885229073,-0.6426517871,3.9231567694\C,-3.8970547995,0.36803  
50883,4.4367193538\C,-4.610172045,1.1858537348,3.5630854929\H,-2.53729  
52367,-1.2946357467,4.5904653887\H,-3.9680387051,0.5125185095,5.509875  
0801\H,-5.2422836345,1.979632123,3.9494316977\H,-5.0987525746,1.613735  
3319,1.5157765714\C,-2.0803868356,-1.9053423001,2.0652430049\O,-1.8993  
819331,-2.9469651524,2.9305810602\C,-0.858823929,-3.7670816761,2.33692  
49888\N,-1.4762709128,-1.9934459398,0.9348879801\C,-0.9131976944,-3.36  
84551975,0.8579287293\H,-1.0944777059,-4.8112099966,2.5397698679\H,0.0  
924347429,-3.4891851421,2.8034492822\Pd,-1.2509784305,-0.178101108,-0.  
5124169707\H,-1.6887161345,-3.9634245813,0.3505548688\C,0.3584476016,-  
3.5049450818,0.0554852985\C,0.3819505033,-3.0169603956,-1.2565512418\C  
,1.4820952858,-4.1793700684,0.5425084779\C,1.5146333745,-3.171481714,-  
2.0536281403\H,-0.486354097,-2.48913886,-1.6375842136\C,2.6143173163,-  
4.3468746635,-0.2584483118\H,1.4882648735,-4.5822747755,1.5503950704\C

,2.6379134503,-3.8374638716,-1.5556976455\H,1.518667822,-2.7669471481,  
-3.0607844871\H,3.4839321384,-4.8600897765,0.1395766665\H,3.5280873167  
,-3.9444278648,-2.1665413651\H,3.3369827959,-1.7940232961,1.5218846112  
\H,2.8199192052,-1.621524484,-0.1571627447\

### 3a-B

1\1\GINC-OMC-1-821\Freq\RB3LYP\6-31G(d,p)\C32H40O5\SHIMGRP\15-Mar-2023

\0\#P Geom=AllCheck Guess=TCheck SCRF=Check GenChk RB3LYP/6-31G(d,p)

Freq\product\0,1\C,3.2705074291,-0.3435813386,-0.2011075318\C,2.6963  
890309,0.5716282761,0.8316229845\C,1.4058666912,0.428838594,1.17326554  
96\C,2.4370466304,-1.4850770361,-0.6926012855\C,1.1573662448,-1.571253  
1926,-0.2934444549\C,0.4707248713,-0.5736888108,0.5761866538\H,0.96523  
93197,1.0876041005,1.9106513103\H,0.511387121,-2.3685654786,-0.6410464  
997\C,3.5875845201,1.6679460503,1.4290228976\C,3.0689851806,-2.5053936  
399,-1.6479764422\O,4.4145975987,-0.1718929004,-0.6286113397\C,2.84018  
4194,2.4774339806,2.502549958\C,4.8358299552,1.039501367,2.0861705546\  
H,1.9708396352,2.9964076481,2.0866405938\H,3.5129312384,3.2360626576,2  
.9134821743\H,2.5062514007,1.8462276734,3.3331118727\C,4.3116070769,-3  
.1442470474,-0.9882746318\H,5.0703260588,-2.3944215298,-0.7673578429\H  
,4.7446415919,-3.8922525704,-1.6613066441\H,4.0345254107,-3.6493261496  
,-0.0566488452\C,3.4714461478,-1.8036477534,-2.9648268355\H,4.20335281  
17,-1.0178007224,-2.782171656\H,2.5925964414,-1.3613869589,-3.44725238  
56\H,3.9033797645,-2.5338787931,-3.658092381\C,2.0848236574,-3.6358720  
188,-1.9933328417\H,1.7629645711,-4.1816769715,-1.1003969503\H,2.57654  
44891,-4.3496129108,-2.661055474\H,1.1928568146,-3.262820094,-2.506732  
4804\C,-0.6725064708,0.1433208863,-0.3125958002\C,-0.3351087502,-1.222  
482247,1.7155639923\C,-2.0118580859,-0.1199838442,0.4485438312\C,-1.60  
89384376,-0.4377130317,1.9051014336\H,-1.4268516073,0.5074274792,2.429  
2778449\H,-2.3818464673,-0.9755123977,2.4542235877\C,-0.3105321425,1.5  
657026438,-0.6688143525\H,-0.7348750059,-0.4161970752,-1.2444573922\C,  
0.3568745899,1.7819978198,-1.879814879\C,-0.5104008484,2.658124712,0.1  
866957134\C,-0.0637913999,3.9301464314,-0.1682917833\C,0.8178118633,3.  
0496859784,-2.2309101928\C,0.6065980993,4.1309944972,-1.3755641191\H,0  
.961788419,5.1204377516,-1.6458786473\H,-0.2338386639,4.7639667388,0.5  
059828715\H,0.5308591996,0.9407864168,-2.5443607912\H,1.3410643433,3.1  
91379902,-3.1714172299\H,-1.0188452375,2.5260541167,1.1345034276\C,-3.  
0203919972,1.0184313382,0.3560658561\C,-2.6753246509,-1.3769391253,-0.  
1379989505\C,0.0131688238,-2.3137199997,2.3413784004\C,0.3769605927,-3  
.4078604589,2.9547728361\H,0.0872534422,-4.3893729035,2.5862000141\H,0  
.9871980515,-3.3796242661,3.8547217189\O,-3.394772846,1.696797825,1.28  
72929109\O,-3.4305910695,1.1645679733,-0.9156689558\C,-4.4211841516,2.  
1927648191,-1.1595501325\C,-5.8154383931,1.6745740607,-0.8505312069\H,  
-4.3008436784,2.4377638829,-2.2161904025\H,-4.1730955864,3.0657009259,  
-0.5522904576\H,-6.0309101544,0.7763716653,-1.4364130764\H,-6.56126058

52,2.4362252461,-1.0986054421\H,-5.9053771289,1.4352700552,0.211395300  
3\O,-2.171034968,-2.1470273088,-0.925216685\O,-3.9039332804,-1.5334857  
223,0.3831510206\C,-4.6584755551,-2.6783592239,-0.0830694784\C,-6.0471  
867341,-2.5673063792,0.5101148645\H,-4.6693049024,-2.665205021,-1.1763  
772534\H,-4.1407310098,-3.5883332204,0.2346545064\H,-6.5337219809,-1.6  
43705743,0.1845830631\H,-6.0061541217,-2.5685658248,1.602634517\H,-6.6  
586769312,-3.4143478697,0.1856688903\H,4.5447359393,0.3540875288,2.889  
7454005\H,5.459786888,1.8261197973,2.5243011049\H,5.4305402287,0.49052  
87227,1.3568272193\C,4.0102857469,2.6488838331,0.310696353\H,3.1286826  
491,3.0998294659,-0.1552820169\H,4.5913818044,2.1395332724,-0.45712699  
85\H,4.6206202642,3.452778446,0.7375415387\

#### Int4-B + HCO<sub>3</sub><sup>-</sup>

1\1\GINC-OMC-1-810\Freq\RB3LYP\GenECP\C60H63N1O9P1Pd1(1-)\SHIMGRP\14-N  
ov-2023\0\#P Geom=AllCheck Guess=TCHECK SCRF=Check GenChk RB3LYP/GenE  
CP Freq\product\1,1\C,-4.2526354595,-2.2985170944,1.087147288\C,-3.  
6857574226,-2.0775216694,-0.2685461034\C,-2.9559157702,-0.9701482135,-  
0.5039920154\C,-3.9387118782,-1.3042586712,2.1546885501\C,-3.193009908  
7,-0.2264824474,1.8517546076\C,-2.5537241808,0.0404386581,0.5260582913  
\H,-2.5128432169,-0.8327933477,-1.4775149037\H,-2.9833444123,0.5145394  
758,2.6085776313\C,-3.9501923943,-3.1169397668,-1.3686930999\C,-4.4961  
330724,-1.5334085165,3.5670592232\O,-4.9713051467,-3.2780330227,1.3339  
829939\C,-3.2473216723,-2.7426764853,-2.6857450098\C,-3.4074975585,-4.  
4924438519,-0.9202678042\H,-3.5971904694,-1.7820120995,-3.0789979072\H  
, -3.4714128085,-3.5052248175,-3.4390660808\H,-2.1610724117,-2.69134949  
54,-2.5825866147\C,-3.9730653619,-2.878857884,4.1191896847\H,-4.293338  
4867,-3.7066774215,3.4874585857\H,-4.3504275838,-3.0399397895,5.136671  
8894\H,-2.8780335556,-2.8726097576,4.1598579887\C,-6.0408642898,-1.546  
8001818,3.5293684826\H,-6.4031655862,-2.3406469391,2.8768101483\H,-6.4  
215666652,-0.5874502968,3.1614166618\H,-6.4408705001,-1.704989887,4.53  
85545206\C,-4.0565358413,-0.4246132974,4.5392472886\H,-2.9669528919,-0  
.3851541016,4.6433156041\H,-4.4786142605,-0.6251123781,5.5300822985\H,  
-4.4000326462,0.5646212767,4.2211848729\C,-2.8530208584,1.546722494,0.  
0806404209\C,-0.0693640213,0.6852485961,0.3365272773\C,-1.6678849426,2  
.5403317104,0.3987180796\C,-0.3194526152,2.0691092199,-0.1712930717\C,  
-3.3407019081,1.7007385933,-1.3508462399\H,-3.6711083634,1.8846407136,  
0.715925056\C,-4.6376851888,2.1885280868,-1.5653957078\C,-2.5646664311  
,1.3777996127,-2.4719317861\C,-3.0721952281,1.5154280253,-3.7630813799  
\C,-5.1463513856,2.3429962612,-2.8552146118\C,-4.3644109663,2.00251350  
76,-3.9608836085\H,-4.7643857562,2.1081346768,-4.9659694188\H,-2.43263  
56578,1.2090930431,-4.5844756065\H,-5.2525834306,2.445478253,-0.707063  
6821\H,-6.1571722891,2.7186021706,-2.99361331\H,-1.5627575095,0.975257  
0187,-2.3994176169\C,-2.0206556594,3.9165254405,-0.1821452265\C,-1.578  
2994729,2.7037070399,1.9305616556\C,-1.0320448481,-0.1748491758,0.6877

537137\C,-0.3305953585,-1.4252737015,1.1392574414\H,-0.3811192371,-1.6  
059361944,2.2191856526\H,-0.5683037772,-2.3290226814,0.5753664091\O,-1  
.3305999367,4.536944472,-0.9601871206\O,-3.2088198397,4.3586582534,0.2  
831331679\C,-3.6995033,5.5833728546,-0.297268261\C,-3.0942321783,6.798  
7834582,0.3875290207\H,-4.7814962397,5.5369190925,-0.1538256133\H,-3.4  
768986197,5.5773126427,-1.3668917994\H,-3.2762829026,6.7626481195,1.46  
58157714\H,-3.5417215368,7.716556424,-0.0095151678\H,-2.0171878529,6.8  
326517555,0.2101741912\O,-2.5246482797,2.6550429852,2.6888636401\O,-0.  
3161981005,2.9309556263,2.3543086207\C,-0.0775293645,2.7361199509,3.76  
70963424\C,0.1589240744,1.2602877608,4.0496127663\H,0.811803596,3.3311  
562309,3.9818017956\H,-0.9269699461,3.1296546098,4.3294003351\H,0.9526  
147217,0.8667448073,3.4088259195\H,-0.7455600878,0.6810430029,3.849473  
3668\H,0.4365006214,1.1218816873,5.1004488351\H,-2.331975568,-4.433410  
1252,-0.7326135893\H,-3.5657727999,-5.2292655381,-1.7172901782\H,-3.90  
83276738,-4.8407394202,-0.0165389655\C,-5.4689107577,-3.2079074033,-1.  
6388092476\H,-5.853557817,-2.2390635584,-1.9771457494\H,-6.0117952566,  
-3.5084285279,-0.7420437945\H,-5.6614900513,-3.9412109287,-2.431235257  
1\C,3.0546777594,2.7022671699,1.8606185066\C,3.5068562766,3.5626027559  
,2.8579923569\C,3.9574837112,1.8557829927,1.1934254159\C,5.3061481016,  
1.8667586617,1.5693379468\C,5.7492076123,2.7129309587,2.5890036251\C,4  
.8540726645,3.5679390625,3.2298594466\H,2.0024233769,2.6836097115,1.59  
78739035\H,2.8053720953,4.2317309123,3.3475216548\H,6.7978687993,2.707  
7701946,2.8733305915\H,5.201131659,4.2340145682,4.0146753389\H,6.01508  
54687,1.2206245446,1.0639077901\H,3.2665475355,0.7815438713,-0.1284431  
224\C,2.9376772503,1.9413115748,-1.4997431922\C,4.7540655295,-0.153372  
7983,-0.6898309869\C,3.4295399173,3.2541262743,-1.545118071\C,2.095679  
8576,1.480343157,-2.5205443552\C,1.7443793451,2.3160421863,-3.57901171  
15\C,3.0769236517,4.0888688269,-2.6057969936\C,2.2355461806,3.62181173  
5,-3.6195255056\H,4.0677013006,3.6250855202,-0.7492384931\H,1.67067191  
4,0.4840273802,-2.491911677\H,1.0616054621,1.9160292306,-4.321256201\H  
,1.9500549447,4.285000555,-4.431421788\H,3.4492437817,5.1095140057,-2.  
6328390947\C,5.6719453324,0.4958329226,-1.5268218326\C,5.0326194039,-1  
.4806734005,-0.2786297147\C,6.2375320772,-2.0824967565,-0.6914449536\C  
,7.1377969091,-1.4126757745,-1.5109521336\C,6.8510467542,-0.1182107708  
,-1.9402413095\H,6.4464005091,-3.0956474677,-0.3748283183\H,8.05281411  
38,-1.9075297053,-1.8216967274\H,7.5385873474,0.4127619784,-2.59190331  
7\H,5.4484066793,1.5039365438,-1.8580877182\C,4.1208232297,-2.34313541  
68,0.5032232756\O,4.6701102865,-3.5292943147,0.8909057426\C,3.67447769  
38,-4.1948392146,1.7036282715\N,2.8765371945,-2.1836220687,0.800272347  
2\C,2.3688954771,-3.4716013586,1.3232011354\H,3.9507980765,-4.05321270  
06,2.7552451623\H,3.6787242033,-5.2541686933,1.4485006503\Pd,1.5139329  
348,-0.5433328678,0.551202241\H,1.7478184912,-3.2708024953,2.199490740  
4\C,1.5547070352,-4.2292358335,0.2830248446\C,0.9823029528,-5.45603986  
29,0.6490667193\C,1.3489431146,-3.7390534487,-1.0057380154\C,0.2293822

361,-6.1808951731,-0.2717358565\H,1.115479996,-5.8387365541,1.65979557  
54\C,0.5714607414,-4.4482345726,-1.9265994595\H,1.7217166019,-2.766106  
1208,-1.2929058555\C,0.0239179809,-5.6766624367,-1.5609214191\H,-0.216  
4159571,-7.1273580076,0.0224394561\H,0.372065513,-3.9900895857,-2.8943  
938056\H,-0.5905017139,-6.2292599391,-2.2658522618\H,-0.0796775507,-0.  
6270746429,-1.7806124527\C,-0.1060158303,-1.1803178274,-3.6664997892\O  
, -0.2386139484,0.0413919983,-3.9445553727\O,-0.0464516264,-2.192439240  
8,-4.3748671267\O,0.0002561461,-1.4601073483,-2.2656275702\H,0.4652313  
947,2.772732303,0.1086143485\H,-0.353399723,2.1076208824,-1.2621534259  
\

## TS7

1\1\GINC-OMC-1-816\Freq\RB3LYP\GenECP\C60H63N1O9P1Pd1(1-)\SHIMGRP\28-N  
ov-2023\0\#p freq geneep b3lyp empiricaldispersion=gd3bj geom=check g  
uess=read\TS2\ -1,1\C,-3.9691781064,-2.2856037919,0.7624984491\C,-4.0  
09650855,-1.5850372762,-0.5389302812\C,-3.2887029031,-0.457777105,-0.7  
022707376\C,-3.321252892,-1.5793202333,1.9136020336\C,-2.6012126509,-0.  
.4672886946,1.6868645582\C,-2.3922531621,0.1651790488,0.3449105988\H,-  
3.1497171837,-0.074782554,-1.7026612816\H,-2.1102469955,0.0376655957,2.  
.5019333311\C,-4.7499682486,-2.2171406073,-1.7287964856\C,-3.477967115  
3,-2.1713710628,3.3216231842\O,-4.4337520545,-3.4245779421,0.914906621  
3\C,-4.8229919691,-1.2440192375,-2.922001157\C,-3.9646541434,-3.466248  
5352,-2.1884216441\H,-5.3336235859,-0.312942664,-2.646121034\H,-5.4018  
119895,-1.7179243053,-3.7236501827\H,-3.8296517236,-0.996673781,-3.313  
821082\C,-2.7507692616,-3.5323156832,3.395093359\H,-3.1612288175,-4.22  
27770857,2.6592681131\H,-2.8566377801,-3.9656508991,4.3976996162\H,-1.  
6835838591,-3.4007164885,3.188375051\C,-4.9761869334,-2.3584379847,3.6  
498696875\H,-5.4455002666,-3.0374056689,2.938816193\H,-5.4998468426,-1.  
.3964307732,3.613703587\H,-5.0908383584,-2.768353942,4.6606316255\C,-2.  
.8751101978,-1.2539541633,4.4000532538\H,-1.7936512653,-1.1360248926,4.  
.2781481514\H,-3.0488734042,-1.6929275378,5.3883814509\H,-3.330316102,  
-0.2579019531,4.3880068196\C,-2.5780018328,1.7400511105,0.4647540736\C  
, -0.1525048483,0.6874320854,-0.8960010432\C,-1.241866938,2.5670900054,  
0.400267257\C,-0.3665339512,2.1662548422,-0.8002320705\C,-3.5846324843  
,2.3286195981,-0.5198780205\H,-2.9921117819,1.9198157618,1.4578894481\  
C,-4.6909568169,3.0136970301,-0.0013426166\C,-3.4289474436,2.262608516  
8,-1.9160417982\C,-4.3664958463,2.8689920212,-2.7508815084\C,-5.623444  
1763,3.6252881788,-0.8398089874\C,-5.4612151684,3.5553656275,-2.222889  
231\H,-6.1861769882,4.0233711677,-2.8836439868\H,-4.2363411099,2.78740  
45588,-3.8256562536\H,-4.8178052577,3.0702165177,1.0765575425\H,-6.475  
4124027,4.1470700133,-0.4114871893\H,-2.6187862743,1.6988674781,-2.377  
832336\C,-1.6152403438,4.0533073451,0.2853659573\C,-0.3451984199,2.507  
7205141,1.6403450521\C,-1.0290035829,-0.2111666817,-0.2713013989\C,-0.  
5826061278,-1.549398541,-0.3045858712\H,-1.0529162053,-2.2852243292,0.

3383237618\H,-0.231633757,-1.9182944967,-1.2653920485\O,-1.4057412923,  
4.7724869652,-0.6613306451\O,-2.2369978403,4.4620249534,1.4207418701\C  
,-2.7152966494,5.8220156653,1.4204371299\C,-1.597217854,6.7972173796,1  
.7541196265\H,-3.502192713,5.8349651097,2.1787628472\H,-3.1540755798,6  
.0359345199,0.4428438732\H,-1.1328225282,6.5376453309,2.7101117753\H,-  
1.994241119,7.8159095363,1.8245469519\H,-0.8331903441,6.7728170807,0.9  
747063281\O,0.6563977556,3.1948276405,1.7331676682\O,-0.7494898707,1.6  
644403139,2.6010389333\C,0.1365187907,1.4491571332,3.7253393744\C,0.94  
13102282,0.1774572819,3.5145636801\H,0.7811935754,2.3228265899,3.83291  
40174\H,-0.5256541365,1.3712810708,4.5914166271\H,1.5211627975,0.23482  
30366,2.5884236106\H,0.28344169,-0.6922147792,3.4378431548\H,1.6304591  
418,0.0295836199,4.3532313024\H,-2.9766911642,-3.1655122581,-2.5584256  
462\H,-4.5054022235,-3.9572847102,-3.0084389904\H,-3.8613984961,-4.180  
8897876,-1.3689013486\C,-6.1919592556,-2.5918507662,-1.3228271414\H,-6  
.7419781227,-1.7038520035,-0.9868205292\H,-6.2045443106,-3.3326208928,  
-0.5231373626\H,-6.7207530061,-3.00142366,-2.1916812798\C,3.6148153553  
,2.1596569925,2.0516265042\C,4.3004942818,2.5938949601,3.1844039681\C,  
4.2183415456,1.2576558107,1.1592441286\C,5.5122674273,0.7934038211,1.4  
337390457\C,6.1877239418,1.218697927,2.5794737916\C,5.5862406025,2.120  
4168823,3.4571224145\H,2.6126317495,2.5273126659,1.8596461665\H,3.8229  
420349,3.3004578731,3.8576220391\H,7.1886837448,0.846708463,2.78055031  
66\H,6.1148134027,2.4523376018,4.3464263937\H,5.9962707824,0.101184317  
8,0.7543497771\H,3.2233810223,0.6570257119,-0.2683549902\C,3.087144952  
7,2.06897272,-1.4192754868\C,4.4310041016,-0.4504433569,-1.1142818465\  
C,3.5800446609,3.3463011215,-1.126591003\C,2.3770999413,1.8446047626,-  
2.6134795545\C,2.1658627897,2.9040722284,-3.4931451671\C,3.3569232064,  
4.3998939915,-2.0147871389\C,2.648139083,4.1809562673,-3.1963987717\H,  
4.1236028353,3.5230672037,-0.2049045697\H,1.9386611322,0.8749452507,-2  
.8527896793\H,1.5916030318,2.7240057955,-4.3964569182\H,2.460710136,5.  
0061976587,-3.8777194932\H,3.7302540203,5.3919019842,-1.7761318356\C,5  
.2896377119,0.0968911558,-2.075229692\C,4.5860818349,-1.8177866067,-0.  
7692385822\C,5.6026992538,-2.5702807987,-1.3900341232\C,6.4353361956,-  
2.0057468002,-2.3474435354\C,6.2766281832,-0.6646049366,-2.6967381269\  
H,5.7147359859,-3.6124647176,-1.1205912558\H,7.1995205185,-2.613522684  
3,-2.822146125\H,6.9166677818,-0.2100898661,-3.4469025489\H,5.17534319  
01,1.1413430588,-2.340007594\C,3.7279932001,-2.5448123589,0.1765573446  
\O,4.2186980339,-3.7566676282,0.5678524668\C,3.2867052579,-4.288105329  
7,1.5337418381\N,2.5518666324,-2.2460329265,0.625409799\C,2.0130271856  
,-3.4486851363,1.3047932824\H,3.7151414135,-4.1446808243,2.5327890878\  
H,3.1494453007,-5.3503824086,1.3312206483\Pd,1.2991115778,-0.561884716  
8,0.0766664286\H,1.5608391395,-3.1492466369,2.25375643\C,0.9678644289,  
-4.1425648529,0.4521530206\C,-0.0746047944,-4.831002666,1.081926373\C,  
0.9862004555,-4.0540669231,-0.9431655689\C,-1.0988578622,-5.4009217934  
,0.3257040122\H,-0.1072862512,-4.8859727161,2.1675475779\C,-0.05606363

54,-4.5875216687,-1.7011631152\H,1.74356139,-3.4614437092,-1.444149157  
4\C,-1.0956323806,-5.2671894167,-1.0639265173\H,-1.9242562594,-5.90013  
64899,0.8241066443\H,-0.1089782653,-4.3553426381,-2.7591245567\H,-1.92  
79172669,-5.6471587187,-1.6460205095\H,0.2425174627,0.2581703664,-1.94  
63214159\C,-0.8383151312,-0.9310155114,-3.3362391302\O,-1.7574658741,-  
0.031331708,-3.3303006142\O,-1.067404448,-2.17704594,-3.4480508414\O,0  
.4262556502,-0.5268426733,-3.1370869538\H,0.5776757193,2.7086031439,-0  
.7464344481\H,-0.8492211657,2.5096128265,-1.7179044704\

## Int8

1\1\GINC-OMC-1-812\Freq\RB3LYP\GenECP\C60H63N1O9P1Pd1(1-)\SHIMGRP\28-N  
ov-2023\0\#P Geom=AllCheck Guess=TChech SCRF=Check GenChk RB3LYP/GenE  
CP Freq\TS2\|-1,1\C,-4.0731372399,-2.2159325731,0.6995302509\C,-4.021  
9251904,-1.5413393419,-0.616302192\C,-3.2232732633,-0.4686548529,-0.77  
6358599\C,-3.3624062774,-1.5677324696,1.8491124365\C,-2.5498949137,-0.  
5222787075,1.6215663507\C,-2.3280570616,0.1282241747,0.2899084754\H,-3  
.0253879298,-0.110852039,-1.7783848814\H,-2.0099166603,-0.0668180525,2  
.4344353784\C,-4.7530948661,-2.1528919572,-1.8226767238\C,-3.576137748  
6,-2.1355011128,3.2600531782\O,-4.6539513773,-3.297521032,0.8634445611  
\C,-4.7199255646,-1.2030025469,-3.0365191402\C,-4.0193292781,-3.452823  
544,-2.229383809\H,-5.1915330227,-0.2410895166,-2.8007337421\H,-5.288  
604899,-1.6626080138,-3.8535531139\H,-3.700544951,-1.0145860041,-3.391  
1930848\C,-3.0200114033,-3.5736329909,3.3443860474\H,-3.5199282667,-4.  
2186769925,2.6231019335\H,-3.1673987258,-3.9771476745,4.3540091694\H,-  
1.9478059486,-3.5751708494,3.1263770295\C,-5.0853310565,-2.1369634235,  
3.5927138185\H,-5.6356747456,-2.7575578037,2.8861596371\H,-5.488433601  
4,-1.1186819647,3.5530030215\H,-5.2463039754,-2.5257768683,4.605446026  
7\C,-2.8617674947,-1.2916389597,4.3305383932\H,-1.7750445079,-1.300843  
8672,4.1974351665\H,-3.0760209375,-1.705974573,5.3214614389\H,-3.19821  
58932,-0.2494311813,4.3205470832\C,-2.5334816432,1.6993990114,0.445851  
9786\C,-0.1053464607,0.7158257757,-0.9353145487\C,-1.207144277,2.54142  
00938,0.4186790242\C,-0.3257623721,2.1892306511,-0.7885740637\C,-3.532  
7594092,2.296022634,-0.5416605166\H,-2.9644194927,1.8503130578,1.43643  
65299\C,-4.6512490535,2.962428232,-0.0249779971\C,-3.3615478454,2.2524  
10195,-1.936932285\C,-4.294949006,2.8636518581,-2.772856827\C,-5.58010  
05373,3.5781003246,-0.8643806276\C,-5.4018031636,3.5314290491,-2.24643  
10869\H,-6.1237593957,4.0028147781,-2.9079419071\H,-4.1521019261,2.799  
9639691,-3.8471635763\H,-4.7911525177,2.9999494033,1.0520702616\H,-6.4  
419952025,4.0845675058,-0.4377130653\H,-2.5418792238,1.7039259764,-2.3  
989212463\C,-1.5981594946,4.0267452098,0.3433239133\C,-0.3204942344,2.  
4611507895,1.6660978243\C,-0.9716892828,-0.2261839812,-0.339807774\C,-  
0.5521780961,-1.5599733347,-0.4177574823\H,-1.0702610066,-2.3115765653  
,0.1660893101\H,-0.1103681418,-1.8998096136,-1.3515166653\O,-1.3876123  
378,4.7750119566,-0.5800591196\O,-2.2373297726,4.3926815778,1.48261876

55\C,-2.7353316954,5.7456639657,1.5172576561\C,-1.6353404745,6.7260159  
138,1.8927012775\H,-3.5305840331,5.7242982441,2.2665193506\H,-3.166286  
6522,5.9820400158,0.5413924673\H,-1.1783353513,6.4450561299,2.84618774  
23\H,-2.0481710503,7.7362585166,1.9884474699\H,-0.8621233906,6.7361066  
654,1.1220705947\O,0.6818551901,3.1441495153,1.7745573148\O,-0.7408277  
558,1.6157327203,2.6174899561\C,0.1276872313,1.4032957237,3.7568648141  
\C,0.9651792124,0.1523601704,3.5487274572\H,0.7509188605,2.289214431,3  
.8881869821\H,-0.5511819935,1.3001143345,4.6069628001\H,1.5616617246,0  
.2316817314,2.6350423176\H,0.3294795295,-0.7318630778,3.4535753563\H,1  
.6414916844,0.0122762633,4.3990765667\H,-3.0026177789,-3.2062502505,-2  
.551395137\H,-4.5483288248,-3.9322770983,-3.0570193584\H,-3.9893287861  
, -4.1558341183,-1.3867174358\C,-6.2311181528,-2.4339537081,-1.47513494  
15\H,-6.7397229337,-1.5086342921,-1.1768805688\H,-6.3246939441,-3.1586  
385524,-0.6666240317\H,-6.7450037125,-2.8242099589,-2.3616314021\C,3.6  
547496253,2.1401336203,2.037092319\C,4.3684943672,2.5954921141,3.14435  
66834\C,4.2529866063,1.2596761228,1.1207687897\C,5.5704774898,0.836403  
558,1.3447657087\C,6.2746484423,1.28215444,2.4649259964\C,5.6780437749  
,2.1634371582,3.3666636474\H,2.6356997241,2.4768177614,1.8821314065\H,  
3.894568987,3.2857749486,3.8367843917\H,7.2936705212,0.9419000864,2.62  
77816107\H,6.2291215042,2.5113320985,4.2360341485\H,6.0485008669,0.160  
0195792,0.6455885638\P,3.2359956971,0.640832472,-0.2835816797\C,3.0786  
441748,2.0330968362,-1.4543582854\C,4.4113806318,-0.4946072592,-1.1237  
284476\C,3.5088995079,3.3318200542,-1.1569801906\C,2.395145576,1.77410  
77593,-2.6576111743\C,2.1456752429,2.8229468607,-3.540222369\C,3.25023  
43601,4.3729638157,-2.0503173152\C,2.5661845904,4.1207487454,-3.239942  
4557\H,4.0305622833,3.5344828684,-0.2279590153\H,1.995232503,0.7873965  
821,-2.9031899575\H,1.588451231,2.6146078241,-4.4481148613\H,2.3492907  
47,4.9361569303,-3.9244217968\H,3.5756075233,5.3810626274,-1.808920448  
8\C,5.257840796,0.0208432174,-2.1125659748\C,4.5720516718,-1.851761700  
5,-0.7294278776\C,5.5931375404,-2.6186846462,-1.3317881882\C,6.4148071  
152,-2.0841928201,-2.3130691526\C,6.2446807166,-0.7563454308,-2.713998  
0684\H,5.7135226847,-3.6502557005,-1.0274044448\H,7.18057382,-2.704120  
9487,-2.7694640955\H,6.8757629667,-0.326656556,-3.4858465736\H,5.13609  
91758,1.0548301147,-2.4128578437\C,3.7192868415,-2.5474618759,0.234118  
3406\O,4.1922495567,-3.7661757544,0.6349907816\C,3.2718557213,-4.26225  
01801,1.6267696842\N,2.5502918377,-2.2257980892,0.7012231415\C,2.00441  
38242,-3.4161089667,1.3954581398\H,3.7138650114,-4.0970226023,2.616938  
5168\H,3.121495179,-5.3283174056,1.4549722986\Pd,1.3029479507,-0.54818  
51642,0.1060061405\H,1.5583776982,-3.1057259203,2.3440055436\C,0.95054  
25343,-4.1117294864,0.555285975\C,-0.1293672672,-4.7322933786,1.191595  
8149\C,0.999470201,-4.0883873441,-0.8423939146\C,-1.1634718066,-5.2922  
025227,0.440516353\H,-0.1800690051,-4.7433305442,2.2778234637\C,-0.049  
3383349,-4.6127854655,-1.5972392445\H,1.7930253649,-3.5529920635,-1.35  
2052429\C,-1.1302067758,-5.2182707902,-0.9529634242\H,-2.0169577155,-5



.7360467199,0.9438566558\H,-0.0726842109,-4.4330079689,-2.6661104612\H  
,-1.9674986153,-5.5870263725,-1.5351126633\H,0.324253143,0.3698780544,  
-1.9071263015\C,-0.7295729397,-0.9487709981,-3.3669668821\O,-1.6101948  
081,-0.0031932203,-3.3908424648\O,-1.0656496602,-2.1854123274,-3.34635  
0206\O,0.5447763034,-0.6276321884,-3.2796182705\H,0.6184468571,2.72940  
82687,-0.7134526007\H,-0.8049215598,2.5629537914,-1.6957146418\

### Int8 - CO<sub>3</sub><sup>-</sup>

1\1\GINC-OMC-1-823\Freq\RB3LYP\GenECP\C59H63N1O6P1Pd1(1+)\SHIMGRP\23-N  
ov-2023\0\#P Geom=AllCheck Guess=TCheck SCRF=Check GenChk RB3LYP/GenE  
CP Freq\TS2\1,1\C,-3.8430569076,-1.9914584852,0.9285503153\C,-4.1504  
339166,-1.2941749075,-0.3535665449\C,-3.3513636771,-0.29459304,-0.7575  
257274\C,-2.6530886831,-1.5443243437,1.720819381\C,-1.865031214,-0.571  
3777731,1.2252647456\C,-2.1577074764,0.2394759263,-0.0121365259\H,-3.5  
580422236,0.2071784819,-1.6909387928\H,-0.9788805299,-0.2769737326,1.7  
690483951\C,-5.3736257659,-1.7326638427,-1.1689945994\C,-2.4377802765,  
-2.1528342286,3.11846824\O,-4.5356080355,-2.9316840694,1.3190025299\C,  
-5.5393733435,-0.8793367414,-2.4389703323\C,-5.2151346459,-3.208182139  
1,-1.5997531662\H,-5.6716227018,0.1825354088,-2.2067647146\H,-6.428721  
4287,-1.213349734,-2.9804795858\H,-4.6855496957,-0.9820490029,-3.11773  
54737\C,-2.3199338858,-3.6930432253,3.0975523562\H,-3.193444825,-4.155  
4248335,2.6421896147\H,-2.2261853228,-4.0605975367,4.1245255558\H,-1.4  
270170499,-4.0209681757,2.5555445852\C,-3.6531744839,-1.7484353576,3.9  
890413569\H,-4.5779786432,-2.1712979471,3.5963700583\H,-3.7487940726,-  
0.6587718633,4.0299712995\H,-3.5124969349,-2.1148241508,5.0111141052\C  
,-1.1773661598,-1.5879955427,3.7934367961\H,-0.2663973582,-1.818380679  
5,3.2276861644\H,-1.0670852165,-2.0384119511,4.7840605781\H,-1.2394216  
93,-0.5045253941,3.9196796835\C,-2.4747843734,1.7404197613,0.420363506  
6\C,-0.0143922667,1.2320612237,-1.1428754833\C,-1.1900633241,2.5806998  
033,0.7013347059\C,-0.1932762531,2.5649333838,-0.4680572825\C,-3.42032  
9854,2.4496170259,-0.5387317462\H,-2.9937331942,1.660268828,1.37471383  
29\C,-4.6741220581,2.8471454869,-0.0585597932\C,-3.1160538153,2.697364  
5296,-1.885363445\C,-4.0392399984,3.3220373175,-2.7231088408\C,-5.5993  
007922,3.4745772213,-0.8924310601\C,-5.2842882205,3.7142893129,-2.2300  
215733\H,-6.002333764,4.1994582932,-2.8832819536\H,-3.7856002026,3.499  
0262892,-3.7636440174\H,-4.9242471209,2.6592400042,0.9809586316\H,-6.5  
658969073,3.7714325497,-0.4975279562\H,-2.1683383813,2.3770280227,-2.3  
02483127\C,-1.6105937218,4.0610990653,0.9192971545\C,-0.5783448858,2.1  
710057767,2.0568906741\C,-0.9702522322,0.1774645665,-0.9892668252\C,-0  
.6643361122,-1.0479481924,-1.5785078418\H,-1.2696626231,-1.9181618835,  
-1.3636055223\H,-0.0492486806,-1.1062533001,-2.4721914191\O,-1.1554667  
28,4.9894901498,0.2894907968\O,-2.5254117354,4.1610778202,1.8865725471  
\C,-3.037153785,5.494162403,2.1638206571\C,-2.1060754414,6.2466065969,  
3.0971390589\H,-4.0115300871,5.31110944,2.6192324723\H,-3.1689369139,6

.016041614,1.2139069889\H,-1.9441938789,5.6813083995,4.019153763\H,-2.5477660615,7.2129824956,3.3587560601\H,-1.1435877201,6.4294612022,2.6138680284\O,-1.223746684,1.7549328407,2.9953481314\O,0.7400271434,2.4085183256,2.1013419624\C,1.3991481149,2.2053688736,3.381458459\C,1.7501600508,0.7456362615,3.608163001\H,2.2891319104,2.8279224034,3.3134920119\H,0.7415150142,2.579451871,4.1689079354\H,2.3002998792,0.342628256,2.7549170445\H,0.8535013575,0.1477333511,3.7640844357\H,2.3827891107,0.6569574023,4.4969959277\H,-4.3191487551,-3.3316852996,-2.2182908939\H,-6.0801422558,-3.5143684166,-2.1968497648\H,-5.1413444834,-3.8667647899,-0.7343282991\C,-6.6496057282,-1.5578019985,-0.3135563301\H,-6.7660297981,-0.5116910271,-0.0105688395\H,-6.6200664568,-2.1813283358,0.5792862672\H,-7.528622962,-1.8365941382,-0.9035312135\C,3.3356053626,3.1868205667,0.3766419847\C,3.6926686728,4.310490507,1.1181613813\C,3.7666422698,1.9088202793,0.7673082215\C,4.5553545425,1.7777818766,1.9192572935\C,4.9158746846,2.906011646,2.6566902677\C,4.48676792,4.1733126873,2.25902234\H,2.7405906875,3.3095047087,-0.521012624\H,3.3542233752,5.2914466792,0.8010703625\H,5.5340504242,2.7920655756,3.5414792684\H,4.7707221748,5.0494927243,2.8328598207\H,4.8967289314,0.8008219857,2.2405004781\H,3.2249177167,0.45727565,-0.2039794285\C,3.6787773351,0.8564302717,-1.9398991773\C,4.4799413999,-0.8263596593,0.2237707711\C,4.569611049,1.8816303724,-2.284568752\C,3.1412381549,0.0468016213,-2.9540314654\C,3.4847022792,0.2618982582,-4.2869088344\C,4.904293738,2.0995667824,-3.6219023681\C,4.3638349911,1.2934723366,-4.6238787313\H,4.9962294434,2.5173112094,-1.5172914265\H,2.4569247217,-0.7557421101,-2.6934568674\H,3.0642234256,-0.3716911345,-5.0615415299\H,4.6262008852,1.4671367614,-5.6624445884\H,5.5898826137,2.9009653574,-3.8782946576\C,5.8207896864,-0.4670640335,0.0236939783\C,4.1958372117,-2.1146268135,0.7366590937\C,5.266195243,-2.9724876277,1.0607386062\C,6.5863155516,-2.5878076592,0.8646578449\C,6.8673818827,-1.3298135019,0.3346803187\H,5.0456521783,-3.9541880016,1.4579885812\H,7.3892511011,-3.2718028847,1.1177648645\H,7.892955803,-1.0186160168,0.16516989\H,6.049130133,0.5123176276,-0.3807225703\C,2.8475735543,-2.6874030131,0.918485533\O,2.8183502636,-3.8590383102,1.5801325621\C,1.4299149032,-4.2626414746,1.711552662\N,1.7053390455,-2.2681968154,0.4803197819\C,0.6742109714,-3.2949067221,0.7723604967\H,1.145409412,-4.1439669241,2.7601509513\H,1.3547401771,-5.3090146006,1.4173503826\Pd,1.0746107949,-0.4257673407,-0.3064928374\H,-0.15083054,-2.8120193087,1.294703749\C,0.1364539497,-3.9357085624,-0.488570398\C,-1.2043234645,-4.3369247285,-0.5330635452\C,0.9508174729,-4.1347450129,-1.6080594783\C,-1.7257680935,-4.9232887475,-1.6864201522\H,-1.8487910303,-4.1760678771,0.3247172006\C,0.4269877249,-4.7152699052,-2.7635193722\H,1.9890925591,-3.8179586039,-1.5851808885\C,-0.9125565285,-5.1074019237,-2.8064044523\H,-2.7675476315,-5.2247835065,-1.7102037793\H,1.0646639274,-4.862911451,-3.6296932967\H,-1.3194115829,-5.5570364559,-3.706432752\H,0.486517522,1.2877189789,-2.1098294414\H,0.7610

613343,2.9562625471,-0.1236514891\H,-0.5484524876,3.2864388103,-1.2088  
759072\

## TS8

1\1\GINC-OMC-1-820\Freq\RB3LYP\GenECP\C59H63N1O6P1Pd1(1+)\SHIMGRP01-D  
ec-2023\0\#p freq genecp b3lyp empiricaldispersion=gd3bj geom=check g  
uess=read\TS2\1,1\C,3.5379200595,-3.0869938525,0.2409480386\C,3.9097  
405676,-2.1963875483,1.3791329543\C,3.3235520129,-0.9937952054,1.47627  
8079\C,2.5705328701,-2.5762421177,-0.7858467441\C,1.9656624596,-1.3908  
549133,-0.5805257681\C,2.3261405313,-0.4170400065,0.5146294605\H,3.575  
2167232,-0.3380485512,2.2976260407\H,1.2451181566,-1.0308840264,-1.303  
6538688\C,4.9561771984,-2.676959955,2.3927741788\C,2.3758393787,-3.415  
2531203,-2.0607103899\O,4.0142499514,-4.2171939946,0.1454064213\C,5.22  
92638409,-1.6108551382,3.4684982119\C,4.455958538,-3.9562070042,3.1007  
34481\H,5.6014649376,-0.6759395674,3.0371275744\H,5.9911892978,-1.9853  
191912,4.1577865996\H,4.3354782182,-1.3856811531,4.0606358009\C,1.7962  
402373,-4.8106722074,-1.7405307006\H,2.4425233573,-5.358448902,-1.0569  
380033\H,1.7026888287,-5.3863285743,-2.6675895354\H,0.7989352341,-4.73  
01500009,-1.298766302\C,3.7536729118,-3.5602581472,-2.7537687647\H,4.4  
574342423,-4.1116348044,-2.1318902709\H,4.1725830461,-2.5743732633,-2.  
9806527071\H,3.6306879381,-4.1008099126,-3.6979224802\C,1.4439806719,-  
2.7256213641,-3.0724227179\H,0.431195841,-2.6025291633,-2.6800044111\H  
,1.3661984198,-3.3524764852,-3.9655832407\H,1.8331772172,-1.7512009253  
, -3.3744006977\C,3.0379980771,0.8230476721,-0.1987579051\C,0.338851495  
,1.215724096,0.7780703825\C,2.057793483,1.6751528384,-1.073237634\C,0.  
6554873142,1.7969054909,-0.4686600981\C,3.8481041819,1.6475651901,0.79  
01231161\H,3.7435755898,0.37827229,-0.8999087731\C,5.2438264271,1.5231  
54826,0.764708796\C,3.2702809265,2.4868603972,1.7511007006\C,4.0691924  
643,3.1770409231,2.6644992541\C,6.0435277768,2.2082837531,1.6769978634  
\C,5.4560875576,3.0376518294,2.6346372008\H,6.0747371148,3.5728398232,  
3.3479129394\H,3.60306822,3.8252809588,3.4000458126\H,5.7026541861,0.8  
7497836,0.0240379427\H,7.1225372091,2.0956569106,1.6394719519\H,2.1969  
616924,2.6239160419,1.7885421814\C,2.5972863719,3.1328899372,-1.149572  
9769\C,2.0560241275,1.2044534744,-2.5403882535\C,1.1100262323,0.081955  
7725,1.3142155424\C,0.7587378449,-0.4450308481,2.4984682604\H,1.305821  
0775,-1.2663517185,2.946079727\H,-0.0928728309,-0.0529959217,3.0474630  
525\O,2.0167898026,4.1058958534,-0.7226010249\O,3.7865718093,3.1350289  
331,-1.7490714607\C,4.4973142716,4.4064683661,-1.7960214124\C,4.039368  
8396,5.2385977726,-2.9791805896\H,5.5451045713,4.1145763865,-1.8768530  
736\H,4.3335425857,4.9198503578,-0.846578481\H,4.1646175133,4.68504561  
92,-3.9138902247\H,4.6383928094,6.1523817636,-3.0390539944\H,2.9903435  
972,5.5219498639,-2.8678740572\O,2.7676354947,0.3459381456,-3.00565763  
67\O,1.1614456129,1.9256537708,-3.2392834186\C,0.9654927707,1.57316069  
73,-4.6347204235\C,-0.1227105586,0.5196197461,-4.7617418411\H,0.678814

3312,2.5112705853,-5.1121135842\H,1.9155986468,1.2255369284,-5.0436532  
947\H,-1.0458350282,0.8594966727,-4.2824025093\H,0.1940131596,-0.41784  
72179,-4.2980360615\H,-0.3270544453,0.325541462,-5.8192020386\H,3.5170  
976557,-3.7608190915,3.6315494393\H,5.195419241,-4.2816855268,3.839691  
1616\H,4.2951012944,-4.7656059341,2.3896999944\C,6.2872071619,-2.96074  
1829,1.6591399918\H,6.6515867406,-2.0557923608,1.1606230993\H,6.171909  
3876,-3.7486452417,0.9155950329\H,7.0467035779,-3.2741688116,2.3826458  
037\C,-3.017460935,1.6768540963,3.665001861\C,-2.7178128455,2.60836539  
82,4.6617820072\C,-2.7596542189,1.9825061556,2.3232069271\C,-2.2004717  
222,3.2296598813,1.9912298204\C,-1.9127191395,4.15793944,2.988459723\C  
,-2.1670763364,3.8452674535,4.3272218745\H,-3.4509000971,0.7191785925,  
3.9305919983\H,-2.920323547,2.3657484619,5.70006994\H,-1.4862259382,5.  
1199118862,2.7228221822\H,-1.9361863633,4.5655590506,5.105362126\H,-1.  
9994442807,3.4747639546,0.9512489339\H,-3.0255818694,0.776352207,0.980  
5908661\C,-3.785706798,-0.6752364225,1.76813136\C,-4.3662399516,1.5194  
644532,-0.0436663034\C,-5.1746897711,-0.8347800051,1.8682266014\C,-2.9  
28971723,-1.6145442158,2.3591230809\C,-3.4603963446,-2.684919432,3.074  
5356657\C,-5.6989856804,-1.9220605957,2.5661459782\C,-4.8437103516,-2.  
8400016183,3.1784083649\H,-5.8417514897,-0.1114560996,1.4118679739\H,-  
1.8542831872,-1.5108876734,2.2512193173\H,-2.7947901009,-3.4072442584,  
3.5346083708\H,-5.2551686878,-3.6791682411,3.7303033744\H,-6.774678089  
8,-2.0461151888,2.6402605885\C,-5.1684208485,2.5336332146,0.4878259625  
\C,-4.6464217979,1.0550277815,-1.3529760164\C,-5.7118449412,1.60300892  
39,-2.0792102181\C,-6.4882722471,2.6245911969,-1.5367504585\C,-6.21532  
0989,3.0890352618,-0.2524010554\H,-5.921870876,1.2216686869,-3.0716922  
768\H,-7.3029939947,3.0489052489,-2.1135080822\H,-6.8184836625,3.87916  
45583,0.1829442678\H,-4.9767177094,2.8932442964,1.4919525913\C,-3.8871  
050244,-0.0374201236,-1.9758762937\O,-4.5553261164,-0.8170602768,-2.84  
65387807\C,-3.5722947796,-1.7390374128,-3.4095699756\N,-2.6557966164,-  
0.366054132,-1.765440547\C,-2.4284269408,-1.7010003881,-2.3883074707\H  
,-3.2693665676,-1.3448862436,-4.3835268376\H,-4.050147908,-2.708925265  
2,-3.5300987576\Pd,-1.2180372639,0.5151738524,-0.5161547648\H,-1.45553  
75313,-1.6945157632,-2.8803850358\C,-2.4601987668,-2.7601957264,-1.299  
3553513\C,-1.2949348233,-3.0230076745,-0.5708815951\C,-3.6362430938,-3  
.4414980324,-0.9629495399\C,-1.2842571328,-3.9905031324,0.432419109\H,  
-0.3830956908,-2.4833447206,-0.7897479319\C,-3.6276189117,-4.408913789  
3,0.0415261151\H,-4.5663009542,-3.2275208189,-1.4796871071\C,-2.448423  
9185,-4.6985017569,0.7288714487\H,-0.3616364882,-4.1954532137,0.966273  
4801\H,-4.5436786886,-4.9369720334,0.28491516\H,-2.4412646951,-5.46491  
30375,1.4972147632\H,-0.215507884,1.8095190669,1.4969895146\H,-0.10366  
96717,0.7142873959,-1.6297444159\H,0.1912169337,2.7487568645,-0.700236  
2506\

Int9

I\1\GINC-OMC-1-822\Freq\RB3LYP\GenECP\C59H63N1O6P1Pd1(1+)\SHIMGRP\30-Nov-2023\0\#P Geom=AllCheck Guess=TCheck SCRF=Check GenChk RB3LYP/GenECP Freq\TS2\1,1\C,-4.8935420375,-1.8808212442,0.7087610159\C,-5.1103110917,-1.0332443892,-0.5050764567\C,-4.0995408222,-0.2761501228,-0.9603805842\C,-3.5380620588,-1.8806006406,1.3370914774\C,-2.5850185445,-1.0762785807,0.8412987009\C,-2.7427723188,-0.1435417086,-0.3270440677\H,-4.2346963955,0.3203528631,-1.8514436183\H,-1.6160665486,-1.0594901949,1.3126672851\C,-6.4845109946,-1.0476397498,-1.1871160621\C,-3.2837648571,-2.7832750125,2.5518938451\O,-5.8033408948,-2.5694611783,1.1703053872\C,-6.5116016068,-0.1310274435,-2.4230069126\C,-6.8342116198,-2.4810919013,-1.6454808487\H,-6.2981561503,0.9119144179,-2.1672685519\H,-7.5084801862,-0.1650617648,-2.871473032\H,-5.7969612181,-0.4524919271,-3.1885822185\C,-3.5351499868,-4.2587336574,2.169434073\H,-4.5696091815,-4.4165958525,1.8667120062\H,-3.3185982695,-4.9078786979,3.0243613396\H,-2.8822522374,-4.5614013188,1.3418279982\C,-4.2167891413,-2.3672665239,3.7121854872\H,-5.2638994216,-2.4805622131,3.4344239698\H,-4.0351731584,-1.3242126013,3.9916205796\H,-4.0187354733,-2.9926850033,4.5892287214\C,-1.833482929,-2.6583056646,3.0543659647\H,-1.111377723,-2.9489493617,2.2825893495\H,-1.6914336884,-3.3244518731,3.9104918951\H,-1.6012817811,-1.6386258803,3.3755381818\C,-2.600755363,1.3612986452,0.1840196868\C,-0.3981816701,0.2453542339,-1.3433879939\C,-1.1346067385,1.7953891849,0.5245037616\C,-0.1135187995,1.2919736484,-0.4816734251\C,-3.2704178892,2.3420309634,-0.7668946275\H,-3.1499234794,1.3946407538,1.1246737873\C,-4.4929853892,2.9105081399,-0.3871870816\C,-2.7432494842,2.6670462238,-2.0232530631\C,-3.4271940199,3.5314548947,-2.8790182823\C,-5.1794529363,3.7727484308,-1.2402697136\C,-4.6482888673,4.084008197,-2.4933907362\H,-5.1806463056,4.7529774975,-3.1619476098\H,-3.0034329891,3.771876499,-3.8491196356\H,-4.9116745387,2.6629302477,0.5836878298\H,-6.1273417886,4.1994199251,-0.9274496863\H,-1.7954964378,2.2518512857,-2.3442064232\C,-1.0648344504,3.3451834861,0.528561982\C,-0.750312887,1.4198128709,1.9717520784\C,-1.6691392076,-0.4748323244,-1.3768654462\C,-1.8714966413,-1.3803445903,-2.3461877008\H,-2.8145005563,-1.9053089036,-2.4447035793\H,-1.0851980531,-1.6311501607,-3.0497902758\O,-0.3490975342,4.0105646516,-0.1865457883\O,-1.8962859859,3.8274629803,1.4552931734\C,-1.9898175478,5.2753719268,1.5617445412\C,-0.8823326406,5.8190102015,2.4460273832\H,-2.9782269063,5.4450271474,1.9905340776\H,-1.9509337129,5.6948997969,0.5547648317\H,-0.9129800715,5.3543928051,3.4355264531\H,-1.0039401625,6.8992851619,2.5700597023\H,0.0953915166,5.6328266618,1.9948835815\O,-1.4696860981,0.8868849948,2.7814081337\O,0.5059684532,1.8438115073,2.2342647983\C,0.9856385012,1.6433909016,3.5927416872\C,1.5793957063,0.2573149627,3.7658460424\H,1.7351052523,2.4252615248,3.7271570697\H,0.1526628494,1.8114005649,4.2775387493\H,2.4162722586,0.106655983,3.0804836137\H,0.8254606308,-0.5115108678,3.5821959655\H,1.9478330627,0.1425750935,4.7902524033\H,-6.0878538934,-2.85127388

52,-2.3577275752\H,-7.8054853874,-2.4801964553,-2.1508066216\H,-6.8833  
677669,-3.167305364,-0.8008496539\C,-7.5501594324,-0.5317601293,-0.192  
3942085\H,-7.3127252438,0.4886999943,0.1278852598\H,-7.6135967647,-1.1  
706702469,0.687722461\H,-8.5301257417,-0.5112811528,-0.6804022956\C,4.  
2891505058,2.7361740459,-2.0025047805\C,4.3937832495,4.0953110032,-2.2  
954546674\C,3.4728404948,2.3127800325,-0.9432782202\C,2.7678095887,3.2  
586541792,-0.1811241442\C,2.87608813,4.614478656,-0.4827100965\C,3.687  
4354595,5.0330528477,-1.5386019818\H,4.836417559,2.0089078295,-2.59247  
78698\H,5.0247025723,4.4215691273,-3.1160805311\H,2.3061001197,5.33661  
13397,0.0912518189\H,3.7640424421,6.0889542081,-1.777630076\H,2.126760  
3496,2.9376566361,0.6334371677\P,3.2857533148,0.5600909746,-0.50390702  
76\C,3.9575389839,-0.4053288545,-1.9014849577\C,4.4726102629,0.2838228  
065,0.870681299\C,5.092303906,-1.2182180305,-1.7918640451\C,3.22807469  
58,-0.3984590774,-3.1015243554\C,3.6291979942,-1.1902497276,-4.1739962  
81\C,5.4810210402,-2.0253117194,-2.8635976434\C,4.7515355354,-2.014654  
3797,-4.0527628885\H,5.6743625616,-1.2247354122,-0.8771223026\H,2.3496  
203,0.2331328197,-3.1979793818\H,3.0639739667,-1.1707223367,-5.1003830  
26\H,5.0587649537,-2.640137252,-4.884642894\H,6.3600739629,-2.65496181  
5,-2.7698364341\C,5.4005216728,1.2755485356,1.2016648696\C,4.489006220  
6,-0.9292823795,1.6011633995\C,5.4353987145,-1.1202104193,2.6183133507  
\C,6.3403798376,-0.1124996284,2.9431314509\C,6.3205482527,1.0868171332  
,2.2352839711\H,5.44746579,-2.0605425322,3.156235557\H,7.0574814882,-0  
.2686931088,3.7417898281\H,7.0254263732,1.8759864222,2.4760217423\H,5.  
4066308174,2.2042218149,0.6434238526\C,3.5561348855,-2.0392193133,1.34  
32623561\O,4.012234761,-3.2637609568,1.6452720435\C,2.9916174298,-4.22  
67891398,1.249474605\N,2.3428724933,-1.9826998181,0.9011479752\C,1.773  
1825298,-3.3553293216,0.8628283094\H,2.8092140102,-4.8887974063,2.0957  
790748\H,3.3875674023,-4.7966797199,0.4064114445\Pd,1.186719303,-0.418  
4298273,0.1564132037\H,0.9963714333,-3.3986713635,1.6317779237\C,1.158  
7994355,-3.6785860094,-0.4775374231\C,-0.1468003444,-4.1705743498,-0.5  
461935617\C,1.8881061582,-3.4855953514,-1.6579454059\C,-0.7166512351,-  
4.4859312264,-1.7804074562\H,-0.7209144841,-4.3057819559,0.365255159\C  
,1.3160344698,-3.7933908271,-2.8908480345\H,2.8970434342,-3.0865781275  
, -1.6192274127\C,0.0155088524,-4.3012079514,-2.9538915746\H,-1.7295846  
163,-4.8731843248,-1.8220656169\H,1.8896155089,-3.639381625,-3.7988043  
686\H,-0.4253874451,-4.549693125,-3.9142882291\H,0.2380260142,0.102464  
5394,-2.2139141604\H,-0.0201149793,-1.2170084864,0.6800134171\H,0.6347  
423546,2.0192872666,-0.7664775266\

### Int5

1\1\GINC-OMC-1-815\Freq\RB3LYP\GenECP\C60H63N1O9P1Pd1(1-)\SHIMGRP\07-D  
ec-2023\0\#P Geom=AllCheck Guess=TCHECK SCRF=Check GenChk RB3LYP/GenE  
CP Freq\TS2\1,1\C,-1.5605868901,1.2508360877,-3.483309021\C,-2.1168  
563379,2.3486483546,-2.6465590102\C,-2.636563681,2.0442588525,-1.43963

24222\C,-1.7692725357,-0.1516578647,-3.0317079477\C,-2.291388442,-0.37  
34636424,-1.8071689048\C,-2.5506903976,0.7000951142,-0.8123696252\H,-3  
.0222508218,2.82561359,-0.7935682275\H,-2.3753560935,-1.3876165166,-1.  
4486619577\C,-2.028502272,3.7888874229,-3.1672754621\C,-1.3241475696,-  
1.2983511855,-3.9495330222\O,-0.9546357172,1.496083316,-4.5386608964\C  
,-2.7126425981,4.7799192076,-2.210350943\C,-0.54057262,4.192525152,-3.  
2875338747\H,-3.7722053025,4.5407782964,-2.0670770481\H,-2.6505141904,  
5.7898445837,-2.629408045\H,-2.2278233165,4.7985970463,-1.2289383074\C  
,0.2144438343,-1.2621032409,-4.1048590622\H,0.5342767502,-0.3073681067  
,-4.5223133738\H,0.5448100799,-2.0710641494,-4.7679345645\H,0.69833119  
51,-1.4046786258,-3.1347431755\C,-2.0017902664,-1.1692175225,-5.331566  
1876\H,-1.7250244501,-0.232241874,-5.8134604355\H,-3.0928170273,-1.201  
3197563,-5.2281234865\H,-1.698804936,-2.0032443614,-5.9758702746\C,-1.  
7083812249,-2.6690371132,-3.3661734288\H,-1.2192623468,-2.8532013623,-  
2.4066143638\H,-1.3883831244,-3.4585151916,-4.0542228218\H,-2.79208702  
79,-2.7624552684,-3.2302610369\C,-3.7385206575,0.4900009968,0.17289242  
39\C,-1.148813369,0.428121847,1.344524034\C,-3.4512459178,-0.607693766  
4,1.2703052099\C,-2.2701415138,-0.1011359135,2.1726879736\C,-4.6386921  
807,-0.8223527872,2.1994777826\C,-3.0931674972,-1.9928638001,0.7170182  
361\C,-1.2380149667,0.7482738166,0.0515237401\C,0.1333898258,0.9908439  
027,-0.4705866974\H,0.4048395312,0.4328321402,-1.3692285019\H,0.413797  
1897,2.04108646,-0.5853963546\O,-4.9679049397,-1.8949018318,2.66582082  
63\O,-5.2293511906,0.3444686496,2.5405149595\C,-6.3370613425,0.2492941  
189,3.4611263958\C,-7.6109288624,-0.1872812762,2.7532828522\H,-6.43005  
97784,1.2564462069,3.8743740902\H,-6.0713486818,-0.4476024804,4.259944  
9838\H,-7.8369686044,0.4771806498,1.9158306605\H,-8.4510472388,-0.1710  
776703,3.4563229527\H,-7.4979288828,-1.2029626782,2.3692305152\O,-2.04  
96559442,-2.5806158833,0.8928294125\O,-4.1157644983,-2.5017418594,-0.0  
058160414\C,-3.9734477246,-3.8653461089,-0.4506778575\C,-4.3201440866,  
-4.8310519411,0.6711713507\H,-4.6687265357,-3.9500083526,-1.2896952816  
\H,-2.9538269055,-4.0206095203,-0.8108515386\H,-5.3162543805,-4.614889  
5537,1.0655260157\H,-3.5994421754,-4.7360426518,1.4856486913\H,-4.2982  
819914,-5.8615412848,0.3001869055\H,-0.0461468435,4.1236200579,-2.3133  
949593\H,-0.4589708248,5.2274611249,-3.6432370135\H,-0.0179458812,3.53  
53489212,-3.9816106004\C,-2.7218856456,3.9045152811,-4.5427271679\H,-3  
.7814713868,3.6364381133,-4.461527905\H,-2.2493180402,3.2455558852,-5.  
2705431866\H,-2.6610254373,4.9367874802,-4.9081292522\C,3.6214699696,-  
2.4442280999,-1.4692581154\C,3.3603791556,-3.6541168162,-2.1117895891\  
C,2.6349435547,-1.8227717101,-0.6885970872\C,1.3944576367,-2.458302174  
6,-0.5286645073\C,1.1432379956,-3.6807538746,-1.15348461\C,2.117961847  
4,-4.2742731959,-1.9558700215\H,4.5998202067,-1.9820732123,-1.56557818  
42\H,4.1293708856,-4.1191613618,-2.722961518\H,0.1838954985,-4.1656592  
228,-1.0005127971\H,1.9178117151,-5.2221391819,-2.448423743\H,0.640788  
7416,-2.0024052113,0.1067585244\O,2.9217015957,-0.2453756389,0.2321290

893\C,4.6111634313,-0.5632501282,0.888426588\C,3.1616088767,1.02214723  
64,-1.1026896895\C,5.7635821683,0.0040324788,0.3319301474\C,4.72571473  
08,-1.3737462301,2.026453695\C,5.9761745679,-1.601130068,2.6008913108\  
C,7.0133778547,-0.227618492,0.9081160456\C,7.1231378729,-1.0286610638,  
2.0466830133\H,5.6789444508,0.646318516,-0.5388791312\H,3.8322032265,-  
1.8110993755,2.4604839269\H,6.0501088151,-2.2158907133,3.4934163919\H,  
8.0950901047,-1.2012841728,2.5010802888\H,7.9000371523,0.2254490073,0.  
4722280094\C,3.1118055255,0.6804686715,-2.4594529489\C,3.1256157969,2.  
4025797118,-0.7714031697\C,3.0350246348,3.3751571031,-1.772398678\C,2.  
991632187,3.0069715476,-3.1143171909\C,3.0298177584,1.6559333219,-3.45  
45329242\H,2.9779637359,4.4183223512,-1.4807079111\H,2.9043247419,3.76  
65073702,-3.8848143458\H,2.9689259486,1.3528797263,-4.4954367488\H,3.0  
943689408,-0.3630694427,-2.7469552405\C,3.0924289369,2.79920263,0.6391  
96775\O,2.4456529177,3.9583252712,0.969927241\C,2.4994209111,4.0340612  
421,2.420821274\N,3.5535941365,2.0811028395,1.5849204745\C,3.142370215  
9,2.6818666392,2.855563046\H,1.4787402418,4.1651220135,2.7832706579\H,  
3.1103372892,4.900156357,2.6970594406\Pd,0.9039644289,0.2670813101,1.3  
29064018\H,2.3876576393,2.0085890331,3.2878606817\C,4.2953005845,2.795  
0677801,3.8301498968\C,4.1974672699,3.6184412878,4.9578237196\C,5.4599  
745766,2.0429999858,3.6393521382\C,5.2469968961,3.6990084448,5.8735481  
398\H,3.2905441874,4.1933190892,5.129904543\C,6.507041003,2.1205813021  
,4.5565392581\H,5.5334526941,1.4004888756,2.7716054688\C,6.408116698,2  
.9501411234,5.6748009427\H,5.1550013763,4.3427834211,6.7443184156\H,7.  
4004917093,1.5241671483,4.392787677\H,7.2248920649,3.0090324517,6.3891  
868954\H,-1.9261367768,-0.9283917632,2.7981153526\H,-2.6591446514,0.67  
11258086,2.8477385209\H,-3.750915675,1.4066635443,0.7690890317\C,-5.08  
19695191,0.45996325,-0.542179493\C,-6.0451234438,1.4163865983,-0.18864  
17805\C,-5.3851041327,-0.4074893563,-1.6009365208\C,-7.2727946773,1.49  
5010023,-0.8453734858\H,-5.8235906386,2.1053427244,0.6200466145\C,-6.6  
111418351,-0.3340594113,-2.2611008798\H,-4.6578537345,-1.1397422739,-1  
.9186265318\C,-7.5643132689,0.6127302116,-1.8855355101\H,-7.9957369216  
,2.2503219997,-0.5486922551\H,-6.8172836614,-1.0182919334,-3.079649098  
6\H,-8.5174208987,0.6689884524,-2.4040432428\O,1.3124840194,-0.1669112  
214,3.3935595773\C,1.5778685996,-1.3237517892,3.8512181294\O,1.6585507  
342,-2.3147601904,2.8472169703\O,1.7805166889,-1.6803881899,5.01151577  
44\H,1.8322099501,-3.1254443684,3.3467085265\

## TS5

1\1\GINC-OMC-1-815\Freq\RB3LYP\GenECP\C60H63N1O9P1Pd1(1-)\SHIMGRP\19-D  
ec-2023\0\#p freq genecp b3lyp empiricaldispersion=gd3bj geom=check g  
uess=read\TS2\1,1\C,3.9313491387,-2.8066832947,0.6134458911\C,2.629  
4389512,-2.4697521231,1.2534075502\C,1.8409862004,-1.5445539941,0.6771  
550441\C,4.2616299953,-2.1763711595,-0.6967554398\C,3.4506523324,-1.21  
81160781,-1.1856620907\C,2.1821359346,-0.7608871906,-0.546089823\H,0.8



955798783,-1.2651644208,1.1293328472\H,3.6708737903,-0.7583087668,-2.1  
386330842\C,2.2582491288,-3.1499656126,2.5767417727\C,5.5417974998,-2.  
6070148111,-1.4261254612\O,4.7193085372,-3.5977868895,1.1501230001\C,0  
.8917184264,-2.6718656112,3.0881544837\C,2.1909392308,-4.6803959652,2.  
3820743849\H,0.8868152181,-1.5967050687,3.2884741131\H,0.6558493437,-3  
.1826283196,4.0265809194\H,0.0816778751,-2.8904770966,2.3859091309\C,5  
.5429187503,-4.1359585512,-1.6493340225\H,5.514023627,-4.671663665,-0.  
7013600019\H,6.4464655802,-4.4305448563,-2.1959606385\H,4.6755228446,-  
4.4339607543,-2.2485721809\C,6.7690801743,-2.1978833533,-0.5799248785\  
H,6.7321527672,-2.6613676157,0.4060521172\H,6.80320139,-1.1090270901,-  
0.4569460023\H,7.6930048502,-2.5072715792,-1.0829130885\C,5.663326427,  
-1.9348256228,-2.8048245409\H,4.8271957426,-2.2012886413,-3.4593483876  
\H,6.58686829,-2.2702894305,-3.2882149646\H,5.6978026626,-0.8437843372  
, -2.7405034851\C,2.194397825,0.7523444594,-0.0737585914\C,0.7356577736  
,0.1568762975,-2.4634459562\C,2.4681124619,1.7424589382,-1.2456551578\  
C,1.3877034091,1.5074755748,-2.3594009406\C,2.284974083,3.2005849643,-  
0.8263884689\C,3.8780583007,1.6811132149,-1.8557968781\C,1.0794269309,  
-0.9051773466,-1.6322217914\C,0.1973995654,-2.0391203574,-1.5718024503  
\H,-0.239540898,-2.4077848588,-2.497947036\H,0.4057651748,-2.806057602  
6,-0.8320920265\O,2.9399448209,4.1205794255,-1.2749990586\O,1.23896972  
39,3.3736216783,0.0073275947\C,0.8942551865,4.7462555114,0.3081545432\  
C,1.7278270988,5.2617096162,1.4699719863\H,-0.1715952726,4.7185385894,  
0.5401493976\H,1.0479465583,5.3490021133,-0.5886901137\H,1.6361184993,  
4.6038689744,2.3393208927\H,1.3954951291,6.2657409048,1.7544233954\H,2.  
7809819836,5.3094576197,1.1840704966\O,4.1369447189,1.3925115607,-3.0  
057526212\O,4.8149835433,2.015018385,-0.9516416295\C,6.1669897707,2.15  
74089938,-1.4287318737\C,6.363386554,3.5238962602,-2.0655519315\H,6.78  
18524155,2.0323108266,-0.5339016236\H,6.3873690339,1.3528147202,-2.134  
2825495\H,6.0736417752,4.3139033965,-1.368399446\H,5.746009351,3.61355  
10971,-2.9614548787\H,7.4136602172,3.6606403806,-2.3451376953\H,1.4254  
452709,-4.9386518767,1.6411874939\H,1.9210189332,-5.1662027588,3.32721  
76016\H,3.1502074872,-5.0748015922,2.0466868548\C,3.3090856284,-2.7947  
422478,3.654361796\H,3.3568688721,-1.7107259118,3.7962445122\H,4.29780  
53156,-3.1539632218,3.3708315758\H,3.0262009539,-3.2534466385,4.609700  
3599\C,-4.4933440354,-3.1102386435,-1.5763662499\C,-4.7343030609,-4.32  
79886181,-2.2171838333\C,-3.3124745897,-2.9080133115,-0.850180572\C,-2  
.3766925145,-3.9551010848,-0.7893348795\C,-2.6248594519,-5.1745181295,  
-1.4128835093\C,-3.8067019827,-5.3647086949,-2.1343372515\H,-5.2236387  
808,-2.312968436,-1.6469231318\H,-5.6527107327,-4.4618696078,-2.781927  
6707\H,-1.8906210115,-5.9724393696,-1.345620063\H,-3.9967973502,-6.311  
5388019,-2.6318154794\H,-1.4502370313,-3.8099920883,-0.2453785725\P,-2  
.8793325569,-1.2615992448,-0.1279720655\C,-4.4957896905,-0.390731312,-  
0.1585153893\C,-2.6695996069,-1.6684662357,1.6833156812\C,-5.571298271  
8,-0.8443760745,0.6163730598\C,-4.6421602548,0.7476493899,-0.960580954

9\C,-5.8640694883,1.4199137693,-0.9852837089\C,-6.7894065066,-0.165714  
0613,0.5879848289\C,-6.9353468487,0.9690868597,-0.2134774542\H,-5.4557  
911917,-1.7219626346,1.2460821931\H,-3.7889704742,1.1360518952,-1.5080  
43439\H,-5.9564791383,2.3177560954,-1.5864574518\H,-7.8801412809,1.506  
2011761,-0.2266481472\H,-7.6189092294,-0.5179959747,1.1957440301\C,-2.  
9742346794,-2.9463155717,2.1718064881\C,-2.1819238495,-0.7147178115,2.  
6159306889\C,-1.9784638517,-1.0667627598,3.9554997651\C,-2.2782035968,  
-2.3475873935,4.408662827\C,-2.7867851882,-3.285005773,3.513030372\H,-  
1.5898826715,-0.3138744051,4.6318766343\H,-2.1167962221,-2.6086551438,  
5.4501074444\H,-3.0356212174,-4.2871302655,3.8502983739\H,-3.363053674  
7,-3.6956185137,1.4942610307\C,-1.9495090057,0.6713167738,2.2064149726  
\O,-1.2130831914,1.4903921551,3.0292706456\C,-1.2588774188,2.802892223  
,2.3982348725\N,-2.4115245311,1.166592078,1.1329968853\C,-1.9834218048  
,2.5689574076,1.039434649\H,-0.2317222002,3.1464929134,2.2791584972\H,  
-1.7952209902,3.4826913882,3.0659527495\Pd,-1.0678544722,-0.374888388,  
-1.23906891\H,-1.3011713086,2.6244980558,0.1883169581\C,-3.1710912586,  
3.4707738114,0.7618197717\C,-3.3698011402,3.9740113362,-0.5291597543\C  
, -4.1186094299,3.7393493154,1.7567177529\C,-4.4892794429,4.7628450782,  
-0.8020019074\H,-2.7107546059,3.6841170718,-1.3447175992\C,-5.23724137  
68,4.5239330606,1.479937043\H,-3.9978930123,3.3136987522,2.7501177212\  
C,-5.4206075827,5.0463865697,0.1974940355\H,-4.6358118202,5.1300150902  
, -1.8137284875\H,-5.9679434861,4.7198447715,2.2604311645\H,-6.29345943  
23,5.6563088916,-0.0217857365\H,1.8366584679,1.7640407357,-3.322071430  
2\H,0.565588151,2.212795,-2.198749457\H,1.1427945871,0.9412355321,0.16  
19263349\C,2.9461902783,0.9387328704,1.2345979092\C,2.2059955772,1.351  
6414329,2.3505184579\C,4.2918902752,0.5984970628,1.4313927502\C,2.7879  
053826,1.4575303306,3.6136323695\H,1.1487794604,1.5541861123,2.2355953  
539\C,4.8777192287,0.6983781239,2.69171383\H,4.8795719298,0.2302569877  
,0.6045985183\C,4.1336043273,1.1367803916,3.7889203787\H,2.180831395,1  
.773791904,4.4572686017\H,5.9191728621,0.4160815503,2.8182031177\H,4.5  
939743034,1.2093973768,4.7702894606\O,-1.728335306,1.5651048971,-1.718  
7092814\C,-1.8832833134,1.7902467633,-3.0378783211\O,-1.2953553714,0.9  
597024304,-3.8735461352\O,-2.5661839084,2.7649690285,-3.3962309099\H,-  
0.305104566,0.3635076983,-3.3153204125\

### Int6

1\1\GINC-OMC-1-801\Freq\RB3LYP\GenECP\C60H63N1O9P1Pd1(1-)\SHIMGRP\16-D  
ec-2023\0\#P Geom=AllCheck Guess=TCheck SCRF=Check GenChk RB3LYP/GenE  
CP Freq\TS2\1,1\C,-1.972458343,-2.8922065486,-0.4283221323\C,-2.102  
2917267,-2.2363752826,-1.7668806728\C,-1.9943166185,-0.9013593044,-1.8  
450662814\C,-1.8705110104,-2.03160101,0.7788689825\C,-1.7810520071,-0.  
6917030515,0.6296038955\C,-1.8855685305,0.0284737834,-0.679730269\H,-2  
.0673784396,-0.4015095104,-2.8048133535\H,-1.6832796674,-0.0602355193,  
1.5000891965\C,-2.421363048,-3.1039819345,-2.9918722901\C,-1.927875592

6,-2.6929558844,2.167296357\O,-1.962671004,-4.1274472401,-0.3392817488  
\C,-2.6075959387,-2.2478002987,-4.2565456928\C,-1.2883755924,-4.113910  
2564,-3.2641071153\H,-3.4278417676,-1.5316271519,-4.1419444479\H,-2.84  
91102766,-2.9014255792,-5.1011942683\H,-1.6970807205,-1.6966014434,-4.  
5147889139\C,-0.7451757495,-3.6608717963,2.3804049731\H,-0.710049683,-  
4.4176650521,1.5965696784\H,-0.849283276,-4.1625399455,3.3493189048\H,  
0.1948764313,-3.1090788236,2.4031178905\C,-3.256836185,-3.4762831379,2  
.2928491215\H,-3.3261456172,-4.2631094599,1.5413818359\H,-4.1171044695  
,-2.8070439133,2.1813105037\H,-3.3193242911,-3.9330008043,3.2872680863  
\C,-1.8928220539,-1.6426564184,3.2910433819\H,-0.9796372869,-1.0448379  
042,3.2629441494\H,-1.9193311806,-2.1555605129,4.2584126827\H,-2.74495  
10764,-0.9594142396,3.2451347606\C,-3.1935515051,0.9382519753,-0.77476  
87559\C,-0.7411380418,2.2229395996,-0.186562729\C,-3.2460861589,2.1166  
596577,0.2714054962\C,-1.8326951355,2.517578846,0.8007295561\C,-3.9035  
628129,3.371925039,-0.3342327667\C,-4.1345220567,1.7283630037,1.463325  
0537\C,-0.7197787839,1.0073970697,-0.885837953\C,0.480321922,0.6746736  
475,-1.5930197913\H,0.5628892252,-0.3082683521,-2.0447292572\H,1.00653  
53957,1.4715033662,-2.1142555592\O,-3.9509677866,4.4367841773,0.241450  
5137\O,-4.4464629418,3.1647487122,-1.5531590763\C,-5.2862726837,4.2208  
403044,-2.0628204522\C,-6.688424291,4.0802489638,-1.4908610434\H,-5.27  
40628848,4.0866920726,-3.1470766722\H,-4.8416839286,5.1849415634,-1.80  
71725682\H,-7.0899019893,3.0870863784,-1.7111812013\H,-7.352819228,4.8  
364464375,-1.9222521435\H,-6.6643479498,4.2115291736,-0.4067493911\O,-  
3.7544838559,1.1557802186,2.460257379\O,-5.4232330377,2.0547924964,1.2  
377384465\C,-6.3773072361,1.6513450742,2.2436776106\C,-6.4064371577,2.  
6423311466,3.3954797727\H,-7.3292810492,1.6155432273,1.7094944291\H,-6  
.1186589338,0.6469299553,2.5863428476\H,-6.6083635441,3.6528355737,3.0  
288488617\H,-5.4478692581,2.6435101647,3.9182299475\H,-7.1915114638,2.  
3655380214,4.1073012457\H,-0.3526154141,-3.5900416842,-3.4778747799\H,  
-1.5421187045,-4.7334121371,-4.1332093978\H,-1.1322001612,-4.760075761  
7,-2.4014026492\C,-3.7510448671,-3.8520718682,-2.7350471944\H,-4.56053  
04119,-3.1417135183,-2.5386329362\H,-3.6601524969,-4.522993487,-1.8810  
894147\H,-4.0197093047,-4.4430336922,-3.618944771\C,3.0254983706,-2.88  
15990373,2.63204958\C,2.9109027094,-3.5133343691,3.867522203\C,2.38914  
46501,-1.6511631618,2.3976640637\C,1.685826409,-1.0339501807,3.4422110  
333\C,1.5913368734,-1.6665377044,4.6854985079\C,2.1859465769,-2.908235  
2131,4.8982060244\H,3.6024050766,-3.3565610598,1.845999318\H,3.3919792  
704,-4.474579293,4.0281562413\H,1.0396680936,-1.1793743063,5.484239206  
5\H,2.0967689292,-3.4017573059,5.8624740524\H,1.241740486,-0.048817798  
5,3.2809674932\P,2.55705796,-0.696249732,0.8219736418\C,4.3177641285,-  
0.2147267815,1.0450569028\C,2.5114696644,-1.986156488,-0.5044033114\C,  
5.3626008849,-1.1304410938,0.8782753794\C,4.5829899148,1.0805100351,1.  
5088568526\C,5.8936999037,1.4330926786,1.832599571\C,6.671949309,-0.76  
31368654,1.192720085\C,6.9368867072,0.5167650283,1.6855259284\H,5.1588

207468,-2.1263004994,0.4950760264\H,3.7748480063,1.813679673,1.5675121  
141\H,6.0973324307,2.4397166048,2.1852703435\H,7.954774771,0.801871365  
2,1.939001559\H,7.4806735371,-1.4774840729,1.0593209519\C,1.8678048146  
, -3.2047288507,-0.2317909722\C,2.9144304918,-1.7538755767,-1.848019763  
2\C,2.7584674417,-2.76051199,-2.8148441268\C,2.1745123122,-3.980373569  
9,-2.4963138037\C,1.6977143486,-4.1872495774,-1.2027430115\H,3.0822405  
195,-2.5531728385,-3.8278909301\H,2.056934279,-4.7444691689,-3.2583078  
729\H,1.1773036777,-5.1040048859,-0.9447104179\H,1.4759787585,-3.38689  
258,0.7575994991\C,3.3886697095,-0.4431398165,-2.3039118778\O,3.424508  
3343,-0.2478910933,-3.6674056622\C,3.8790042323,1.1107991651,-3.857071  
9318\N,3.6782859328,0.5484901742,-1.5609124729\C,3.9391774131,1.705196  
7638,-2.4124898889\H,3.1695859062,1.6216136796,-4.5124462712\H,4.86511  
65465,1.0862394204,-4.3316887046\Pd,0.9592900495,0.9449292788,0.478284  
4389\H,3.1305324957,2.4273025405,-2.2443265183\C,5.2577473605,2.384787  
9675,-2.118770539\C,5.4479877246,3.7211270269,-2.4863215166\C,6.312466  
3366,1.6811010639,-1.5332430783\C,6.679808798,4.3428205924,-2.28600733  
42\H,4.6208490908,4.2809256897,-2.9162164943\C,7.542235752,2.304207973  
9,-1.325306428\H,6.1525014284,0.6604080084,-1.2058201962\C,7.73328676,  
3.6326925594,-1.7064689714\H,6.812235925,5.3838029163,-2.5674644029\H,  
8.3433089521,1.7514180502,-0.8437548287\H,8.6904955374,4.118411854,-1.  
5378401103\H,-0.10508073,3.0422002057,-0.5097268653\H,-1.8483253114,3.  
5758992404,1.0605021209\H,-3.0522829081,1.4413388914,-1.7313459459\C,-  
4.4622660881,0.1161397827,-0.9157654588\C,-5.1925493222,0.1932602193,-  
2.1087102198\C,-4.9037496908,-0.777009052,0.069948262\C,-6.3246793053,  
-0.5939015237,-2.3171493555\H,-4.8651189789,0.8837637965,-2.879109287\  
C,-6.0329656247,-1.5684566045,-0.1346054196\H,-4.3580278746,-0.8663918  
946,0.9983449225\C,-6.7493836403,-1.4830968633,-1.3289226397\H,-6.8696  
701831,-0.5170508553,-3.2539883089\H,-6.3433776299,-2.2628342401,0.640  
9104598\H,-7.625372803,-2.1049717665,-1.489454249\O,0.7759961106,1.619  
2311352,2.4323881035\C,1.5017737939,2.779904049,2.383361139\O,2.095223  
4435,2.9768194721,1.2410794237\O,1.5377263819,3.5107445095,3.380004744  
7\H,-1.6298206241,1.9876695937,1.7358447521\

**TS6**

1\1\GINC-OMC-1-822\Freq\RB3LYP\GenECP\C60H63N1O9P1Pd1(1-)\SHIMGRP\21-D  
ec-2023\0\#p freq genecp b3lyp empiricaldispersion=gd3bj geom=check g  
uess=read\TS2\ -1,1\C,2.9090584234,-2.888838846,0.4619712814\C,2.7263  
908528,-2.2364806256,1.7963630583\C,2.2973523527,-0.9660749589,1.83253  
16231\C,2.3711338698,-2.2025723598,-0.7408482774\C,1.9722625804,-0.915  
992951,-0.6443375996\C,2.0128687975,-0.1239108536,0.6308849222\H,2.205  
048272,-0.443281589,2.7786560188\H,1.6143944314,-0.3841115129,-1.52152  
27138\C,3.110831656,-3.0137242079,3.0604614072\C,2.3700776862,-2.95267  
6138,-2.0815761929\O,3.4966835086,-3.9753424673,0.3772828179\C,2.78425  
1633,-2.2163549614,4.3347598705\C,2.3290933399,-4.3444790113,3.1177281

16\H,3.362628867,-1.2883407233,4.3916105181\H,3.0384235284,-2.81851361  
95,5.2134495515\H,1.7201069526,-1.9642069265,4.3969451819\C,1.70179804  
52,-4.3363109082,-1.9196009229\H,2.283493857,-4.9895772833,-1.26954802  
96\H,1.6030305073,-4.8131028136,-2.9022009553\H,0.7005608513,-4.232645  
8057,-1.4915716884\C,3.8318158698,-3.1415415627,-2.5520977594\H,4.4252  
237763,-3.6674931301,-1.8019880067\H,4.289009874,-2.168233842,-2.76088  
91027\H,3.8500292425,-3.7206770058,-3.4834486784\C,1.6162316537,-2.164  
2712283,-3.1669163995\H,0.5851982177,-1.9276689322,-2.8919478507\H,1.6  
035927062,-2.7591616895,-4.0881774859\H,2.0925599162,-1.2074471936,-3.  
3878272785\C,3.1457207356,0.9994162913,0.6400384097\C,0.5369914669,1.8  
06849387,0.0625695185\C,2.9897414051,2.0645988571,-0.5059634641\C,1.50  
1912665,2.2794408042,-0.9034915751\C,3.5166121301,3.4433517093,-0.0616  
848992\C,3.8620246346,1.6494904416,-1.7040972361\C,0.6854335492,0.6355  
585114,0.8111628146\C,-0.3932244425,0.1221524882,1.6277148605\H,-0.195  
2048092,-0.7644696318,2.2244705699\H,-1.0281360501,0.8454098912,2.1341  
247881\O,3.4565940111,4.435760665,-0.7545555247\O,4.0518477371,3.44908  
89048,1.1823215377\C,4.762821284,4.6440021728,1.5587683747\C,6.1801415  
026,4.5903639227,1.0086226036\H,4.7511725274,4.6436452579,2.6517051571  
\H,4.2204672585,5.5158453648,1.1861800505\H,6.6862318871,3.6839735626,  
1.3527240383\H,6.7515200303,5.4649609803,1.3380602995\H,6.1539409589,4  
.5778701623,-0.0833398278\O,3.5617313016,0.8490656514,-2.556956808\O,5  
.0842997953,2.2324099383,-1.6334933915\C,6.0390088074,1.8335807861,-2.  
6363797442\C,5.8114574471,2.5860504127,-3.9377650085\H,7.0097085995,2.  
068540453,-2.1930890222\H,5.9632419147,0.753576191,-2.7838962874\H,5.8  
324924374,3.6659892401,-3.7650107107\H,4.8426171029,2.3168530973,-4.36  
30817779\H,6.5942329119,2.3313951373,-4.6607554386\H,1.2499104018,-4.1  
552788274,3.1436487082\H,2.5977746178,-4.8985085629,4.0251728196\H,2.5  
539189553,-4.9634795825,2.2495599352\C,4.6324273233,-3.2896737466,3.05  
26140177\H,5.1908929603,-2.3493531654,3.0126395023\H,4.9088698146,-3.8  
926699152,2.1887494145\H,4.9186039935,-3.8228804441,3.9679335394\C,-4.  
3703610896,-3.2343275951,-1.8400094767\C,-4.3495168315,-4.3449570227,-  
2.6815825005\C,-3.1714744867,-2.6598300251,-1.3913057589\C,-1.95384858  
29,-3.1996189115,-1.8219005003\C,-1.9340688588,-4.3062569417,-2.671723  
8049\C,-3.1296583244,-4.8834172422,-3.0981709739\H,-5.3204433503,-2.80  
47823324,-1.5409594686\H,-5.2845962577,-4.7816004345,-3.0222494704\H,-  
0.9822998007,-4.7020818488,-3.0090482857\H,-3.1130645905,-5.7419696074  
,-3.7642222736\H,-1.0302837856,-2.7213228393,-1.5166188136\H,-3.125467  
8476,-1.1751129321,-0.3016742851\C,-4.5227900575,-0.2006985091,-0.9861  
291918\C,-3.7341379678,-1.8232597712,1.3256433454\C,-5.8447532714,-0.4  
356171527,-0.586519823\C,-4.2440031284,0.7675459421,-1.96131021\C,-5.3  
013657217,1.4700132274,-2.5418144284\C,-6.8936686013,0.2740249861,-1.1  
746180566\C,-6.6223764988,1.2232021335,-2.1625198788\H,-6.0552636927,-  
1.1627153228,0.192853343\H,-3.216185439,0.996927079,-2.2485450392\H,-5  
.0784713788,2.2277878532,-3.2870333428\H,-7.4368576896,1.7767096058,-2

.6231436162\H,-7.9169967226,0.0863306317,-0.8595052531\C,-3.9373811916  
,-3.202618191,1.4849420447\C,-3.8648289336,-1.0053758992,2.4806628378\  
C,-4.1855632694,-1.5787236329,3.7200180232\C,-4.389488593,-2.948472113  
4,3.845286962\C,-4.2633016195,-3.7610611114,2.7201655896\H,-4.26871683  
38,-0.9272282635,4.5820201064\H,-4.6390804245,-3.3757099692,4.81187666  
32\H,-4.413871401,-4.8340969718,2.7982446303\H,-3.8318220187,-3.852803  
387,0.6257860854\C,-3.6545946973,0.4442686262,2.432021091\O,-3.4616867  
35,1.0797523377,3.6382725807\C,-3.388878186,2.4895639092,3.3232600157\  
N,-3.6034453207,1.1568138304,1.376883256\C,-3.2655596574,2.5237638539,  
1.7703475024\H,-2.5300537207,2.9139193384,3.8464361196\H,-4.3089987131  
,2.9738721266,3.6682511412\Pd,-1.0839654712,-0.1804080211,-0.312108702  
8\H,-2.2242325203,2.7044419459,1.4716591915\C,-4.1398908276,3.57114899  
33,1.1206188427\C,-3.7726752563,4.9199825172,1.1905098627\C,-5.3270582  
034,3.2177834526,0.475905005\C,-4.5874808675,5.9048892737,0.6343768003  
\H,-2.8366226661,5.1983230156,1.6696219248\C,-6.1375291339,4.202391585  
5,-0.0886753991\H,-5.593918874,2.1714718606,0.3946269171\C,-5.77557802  
65,5.5471120548,-0.006900617\H,-4.2884871863,6.9479672822,0.6882992047  
\H,-7.0448383119,3.9080665942,-0.6077190422\H,-6.4055432891,6.31202296  
86,-0.4524808311\H,-0.3850654305,2.3743772772,0.1662908049\H,1.3330941  
171,3.3174109719,-1.1856449553\H,2.9198482451,1.5522869371,1.552468410  
2\C,4.5404437901,0.4270283836,0.8291458084\C,5.2532009565,0.7509817642  
,1.9912835087\C,5.1286601089,-0.4708126304,-0.072725339\C,6.5118418813  
,0.2072853773,2.2460034091\H,4.81109045,1.4436365664,2.6998900815\C,6.  
3831715119,-1.0233991931,0.1815348833\H,4.6007049095,-0.7551713121,-0.  
9708042918\C,7.0835293083,-0.6872620676,1.339856068\H,7.0408419133,0.4  
760402081,3.1565611338\H,6.8042049169,-1.7298617099,-0.5279069028\H,8.  
0587256848,-1.1226805766,1.5387466904\O,0.6292690412,0.9629608951,-2.9  
882629683\C,-0.6525153311,0.9664428607,-2.711491892\O,-1.1706418605,-0  
.236793314,-2.4215639828\O,-1.3496733613,2.0047340451,-2.6561670205\H,  
1.1948909387,1.6886662822,-1.9873931568\

## Int7

1\1\GINC-OMC-1-807\Freq\RB3LYP\GenECP\C60H63N1O9P1Pd1(1-)\SHIMGRP\19-D  
ec-2023\0\#P Geom=AllCheck Guess=TCheck SCRF=Check GenChk RB3LYP/GenE  
CP Freq\TS2\ -1,1\C,1.0888631226,0.7515676372,2.7830635705\C,1.451780  
3009,1.9515000312,1.9725002574\C,1.8126692652,1.7771520489,0.693223450  
7\C,1.235544977,-0.596645824,2.1705524514\C,1.5914867614,-0.6995483919  
,0.8702481848\C,1.9576184145,0.4629175555,-0.0014845387\H,2.087553913,  
2.630026532,0.0824034933\H,1.6235598342,-1.6651679339,0.3797087321\C,1  
.4400331099,3.332524943,2.6398700449\C,0.9695546252,-1.826757617,3.051  
8432956\O,0.6770828819,0.886525749,3.9433824652\C,1.9355996521,4.42771  
14169,1.6793889088\C,0.0053826137,3.6965663344,3.0757356562\H,2.961278  
6742,4.2387659069,1.3452382196\H,1.9226642164,5.3929293703,2.196733128  
\H,1.2926122334,4.5177037654,0.797252665\C,-0.4991046135,-1.8381118244

,3.5255672821\H,-0.7322529322,-0.9436877305,4.1023641937\H,-0.68578780  
57,-2.7235365666,4.1457124662\H,-1.1689330605,-1.8882523557,2.66589448  
35\C,1.9128435585,-1.792342498,4.2781718971\H,1.7466380556,-0.90148556  
74,4.8830407729\H,2.9624481371,-1.8108576892,3.9604880002\H,1.73987575  
08,-2.6793004434,4.8991774875\C,1.2434216406,-3.1358026429,2.293820076  
5\H,0.6230193678,-3.2486625098,1.4043748302\H,1.0453181365,-3.98209464  
38,2.9611562185\H,2.2867566837,-3.2059301963,1.9670051709\C,3.48288464  
06,0.4397573523,-0.4521523456\C,1.6025912707,-0.3749019813,-2.37356011  
7\C,3.8618759692,-0.7908596808,-1.3380838596\C,2.7822359106,-1.0305760  
367,-2.3716981442\C,5.1208502514,-0.5088716633,-2.1820831931\C,4.20772  
43392,-2.0731218973,-0.5566878506\C,1.0920174299,0.4311607318,-1.28152  
36787\C,-0.0223506759,1.2957514746,-1.3906493252\H,-0.1704936753,2.087  
2220887,-0.6630748864\H,-0.4168770193,1.4993648363,-2.3858567098\O,5.7  
785570727,-1.3858054723,-2.7039489219\O,5.381230712,0.8060730056,-2.34  
30011211\C,6.5732453253,1.1272514676,-3.0883559366\C,7.8004808365,1.02  
42073631,-2.1951784558\H,6.4101927992,2.1499190361,-3.4368683057\H,6.6  
47910469,0.4558130437,-3.946847515\H,7.6796979596,1.6468002714,-1.3042  
715296\H,8.693214883,1.3520855851,-2.7386840571\H,7.9454657108,-0.0107  
534805,-1.8778704406\O,3.5414357945,-3.0854826694,-0.5051352677\O,5.39  
03600185,-1.9433271714,0.0719533256\C,5.8724525781,-3.0886282663,0.801  
5443707\C,6.5734567344,-4.0594499782,-0.1351487493\H,6.5552702782,-2.6  
665188107,1.5427115276\H,5.0321662358,-3.5654428209,1.3122930296\H,7.3  
658907971,-3.5499457206,-0.6899522279\H,5.8599130922,-4.4724233139,-0.  
8510735518\H,7.0138607419,-4.8834062555,0.4367012595\H,-0.6491474736,3  
.7704780361,2.2022790344\H,0.0032607903,4.6679335955,3.5865789881\H,-0  
.399900457,2.9422105582,3.7489434965\C,2.3898970433,3.3194502701,3.859  
9143454\H,3.4058381209,3.0501682017,3.5516992233\H,2.0505492145,2.6030  
779856,4.6073128535\H,2.4223895462,4.3166717495,4.3156252285\C,-4.6112  
753142,-2.6266322316,1.2195904604\C,-4.8341957549,-3.8838548459,1.7763  
627496\C,-3.34470677,-2.2786172218,0.7223229649\C,-2.3175049851,-3.229  
6617669,0.7566393499\C,-2.5434465126,-4.4911867225,1.3125123636\C,-3.7  
952425439,-4.8185137862,1.8295977725\H,-5.4247468478,-1.9091661722,1.1  
710901345\H,-5.8180013542,-4.1377226882,2.162716489\H,-1.7332941226,-5  
.2140648024,1.3283504999\H,-3.969546498,-5.8007390248,2.2613927349\H,-  
1.3605023624,-2.9998576009,0.3049621189\H,-2.9913772316,-0.6206203185,  
-0.0329067502\C,-4.4925962724,-0.5201748045,-1.0910725169\C,-3.2996829  
093,0.5298062481,1.3910671969\C,-5.693270297,0.086671921,-0.7082419769  
\C,-4.4062783272,-1.1589687008,-2.3367695903\C,-5.5168939277,-1.194345  
1836,-3.1804065391\C,-6.8011188618,0.0521580863,-1.5567622044\C,-6.717  
2166355,-0.5923616763,-2.7931094291\H,-5.7553586638,0.5996015041,0.246  
8020921\H,-3.4670567989,-1.6238042504,-2.6301694715\H,-5.441777433,-1.  
6892751128,-4.1445408123\H,-7.5804253516,-0.6203826046,-3.4527831717\H  
,-7.7275997664,0.5337051876,-1.2550799336\C,-3.4339600687,-0.004082767  
1,2.6841429433\C,-3.2100766345,1.9449091079,1.2848900574\C,-3.28796758

28,2.7475904732,2.4339581657\C,-3.4335448117,2.1878617447,3.6969092164  
\C,-3.4964633725,0.8017388076,3.8180833774\H,-3.2154755956,3.821739392  
6,2.3163848556\H,-3.4786399742,2.8260748239,4.5738500576\H,-3.58798491  
25,0.3382716577,4.796054039\H,-3.4749845596,-1.0767716609,2.8101194389  
\C,-3.0095529518,2.631869428,0.0058688014\O,-2.5101764861,3.9154519509  
,0.0924848992\C,-2.5088604917,4.4324861316,-1.253688767\N,-3.234148650  
5,2.1694544773,-1.1604848469\C,-2.8328878285,3.1906566744,-2.132372760  
9\H,-1.5272773689,4.8685302482,-1.4496917008\H,-3.2788573417,5.2081296  
711,-1.3335106832\Pd,-0.9013950694,-0.5637809599,-0.9668104177\H,-1.91  
85853451,2.8335872954,-2.6230736537\C,-3.8771048788,3.423377547,-3.204  
5435606\C,-3.8225790061,4.5660747988,-4.0120303227\C,-4.8858332584,2.4  
814596701,-3.4268264464\C,-4.7664865812,4.7697105417,-5.0190718038\H,-  
3.0352471427,5.3010503401,-3.8600398142\C,-5.828452404,2.6845243558,-4  
.4341241774\H,-4.9231805709,1.597707758,-2.8059503409\C,-5.7752766886,  
3.8282373438,-5.2322604413\H,-4.7127694895,5.6621215715,-5.6368668011\  
H,-6.6037965258,1.9396904619,-4.5878438077\H,-6.5107816708,3.985264191  
4,-6.0165112621\H,0.9359023223,-0.5427874812,-3.2151161327\H,3.0092023  
613,-1.7470023121,-3.1514239298\H,3.5340944932,1.2691278542,-1.1587017  
226\C,4.4251384446,0.7988909495,0.6829005895\C,5.180979821,1.974364003  
2,0.5819752751\C,4.508051806,0.0683661131,1.8764932561\C,5.9894351005,  
2.412279986,1.6318688339\H,5.125428129,2.5538229561,-0.3339946077\C,5.  
3063105058,0.503881678,2.9314159953\H,3.9241869177,-0.8327958003,1.996  
2155929\C,6.0526295363,1.6784520282,2.8162195866\H,6.5594430273,3.3314  
851819,1.526499225\H,5.3340478105,-0.0728613752,3.8516192493\H,6.67111  
01663,2.0191417934,3.6417916606\O,0.7546618485,-3.4447736579,-0.919788  
0864\C,0.115302516,-3.1466609388,-2.1333168378\O,-1.0338064784,-2.6201  
483981,-1.9553639802\O,0.7075329763,-3.4146695265,-3.1813369938\H,1.68  
75407218,-3.6100808519,-1.1291061049\

#### 4a

1\1\GINC-OMC-1-824\Freq\RB3LYP\6-31G(d,p)\C32H40O5\SHIMGRP\13-Nov-2023  
\0\#P Geom=AllCheck Guess=TChef SCRF=Check GenChk RB3LYP/6-31G(d,p)  
Freq\product\0,1\C,-3.0004204568,-0.9144277183,0.404070799\C,-2.9966  
912245,0.4501582877,-0.21152352\C,-1.9296220612,0.8336437812,-0.930117  
2279\C,-1.9027202489,-1.8584265626,0.0409605889\C,-0.8588695327,-1.395  
9758478,-0.6659456699\C,-0.6812198249,0.0285102052,-1.1075145521\H,-1.  
8981537621,1.8179171936,-1.3771392292\H,-0.052768309,-2.0636252694,-0.  
9397466209\C,-4.1955609069,1.3769338004,0.0277912666\C,-1.9804145334,-  
3.3102193831,0.5313153556\O,-3.9013388958,-1.2540815807,1.1746672253\C  
, -4.0415178466,2.7057956808,-0.7321882368\C,-5.4967227426,0.6980229189  
, -0.4530894702\H,-3.1590166736,3.2655967323,-0.4063832198\H,-4.9193683  
584,3.3309784195,-0.5435455016\H,-3.9717878479,2.55183352,-1.814344483  
2\C,-3.2913464943,-3.967928197,0.0485043729\H,-4.1629331468,-3.4416251  
595,0.4362632893\H,-3.3318718707,-5.0077764688,0.390645179\H,-3.341351



4985,-3.9718224664,-1.046014\C,-1.9085023228,-3.3257476551,2.075839348  
8\H,-2.751695376,-2.7908205655,2.5116191787\H,-0.9780455458,-2.8595155  
51,2.4138051755\H,-1.925979236,-4.3607247702,2.4359337232\C,-0.8042878  
012,-4.1478766464,0.0003319391\H,-0.77811461,-4.171091532,-1.094496986  
8\H,-0.9105414337,-5.1786707256,0.3514461204\H,0.1545632924,-3.7693326  
429,0.3670567034\C,0.4318252138,0.7139848755,-0.1928111821\C,1.1830810  
051,-0.3388225065,-2.7827030364\C,1.8369511195,0.0702756763,-0.3934352  
352\C,2.1156841534,-0.3317908069,-1.8211216315\H,3.143849164,-0.583205  
6058,-2.0484329294\C,0.4312059791,2.2238945871,-0.3523362349\H,0.13602  
11624,0.4910840354,0.832137122\C,-0.1203235941,3.0033244745,0.67312897  
54\C,0.9202595992,2.8694229706,-1.4947665489\C,0.8503641387,4.25860314  
59,-1.6072138828\C,-0.1948893054,4.389917801,0.5608339905\C,0.28950962  
07,5.0231582773,-0.5851689633\H,0.2333469634,6.1033653318,-0.678048016  
8\H,1.2372158654,4.7423352714,-2.4988941061\H,-0.5010057413,2.51026168  
01,1.5625844975\H,-0.6287645097,4.9741004998,1.3667072524\H,1.36862371  
65,2.2909373048,-2.2923774206\C,2.9278006092,1.0707829483,0.0496476759  
\C,2.0151382986,-1.1374978211,0.5576949499\C,-0.2214681912,-0.00578154  
2,-2.5647639893\C,-1.062599464,0.1767472263,-3.5931007221\H,-2.1103634  
802,0.4086227226,-3.4406873269\H,-0.716398099,0.0908397578,-4.61867783  
27\O,3.7882843229,1.5245058905,-0.6679727438\O,2.7792006664,1.36032856  
5,1.353446169\C,3.6888701584,2.3465977894,1.9016774491\C,5.0056307279,  
1.704605445,2.3015821125\H,3.1542892343,2.753283254,2.7618025387\H,3.8  
336585697,3.1326767282,1.1576930782\H,4.8371958069,0.8872952103,3.0086  
461421\H,5.6519743471,2.4469432619,2.780373632\H,5.5213596819,1.314275  
4952,1.4215201643\O,1.2588956502,-1.4642798054,1.4428971879\O,3.171423  
0097,-1.7674071872,0.2864074499\C,3.5019392449,-2.8864585173,1.1459205  
746\C,4.8852228682,-3.3590372686,0.7517647699\H,3.4541041643,-2.551737  
7675,2.1857976198\H,2.7437549076,-3.6637242079,1.0108605967\H,5.620552  
3712,-2.5610266026,0.8856372548\H,4.9056731168,-3.6756566385,-0.294494  
0516\H,5.1782383957,-4.2084724477,1.3756754953\H,-5.4394404498,0.47039  
0052,-1.5232366337\H,-6.345825526,1.3724298135,-0.2981916675\H,-5.6834  
26219,-0.2270096225,0.0912720869\C,-4.2942597857,1.7035580326,1.535690  
0516\H,-3.38053276,2.2013497696,1.878533341\H,-4.4434030287,0.79915602  
92,2.1242002087\H,-5.1350132335,2.3831976126,1.7134224523\H,1.47499720  
35,-0.5936227554,-3.7986625904\

### PdLn+HCO<sub>3</sub><sup>-</sup>

1\1\GINC-OMC-1-816\Freq\RB3LYP\GenECP\C28H23N1O4P1Pd1(1-)\SHIMGRP\25-D  
ec-2023\0\#P Geom=AllCheck Guess=TCheck SCRF=Check GenChk RB3LYP/GenE  
CP Freq\lezuolin\ -1,1\C,-1.1104192954,-2.2367181324,-2.2881830818\C,-  
1.129134007,-3.610527985,-2.5271711146\C,-1.4419851586,-1.7287588847,-  
1.0251487151\C,-1.7769585077,-2.6238366912,-0.0012621794\C,-1.79023831  
04,-3.9994567322,-0.2379128273\C,-1.4690223651,-4.4961835512,-1.502257  
593\H,-0.8143126676,-1.5357099154,-3.0645753067\H,-0.8638833185,-3.990

2936072,-3.5102269415\H,-2.0458572615,-4.6835238299,0.5674645731\H,-1.473733395,-5.5676826544,-1.6847195794\H,-2.0185444776,-2.2439846326,0.986491465\O,-1.4086661032,0.1100202766,-0.8123738755\C,-3.2167856256,0.5147438342,-0.9357527882\C,-1.1785760054,0.2402362651,1.0430985346\C,-4.2507712061,-0.4296337518,-0.8837946046\C,-3.5498786927,1.8676794804,-1.1092517311\C,-4.8807911797,2.2684128684,-1.2032234015\C,-5.5851394198,-0.0302348712,-0.9953370305\C,-5.9049465901,1.3186925514,-1.149129771\H,-4.0135066205,-1.4803915338,-0.7570706849\H,-2.7432773663,2.5918525611,-1.1894523289\H,-5.1196429091,3.3204783518,-1.3347580216\H,-6.943247087,1.6280244229,-1.2360330848\H,-6.3748703335,-0.7766491224,-0.9606241107\C,-2.2678834952,0.3996671018,1.911966568\C,0.1197033396,0.2828443896,1.6038172901\C,0.2968050274,0.4992839646,2.9728001218\C,-0.8012076103,0.6518554151,3.8170762386\C,-2.0870112367,0.5952127933,3.2823489935\H,1.3094118849,0.5531978336,3.3590730419\H,-0.6521004018,0.8170656553,4.880435037\H,-2.9543496208,0.7108534678,3.9272274988\H,-3.2742824595,0.3792264751,1.5101633587\C,1.3184259295,0.1607064645,0.7484390228\O,1.3308152624,-0.9148466238,-0.0840839126\C,2.5234664022,-0.7687996921,-0.9031312528\N,2.2858227541,0.9922003257,0.7067436111\C,3.0948794243,0.6093524304,-0.4667530948\H,2.240532748,-0.7600266317,-1.9548677841\H,3.1903448708,-1.6053176474,-0.6707792863\Pd,-0.1016908341,1.2175119653,-2.1405835966\H,2.8680462653,1.3282217273,-1.2589794367\C,4.5851377525,0.5960908297,-0.2432982292\C,5.4318153648,0.6372623681,-1.3606610045\C,5.1400896004,0.5013691615,1.0355706977\C,6.8146146004,0.5759521853,-1.1914035436\H,4.9846598372,0.7196387483,-2.34955641\C,6.5251648979,0.4457328906,1.2020315558\H,4.4734131423,0.4869310098,1.8921567258\C,7.366843523,0.4797133327,0.0890183038\H,7.464636204,0.6096235448,-2.0620959317\H,6.9476814934,0.3780449174,2.2018126158\H,8.4455371016,0.43677269,0.217981212\C,2.3488796697,1.7796897988,-3.8878703864\O,1.2159117663,2.2266844089,-3.4888598422\O,2.9417993639,0.7346422808,-3.6007803561\O,2.9845989426,2.6380483212,-4.7770924981\H,2.3666071232,3.378091502,-4.8613478882\

### HCO<sub>3</sub><sup>-</sup>

1\1\GINC-OMC-1-817\Freq\RB3LYP\6-31G(d,p)\C1H1O3(1-)\SHIMGRP\25-Dec-2023\0\#P Geom=AllCheck Guess=TChech SCRF=Check GenChk RB3LYP/6-31G(d,p) Freq\zeuolin\ -1,1\C,-2.9199354702,-2.3816291951,0.0639137687\O,-4.1065075797,-2.4197965366,-0.2931400466\O,-2.0576125434,-3.2729019185,0.2578726275\O,-2.4174065816,-1.0401071934,0.309501425\H,-1.5071203251,-1.2440785464,0.5665086253\

## (M) References

- 1 A. G. Burra, D. Uredi, D. R. Motati, F. R. Fronczek, E. B. Watkins, Remote Functionalization of 8-Substituted Quinolines with *para*-Quinone Methides: Access to Unsymmetrical Tri(hetero)arylmethane, *Eur. J. Org. Chem.* 2022, **32**, e202200191.
- 2 J. Chen, S. Gao, and M. Chen, Cu-Catalyzed Silylation and Borylation of Vinylidene Cyclopropanes, *Org. Lett.*, 2019, **21**, 8800-8804.
- 3 B. M. Sharma, J. Rathod, R. G. Gonnade, P. Kumar, Harnessing Nucleophilicity of Allenol Ester with *p*-Quinone Methides via Gold Catalysis: Application to the Synthesis of Diarylmethine-Substituted Enones, *J. Org. Chem.* 2018, **83**, 9353–9363.
- 4 D. Richter, N. Hampel, T. Singer, A. R. Ofial, H. Mayr, Synthesis and Characterization of Novel Quinone Methides: Reference Electrophiles for the Construction of Nucleophilicity Scales, *Eur. J. Org. Chem.* 2009, **19**, 3203.
- 5 Y. Lou, P. Cao, T. Jia, Y. Zhang, M. Wang, J. Liao, Copper-Catalyzed Enantioselective 1,6-Boration of *para*-Quinone Methides and Efficient Transformation of gem-Diarylmethine Boronates to Triarylmethanes, *Angew. Chem. Int. Ed.* 2015, **127**, 12302–12306.
- 6 A. Ali, R. Jajoria, H. K. Harit, R. P. Singh, Diastereoselective 1,6-Addition of  $\alpha$ -Phosphonyloxy Enolates to *para*-Quinone Methides, *J. Org. Chem.* 2022, **87**, 5213–5228.
- 7 P. C. Unangst, D. T. Connor, W. A. Cetenko, R. J. Sorenson, C. R. Kostlan, J. C. Sircar, C. D. Wright, D. J. Schrier, R. D. Dyer, Synthesis and biological evaluation of 5-[[3,5-bis(1,1-dimethylethyl)-4-hydroxyphenyl]methylene]oxazoles, -thiazoles, and -imidazoles: novel dual 5-lipoxygenase and cyclooxygenase inhibitors with antiinflammatory activity, *J. Med. Chem.* 1994, **37**, 322–328.
- 8 A. López, A. Parra, C. Jarava-Barrera, M. Tortosa, Copper-catalyzed silylation of *p*-quinone methides: new entry to dibenzylic silanes, *Chem. Commun.* 2015, **51**, 17684–17687.
- 9 Gaussian 16, Revision A.03, M. J. Frisch, G. W. Trucks, H. B. Schlegel, G. E. Scuseria, M. A. Robb, J. R. Cheeseman, G. Scalmani, V. Barone, G. A. Petersson, H. Nakatsuji, X. Li, M. Caricato, A. V. Marenich, J. Bloino, B. G. Janesko, R. Gomperts, B. Mennucci, H. P. Hratchian, J. V. Ortiz, A. F. Izmaylov, J. L. Sonnenberg, D. Williams-Young, F. Ding, F. Lipparini, F. Egidi, J. Goings, B. Peng, A. Petrone, T. Henderson, D. Ranasinghe, V. G. Zakrzewski, J. Gao, N. Rega, G. Zheng, W. Liang, M. Hada, M. Ehara, K. Toyota, R. Fukuda,

J. Hasegawa, M. Ishida, T. Nakajima, Y. Honda, O. Kitao, H. Nakai, T. Vreven, K. Throssell, J. A. Montgomery, Jr., J. E. Peralta, F. Ogliaro, M. J. Bearpark, J. J. Heyd, E. N. Brothers, K. N. Kudin, V. N. Staroverov, T. A. Keith, R. Kobayashi, J. Normand, K. Raghavachari, A. P. Rendell, J. C. Burant, S. S. Iyengar, J. Tomasi, M. Cossi, J. M. Millam, M. Klene, C. Adamo, R. Cammi, J. W. Ochterski, R. L. Martin, K. Morokuma, O. Farkas, J. B. Foresman, and D. J. Fox, Gaussian, Inc., Wallingford CT, 2016.
